# Supplementary material for: Genome-Wide Fitness Test and Mechanism-of-Action Studies of Inhibitory Compounds in Candida albicans
Source: PLOS journal article supplement (doi:10.1371/journal.ppat.0030092), 2007-06-27
Supplement: S1 (10.1371/journal.ppat.0030092.s001) [file journal.ppat.0030092.st001.xls]

## Sheet: Supplementary
orf19	S. cerevisiae ortholog	fluconazole 0.1 µg/ml (F=0.85) Fig 2C	fluconazole 0.162 µg/ml (F=0.80) Fig. 2B, 2C	fluconazole 0.18 µg/ml (F=0.72) Fig. 2C	fluconazole 0.2 µg/ml (F=0.63) Fig. 2C	ketoconazole 0.001 µg/ml (F=0.94) Fig. S1	clotrimazole 0.002 µg/ml (F=0.81) Fig. S1	econazole 0.025 µg/ml (F=0.97) Fig. S1	sulconazole 0.005 µg/ml (F=0.70) Fig. S1	voriconazole 0.002 µg/ml (F=0.87) Fig. S1	terbinafine 0.09 µg/ml (F=0.57) Fig. S2B	terbinafine 0.11 µg/ml (F=0.50) Fig. S2B	lovastatin 30 µg/ml (F=0.63) Fig. S2C	lovastatin 40 µg/ml (F=0.54) Fig. S2C	dyclonine 11.5 µg/ml (F=0.66) Fig. S2D	dyclonine 13.0 µg/ml (F=0.58) Fig. S2D	dyclonine 15.6 µg/ml (F=0.33) Fig. S2D	amphotericin B 0.205 µg/ml (F=0.67) Fig. S3A	amphotericin B 0.238 µg/ml (F=0.44) Fig. S3A	amphotericin B 0.271 µg/ml (F=0.40) Fig. S3A	amphotericin B 0.304 µg/ml (F=0.28) Fig. S3A	ECC69 0.45 µg/ml (F=0.91) Fig. S3B	ECC69 0.50 µg/ml (F=0.84) Fig. S3B	ECC1384 0.05 µg/ml (F=0.46) Fig. S3B	ECC1384 0.10 µg/ml (F=0.32) Fig. S3B	cerulenin 0.095 µg/ml (F=0.91) Fig. 3A	cerulenin 0.105 µg/ml (F=0.83) Fig. 3A	cerulenin 0.120 µg/ml (F=0.74) Fig. 3A	tunicamycin 0.150 µg/ml (F=0.83) Fig. S4A	tunicamycin 0.225 µg/ml (F=0.76) Fig. S4A	tunicamycin 0.275 µg/ml (F=0.68) Fig. S4A	aureobasidin A 0.010 µg/ml (F=0.81) Fig. S4D	aureobasidin A 0.020 µg/ml (F=0.64) Fig. S4D	aureobasidin A 0.065 µg/ml (F=0.57) Fig. S4D	caspofungin 3.25 ng/ml (F=0.71) Fig. S5A	caspofungin 5.00 ng/ml (F=0.53) Fig.S5A	caspofungin 8.00 ng/ml (F=0.39) Fig. S5A	ergokonin A 30 ng/ml (F=0.72) Fig. S5A	ergokonin A 40 ng/ml (F=0.52) Fig. S5A	ergokonin A 50 ng/ml (F=0.40) Fig. S5A	brefeldin A 1.0 µg/ml (F=0.93) Fig. S6A	brefeldin A 1.5 µg/ml (F=0.75) Fig. S6A	brefeldin A 2.0 µg/ml (F=0.53) Fig. S6A	nocodazole 12.5 µg/ml (F=0.85) Fig. 4A	benomyl 6.5 µg/ml (F=0.68) Fig. 4A	mebendazole 50 µg/ml (F=0.96) Fig. 4A	thiabendazole 50 µg/ml (F=0.78) Fig. 4A	cytochalasin D 100 µg/ml (F=0.73) Fig. S7	cytochalasin D 120 µg/ml (F=0.53) Fig. S7
orf19.4161	QRI2	0.5099	0.7359	0.2206	-0.3454	0.2702	2.4175	-0.2287	-0.6745	1.2129	-0.6321	-0.3987	2.2991	0.273	0.3396	-2.2588	-2.3051	0.8148	2.0222	2.4453	1.6275	0.3176	0.0257	-0.6204	0.0148	1.664	0.2741	0.6344	0.421	1.5857	0.8291	1.5696	0.9424	1.1378	-1.8284	0.0117	-2.3329	-2.1971	-0.0351	-2.0047	-1.1378	0.7527	-1.1821	-2.4168	0.616	-0.7178	-1.2854	1.4684	-1.25
orf19.1434	DPB11	0.3829	-1.1631	0.0912	1.0901	1.8185	0.1473	0.3352	0.1217	-0.5978	1.2354	1.1228	0.2891	2.0546	0.581	0.7226	0.1394	1.6891	0.6555	0.2626	0.5449	-1.2073	-1.0612	0.0937	0.9902	-1.3912	-2.155	-1.2653	-0.7733	0.1993	0.3127	0.9379	1.0944	0.0433	0.3514	1.0249	0.5005	2.0534	0.3344	1.6391	-0.8312	0.5052	1.4626	2.3521	-2.1094	1.0551	-1.06	-0.4928	0.8444
orf19.6821	APC2	0.9895	0.9941	0.885	1.2377	0.9647	0.9999	1.5056	1.0453	1.2918	1.0371	1.401	1.079	0.8463	-0.5803	0.9624	0.2124	0.3623	0.1191	0.4679	-0.9022	-0.9063	0.0951	1.0492	1.1483	1.5678	1.1729	0.8428	0.8796	0.3965	1.8754	-0.8158	0.2302	0.8838	-1.4172	-0.418	0.0765	1.5063	0.3491	1.6524	0.6927	1.069	1.2844	-0.5491	-0.3498	-0.5916	0.1573	0.7094	0.3848
orf19.2831	RPC31	-0.873	-0.9063	-0.3608	0.1136	0.7926	-0.6554	-0.6009	-0.7439	-0.356	0.4225	0.3917	-1.4764	0.455	0.9609	-0.2714	-1.0786	0.6574	0.1368	1.0083	-0.9813	0.4656	0.1555	0.5177	-1.1941	0.1454	0.1307	0.2399	0.4399	0.0577	0.3763	-0.8292	0.2403	-0.3929	-0.5496	0.3047	-0.9712	1.321	0.1289	-1.3515	0.9173	-0.754	-0.5665	1.3822	-1.0229	-0.7008	0.0868	-0.9627	-1.4558
orf19.7361	SEN54	0.6205	-0.5595	0.2548	1.0828	0.8865	-0.6147	0.1076	1.0802	0.5619	0.0008	0.0008	-1.1051	1.4387	-2.0171	0.8353	0.235	0.0907	-2.4535	-0.6515	-0.4966	-1.613	-1.5288	0.5553	-1.2235	0.4248	-1.6518	0.3291	0.1029	0.3656	0.6682	0.4215	-0.9756	-1.5825	-0.9295	0.3345	-0.6433	1.3039	0.6769	1.8007	-0.1319	-0.3932	0.236	-2.1874	1.2697	-2.1006	0.497	0.5183	0.8587
orf19.474	YHR036W	-0.906	-0.9928	-0.1792	-0.298	0.3713	-1.0355	0.1017	0.9285	-0.6474	-0.4716	0.1547	1.545	-0.8767	0.2762	-1.1418	-0.8175	0.3208	0.5077	0.0765	-2.7815	0.3102	0.1863	0.5969	-0.6551	0.237	0.1296	0.3845	-1.3804	0.2349	-0.5793	1.0744	1.1443	0.9279	0.4896	-1.1119	-0.9509	-0.1961	0.1126	0.4209	0.2623	-0.1894	0.7743	-0.6233	-0.9422	1.5013	0.0983	-1.337	0.2331
orf19.579	FOL1	0.2142	0.6847	0.8717	0.4369	-0.8153	1.2602	2.1517	0.8282	1.9333	0.9311	1.0187	1.4063	0.4982	-0.3745	0.0163	0.8382	0.6399	-0.3508	-0.1274	1.258	0.5534	0.0567	0.5518	0.25	0.5824	0.8337	0.4834	0.5885	0.7571	0.7065	-1.1636	1.4831	0.8765	1.2508	0.3377	-0.8144	1.1128	1.7095	1.6519	0.1902	1.1252	0.9548	-0.5786	-0.8228	3.0796	0.5852	0.842	0.3171
orf19.423	DCP1	-0.4026	-0.849	-0.5389	0.215	0.438	-0.9541	0.1659	-1.3523	-0.7982	-0.9626	-0.7264	-0.9723	-0.884	1.9316	0.8325	1.022	-0.4105	0.4273	0.3791	-0.6995	0.3464	0.4287	0.867	-0.9032	-1.854	-1.812	-2.1491	1.0151	-0.5246	-1.2075	0.2888	0.5465	0.4551	1.3959	0.0019	-0.6123	1.9283	1.0052	1.8915	-1.1408	-1.557	-1.5029	-0.839	-2.0869	-0.7878	0.7276	0.4839	0.9913
orf19.6346	BCP1	0.5988	-0.3271	0.4335	0.4124	0.9801	0.5134	0.4535	1.1748	0.2201	0.8383	1.1188	0.3857	0.2709	1.1281	0.8634	-0.5011	-0.4817	-0.9932	1.0282	0.4164	-0.2555	-0.4448	0.5903	0.1056	0.9208	0.79	1.1016	1.6577	0.2673	1.0922	0.8819	0.721	0.8947	1.7092	0.866	1.0338	0.0803	0.1639	-0.3547	0.5694	0.4314	0.6721	0.1695	0.6042	-1.1858	0.2318	-0.6546	0.6732
orf19.7604	TRS120	-0.3786	0.3944	-0.9235	-1.4719	-0.5277	0.8627	0.5086	1.2099	0.0515	-0.4913	-0.6963	2.0872	1.2896	0.9867	1.3895	0.3273	-1.6235	-1.4648	-1.8962	-1.6214	2.3968	1.8002	0.1317	0.8982	-0.3682	-0.7175	-1.788	1.5133	3.1865	3.4331	0.6615	2.5241	2.3295	-0.8199	-1.6348	-1.6707	-1.2873	-1.1592	-1.068	-0.4095	-0.7627	-1.8626	1.804	-0.9083	0.7064	1.1263	-0.2266	-1.6024
orf19.5363	YBR070C	0.3183	1.0389	1.3367	1.3585	-1.4208	2.2501	1.3652	1.3573	1.1993	0.1903	0.1726	0.4591	1.9003	-0.9844	-1.3984	0.4185	-0.619	-0.9287	0.281	-0.3402	0.6111	0.7324	-0.6424	-0.4291	0.8805	0.667	0.6384	-1.481	0.6533	1.1602	0.2807	1.4026	1.9086	-0.8178	0.6809	-0.6793	1.5061	1.352	2.18	1.1711	0.0324	0.684	-0.9705	0.1865	1.0366	0.9285	0.2875	0.5795
orf19.7620	SPP2	0.5655	0.7449	0.7341	0.408	1.3371	0.8246	1.3875	3.3458	0.7952	0.0007	0.0311	0.3565	0.6523	-2.1476	-1.1709	0.9584	1.3382	1.5331	1.7086	1.9555	0.8644	0.6433	0.7373	0.2549	0.3802	0.9074	0.406	0.1505	1.1142	0.6055	0.7103	ND	1.6819	1.3184	1.4953	1.2947	ND	0.9835	0.3674	0.677	0.0298	0.2175	0.3568	1.1903	3.1991	2.2975	1.7529	0.8536
orf19.5884	URB2	ND	ND	ND	ND	ND	ND	ND	ND	ND	0.4504	-0.2406	ND	ND	ND	-0.9523	-0.6278	0.2789	0	1.3761	-1.3222	ND	ND	0.5042	-0.5559	ND	ND	ND	ND	ND	ND	ND	ND	ND	ND	ND	ND	ND	ND	ND	ND	ND	ND	ND	ND	ND	ND	-1.1657	0.8731
orf19.1569	UTP22	1.4066	1.8484	1.7505	1.5691	2.1623	0.9315	0.4625	0.8097	-1.0596	0.3154	0.5916	-0.7162	-1.5378	2.2687	0.4759	0.5395	0.6069	2.744	1.9662	2.1759	0.8118	0.2683	-0.4733	-2.1341	-0.8103	-0.1631	-0.7162	-2.6198	-0.2509	-0.2501	-0.9433	0.0287	0.1798	0.361	0.04	-0.7619	0.6527	0.0922	-0.7744	1.3213	1.4451	1.6176	0.3603	-2.1165	0.8505	-3.0207	-2.6632	0.5508
orf19.2070	RSC58	0.3582	-0.2008	-0.904	-1.0612	-2.255	-0.8563	-1.3161	0.2826	0.437	0.257	0.6006	0.1017	0.6858	0.7985	2.4241	2.9217	2.6672	1.7324	2.9231	1.7033	1.0677	0.5904	1.6668	0.7918	-1.1378	-1.9824	-1.8258	0.3317	1.6545	0.9318	-0.8271	0.1543	0.6036	0.1202	0.5409	0.6604	-0.2058	-0.2254	0.4401	-1.3209	-0.7338	-0.6944	-0.7526	2.0569	0.5814	0.7972	1.0486	0.853
orf19.379	IPI1	-1.3422	-1.2672	-0.6267	-0.6315	1.1562	-0.8315	-1.0785	-0.5126	-0.7177	-1.529	-0.922	-0.7686	-0.2617	1.0399	-0.4626	-0.98	0.1191	-0.2182	0.946	-1.1763	0.4795	0.1898	-0.8346	-1.1315	-1.2115	0.0912	0.9824	-1.222	0.1888	-1.1505	1.3359	0.5769	0.7976	1.4215	2.7629	-0.2369	-0.604	-0.5101	1.3647	-0.3752	-0.9669	-0.6283	0.5101	0.4642	0.3818	-1.1964	-0.8682	-1.2217
orf19.4441	MCM10	0.9834	-1.2302	-0.9478	-0.5899	0.3201	-0.931	-1.1429	-0.3377	-0.2201	-1.8889	-1.9674	0.1343	-0.3877	0.5795	0.041	-1.3277	0.644	2.397	0.7256	0.8978	0.3971	0.9958	0.1269	0.7107	-0.7765	-0.682	0.9827	-0.953	-1.4607	0.2186	0.9466	0.4499	-0.2113	0.2605	-1.2919	-0.0889	0.1386	-1.501	-1.4673	-1.5518	-1.528	-0.2525	0.3487	0.5728	0.9377	1.1164	-0.82	-0.2647
orf19.4601	TFC1	0.8005	0.3785	0.5935	1.1366	-0.6202	-0.7535	0.4292	2.0731	0.1154	0.7462	-1.2195	-1.4032	1.7605	-1.4616	-0.1415	-0.8698	0.3424	0.5474	1.6432	-0.599	-1.4529	0.2843	0.1373	-1.0927	1.7135	0.6126	0.8488	-0.48	0.3603	-0.9246	-1.6974	0.0183	-0.9763	0.1476	1.1205	0.6881	1.4545	-0.1954	1.5822	-0.1242	0.1186	0.229	0.4818	1.3257	-2.4847	0.1358	0.7805	-0.2808
orf19.6341	RIB7	-0.8132	0.1972	-1.7997	-2.9325	-0.5436	-1.5836	-1.4436	-0.7182	0.5264	1.8647	1.1852	1.3716	1.1188	1.1403	-0.5279	-0.7981	2.3501	2.7585	1.4655	1.9241	-0.6353	0.7995	-0.8149	0.0845	-2.7124	-2.3997	-3.5155	1.2206	2.4387	2.1757	0.3794	0.6678	0.742	0.5191	1.4348	-0.5169	-0.5862	-0.9305	-2.1701	-0.8453	-0.5584	-0.3167	2.4379	0.7607	-0.8141	-0.9628	0.2557	0.7654
orf19.563	YPR143W	ND	ND	ND	ND	ND	ND	ND	ND	ND	1.3681	1.1024	ND	ND	ND	0.4351	0.6085	-1.8956	-1.3615	-0.8542	-1.2406	ND	ND	1.026	0.5624	ND	ND	ND	ND	ND	ND	ND	ND	ND	ND	ND	ND	ND	ND	ND	ND	ND	ND	ND	ND	ND	ND	0.0049	0.3108
orf19.4120		-1.8616	-1.4764	-1.4497	-0.8567	0.937	0.2728	0.0412	-0.2246	0.1601	0.3943	0.2753	-0.378	0.1209	0.4865	0.4981	-0.329	-0.1938	-0.4588	1.1527	-0.4749	-0.4754	-0.225	-0.4988	-0.0726	0.4458	0.0937	0.4409	-2.517	-1.9415	-1.7316	1.7316	0.6281	0.4976	3.4282	-0.3209	-1.1419	-0.3166	-1.845	-2.234	-2.2087	-1.5944	-0.9976	0.9502	0.5993	0.0785	-1.6792	-1.1431	-0.1762
orf19.3447	PBN1	1.9697	0.9999	1.2166	0.9362	1.3972	2.9236	0.9639	2.4545	-1.771	0.9229	1.6592	0.9342	1.8977	0.8532	0.9437	0.9098	0.6813	0.4216	2.4281	1.5949	0.3326	-0.5131	1.0545	0.8008	1.1728	0.2477	0.3895	1.8266	2.2287	1.0684	1.1978	0.4687	0.8746	0.2368	0.3143	-1.5516	0.9742	0.5912	1.2413	0.7969	1.1136	2.3121	-1.4646	-0.2765	-1.8127	-0.2293	-0.5487	1.5062
orf19.3724	YOR004W	-0.6914	0.0732	-0.6184	0.4824	2.2263	0.1592	-1.0722	0.5928	0.3306	0.0008	0.6933	0.4707	0.2711	-0.3338	-1.8238	-2.0469	0.7495	0.4169	-0.8083	0.1638	-1.0645	-1.3141	0.3586	0.6056	1.0966	0.1443	0.0936	1.1007	-1.7245	0.8662	0.3707	1.5261	1.3577	-1.0897	-1.0239	0.1198	-2.1405	3.6015	2.0907	1.2771	2.1507	0.4212	0.2194	1.1253	ND	0.6645	-0.1241	0.8472
orf19.7019	YML6	-0.5261	0.4291	-2.4295	-3.0509	-0.6634	-1.3676	-1.5447	-0.5573	-0.4186	0.6404	1.0128	-0.233	0.3928	0.0777	0.5575	0.6096	-0.0225	-0.8302	-0.601	-0.8153	-0.5978	-0.7126	-0.464	-0.3899	0.1456	-0.2082	-0.6553	-1.4327	-0.8242	-1.5918	0.2418	-0.1281	0.2903	0.8333	0.8251	0.186	-0.5013	-0.1554	-0.3029	-0.5929	-0.6935	-1.3714	-1.2436	0.9267	-0.3767	0.2948	-0.2649	-0.558
orf19.3062	FMP47	0.1116	-0.8219	-0.9234	-0.4192	1.2317	0.0369	0.3659	-1.2378	0.4558	0.5519	0.6058	0.4872	-0.9537	1.2796	-0.3168	0.7269	-0.5415	-0.6826	-0.9541	-1.6557	-1.3238	-1.4275	0.8575	1.0417	0.2231	-1.0008	0.6532	0.0854	-0.5344	0.1206	0.5701	-0.9914	-1.6395	-0.6879	-1.3616	-1.9681	0.4998	0.673	0.5489	1.8258	0.1714	0.4169	-1.9905	-2.6782	0.0348	-0.8869	0.2128	0.7661
orf19.5526	SEC20	-0.9099	0.1217	0.768	1.392	0.8352	-0.2957	-1.1501	0.0362	0.9161	-0.638	-0.55	-1.6694	-1.2316	2.4542	-0.9259	-0.807	1.6005	1.6437	0.3489	1.16	0.6049	1.1014	0.3243	-0.7554	-1.021	0.3978	0.2569	-0.5866	0.2307	-1.1317	0.211	0.5042	1.2373	-0.9593	2.0933	0.1593	2.0354	1.5994	2.0629	0.2395	-0.7449	-0.682	-0.9032	-0.8757	-2.3381	0.2772	0.2009	1.5262
orf19.4849		1.5875	0.5401	0.2843	0.1276	0.9389	-0.9273	1.2242	-0.4548	0.2476	0.0008	0.0008	0.7426	-0.9092	0.2149	0.0906	-1.6208	0.8389	1.1104	0.7845	0.4362	1.4243	-0.8541	-0.9846	0.5746	-1.5196	1.3983	1.9683	-0.1509	0.042	0.539	-0.5805	0.0855	0.5105	-0.5805	0.2262	-0.7266	0.5434	0.5594	ND	0.7305	0.147	0.0073	0.8525	-1.1946	0.1733	0.406	0.1696	0.0381
orf19.4606	ERG8	1.9698	0.1538	-0.6073	0.652	-2.0033	0.0309	0.7827	1.0207	1.8324	0.5111	0.6903	-0.5634	-0.6594	0.6613	1.3886	2.4882	1.4832	-0.7864	-0.2022	1.7442	-1.1255	-1.4884	2.2756	1.8351	0.6269	0.0288	0.0162	0.4215	0.4404	0.7461	1.1908	0.1304	-0.7572	-1.3946	1.5782	-1.2089	0.6855	1.147	0.5284	1.3355	0.6506	0.7448	1.7133	0.9818	-0.772	1.04	0.2929	1.0722
orf19.2313		-0.7749	-0.6288	-1.473	-2.1041	1.1	-1.1589	-1.2317	-0.8057	0.1268	-0.4545	-0.6139	-1.0036	-1.1684	1.0029	1.7097	0.5028	0.3897	-0.1997	0.0278	-0.2953	0.6215	0.9482	-0.33	0.3511	-0.7513	-1.1295	-1.3348	0.3428	1.9858	1.8214	0.062	1.4721	1.2633	-0.7264	-0.8962	-1.3134	-1.2637	-0.5939	-1.1614	0.287	-0.5198	-2.3908	1.5667	0.6317	0.0991	0.3804	-0.5515	-2.1583
orf19.7599	UTP5	0.7298	1.4217	1.2098	1.1459	0.0132	1.68	1.4372	0.6627	0.3238	0.8687	0.9996	1.2961	1.0151	-1.4712	0.1807	-1.7781	-1.3381	-1.916	-2.1208	-2.6805	-0.7467	-0.8964	-0.8059	0.6572	2.7233	2.483	2.2992	-1.4658	0.4087	-0.4382	-0.9574	-1.1992	1.2543	0.3714	-2.3143	-0.3212	2.2698	-1.0702	-0.5048	0.462	1.579	1.5974	ND	-0.3044	0.4892	1.199	0.9828	0.9107
orf19.4106	YJR141W	0.238	-2.0159	-0.9647	-0.7682	0.9124	-0.8569	0.0084	-0.929	0.7433	-0.9207	0.0666	-0.7261	-0.8796	0.4787	0.8892	0.5008	1.6289	-1.0426	-0.7777	0.708	-0.5659	-0.7978	0.2885	0.1548	-1.4817	-0.7309	0.3868	0.3761	-0.7835	-0.2092	0.8944	0.2766	0.8821	0.4777	0.1408	0.1713	1.4747	-0.2684	-1.0163	-0.2216	-0.9474	0.3629	-0.8436	-1.4603	-0.3451	-0.6547	-1.1895	-0.7223
orf19.1776	YGR277C	0.4431	0.6156	0.8324	1.0199	-0.4778	1.3904	1.1354	0.2208	0.8646	0.3585	1.2204	1.1144	0.9855	0.0785	0.8426	0.5763	-0.6932	-0.7031	-0.843	-1.1335	0.1601	-0.49	-0.7812	0.7195	0.9217	0.8098	0.6852	0.8282	1.0297	0.5558	ND	0.9092	1.0991	0.7804	-0.7518	0.6721	0.3133	0.3826	0.2768	0.0464	0.9331	1.1845	-1.2603	-0.9681	0.4402	0.4738	-0.176	0.5313
orf19.4443	YPD1	0.6404	-0.8565	-0.6226	-0.422	1.0548	-1.1048	-0.8166	-0.2652	-1.7215	-1.4224	-1.2694	0.1613	-0.8056	0.3853	-0.936	-1.0834	0.1791	-0.9414	0.0308	-0.9619	-0.3887	-0.4447	-0.4201	-1.1678	-0.9254	-0.4389	0.91	-0.5955	-1.7137	-1.6422	2.2953	0.4069	-0.1585	0.0239	0.3922	-0.4398	0.8791	1.4799	0.6556	-2.1219	-1.3454	-1.0096	0.1021	-1.6464	0.5337	0.2665	-1.0661	-0.5521
orf19.6880	COG4	0.4872	-1.1289	0.023	0.1748	3.711	-0.2607	0.4869	-0.4043	0.7897	1.021	0.6243	-0.5769	-0.789	0.1438	-0.2627	-0.0463	0.1477	0.1653	1.0934	0.454	-0.5979	-0.4857	0.2933	1.8217	-2.4759	-2.5153	-0.798	0.8149	-1.5978	0.2735	1.7948	1.5951	0.8296	0.6839	0.5269	1.3322	1.8564	0.8927	0.8378	-0.4331	-2.3528	-0.5892	1.2117	-2.0208	0.7245	1.2349	-1.2546	-1.5317
orf19.2717	SAS10	1.0145	-0.419	0.2978	0.5009	2.6799	0.6507	-0.1524	-0.9551	-1.3807	1.1323	0.6304	0.239	0.1135	-0.3028	-0.6566	0.8471	1.5368	1.399	0.3002	-1.0319	-1.0338	-0.7594	0.3581	0.1308	0.0609	-0.6686	0.2344	-0.9585	0.025	0.5652	1.3031	0.5536	0.0642	-0.5258	-0.7492	-1.3861	-1.068	-1.6095	-2.1437	-1.0809	0.0202	0.5775	0.029	0.7288	0.1241	-0.4637	-1.1181	0.9636
orf19.801	TBF1	-0.4536	0.382	0.5687	0.4403	0.233	0.9196	-0.4327	1.3973	-0.5535	0.2916	-1.2578	-0.9806	0.5942	0.4954	1.4108	2.0056	0.7519	-1.1894	-0.4466	1.7226	1.0771	1.565	0.7114	3.2948	0.6615	0.8615	0.7452	-1.214	0.1194	-0.4374	0.9742	0.3561	0.6317	0.9831	0.4103	0.085	-0.898	-1.4169	0.2658	0.6243	-0.6752	-0.8864	0.642	1.0003	1.3889	1.3137	0.6719	-0.9275
orf19.677	CHO1	3.2104	-1.3998	-1.0485	0.2833	0.0739	0.01	1.0911	-0.5037	-1.5774	0.0007	0.0007	-0.4233	0.013	0.2832	0.6195	0.0684	1.1468	0.3639	1.0393	0	1.0077	1.4241	0.9293	-0.486	-0.7657	0.2113	0.7251	ND	-0.2495	0.0944	-2.2466	0.15	0.1398	2.6896	0.6462	0.364	0.41	0.2453	1.0679	1.7086	0.7942	0.406	1.1646	0.5206	0.3173	0.4093	-0.6919	0.1986
orf19.6489	FMP45	0.4052	0.2217	0.4092	-1.0293	0.4393	1.077	0.2859	0.2965	1.1091	0.1845	-0.7492	-1.1771	-0.9591	0.6861	0.9969	0.7231	1.8966	2.4804	1.9374	3.4978	3.7548	5.0789	2.486	2.7953	0.9042	0.1532	-0.3056	-0.6347	0.3632	0.1988	1.2871	0.294	0.289	1.6223	1.4034	0.7344	-0.827	0.8889	0.4686	-1.1191	-0.8439	-1.6548	-0.9545	1.351	1.0298	-0.4555	0.3569	0.3915
orf19.1945	AUR1	0.5428	-0.0989	0.5797	0.7401	0.5547	1.6682	0.2979	0.6723	0.644	0.0008	0.0008	0.7477	-1.018	0.3004	0.1099	0.3996	2.0918	1.5006	1.0546	2.1181	0.4657	0.2836	-0.4827	-0.6052	0.7415	2.5154	1.0856	1.6848	1.7153	2.724	7.0467	17.918	10.3761	0.6596	1.1604	1.4752	1.8153	0.7696	1.5193	0.5483	1.2752	2.5511	0.4115	0.0339	0.911	1.7378	0.1866	0.4072
orf19.29		-0.7341	-1.1675	-1.4275	-1.613	1.1327	0.0481	-0.3941	-0.1851	-0.8289	-0.1222	0.008	0.086	0.1737	-1.4235	0.2989	-0.2253	0.673	0.3713	0.8084	-0.4351	0.6418	1.5902	1.2054	1.0276	-0.9831	-0.6794	-0.8947	-2.4076	-1.2023	-0.9972	0.9431	1.6951	-0.6158	2.3196	1.6811	-1.0959	-2.1702	-1.8683	-2.4343	-1.6889	-1.3762	-0.963	0.5527	0.7702	1.7621	0.3451	0.3102	1.3398
orf19.4566		0.4851	-1.4181	-0.8824	0.0506	0.4385	-1.3885	-0.9274	-1.6078	-1.8838	0.7869	0.4225	0.4266	-1.5158	0.2969	1.0141	0.6908	1.0108	-0.3045	0.5045	-1.5234	-0.6462	0.227	1.0841	0.5195	0.1285	-0.6864	-0.1406	0.1405	0.7612	0.9901	-1.9589	-1.3817	-0.9557	1.909	-1.8909	0.7506	0.7507	1.5442	0.7001	1.3391	0.175	1.2454	1.993	-0.729	0.068	-0.8798	-1.225	0.3183
orf19.2843	RHO1	0.0089	-1.5802	-1.4635	-1.1914	1.0126	0.1636	-1.2459	-0.3736	-0.8297	-0.4549	-0.5639	0.3869	0.3056	1.108	1.641	1.3776	0.995	1.0943	0.2438	-0.6456	0.3653	0.1972	0.0779	-0.3407	0.0297	-1.4708	0.0698	0.9581	-1.0426	0.4066	0.8957	0.739	-0.526	2.3974	6.4221	8.2835	0.4398	3.715	7.4051	0.2164	-1.2809	-0.854	-0.934	0.6112	-0.757	0.784	-0.8251	0.1359
orf19.922	ERG11	29.4416	18.4922	9.975	8.0629	16.9118	13.3937	12.4284	17.2014	23.638	0.1827	1.2117	0.3511	0.8682	0.0867	0.7273	1.489	-0.8095	0.7278	0.2905	0.3012	-0.3792	-0.4101	0.2927	1.0962	-0.4621	0.3615	-1.4572	1.1016	1.8415	2.9974	1.8664	-0.4408	1.8509	2.6456	1.34	0.7023	0.4899	3.1647	2.2557	1.2639	0.8571	1.854	1.9727	-0.8413	0.1476	0.6119	0.1973	0.2279
orf19.7101		0.678	1.406	1.5027	1.4238	-1.315	0.5568	1.2724	2.0489	0.4695	-1.3228	-1.2443	2.6045	1.8007	0.8007	-1.0516	-0.5736	-0.6177	0.2444	-1.3568	-0.3881	0.1675	0.4442	-1.4796	-1.423	0.3382	1.0984	1.8514	1.351	1.7752	1.249	0.2625	1.9895	2.4575	0.4396	1.7837	2.1813	0.3531	1.3219	3.0227	-1.64	-1.6861	-1.689	-1.2017	-0.5347	0.9528	1.1484	-0.3579	-0.4402
orf19.4410	ALG1	0.3927	0.7037	0.8232	0.5932	-0.88	1.6823	0.9871	1.165	0.5846	0.3992	1.3883	1.0977	-0.518	1.2473	0.3659	0.2932	0.4307	-0.7682	0.9177	-0.6479	-0.8687	0.0712	-1.3229	0.0214	0.2023	-0.5568	0.834	1.1926	1.1377	0.5957	-0.6839	0.0651	1.1506	1.0769	-0.8724	0.153	1.0633	0.6354	0.3188	0.0684	0.6203	0.8989	-0.5674	-0.6868	-0.644	-0.2265	0.5191	0.5711
orf19.6511	TRL1	0.6718	0.3514	0.1514	-0.5143	0.15	1.2136	1.9072	0.875	0.8685	1.8207	1.3911	2.1029	1.7473	1.2745	0.6279	-0.3982	1.1784	-0.3388	0.7322	-1.2322	0.4552	0.3688	-0.6969	0.1857	0.6059	0.0208	-0.666	1.0257	0.675	0.7288	-0.7979	-0.7423	0.5189	1.4548	2.136	0.1522	1.4985	-0.2748	0.9843	1.6879	-0.6854	0.0691	0.4851	0.9877	-1.9114	-0.9298	0.0418	1.3247
orf19.390	CDC42	ND	-0.3045	-0.628	-1.1449	1.2215	0.466	0.4121	-0.4004	-0.7123	0.1155	0.0103	-2.9057	-1.5804	-1.2511	-1.332	-0.8519	0.7255	-0.4496	-0.449	-2.7013	1.0446	1.9034	0.0661	1.1092	-0.5309	-1.2026	-1.5203	-0.7272	0.3653	0.2238	0.2166	0.5145	0.0653	-0.8794	0.1039	-3.0565	-3.6237	-1.3926	0.3735	1.5949	-2.3433	-2.3679	1.0884	0.8399	1.2454	0.5778	-0.8763	-2.3182
orf19.4772	SHO1	0.3565	-1.2492	-0.6915	-0.62	0.5687	-0.3575	-0.2345	-0.5978	-0.9961	0.0007	0.0007	0.1984	0.4548	0.8915	0.9526	2.4512	1.8214	0.8522	1.2429	1.2045	2.8855	3.1925	2.8165	2.2176	-0.5615	-0.6239	0.0223	-0.7339	-1.1977	-1.1801	1.2274	1.001	0.1962	0.6778	2.6894	-1.163	-0.7686	-0.4379	-0.582	-0.7094	-1.0381	-1.5335	0.2416	1.1403	2.1033	-0.3552	-0.6411	-0.4388
orf19.2609	CET1	0.0098	1.3952	1.4733	1.3926	1.0361	1.0176	0.3869	0.0191	0.5556	-0.7215	0.9168	1.3321	1.1042	1.3518	0.4214	-0.7921	0.6537	-0.9601	0.1166	-0.7783	-0.781	-0.4158	0.449	-0.6837	2.8584	2.1857	2.0703	-0.9	-1.1064	-1.3278	0.8774	0.4074	0.1694	-0.7175	0.1124	0.7849	0.3316	1.0744	0.6564	0.4927	1.0462	1.4614	0.1915	0.5317	-1.8	-1.0177	1.2055	1.1152
orf19.2560	CDC60	1.3048	0.1367	1.169	1.0697	1.0216	1.7038	0.7907	1.4807	0.6973	1.2576	1.4534	0.35	0.5069	1.7211	1.1701	0.3334	0.496	1.8407	0.7351	1.9243	-0.743	-0.5402	0.2703	0.0036	0.6517	0.8968	0.3657	2.2423	2.4584	1.8322	0.1185	0.677	0.1407	0.6063	0.388	0.3422	1.1128	1.4487	0.7136	1.2035	1.0021	0.6405	0.1642	-0.8472	-0.3864	-0.6255	0.397	0.3375
orf19.2334	BIG1	1.8482	0.2335	0.3811	0.426	2.1496	-1.1131	0.6622	0.5978	-0.6127	0.1716	0.0008	-0.8301	0.7779	-0.3945	0.4527	-0.6804	0.3069	-0.986	0.6997	0.6455	0.3017	0.6383	1.0046	0.3473	0.4577	0.5828	0.1243	0.7952	0.6327	1.3736	-1.2971	0.8053	0.2531	0.0113	0.1826	0.7367	1.1552	ND	0.3049	0.5712	-0.7488	0.2311	0.4192	0.2367	1.4894	0.321	-0.7996	-0.6172
orf19.7308	TUB1	-1.9752	-0.5855	-0.2345	-0.7871	0.0762	-0.2366	1.9366	-0.6837	-2.6864	0.7793	1.2211	-2.2826	-1.3208	1.8559	-1.2947	-1.7898	0.0397	0.4433	-0.6295	0.2805	0.1457	-0.4871	-0.5721	-0.3946	-2.0054	-1.0961	-3.1596	0.248	0.5171	0.1293	0.9154	1.0321	1.8006	1.6803	1.0762	0.7746	-3.2055	0.3738	1.1009	-1.8654	-1.7755	-3.4765	21.1325	8.7379	17.7961	19.8645	1.6524	0.7169
orf19.2187	ALG7	1.5433	0.2785	-1.0051	-0.5601	1.1123	-0.9705	0.1533	-0.5819	-0.5068	0.2502	0.1851	1.9028	1.5232	-1.0757	0.977	1.1319	1.5068	1.8552	1.0101	0.7194	1.5768	0.6408	0.8326	2.0074	2.2346	0.2428	0.9393	8.2635	6.8782	7.8202	2.0976	1.4388	-1.8291	1.3756	1.9657	0.1608	0.5246	0.0751	1.2977	0.3988	-0.8387	0.067	0.0801	1.605	-0.6951	1.2487	0.0604	0.0516
orf19.2929	GSC2	-0.6446	0.6067	1.1401	1.4294	1.1281	1.7577	1.266	1.0727	-0.5627	-0.5764	-0.5373	-0.3567	-1.968	0.1852	-1.1266	-1.1837	2.0934	1.5647	1.0183	1.3112	-1.4318	-1.9057	-0.6952	-0.9729	-2.8232	-4.5147	-5.673	1.0591	1.3383	0.8904	0.7115	2.8701	0.8642	1.4075	3.0191	3.2558	3.0783	4.0427	9.0254	0.3738	3.8187	3.8973	-2.7809	1.5521	-0.0896	-1.4675	-1.5267	2.594
CaYOL026C		-0.3626	-0.2408	-0.2146	0.1756	0.2574	0.1574	0.2038	0.3782	-1.5312	0.0511	-1.3697	0.0568	0.5821	0.177	0.0136	-0.4949	0.4951	0.188	1.3797	0.8011	0.9039	0.7073	0.1472	-0.6953	0.1065	0.7093	1.1633	-0.8889	0.1005	-0.1475	1.5934	1.0536	0.3753	1.5495	-0.8179	0.7755	-1.9702	-1.215	-0.4003	-1.3905	-0.5911	-0.3142	0.7383	0.8671	0.4992	-0.8124	-0.8606	0.2045
orf19.4473		-0.6013	-1.7527	-1.6069	-0.8131	1.2732	-0.8397	-0.3337	0.8178	0.2362	1.7432	1.7362	-1.0227	0.1086	-0.8649	1.4342	0.5102	0.6759	1.9547	0.9366	-0.8029	-1.8077	-1.6528	-0.9131	1.3917	-0.6454	-0.2492	-0.5208	-0.3274	0.1733	-0.6921	1.2647	1.1944	0.5432	-0.2889	-1.4998	-0.7198	0.1143	-1.8729	-1.0489	1.3004	0.0677	0.6703	-0.0911	-1.1141	-1.4133	0.0917	-0.9807	0.1974
orf19.3970	YGR251W	-1.8475	2.2206	2.0237	1.2935	-1.5849	1.3504	0.8552	0.6376	2.3016	0.7814	-0.4714	-0.5036	-0.6005	-1.1046	0.4097	0.3083	0.54	-1.1108	0.4271	0.2061	0.8058	0.7932	-0.8301	-1.059	0.5715	1.949	1.8411	-1.3612	0.51	2.0403	0.0845	0.543	1.5284	0.9341	-1.1926	0.7979	0.0045	0.9646	1.5892	1.3506	0.3514	1.0513	-1.312	-0.2722	-1.3864	0.4886	1.5197	0.1184
orf19.5692		0.3224	0.8568	0.7811	0.7268	-0.8889	0.9944	1.3879	0.0173	0.9492	0.811	1.0793	1.5038	0.6106	-0.9875	0.4337	1.0803	0.1915	0.9091	-0.7901	-0.6369	-0.92	-0.7269	0.4921	0.9396	0.6778	0.4182	0.7191	0.7438	0.4721	1.5175	0.294	1.0028	0.6913	0.1836	1.1645	0.6543	-1.0922	-1.4104	-1.4689	0.1069	0.3042	1.3484	-0.3789	-0.9146	1.9165	0.5764	0.8669	1.994
orf19.6512	EXO70	0.3257	0.3689	0.8633	1.2561	1.9659	0.9737	-0.143	0.2675	0.1755	0.4587	1.2929	0.8395	-0.6145	0.7657	0.6949	0.1534	1.4915	1.0422	0.97	-1.1714	0.687	0.7392	0.0489	-0.2807	0.3022	0.0356	1.0285	2.3011	0.8113	1.2884	1.5992	0.6295	1.0655	0.7139	0.0931	-0.9992	1.1787	0.161	0.4288	0.3414	0.8322	0.9315	-0.3774	0.3919	-3.4364	-1.327	0.0774	-0.2389
orf19.5166	DBF4	0.631	0.4255	1.1257	1.9895	0.4151	1.9713	0.9921	0.9714	1.2754	1.2818	1.4844	0.8629	2.0677	-0.8517	0.7507	1.5028	0.6071	0.974	0.8353	2.1151	-0.6344	-0.3954	0.3541	1.1166	-0.4062	-0.6331	-2.062	0.4378	1.7637	1.2874	-0.5852	-0.6036	0.1847	0.2056	0.3522	0.9137	1.5181	0.1499	0.3833	0.3702	1.4227	1.3747	-0.6527	0.7576	0.3712	-1.2345	1.084	0.6999
orf19.7492	SWC4	-0.155	0.7284	-1.7418	-1.5247	-1.1749	0.2539	0.1134	0.1282	0.3827	0.6667	-0.5242	-0.4448	-0.9428	-1.2384	-1.7165	-1.3313	0.5706	0.4368	0.137	-1.0132	0.1824	0.4508	-0.7994	0.3041	0.9473	0.951	1.2452	-0.4007	0.0935	0.3399	0.6057	-1.466	-0.3296	-0.4993	0.7463	0.6251	-0.5673	-0.6001	0.3042	0.7157	0.9825	0.7179	-0.1339	1.1179	0.5487	1.5613	1.0639	-0.9116
orf19.6942	ORC3	-1.1897	-0.448	-1.884	-2.6251	0.7243	-1.6095	-1.3443	-0.864	-0.4646	-0.5604	-0.3425	0.8637	0.4578	0.6872	1.0464	0.0377	0.0601	0.2658	-0.1086	0.7024	4.4276	3.6755	-0.1474	0.4321	0.1038	-0.6865	-2.1688	0.9153	0.3933	0.0437	0.9081	1.143	0.6662	0.7659	-0.4711	-0.6782	-1.452	-2.652	-1.1798	2.9869	1.1803	-1.8245	1.0518	1.4351	0.5606	2.7673	0.2343	-0.6176
orf19.7141	UFE1	1.7956	1.036	0.8731	0.1014	-1.8902	2.3855	1.6306	0	1.1989	0.4827	0.9653	1.9071	2.5802	-1.4587	0.6597	1.4963	-0.2795	-0.4067	-0.1031	0.1155	0.3488	0.1387	0.4761	0.8667	0.4276	0.585	1.1727	1.9181	2.969	1.2641	0.0317	0.7177	1.1292	0.8035	0.1909	-1.3369	1.159	0.6329	1.3882	0.5839	1.0476	1.9351	-0.5072	0.0899	-2.0517	0.2212	0.3865	0.1436
orf19.1885	TAF4	0.4466	0.9074	1.021	0.2069	0.5129	0.972	0.0099	0.7665	0.2757	0.7127	-0.7769	0.0027	0.4244	0.7075	1.1088	3.4398	1.347	0.745	0.8916	0.7544	4.0257	3.5743	2.5333	3.3078	0.6284	1.0217	0.9228	-1.7983	-1.9978	-1.7743	1.6709	1.0856	0.9235	1.6719	0.3974	-1.3621	0.3191	0.6756	-0.5129	-1.2061	-0.8154	-1.4772	0.2954	1.8635	-1.2685	1.1486	0.6106	-0.5505
orf19.708	SPC97	-0.6935	0.6997	0.6581	0.1763	0.3654	-0.3978	0.028	-0.3369	-0.6707	-1.0819	-0.8988	-0.1551	-1.3329	0.0548	-0.42	-0.8838	-0.8053	0.1478	-0.5978	-1.0197	0.3044	0.7465	-0.8192	-2.0627	1.046	-0.2162	0.4012	0.2594	-0.9685	-0.9531	0.8429	1.4504	-0.3645	1.0995	0.2732	-1.7721	0.2331	-0.9146	0.1612	-1.2674	-0.8364	-0.0848	-0.1588	-1.0454	-0.4698	-1.6185	-0.89	0.225
orf19.3083	CDC1	0.4835	0.8149	0.8757	0.8672	0.4466	3.314	2.4425	0.5684	0.5911	1.1486	1.4365	1.3626	1.8675	-1.5164	0.6857	0.5844	0.7032	-0.0971	-1.0142	-0.177	0.1863	0.4666	0.164	0.5027	0.3274	0.4261	0.8194	1.0638	1.4895	1.5159	0.8279	0.8018	2.1706	-0.9654	0.0176	0.0045	0.6042	1.4905	2.3377	-1.085	0.9688	1.7424	0.313	-0.9071	-0.2457	0.1595	0.7403	0.2374
orf19.4705	CCA1	-0.7983	0.4913	0.2259	0.8763	-0.4206	0.9312	1.0921	1.5782	0.6737	1.3338	1.4179	0.4631	-0.1609	-1.8467	-0.6629	0.4316	-1.0101	-1.0477	0.3267	-1.006	-1.7085	-2.0918	0.4109	0.0729	0.4161	0.9301	-0.0183	0.0941	0.1756	-0.6961	-0.92	-1.1552	-0.7968	0.872	0.0304	-2.3655	-1.1905	0.3436	-2.2861	0.6459	0.9524	1.2227	-1.5187	0.2754	0.5853	1.5274	1.6946	0.9661
orf19.4497	MED8	1.3762	-1.0999	0.1922	0.5532	0.3043	-1.2441	-2.4812	-1.4894	-1.2158	-1.61	-1.6737	-0.212	-0.8495	0.3788	-1.6172	-0.9804	-0.5178	-1.8093	-0.1397	-0.9047	-1.069	-0.8548	-0.901	-0.8665	-1.5776	-2.0419	0.2727	0.1358	0.0764	-0.1899	-1.3809	-0.954	-2.6796	-1.0091	-1.6997	0.19	-1.4392	-1.2085	-0.7397	-1.0363	-0.4907	0.5556	1.4697	-1.667	-0.9278	0.0285	-0.4406	-1.1353
orf19.3333	NAB2	0.5776	0.5414	0.6869	0.541	-2.9748	1.0146	0.5348	0.5009	0.4731	0.2288	1.0589	1.2689	0.287	-1.101	-1.292	-1.2398	-1.1109	0.2237	1.5623	-1.5725	-1.421	-1.3061	-1.6976	-2.4556	1.4136	1.4271	0.8251	0.5218	-1.4826	-1.2664	0.9271	0.8554	-0.9488	-1.2099	-1.1904	-0.878	-0.8577	-1.8579	-1.5159	0.6337	-0.5348	-1.1926	0.1885	0.7442	-2.8923	0.476	-1.411	-1.4736
orf19.2362	YOR287C	-0.3731	-1.5983	-0.8972	-0.8607	0.1979	-1.2303	-1.1656	-1.4616	-0.8309	-1.3534	-1.9234	0.188	-1.1138	-1.0475	-0.1395	-0.7373	-0.6571	-0.873	-0.8666	-1.5539	0.1432	0.2233	-0.4841	-0.6742	-0.2451	-0.2934	0.4636	-1.6799	-1.0407	-0.5539	0.9464	0.3939	-0.4047	0.6092	0.3962	0.033	0.0967	0.079	0.0135	-1.1189	-1.5261	-0.1853	0.7055	0.1751	0.6847	-1.8542	-0.8913	0.4707
orf19.3060	SWP1	-1.803	-1.0725	-1.1669	-0.6707	-0.8202	-1.582	-1.6737	0.9707	0.2719	0.7638	-1.3	0.509	-0.7292	0.5461	0.1945	-0.526	-0.4715	0.4178	0.5954	-3.4552	4.0977	2.4247	0.263	-0.4544	0.6942	0.3041	0.9405	0.2652	-0.7854	-1.6764	1.5772	0.2905	-0.242	0.4038	-0.2426	0.5006	-0.7883	-1.1031	1.5175	-0.4774	-0.9426	-1.6049	0.129	0.9708	-0.7262	0.2182	-0.6636	-0.8865
orf19.2825	DRE2	-1.3228	-0.3765	0.7807	1.0404	1.5859	-1.0877	-0.8865	0.5279	0.1923	-0.903	-0.7648	-1.5834	-0.6907	1.911	0.4819	-0.2135	0.3543	1.2159	-0.4107	-0.2729	0.7071	0.5346	0.2599	-0.988	-1.4046	-0.1915	-0.2921	-2.1461	0.0732	0.2002	1.2056	1.2328	-1.3598	0.1083	0.0181	-0.7837	1.306	1.0077	0.3169	0.8309	0.2257	0.7116	0.8298	-1.2934	-1.1021	0.8538	-1.0317	-1.2501
orf19.5066	YDR412W	ND	ND	ND	ND	ND	ND	ND	ND	ND	0.1837	0.0008	ND	ND	ND	0.4608	-0.0987	-1.6954	-0.778	-1.6821	-1.4902	ND	ND	-0.7999	0.9417	ND	ND	ND	ND	ND	ND	ND	ND	ND	ND	ND	ND	ND	ND	ND	ND	ND	ND	ND	ND	ND	ND	-0.6914	-0.368
orf19.6903	RPC37	-1.3307	-0.5745	-2.1695	-1.5156	-1.3668	-0.909	-0.8761	0.7208	1.3623	0.8721	1.0166	0.4431	0.0769	1.3823	-0.3921	0.2422	-1.1759	-1.9355	-0.5546	-0.5745	-0.7135	-1.3369	1.2107	1.1882	-1.5061	-2.2668	-1.1723	1.1325	0.2363	-0.8836	0.9515	0.3626	1.6064	-0.3102	0.1868	-0.6802	-0.2833	-0.6443	-0.6318	-2.0741	-1.167	-1.2994	0.3128	0.2527	-0.8187	-0.2086	0.3372	0.0371
orf19.2519	NNF1	0.4858	-0.4161	-1.6343	-1.0509	1.6547	-0.4239	0.2811	0.4798	0.3361	0.0008	0.0008	0.8365	2.0464	0.2968	0.2148	0.5798	0.7131	1.1367	0.8598	1.1568	1.3598	0.7936	-0.475	-0.2612	2.1202	-1.6043	-2.3753	1.7646	1.3216	1.2802	ND	1.3834	0.8135	0.7629	-1.4298	1.267	0.8931	-0.57	-1.1036	2.2985	1.6432	0.3786	0.0243	0.6626	1.0886	-1.6113	-1.1987	0.2127
orf19.7072	PGS1	ND	ND	ND	ND	ND	ND	ND	ND	ND	-0.6736	0.1905	ND	ND	ND	0.0472	0.3769	-1.0998	-0.0907	-0.5165	0.1185	ND	ND	-1.1207	0.0635	ND	ND	ND	ND	ND	ND	ND	ND	ND	ND	ND	ND	ND	ND	ND	ND	ND	ND	ND	ND	ND	ND	0.6094	0.3725
orf19.6742	FCP1	-0.5789	-1.0688	-0.5064	0.3408	-0.4631	-0.6695	-0.7897	-0.7863	-0.6786	0.0657	-0.5944	0.8507	0.8006	1.018	-1.1519	-2.4883	-0.493	-0.3849	-0.5937	-1.2236	2.1317	2.2157	-1.0244	-0.5585	-1.3409	-1.4554	-1.5494	0.2862	1.7177	1.8735	1.2133	-1.588	-1.2545	0.6114	0.5847	-0.9747	-0.6327	-0.805	-0.4304	0.8374	-0.6895	0.3322	0.2597	0.4614	0.8006	0.401	0.8895	0.1458
orf19.3551	DAD2	0.0769	0.3428	-0.6431	-0.4005	1.8527	-1.649	-0.2931	0.5737	0.3221	0.0008	0.0008	0.5935	0.9069	1.0546	0.1683	-2.6277	0.2502	-0.3681	-1.1405	-0.854	0.3647	1.1265	0.0174	0.0307	0.8177	0.529	1.6788	0.3612	-1.8152	-2.6846	ND	1.2748	0.9451	0.4038	0.5286	0.5393	-2.2148	-1.4471	0.1083	0.5412	0.9249	1.2796	0.2724	0.0887	0.8239	-2.7296	0.4041	2.9942
orf19.6233	YNL181W	0.0877	-1.6255	-1.2955	-0.6021	0.3051	-1.7282	-0.9664	-0.462	0.1479	-2.1245	-1.9289	-0.7517	-0.5348	0.3399	0.3934	-1.1323	-1.3891	-1.5656	-1.2657	-1.6363	-0.547	0.0725	-1.3141	-1.5852	-1.4846	-1.1376	0.2161	0.1242	-0.4223	-1.1885	1.0425	0.9883	-0.4051	1.1543	-1.4099	-1.2723	0.0737	0.1439	-0.2114	-0.9663	-1.8376	-1.0986	0.0962	-2.3743	0.8711	-0.934	-1.2694	-1.3143
orf19.2367	YNL260C	ND	ND	ND	ND	ND	ND	ND	ND	ND	-1.5205	-1.0725	ND	ND	ND	0.0686	-0.4193	0.9591	-0.2725	0.5534	0.0607	ND	ND	-0.1905	-1.0973	ND	ND	ND	ND	ND	ND	ND	ND	ND	ND	ND	ND	ND	ND	ND	ND	ND	ND	ND	ND	ND	ND	-0.8088	0.4802
orf19.6884	GWT1	-1.0063	-1.2599	0.4658	-0.11	0.4795	-1.0025	-0.7913	0.8293	-0.9768	-1.8877	-1.7817	-0.6782	0.2031	0.97	0.3869	-0.3271	0.6639	0.2071	0.2949	0.2218	0.3369	0.4248	-1.463	-1.1103	-0.9304	-0.8173	0.7382	1.1052	0.3141	0.6871	2.0926	1.1429	1.1054	0.828	-1.9515	-0.8352	0.8696	0.0758	0.4683	-0.7437	0.0154	0.1658	0.1436	-1.3638	0.9102	1.2006	-0.8123	-0.6564
orf19.2319	ESF1	1.4391	0.485	-0.5762	-0.9737	-2.752	0.6971	0.2303	0.6768	0.4129	0.0008	0.0008	0.7773	1.8731	0.613	-1.7194	-1.1954	-1.3049	0.2481	-0.9893	0.091	1.2028	1.0654	-0.6611	-0.7852	1.9196	1.8713	2.0273	0.4491	0.6687	0.7858	0.0459	-0.6432	0.1223	1.5644	2.4241	2.074	-1.4585	2.055	ND	2.4021	1.0269	-1.0002	1.8702	0.0002	2.2044	1.7643	-0.4362	ND
orf19.6369	RIO2	ND	ND	ND	ND	ND	ND	ND	ND	ND	1.1043	1.1279	ND	ND	ND	0.0193	0.0513	1.7456	1.0325	0.5666	0.4741	ND	ND	1.0522	0.2785	ND	ND	ND	ND	ND	ND	ND	ND	ND	ND	ND	ND	ND	ND	ND	ND	ND	ND	ND	ND	ND	ND	ND	0.5316
orf19.2314	CGR1	0.484	0.1344	-0.3976	0.1409	3.0875	0.3017	-1.6671	0.1992	0.3963	0.7619	0.6155	1.3177	-1.0002	1.2099	0.7852	0.4325	1.1489	0.0881	0.0738	0.1017	1.8223	0.9108	-0.7756	0.1916	0.9512	-0.8453	0.0956	0.1266	-0.9273	-1.0478	0.5006	-1.1254	0.5385	0.5812	-2.2129	0.8209	0.1962	0.3807	-1.4011	3.4874	0.9231	0.4238	-0.7923	0.1115	-1.0813	-1.2039	-0.3723	0.0005
orf19.6917	FMP28	0.8695	-0.318	-1.6158	-1.8383	-1.3178	0.8057	1.0087	1.8729	0.4498	0.9205	1.0671	1.0892	0.0046	0.8552	0.7876	0.1474	-0.8398	0.5233	-0.8167	-1.4686	0.1797	-0.398	-0.7928	0.4636	0.8712	0.6843	0.8895	0.4527	0.5822	0.0225	-2.005	-0.6697	0.8163	2.1371	0.3448	0.0784	-0.7682	-1.5085	-0.7748	2.2367	1.8646	0.5346	0.7431	1.5452	-1.4754	0.6382	0.0484	-0.1373
orf19.4089	SGT1	0.3848	0.5958	0.6363	0.8295	0.6625	0.5094	-0.6989	0.2376	1.0881	-1.0055	-1.5459	0.2974	0.8982	0.5018	-0.4491	-0.7006	-0.7155	-0.5066	-0.5755	-0.8691	-0.9583	-0.4454	-0.9558	-0.4852	0.4537	1.0957	0.4428	1.8355	0.4204	1.0195	-0.3903	0.6461	-1.4771	-1.4431	0.4759	0.4905	1.0335	0.4559	0.9945	0.1868	0.5786	0.3947	-0.9103	0.2143	-2.0524	2.2311	0.744	0.662
orf19.5444	TIM44	2.0042	0.48	-1.7891	-1.6448	-3.4989	0.3175	-1.0529	0.9874	1.479	-0.6657	0.5555	2.4668	1.5671	1.0431	0.3313	0.599	0.7456	0.5383	1.1353	0.3155	0.5366	0.8953	-1.4355	-0.7249	0.4106	1.2157	0.9024	-0.6448	3.0508	1.0161	0.3835	1.4108	1.493	0.6287	0.2217	-0.7457	0.7737	1.2435	1.3395	-1.694	-0.8535	-0.135	2.4185	0.3504	-0.3055	2.289	1.105	0.1463
orf19.6524	TOM40	ND	ND	ND	ND	ND	ND	ND	ND	ND	-1.24	-1.5047	ND	ND	ND	0.3901	-0.3496	0.3838	0.5371	1.1831	0.3727	ND	ND	-1.333	-0.9014	ND	ND	ND	ND	ND	ND	ND	ND	ND	ND	ND	ND	ND	ND	ND	ND	ND	ND	ND	ND	ND	ND	0.3343	-0.9804
orf19.5850	NOC2	0.2684	-1.3717	-0.9995	-1.0817	0.2902	0.6158	-0.4292	-1.4249	-0.5515	0.042	0.0008	-1.391	-1.1755	1.5167	0.8324	0.224	0.0303	0.1263	0.083	0.1385	-0.8617	-0.6297	0.0384	0.5594	0.3923	-0.6972	1.3889	0.5911	0.0119	-1.1773	0.4426	0.8615	0.4933	0.3503	-2.5017	0.2966	-2.1184	0.0544	-0.7556	0.2176	0.0497	0.1203	0.0163	-0.5602	-0.1944	-1.3476	-1.554	1.4985
orf19.2179	ARN1	-0.2301	-0.8356	0.3838	0.232	-0.8979	-0.6613	-0.2733	0.0464	0.289	1.2035	1.8565	-1.4368	-0.6263	0.9102	0.7574	1.4867	1.277	0.4343	1.5904	0.6507	-1.922	-1.6323	-1.3991	0.6236	-1.3538	-0.9756	0.7467	0.6165	0.7016	0.5571	-1.1702	-2.1119	0.012	0.9012	-1.0551	-0.7224	0.1598	1.2448	-0.9199	1.2762	0.2347	0.2034	-0.8206	0.2091	-0.2828	-0.8439	0.5536	1.4922
orf19.4168	POP7	-1.1202	0.519	0.3083	0.4303	0.221	1.0324	0.8938	0.9672	0.799	0.3898	1.3685	2.053	1.9424	-0.8188	0.8055	0.6742	0.1313	-0.2512	0.4102	0.4351	-0.2809	-0.2311	0.5876	0.9401	0.7634	0.4728	0.1497	1.3771	1.0251	1.4748	0.4695	1.0989	1.3095	0.3991	-1.6096	1.1055	0.0295	-1.4945	0.5691	-0.7301	0.9917	1.4722	-1.4047	-0.5738	-0.2168	-0.966	0.7604	0.3954
orf19.3366	SHR3	0.2858	-0.6192	-0.4505	-0.0991	0.6439	0.6783	-0.7093	-2.2098	0.1025	0.0008	0.0008	-1.3251	-0.9942	-1.3225	0.6577	0.2304	0.6277	0.1369	1.1861	0.5241	1.0524	1.3481	0.9041	0.667	-0.5881	0.2159	-0.331	-0.5736	-1.115	0.2607	0.2762	0.9309	-0.6023	0.2797	1.0096	-0.6755	-1.0365	0.2573	-1.0851	-0.6699	-1.2237	-0.6024	-0.8436	1.7844	-0.3499	0.3982	-0.7947	0.3812
orf19.5008.1	DAD1	1.4155	0.5143	0.949	0.7474	-1.1871	1.271	1.1649	-0.5859	1.0892	1.6409	2.4155	0.96	1.5434	-1.0978	-0.9063	0.2054	-0.6089	-0.5309	0.3322	0.3789	0.1844	-1.1913	0.6451	0.5043	0.5693	0.2855	0.3197	0.9956	1.3882	0.6809	-1.5871	0.3766	2.1202	0.612	0.4403	-0.6097	-0.7831	0.4838	0.1279	0.0579	1.2019	0.7736	-1.0141	-0.0515	-0.1819	0.3301	0.8529	-0.5509
orf19.700	SEO1	-0.5011	-1.0067	-0.8186	-0.5159	1.8819	0.5822	0.5776	-0.9096	0.0406	2.0834	1.9982	0.5612	0.6463	-1.7033	-1.9881	0.3331	0.1139	0.1704	0.9294	-0.5409	-1.5062	-1.0639	0.7089	1.7958	0.4295	-0.4196	0.3074	0.0128	-1.1626	-0.6329	0.0794	0.7852	0.0356	-1.3992	1.7477	-1.24	1.6362	0.4248	-1.3935	-0.4265	0.389	0.6762	0.8603	0.3502	0.1244	-2.5705	0.4289	0.3463
orf19.688	MRPS18	0.2881	-0.779	-2.1013	-1.9109	-1.5842	-0.6046	0.0078	0.0845	0.1964	0.3687	0.151	0.4021	-1.1068	-1.5191	1.0851	0.1758	-0.5019	-0.7976	0.3504	-1.5869	-1.1776	-1.2486	0.8148	-0.5784	1.2799	0.7253	0.7114	0.1266	-0.9464	0.0784	0.5266	-1.346	-0.9753	2.0189	1.1175	0.3559	1.8983	1.3421	-1.7005	1.9542	0.4717	-0.5372	-1.2852	0.6663	-0.9146	-1.012	-0.8324	-0.7537
orf19.7037	YAE1	1.1985	0.3925	0.2136	0.1153	2.8869	0.1527	2.8253	0.8556	-0.6909	0.6869	0.3743	-0.3311	-0.1129	-1.2853	0.6167	0.0132	-0.7746	-0.547	0.1593	0.0945	1.1556	-1.4218	0.7365	0.2899	1.6813	-0.9671	0.4589	2.8812	0.6582	0.1446	0.4736	-1.3066	0.0208	3.4585	0.5222	-0.5801	0.6115	1.0042	0.3201	0.629	0.6693	0.4196	-0.9778	-0.8467	0.3389	0.538	0.4894	0.2239
orf19.7657	POP3	0.9122	2.5116	2.1328	2.2465	0.3107	1.4012	1.3128	1.9679	1.1344	0.0008	0.5535	1.7852	1.8704	-0.7327	-0.4042	3.1032	0.2619	0.3976	0.8275	0.4639	0.1112	1.2874	-0.5786	-0.6265	1.2064	1.1369	1.6783	1.3682	1.2978	1.9	-1.4337	0.8023	1.1731	0.3816	1.1774	-0.2638	0.3024	2.0032	0.7817	0.1747	0.3064	1.8462	-0.4985	-0.7653	0.66	-1.8025	0.1151	1.5156
orf19.135	EXO84	2.1797	0.2197	0.3785	0.0986	3.2794	2.1201	2.2592	1.9284	0.947	0.0008	0.0008	0.5818	0.6882	1.4146	0.6644	0.1854	-0.3704	0.2337	0.1934	-0.4611	0.4155	0.2018	0.7438	1.3444	0.3877	0.0373	0.0213	1.163	1.2351	0.6458	1.4775	0.8669	1.335	-2.302	-2.9908	0.3106	0.3593	0.9526	1.5959	0.2856	1.9311	1.3057	0.5912	-1.003	ND	0.1424	-0.6194	0.2975
orf19.2325	TFC6	ND	ND	ND	ND	ND	ND	ND	ND	ND	0.0008	0.0008	ND	ND	ND	-0.6017	0.552	0.5335	0.9245	1.0926	1.1529	ND	ND	0.469	-0.6315	ND	ND	ND	ND	ND	ND	ND	ND	ND	ND	ND	ND	ND	ND	ND	ND	ND	ND	ND	ND	ND	ND	-0.418	-1.9123
orf19.88	ILV5	-0.6087	0.3057	1.2872	1.5293	-1.4468	-0.0482	0.3001	1.5264	3.002	0.0867	0.4707	0.8691	0.1443	-1.3417	0.3785	-0.5597	-0.1555	-1.8069	-0.7703	-0.7849	0.9063	-0.8052	-1.1304	-0.7901	-1.1724	0.231	-0.8895	1.6304	0.7202	1.3735	-2.6034	-1.2729	0.2523	-1.3035	0.2189	0.1701	1.3907	0.9146	2.0995	0.6168	-0.5585	-2.2011	-1.1199	1.1246	1.7455	0.3431	1.0835	-1.0899
orf19.2735	SEN2	-1.4124	-0.8019	2.1043	0.113	0.5906	0.9525	0.5076	0.2002	-0.2533	0.1645	0.9641	0.0765	-0.775	0.2608	2.6855	3.0074	4.3595	2.8022	2.3776	1.5313	3.667	3.8037	3.3419	3.0199	0.5403	-0.9822	0.5195	-1.435	-1.0957	-0.0538	1.3717	0.84	0.658	1.7489	1.4567	0.3662	-0.7611	-1.427	0.0409	-0.9723	0.1682	-0.613	1.026	0.9874	0.8454	-0.8454	-0.8595	1.1476
orf19.4388		ND	ND	ND	ND	ND	ND	ND	ND	ND	0.0008	0.0008	ND	ND	ND	0.6938	0.3577	0.7081	1.2339	0.475	-0.167	ND	ND	0.5504	0.0754	ND	ND	ND	ND	ND	ND	ND	ND	ND	ND	ND	ND	ND	ND	ND	ND	ND	ND	ND	ND	ND	ND	-0.2659	0.6209
orf19.2389	SLD2	-0.4884	-0.5323	-0.3095	0.406	0.3302	0.2718	0.5979	-0.36	-0.4157	-0.9242	-0.8401	-1.3053	-0.9781	1.0947	-0.845	-1.2801	0.1	-1.6715	-1.3952	0.8643	2.7313	2.0857	-2.1978	-2.0075	0.1168	1.2511	0.8152	2.1108	0.6379	0.8747	0.1735	1.8649	0.4871	0.0476	-1.0432	0.7216	1.1641	0.7092	0.2933	1.0704	0.0145	-1.0372	1.6084	0.5634	0.0165	-0.527	1.3618	1.1892
orf19.6259	RRP43	1.0681	-0.3213	-0.4433	-0.47	0.5069	-0.2277	-0.7547	-0.6611	0.1257	-0.442	0.1372	0.0294	-1.9063	-0.3298	-3.5199	-3.6642	-1.4653	-1.3796	-1.6924	-1.0392	-0.5495	-0.5195	-2.0706	-1.297	0.5867	0.0623	0.1619	-1.8909	-0.8646	-0.972	1.2838	1.1613	0.8874	0.5332	0.0825	-1.0663	-2.2913	-0.9325	-1.1953	-2.8804	-1.6031	-1.2219	-0.5781	0.0517	0.3041	0.5513	-0.3579	-1.062
orf19.5346	TAF8	0.668	1.5492	2.0382	1.5527	0.7019	2.7864	3.1612	1.7053	2.2071	0.9199	1.6525	1.9052	1.7619	-1.009	-0.2912	-0.7368	-0.3383	0.9097	0.5492	-0.34	0.6125	0.1457	0.718	1.1109	1.6953	1.4692	1.112	1.451	1.025	-1.5903	-0.9973	1.0871	2.3853	1.1054	0.9916	-1.2507	0.1939	1.0262	2.2115	0.8259	2.5454	2.8878	2.9735	0.5032	0.0907	0.6919	1.2796	1.0957
orf19.6373	DCP2	0.6596	0.3854	1.2656	0.9388	1.1325	0.2669	1.1391	2.6343	0.4046	0.0007	0.0007	-2.9221	0.98	1.03	-0.549	-0.2162	0.2529	0	0.7609	-0.0805	3.1052	2.7517	0.4646	-0.3741	0.2217	0.3392	0.054	0.8045	0.2593	-1.678	2.4411	2.3038	0.1213	0.5001	1.2544	-0.7906	2.1746	1.1811	0.7998	-1.21	-0.7614	-0.8291	0.0376	-0.8989	0.8198	2.2704	0.3266	-1.2569
orf19.4133	RBA50	0.3574	0.7897	1.5562	1.4526	0.7413	0.8533	2.1793	0.7308	0.7181	0.1025	0.0008	0.0064	1.3083	0.419	0.2042	0.256	-1.1076	0.3692	0.5757	-0.6093	1.3616	1.3433	0.8151	-0.7838	-0.1619	1.7296	0.8299	ND	0.6992	0.5131	0.5982	1.1091	1.6888	-0.4932	0.6312	-1.1714	0.0965	0.555	0.6522	1.1706	0.7705	1.1811	-0.8584	0.8405	1.3239	0.4825	-0.4289	0.287
orf19.3804		ND	ND	ND	ND	ND	ND	ND	ND	ND	0.6817	0.4846	ND	ND	ND	1.0918	0.2715	0.2913	1.0646	-1.5837	1.0597	ND	ND	0.31	0.6662	ND	ND	ND	ND	ND	ND	ND	ND	ND	ND	ND	ND	ND	ND	ND	ND	ND	ND	ND	ND	ND	ND	1.0045	0.0722
orf19.4024	RIB5	0.8615	2.4458	2.2918	1.8071	-1.5028	1.2503	1.4563	1.3559	1.5964	0.7086	-0.5772	2.3076	1.6702	0.1098	0.2342	0.6098	-0.6268	-1.2285	-1.3664	1.0581	0.1826	0.9576	-2.1448	-0.2913	1.1391	3.2484	1.9082	0.6421	1.1834	0.6621	-1.015	0.6141	1.1053	-0.3381	1.6827	-1.7829	-0.3794	-0.7148	2.0251	0.4286	0.7765	1.3401	3.0084	0.4397	-1.201	2.5579	0.6199	0.3589
orf19.1419	SEC15	-0.4397	0.7055	0.1368	0.7737	-0.181	0.9445	2.5404	0.3401	0.3086	0.6368	0.5125	-0.1554	1.4487	0.517	0.1079	1.0316	-2.3021	-1.151	0.2993	1.2106	2.9567	1.5632	0.1246	1.4641	0.6371	0.806	0.2761	-1.1986	0.734	0.0722	0.3057	0.9557	0.6833	-1.0026	-0.8285	-0.1864	1.5238	0.5446	0.96	0.4988	1.5613	1.3414	0.2946	0.2434	-0.521	-1.6013	0.9272	1.1766
orf19.7413		0.284	0.2172	0.1334	0.5282	0.1175	0.9071	0.8884	0.6738	-0.7484	0.7919	0.0416	0.5941	0.7276	-1.2548	0.365	1.4486	1.6299	2.4748	0.7265	2.0321	1.1435	0.7468	0.0076	0.6969	1.273	0.2808	0.1885	-1.1507	-0.7454	-0.353	0.984	0.904	0.6636	-0.4775	1.5689	1.649	-0.5391	-0.4425	-0.8653	0.5434	-0.0939	0.3329	0.3237	1.4482	-0.2643	-0.8767	1.493	1.1648
orf19.1988	CDC45	ND	ND	ND	ND	ND	ND	ND	ND	ND	0.4971	0.5397	ND	ND	ND	0.1951	0.1446	1.1508	-0.4068	0.7256	0.0172	ND	ND	-0.6901	0.7738	ND	ND	ND	ND	ND	ND	ND	ND	ND	ND	ND	ND	ND	ND	ND	ND	ND	ND	ND	ND	ND	ND	0.2498	-0.4291
orf19.2594	RPA43	0.7589	0.0833	0.1398	0.1438	-0.2089	0.2461	-0.3156	0.3743	0.0967	0.6259	0.9947	0.7009	1.0892	0.4746	-0.8606	-2.0743	0.0021	1.0031	-2.3547	0.2081	2.664	1.8463	-1.8485	0.1428	-0.332	0.4639	0.0814	-0.6961	-2.4332	-1.7043	-0.492	0.3076	-0.5619	0.3131	0.3514	0.0946	-0.4872	-1.0634	0.0074	1.2899	0.8667	0.1923	0.0684	0.3689	0.0757	0.1295	1.4582	0.6179
orf19.674	CWC2	0.3338	-1.0323	-0.8077	-0.4466	0.2329	-1.4617	0.1334	-1.3416	-1.1027	0.0008	0.0008	0.3452	1.427	0.8304	-0.7348	-1.4814	0.1311	-1.8225	-0.2274	-0.3913	3.0738	1.9251	-0.7631	-1.8052	-0.4663	-0.6831	-0.304	1.4693	0.1402	-2.4024	-0.9111	-0.4002	-0.2602	0.7027	-0.9772	-0.7113	-1.6724	-0.9788	-1.1249	-0.1693	-0.3416	-0.5023	-1.124	-0.8237	-1.0189	-1.3506	-1.6766	0.5937
orf19.4258	FIP1	ND	ND	ND	ND	ND	ND	ND	ND	ND	-0.4545	-0.3669	ND	ND	ND	0.1329	-0.7203	-1.1319	-0.5865	-0.3285	0.5023	ND	ND	-0.6524	-0.7854	ND	ND	ND	ND	ND	ND	ND	ND	ND	ND	ND	ND	ND	ND	ND	ND	ND	ND	ND	ND	ND	ND	-1.2325	-1.4112
orf19.410.3	RIB4	1.8296	-1.2735	0.4374	0.4052	1.578	-1.6033	0.0583	-1.0692	0.5733	-2.265	-1.5036	-1.0382	-2.4734	0.9204	-0.7551	-0.4906	-0.2118	0.448	0.4356	-1.426	0.0776	0.6153	-1.0418	-1.2978	-0.9889	-1.0912	0.5457	0.0533	-0.7384	-1.072	0.6243	1.0835	0.1212	0.3569	-0.3681	-2.0735	1.3701	1.2878	2.0012	-1.2975	-1.2983	0.0476	1.028	-1.8273	-0.8937	0.7711	-0.9728	-0.1277
orf19.5835	RRP7	0.9077	-0.9763	-1.0232	-1.3301	0.2666	-0.2881	1.1511	0.6742	-0.867	0.5992	0.2985	-0.5587	-0.9615	2.2483	0.3233	0.207	-0.1216	0.2287	0.0118	-1.7981	2.7251	1.5333	0.0185	0.5679	-0.1818	0.0313	-1.9777	-1.3041	-1.1501	0.0924	2.3503	1.797	0.8064	1.5158	-0.755	0.5057	0.2692	-1.8654	-1.1119	1.0995	0.2654	-2.0952	1.6677	1.9769	0.8931	0.4928	0.8131	-1.3533
orf19.3898	TLG1	1.2125	0.5612	0.1276	1.0771	0.2248	1.4417	1.6115	1.4485	-0.3044	2.3662	2.1714	0.1801	-0.5852	0.9823	0.3288	1.2919	0.5234	1.1123	0.8688	1.0829	1.2296	1.8373	0.6547	0.9512	1.0015	0.2327	0.1397	0.3331	0.7242	0.3454	-1.3167	0.1982	1.7548	0.9069	-0.3396	-0.2707	0.5776	1.1553	0.051	-0.213	0.9215	1.0274	0.2314	0.6672	-0.9125	0.2484	0.5297	1.4905
orf19.4871	ERO1	-1.5157	-1.8157	-1.5328	-0.992	2.3162	-0.1546	-2.8141	1.1056	-0.2042	0.8481	0.5893	-0.5442	-1.644	-0.8346	-0.8557	0.3233	0.9991	-0.9059	-0.9842	-0.9224	0.5767	0.6403	1.4804	-0.6318	0.5764	-1.2007	0.2152	ND	-1.2153	-3.5082	2.3071	0.2106	0.2871	0.4735	0.5722	-1.7502	-2.0851	-1.5256	-1.7644	-1.0665	-0.7411	-0.2849	0.1903	1.4299	0.4157	-0.7932	-1.6413	1.2401
orf19.275	POP5	-0.9554	-0.9115	-0.5636	-0.5691	0.2176	-0.9028	-0.3825	-1.4485	-1.0677	1.0088	0.3751	-0.9088	-0.2793	-1.3695	0.4633	0.0963	-0.2284	0.1643	0.2041	0.4034	-1.555	-1.089	0.5235	1.1726	-0.8548	-1.0124	-0.3615	0.3708	-2.4866	ND	-1.4451	-1.6064	0.1579	0.1946	0.4687	1.5642	1.3787	0.8358	-1.26	0.8248	0.5895	0.7258	1.3758	-0.4535	-1.8333	-1.4709	-1.2911	0.1207
orf19.500	GCD10	0.3184	-0.7524	0.1787	-0.398	1.3292	-0.5219	-1.0314	0.6513	-2.6052	0.7183	0.0951	-0.8272	-0.6441	1.4511	1.1715	0.1237	0.2919	1.2611	0.6718	0.5703	0.3604	-0.2723	0.8044	0.4772	-1.3692	-1.3998	0.0076	0.3245	-1.4125	0.6268	2.0014	1.0933	-0.7132	1.8563	-2.3477	0.0372	1.1106	0.7233	-0.4375	1.0484	1.0975	0.9167	0.3143	-3.1502	-1.1421	-0.227	-0.4881	0.7307
orf19.7011	RRP12	1.1576	0.5883	0.5111	0.3246	0.2165	0.4984	-0.4802	0.2394	1.4208	0.0008	0.0008	-0.6829	0.7443	-1.0903	0.7288	0.5725	0.3835	-0.8176	-0.7496	-0.7661	1.9814	0.5243	-0.917	-0.7318	-0.4374	0.0782	0.2713	-0.9131	0.7919	0.135	-1.2993	0.1513	-0.4533	1.9145	0.1804	0.5537	0.1916	1.1138	-2.0988	0.2854	0.3119	0.5004	-0.6787	1.3098	0.0024	0.5016	0.5466	0.0541
orf19.512	KRE33	-0.1125	-1.2549	-0.5824	-0.2783	0.4685	0.4544	0.6286	0.4437	-1.2181	0.2617	0.8127	0.7189	-0.7215	-0.7469	0.9218	0.3607	-0.3283	1.158	-1.039	0.7358	-1.278	-1.6493	0.1683	0.9143	-0.9519	-0.3447	0.511	-1.3647	-1.0828	-1.017	0.8465	0.176	0.2945	1.1675	0.0832	0.018	-1.1681	-0.8083	-0.2904	0.4336	-0.4907	0.4866	0.184	1.0115	0.6899	-2.2675	-0.8399	-0.2194
orf19.5963	YDL193W	-0.4117	-0.4766	-0.462	-0.8117	0.4748	-0.3172	-0.8403	0.1846	-0.7918	0.0008	0.0008	-0.6394	1.3533	-1.8647	-0.373	-1.1989	-0.9015	-0.9303	-1.2103	-0.3843	-0.4519	-0.6649	0.0608	0.1308	-0.8051	-0.7314	0.6627	2.2909	4.2835	2.6334	0.8684	0.0225	-1.0149	1.5065	0.815	-0.9486	-1.215	0.3421	-0.8182	0.2589	-1.0524	-0.7388	0.8373	1.4819	0.1433	-0.4359	-1.5011	-0.8839
orf19.7631	SLD5	ND	ND	ND	ND	ND	ND	ND	ND	ND	0.0007	0.0007	ND	ND	ND	0.6831	-0.6673	1.6244	2.8496	1.9749	1.6316	ND	ND	-0.74	-0.6472	ND	ND	ND	ND	ND	ND	ND	ND	ND	ND	ND	ND	ND	ND	ND	ND	ND	ND	ND	ND	ND	ND	2.7441	2.1468
orf19.7154	UTP18	0.8326	3.4332	3.3782	3.5921	0.2648	3.4088	2.4557	3.3619	2.9234	0.3306	0.6186	2.1592	2.2093	2.4948	1.0301	0.7631	0.57	1.202	0.9086	0.8378	1.0933	0.683	-0.9772	0.4835	2.0334	1.8215	1.6623	0.7799	0.8474	0.7446	0.9287	2.0612	2.1118	0.2886	-0.6479	-2.1975	1.3321	0.1331	1.2779	-0.5331	1.3225	1.4827	-0.6378	-1.736	0.8914	-0.9983	0.2197	1.1451
orf19.7358	SAM50	ND	ND	ND	ND	ND	ND	ND	ND	ND	-0.5684	-1.058	ND	ND	ND	2.413	0.9328	-0.5164	0.8402	0.3678	-1.4999	ND	ND	0.6551	-0.833	ND	ND	ND	ND	ND	ND	ND	ND	ND	ND	ND	ND	ND	ND	ND	ND	ND	ND	ND	ND	ND	ND	0.132	0.7136
orf19.680	TIM50	-1.1328	-1.4938	-1.6535	-1.0504	0.0125	-1.2866	-0.879	-1.1191	-0.1268	0.8469	0.862	0.3878	-0.6101	-1.6868	-0.7769	-0.8459	-0.5838	-0.1213	1.7088	-1.2695	-1.5584	-1.4313	0.3165	0.5387	0.3824	-0.8061	-1.5499	2.036	0.47	0.298	0.9901	-1.1143	-1.4219	0.6362	-0.8842	0.8157	0.2892	0.1084	0.099	1.013	-0.6638	0.0528	0.4654	0.44	-1.3502	-1.9879	0.1242	0.9155
orf19.1026	CSL4	0.266	-1.0914	-0.4188	-0.4935	-0.0649	-1.4693	-0.9728	-1.3155	-1.4495	-0.7431	-1.2077	0.4932	0.4011	-0.8479	1.4878	-0.2744	0.3414	1.047	0.7154	0.4939	-0.8632	-0.6461	-1.3423	-1.3317	-1.8399	-1.0545	-0.5955	-1.0264	-1.6492	0.0468	-2.6365	-1.0274	-2.0437	0.2912	0.2816	0.3582	0.0975	0.2742	-0.4884	0.1867	-0.6047	-0.3566	0.7701	0.1168	-0.7435	-1.712	-1.3142	-1.3572
orf19.4232	YGR046W	-0.4928	-0.7824	-0.2586	0.2592	0.7571	-0.2415	0.0468	-0.2946	0.0178	0.5129	1.4263	-1.1593	1.1654	0.5397	-0.1001	-0.1479	0.0329	0.9019	-0.9747	-0.9525	-2.0149	-1.6331	1.6702	0.7657	-0.9725	-1.4401	-0.9674	1.6111	-0.7209	0.8888	1.2811	-1.6192	-1.0776	-1.3312	-0.5113	-1.517	0.8124	1.4799	-1.3368	0.1528	0.3275	0.781	-1.9398	-0.7681	0.3253	-1.324	-0.7526	0.8476
orf19.1458	TAD2	0.9584	0.1271	0.615	1.1473	0.6198	0.9553	0.7937	1.8031	0.9877	1.4182	2.0668	1.1657	0.9728	0.7901	0.2929	0.2194	-0.4911	2.159	1.7146	1.9348	0.0641	-0.4011	0.717	0.2572	0.9375	0.9811	0.4289	-1.0505	0.7191	-0.1356	-1.1985	0.4574	1.3271	0.7338	1.1318	1.6699	1.959	0.104	0.0928	0.0524	0.8885	0.9053	1.4226	1.3265	0.3019	0.4746	0.5278	0.8246
orf19.3161	ESF2	ND	ND	ND	ND	ND	ND	ND	ND	ND	0.6868	0.8013	ND	ND	ND	1.6191	0.5139	0.7058	-1.2019	-1.1012	-1.6036	ND	ND	0.5465	1.0714	ND	ND	ND	ND	ND	ND	ND	ND	ND	ND	ND	ND	ND	ND	ND	ND	ND	ND	ND	ND	ND	ND	-1.4362	0.143
orf19.6648	SDA1	-0.8642	-1.2114	-0.4733	-0.484	0.2357	-0.7361	-1.0132	-1.3923	-0.6482	-1.579	-1.6973	-1.2042	-0.2488	-1.0178	0.0958	-1.5667	1.185	1.6189	-2.2872	0.6222	-0.8181	-0.3077	-1.1806	-1.1475	-0.5788	0.4373	0.614	0.441	-1.5616	-1.2211	1.317	0.3398	-0.4234	0.0116	0.5531	-0.9918	-0.6093	-0.5776	0.2382	0.3734	-0.9919	-0.5216	0.8191	0.5756	1.325	-1.1434	-1.7027	-1.4822
orf19.4221	ORC4	0.2802	0.2003	0.2174	0.8418	-0.5848	-0.7918	-0.3842	-0.5577	0.1759	-0.6446	0.0284	-1.75	-0.52	1.6201	-1.5763	-0.7517	-0.6098	0.1833	1.4302	-1.1679	-1.4173	-0.6985	-0.8481	-1.104	-1.9655	-1.268	-0.9224	-1.2806	-0.6587	-0.958	-1.2105	0.8845	-1.6778	-1.5672	-2.1565	-0.4383	0.3834	-1.5139	0.1887	0.8365	-0.3287	1.2995	-0.4086	0.1242	-1.4726	-0.4978	-0.962	-0.8838
orf19.7420	MED6	ND	-0.527	1.0806	0.6711	-0.9556	1.2491	2.4943	1.9856	1.0144	1.2775	1.0246	0.7108	-0.3124	-0.4185	1.7432	0.2967	0.8609	1.4591	2.1966	1.3449	-0.3725	0.2328	0.4952	0.5323	1.3153	1.1529	-0.7217	0.7638	0.9463	1.6161	0.4642	1.3999	1.3237	-3.0818	-1.7053	0.5098	2.3199	-0.32	0.6357	1.8311	2.2678	1.6742	1.2069	1.0437	-0.5719	-2.1882	0.166	1.5832
orf19.7227	YPI1	0.7973	1.2186	1.2554	1.2634	0.4327	0.5723	1.2632	0.5002	0.6649	0.0007	0.0007	0.9011	1.477	0.189	0.2595	-0.6948	-1.439	0.5907	-0.9792	1.0761	3.782	3.0725	0.4787	0.4046	1.0016	1.762	1.0382	2.4098	2.2107	0.2198	-3.3673	-2.2115	0.0195	0.3289	1.1418	-1.8143	0.6102	0.917	1.3456	0.2351	0.4341	0.684	-0.6981	0.0824	-1.1374	2.9885	0.8213	-0.4606
orf19.3553	RPF2	0.1022	-1.0835	-1.3642	-0.9075	1.9545	0.4729	0.7483	0.1989	-1.4631	0.1931	0.2748	-0.5845	-0.8709	-0.3702	-0.3467	-1.0789	0.0591	1.0269	-0.671	-0.8031	-0.5586	-0.7591	0.1718	0.1114	0.2935	-0.2272	0.7155	-0.9262	-0.9891	-1.3525	2.2452	0.4343	-0.622	0.851	1.1269	-0.3389	-1.6175	-1.2772	0.8716	-1.6425	-1.7735	-2.1625	-1.0757	0.438	1.8867	-0.9283	-0.7182	0.2083
orf19.4757	NAR1	0.9528	-1.4319	-0.5029	0.4443	0.4661	-1.4064	0.0146	-1.1998	-0.7765	-1.0088	-1.3692	0.177	-0.8781	-1.8024	-0.9757	-0.4163	0.4661	-0.9675	0.3904	-1.4519	0.2106	0.0033	-0.7079	-1.7778	-0.5486	-1.0466	-0.2853	-0.2974	-0.7969	-0.474	-1.371	-0.4142	-1.5947	0.8233	0.8573	-1.3114	1.357	0.2465	1.2592	-1.0865	-1.3812	-0.1407	0.2738	-1.3814	-0.5034	-2.0975	-0.512	0.1848
orf19.5268	NUT2	0.8572	1.1856	1.8463	1.9093	0.7901	0.0192	-1.5184	-1.2304	-2.9375	-1.2567	-1.3883	0.7889	-0.8572	0.5562	-1.355	-0.5624	1.2905	0.5361	1.397	0.9384	-0.9954	0.4157	-1.5476	-2.4255	-2.4048	-2.9497	-1.1001	0.1347	1.2948	2.208	0.3861	0.749	-0.7845	0.1304	-1.1846	0.5479	0.9018	1.5362	0.0148	0.597	0.8659	2.4587	0.4938	-1.4681	0.1533	-0.2684	-0.7552	-0.3845
orf19.2386	UTP11	-1.0248	-0.4598	0.585	0.3673	0.96	0.5818	-0.5485	0.2811	-0.7418	0.0776	-0.511	-0.7354	-1.287	0.4208	-1.6887	-0.7287	1.4669	0.0603	0.2933	0.3265	-1.2439	-0.864	-1.0551	-0.3624	0.0907	0.0785	0.544	-0.9965	-1.2865	-0.9943	1.2156	1.2396	0.1203	0.1502	0.9698	-0.973	-2.082	-1.5422	-1.2872	1.0151	-0.5515	-0.3585	-0.5341	-0.628	0.0169	-0.5441	-1.1744	-0.7671
orf19.4190	PAM18	2.2695	0.6274	0.0604	0.1381	0.3553	1.4505	-0.443	-0.9371	0.7095	0.0369	0.0008	0.2365	0.9894	-0.9972	0.76	0.1133	1.2574	0.7334	0.842	-0.6383	0.3091	-0.8362	-1.1076	-0.5114	0.6446	0.4853	0.6199	-1.3833	-2.4557	-0.4523	-2.6717	-1.7271	0.9147	1.4687	0.8885	-0.6061	ND	ND	0.6779	0.4664	0.9362	0.1664	1.3228	1.8821	0.1394	0.1006	0.4274	0.6598
orf19.3304	RRP40	1.9467	0.117	0.3389	0.0247	1.4147	0.6031	1.9509	0.6944	-1.1869	0.0008	0.0008	0.3412	0.7838	0.1892	0.195	0.2674	0.1305	0.4967	-1.1882	1.4876	0.638	-1.4211	-0.7769	0.0683	1.1292	1.6322	-0.9279	2.2301	0.6464	1.1607	0.3394	1.5168	0.6187	0.7748	3.563	-0.6386	ND	ND	ND	2.217	2.9484	-0.6273	0.2006	1.0498	ND	0.2343	0.5687	0.6713
orf19.3293	TSC13	1.371	1.0855	1.825	1.9086	1.5669	0.8791	0.7477	0.2872	0.4121	-0.7539	-0.9223	1.3507	1.6059	1.8627	-0.5487	0.4466	0.5252	-0.6021	1.9586	1.7935	0.473	0.2059	-1.1734	-1.1215	2.184	0.4762	2.0478	0.1856	0.8803	1.5852	-0.9675	1.1524	1.3788	0.0608	0.5175	0.7172	1.1809	2.5787	0.2261	1.0511	0.8333	1.0919	1.5471	-0.4285	1.3765	0.3546	1.2173	0.318
orf19.7615	TRS31	ND	ND	ND	ND	ND	ND	ND	ND	ND	0.4387	0.5607	ND	ND	ND	1.6478	0.0273	2.8765	0.8253	0.5529	2.747	ND	ND	-2.8121	-1.111	ND	ND	ND	ND	ND	ND	ND	ND	ND	ND	ND	ND	ND	ND	ND	ND	ND	ND	ND	ND	ND	ND	1.7442	0.6444
orf19.3585	YNR046W	0.0919	-0.4919	-1.1918	-1.8268	2.5105	0.6273	0.3526	-1.7042	-0.8579	1.4715	1.4151	1.193	0.4014	-0.685	-0.7162	0.812	0.9971	0.8107	1.2071	1.122	0.2172	0.866	1.5282	1.2382	-0.8778	-2.27	-0.6639	-0.2257	0.1847	0.6023	-0.5844	0.0562	0.3646	1.228	0.3682	1.3594	-2.0669	0.1437	-1.5845	-0.5306	-0.3496	-2.7694	1.7789	1.3855	0.8046	0.1554	0.5491	0.9822
orf19.910	PRP3	1.2685	-1.4619	0.5663	0.8983	0.5004	-1.0308	-1.0454	-1.9587	-1.5961	-0.7222	-1.1588	-1.2087	-0.8474	1.418	-0.5713	-0.3687	1.6927	0.4662	0.4086	0.0083	0.678	0.7338	0.1696	-1.3333	-1.7509	-1.2054	-1.43	-1.6892	-1.1523	0.0567	1.221	0.4298	-0.9737	0.9035	0.7783	0.66	1.2129	0.1531	-0.7576	0.4376	0.2754	0.44	-1.3126	-1.5631	-2.1125	-0.9788	0.6022	0.0649
orf19.2884	SPT16	ND	ND	ND	ND	ND	ND	ND	ND	ND	1.0407	1.2172	ND	ND	ND	1.9313	1.0114	-0.8697	-0.7114	0.25	-0.6025	ND	ND	1.3881	0.7061	ND	ND	ND	ND	ND	ND	ND	ND	ND	ND	ND	ND	ND	ND	ND	ND	ND	ND	ND	ND	ND	ND	-0.2557	-1.2504
orf19.2667	RPF1	0.5527	-1.2688	0.3643	0.2728	0.8187	-0.9499	-1.2281	-1.8339	-0.68	-0.9011	-0.7405	-0.8169	0.7367	0.6059	0.3678	-1.2664	-0.5747	1.0677	0.6756	-0.6423	0.6525	0.4577	1.2382	-1.194	-0.9225	-0.7999	-1.0974	1.9806	0.0347	0.1471	0.2586	-1.4725	0.0815	0.2336	0.9826	1.2902	1.5256	0.97	-0.4621	0.3892	-0.4384	-0.4124	0.503	0.0635	-1.4008	-0.6885	0.0188	0.1682
orf19.544	RPR2	0.2311	-1.1055	-0.2399	0.3269	0.6469	-0.7097	-1.143	-0.8977	-0.1626	-0.5466	-0.8292	0.3407	0.0247	-1.3074	0.1509	-0.7809	0.2159	-0.318	0.3233	0.6756	0.4764	0.5737	-0.5601	-0.6551	0.1082	-1.1495	0.1692	0.0606	-1.5913	-0.6041	0.6395	0.749	0.1647	0.9084	-1.086	-0.7534	1.0286	1.4149	0.3628	0.7302	-1.3431	0.2876	0.0459	-1.3753	0.6779	-1.3683	-1.2908	-0.6703
orf19.3531	YOR060C	0.851	-0.4803	0.0697	0.2114	-0.3638	-1.0707	0.2918	-1.1217	-1.9587	0.0007	0.0007	0.3116	1.0856	-0.6017	-1.1608	-0.9395	-0.3664	-1.2522	-1.182	-0.8908	0.2553	0.4554	-0.3542	-1.0997	-0.467	-0.3582	0.6934	0.3509	-1.5376	-1.824	-1.3631	0.2497	0.2969	-1.92	1.084	-1.7028	0.3311	0.1821	0.7777	-0.4486	-0.6407	0.1939	2.3343	-2.2295	0.894	-1.2967	-1.526	-0.9218
orf19.6862	RIX1	0.2693	-0.3847	-0.4496	0.2551	-0.9942	-0.4432	-0.7567	1.3179	0.7533	0.0008	0.0008	0.2754	0.7614	0.4017	-0.7521	-0.5972	0.2751	0.3018	0.066	-0.1944	-0.9207	-1.1037	0.1912	-1.1401	0.1711	0.413	0.6583	0.2313	0.5023	0.6301	1.0578	0.5223	1.173	1.3416	2.5544	0.4524	-0.4257	-1.3583	0.7061	0.2635	-0.8443	-1.1613	0.6875	1.6844	1.5051	-1.179	-0.5145	0.2531
orf19.232	MED7	0.4195	0.3827	0.8321	1.0558	-0.8503	-1.5204	-1.2804	0.5232	-0.6677	0.0007	0.0007	0.2333	0.6657	0.1936	-2.3312	0.0286	0.2129	0.1453	0.1862	0.6311	0.2419	0.5805	0.0671	-2.0818	-2.3157	-3.4007	-2.1333	0.9836	1.1857	1.3109	-0.8084	-0.9508	-1.154	0.3343	0.6136	-0.3254	1.6574	0.8319	-0.7265	0.2839	2.7236	2.2762	0.2181	-1.289	0.2537	-0.5415	-0.5852	0.6531
orf19.979	FAS1	0.4158	0.052	-0.9278	-1.09	-1.1466	0.1828	0.6649	0.1039	0.2415	1.1805	1.174	1.5678	1.0011	-0.4649	-0.6356	0.5937	-0.9439	-1.024	-0.4688	-1.1432	0.2124	-0.9596	-1.1399	0.1885	11.7545	11.6413	11.5213	-0.7741	0.3742	-0.4333	-0.3633	1.7185	1.9338	0.8406	0.541	0.6237	-1.1974	-0.5074	-0.3382	0.0639	-0.3038	-0.7964	-0.4031	1.7297	0.8761	0.2338	0.7948	0.1127
orf19.1622		0.6429	0.3613	1.7863	1.1631	0.9587	0.9669	-2.6722	1.0786	-2.0138	0.0008	0.1187	0.8903	1.3829	0.8375	0.2599	0.0868	-1.9559	-1.0458	-1.5365	-0.668	0.5817	0.2958	-1.1286	-0.78	-0.5193	1.5244	1.0278	-1.3236	0.4726	0.1212	0.1913	1.4616	0.2579	0.6459	0.1356	0.5096	2.0923	1.7648	0.7512	0.9513	1.0562	0.7039	1.675	0.2356	-2.9284	-1.4931	1.2496	0.7782
orf19.5163	SFI1	0.7198	0.6644	1.1563	1.896	-1.8749	1.1275	1.2386	3.3928	1.3344	1.063	0.6715	1.7919	1.1639	-1.6025	-0.2155	-1.2085	1.8296	0.4132	1.7954	-1.5391	-0.5792	1.2323	0.0487	0.1178	1.9255	0.464	1.5512	-1.058	-0.9155	1.3793	0.4438	0.0863	0.6084	-0.5274	1.4384	0.8495	1.4426	2.4978	0.3405	0.9713	1.0338	1.4388	0.0679	-0.3804	2.1228	-1.6193	0.6553	0.3278
orf19.3409	SED4	1.2886	0.0154	0.4442	0.77	0.9173	1.4913	2.2685	2.3364	0.854	1.2564	2.0578	1.3223	0.096	0.8678	0.09	0.9682	-0.8877	0	-0.7659	-1.1216	-0.7089	-1.1702	0.8352	1.6774	0.6044	0.1727	0.4198	1.3196	1.5608	1.7705	0.1951	0.1594	0.1819	0.2238	-0.8528	-2.0911	0.8164	-0.4393	-0.7589	2.346	1.0222	0.7117	1.4168	-0.7134	0.3736	0.6259	0.7931	0.4286
orf19.718		0.7092	-1.2174	-0.9667	-0.6304	0.9017	-0.9675	-1.6258	-0.6554	-0.6535	-1.3884	-1.8403	0.0384	-1.7276	0.1466	-1.0789	-1.1207	0.3003	-1.1544	0.9354	0.217	-0.7491	0.5892	0.0303	-1.0168	-0.7905	-0.2687	0.1619	0.3625	-1.1424	-0.7277	0.221	0.8645	-1.335	0.9674	0.2322	-1.965	0.3357	0.9244	0.5534	-0.8849	-1.3771	0.4168	1.143	-2.1622	1.5368	-0.3203	-0.7698	-0.6777
orf19.581	NRD1	-0.9691	0.7052	0.9691	0.9456	-0.9491	1.0447	1.0794	0.025	0.8111	-0.5807	0.0988	1.3602	0.6614	-0.6994	0.5343	0.0581	2.1758	1.721	2.5759	1.6635	2.1116	1.6891	0.6704	0.1332	0.3171	0.3793	-1.0351	2.4644	1.2735	1.1144	0.844	-1.3012	0.1465	0.2688	1.6533	-0.6124	-0.6227	1.3206	0.593	0.2286	0.2112	0.33	0.4397	1.1195	-0.9233	1.6914	-0.1358	0.0455
orf19.2688	NAN1	0.1706	-0.591	0.0728	0.0283	0.7753	0.0315	0.8273	-0.4224	-0.8666	-0.8302	0.1036	-0.3855	0.4778	0.4684	-0.9811	-1.9302	-0.8451	-0.3722	-1.0132	-0.7331	-1.0198	-0.9801	0.4853	-1.4293	0.913	0.8759	0.9763	-2.1158	-0.9527	-0.9555	0.3864	0.1385	-0.6122	-1.0766	-1.0442	-0.6642	-0.6479	-0.5824	0.5393	0.6735	0.9349	1.0078	-0.8269	0.0228	-0.8679	-0.3866	0.6357	0.2747
orf19.7197	NOC3	-0.4855	-0.3145	-2.5449	-2.8134	-1.5474	-1.0997	-0.7909	-0.7171	0.8724	-0.2644	-0.6988	-0.62	0.0403	-1.3665	-0.3265	-1.4949	-2.9257	-3.5253	-4.4876	-2.7365	0.3972	0.4178	-2.0906	-2.3556	3.7043	3.5329	4.0773	-0.8935	-1.1938	-1.6528	0.0758	-1.7355	1.005	0.7911	1.2045	-1.1151	-0.7843	-1.1062	-0.6575	-0.4944	-0.8933	-1.2107	-1.0677	1.5851	1.0447	0.9473	1.3371	0.8893
orf19.5765	NUP82	0.1636	2.38	2.1104	1.8803	-0.9298	2.9604	1.3253	1.4272	1.9884	-1.14	0.014	1.7682	1.8204	0.177	1.6163	-0.2195	-1.2128	0.9005	0.2917	1.8311	0.4831	0.9096	-1.2647	0.5004	2.1628	1.7722	1.4366	0.6583	1.4859	0.7022	0.2962	0.3875	1.3622	0.4064	-1.3103	-1.7032	-2.2745	-1.5804	0.9651	0.4928	1.1972	1.5741	1.7624	1.594	1.7702	0.2161	-0.9052	0.6126
orf19.4348		1.2492	1.2113	0.9797	1.265	0.3236	0.846	-0.4099	0.7594	-1.416	0.2179	0.123	0.389	0.0996	-0.7218	-1.6536	-1.0057	0.0908	-0.0345	-0.3751	-0.7565	-1.6286	-1.1955	-0.3823	-0.5649	0.7471	1.7073	-1.5171	2.1003	1.1965	2.2993	0.7035	0.8363	1.0369	2.1127	1.3656	0.8222	ND	ND	ND	0.2216	3.2584	2.7747	1.7824	0.8649	ND	-1.8995	0.2159	-0.3404
orf19.6544	YPL137C	0.3594	1.5906	2.2506	1.8893	1.3982	0.3392	0.8688	1.3438	-0.7608	-0.662	-0.5027	-0.8662	0.6741	0.3728	0.2245	-0.1269	-0.5405	0.3244	1.2997	0.5508	0.1902	0.7931	0.7744	-0.5577	-0.2159	1.0408	0.6851	-1.1	-0.454	1.2722	1.5946	1.4708	1.7311	1.0683	0.3969	1.0847	0.5533	0.3304	1.19	0.4856	0.8712	1.396	0.5929	-0.4396	-0.2959	-1.949	-0.8311	1.51
orf19.3833	TFC3	0.7042	-0.9444	0.3726	0.3823	-0.326	-1.4925	-0.8537	-1.0321	-1.5288	-1.2041	-0.9444	-2.225	-1.4824	0.614	-2.2768	-1.1544	-1.7833	1.3933	-0.8242	0.4185	-0.7419	-0.6934	0.3068	0.1829	-0.8403	0.1526	0.5418	-1.5758	-2.3447	-0.9807	0.4089	-1.0642	-1.5724	2.4451	-1.8979	-0.2861	0.6624	-0.3652	-0.4446	0.1385	-0.3573	0.3447	0.3376	0.1352	-0.9833	-1.3327	-1.3135	-1.6906
orf19.4203	NDC1	-0.3171	2.446	2.1724	1.7941	-0.653	2.0637	2.1068	2.0971	1.792	-0.5137	0.0803	1.518	0.4485	0.1645	-1.5266	-1.3818	0.6973	0.3063	0.2926	0.6809	0.8543	1.3194	0.2167	-0.4982	2.1406	2.3445	2.2771	0.8901	1.1063	1.3071	-0.7241	0.8891	1.7541	1.4873	0.7169	-1.4537	-0.7847	-0.6558	-1.0424	0.0928	0.7539	0.9274	1.7362	1.3399	0.7107	0.4699	1.1413	0.6207
orf19.4928	SEC2	2.0314	1.3393	0.4648	0.496	1.4518	1.112	0.7607	0.6744	1.0437	0.0008	0.0008	0.7929	0.7155	1.0936	-0.9191	-0.4698	-3.0872	1.2531	1.3053	-0.3119	0.8924	0.4956	-0.2136	-0.5465	2.0378	1.511	1.6384	2.7655	1.3798	1.3264	0.9814	1.1981	1.1059	1.656	1.6733	0.1392	-0.9406	1.62	0.6754	0.9014	0.6619	0.2947	-0.962	0.5787	-0.6468	0.6036	0.783	0.1535
orf19.4863	PDC2	0.0389	0.8242	0.9364	0.7994	0.0546	0.3512	0.8647	1.1842	0.8336	0.0008	0.0008	0.3466	0.3982	0.1973	0.4323	-0.4998	0.3578	0.0022	-0.3385	-1.0145	0.7591	-0.8004	-0.8103	-1.287	0.7595	1.0482	1.1455	0.2486	0.5218	0.2531	0.5022	0.7305	0.4702	0.6653	1.207	0.745	0.4781	0.9174	0.4292	0.4732	-0.4701	0.4921	-1.0598	0.304	0.1863	-0.113	0.2455	-0.1607
orf19.3256	SLN1	0.5735	0.6377	1.2349	1.117	0.094	0.833	3.1313	0.4261	0.4618	0.6114	0.7384	1.3161	0.9408	-0.7226	-0.8196	-0.8072	-0.514	-2.1401	0.4751	-1.3879	-0.7509	0.5413	-0.556	1.0135	0.3381	1.1564	0.8481	1.3016	0.5808	0.5782	-1.3453	0.7802	0.7699	1.4839	0.8464	-0.2903	0.0909	1.15	1.1387	0.9684	1.0325	-0.3277	-0.5014	0.5463	-1.0402	0.71	1.652	-0.3581
orf19.1589		-1.7769	-1.5797	-0.4606	0.2092	0.5873	-1.1522	-0.991	-1.2049	-0.1625	0.3779	0.7587	-1.6712	-1.7668	0.5676	-1.0491	-0.7164	0.9044	-1.1812	0.289	1.01	-1.5836	-1.0528	-1.5805	-1.0212	-0.6395	-0.307	0.5042	-1.3874	-0.4759	-1.025	-1.4709	0.7813	-1.5829	-1.2561	0.0825	1.5543	0.5317	0.6158	-1.5017	1.184	-0.3941	0.1099	0.2052	1.0579	-1.2035	-2.1919	-0.4851	-0.3035
orf19.4448	SOG2	-1.7389	-1.0549	-1.2336	0.1445	0.1391	0.2897	0.7096	-0.846	0.1619	0.2187	0.6262	-1.5099	-1.574	0.3144	0.9126	0.7906	0.7809	0.2568	1.2211	0.3362	0.2685	0.5216	0.6357	1.1079	-0.8371	0.0637	-0.486	-0.4365	-1.228	-2.2774	1.6246	0.2206	0.9324	1.5965	3.4993	0.9662	1.7579	0.3681	0.0468	-1.2999	-0.732	0.2362	-1.0086	1.3013	2.0833	-0.5947	-0.4602	0.1206
orf19.2041		1.1313	1.0901	0.9753	1.544	-1.2743	0.3248	-1.0918	2.1965	1.7913	-1.1599	-1.1154	2.0459	1.5542	0.999	2.5285	3.3128	1.0767	1.5697	1.6735	1.4552	0.4081	-0.754	-1.3896	0.0081	-1.5963	-1.6927	-1.8598	1.3679	1.7668	2.753	2.8748	2.8708	1.3815	0.6746	1.0143	0.4006	2.1147	1.2584	1.9657	-1.2549	1.1354	0.9918	0.4424	0.3665	1.0192	0.9785	1.2991	1.6153
orf19.2507	ARP9	0.443	1.1834	0.329	0.0525	-1.3884	-0.479	-0.8011	0.3371	1.1583	0.983	1.066	1.006	1.6759	0.1845	0.6005	-0.7341	2.5405	1.8904	0.9373	1.6821	-1.4873	-1.3189	-0.5148	1.3313	-1.6792	-1.8093	-2.0009	1.9997	3.342	ND	0.0634	0.8813	1.1918	0.4449	0.4023	0.9466	0.9145	-0.7417	0.6741	-1.5678	0.2304	0.2438	-0.9045	2.6613	0.6283	1.8709	2.7363	2.1487
orf19.7449		0.8587	1.8942	1.325	1.7278	0.6656	1.8353	1.3761	1.3966	1.3159	0.4044	-0.9165	-0.3002	1.1108	1.2273	0.1865	-0.4871	-0.3182	0.0733	0.9183	0.6396	1.3481	1.5948	-1.9698	-1.2373	1.6981	2.4938	1.7999	1.2746	-0.1351	-0.5591	-1.5268	1.6084	1.1653	1.1558	0.9678	1.246	1.706	1.0793	1.4627	0.3006	0.3613	0.5169	1.1718	-1.0181	-0.8731	-0.8106	0.7928	-0.6501
orf19.5356	YNL313C	0.7698	2.9148	2.2758	1.909	0.3235	2.0234	1.4938	1.4656	0.7078	-0.8974	-0.7566	1.366	0.7136	1.0087	-0.2828	0.1391	-0.918	0.1431	-2.3082	0.4711	0.3032	0.8897	-0.9702	-0.8656	2.0895	2.7543	3.3589	-1.877	0.246	0.5224	0.1431	1.5072	1.6053	0.2628	0.6076	-3.1213	0.0808	1.3688	0.3424	0.5131	0.8599	0.9733	-0.7184	-1.5794	1.0665	0.4092	1.7356	0.0338
orf19.1232	VRG4	1.5051	-0.4992	-1.4657	-1.0903	-0.6012	-1.146	-0.9138	0.2431	0.9821	-0.9182	-1.0239	-1.8437	-1.7889	1.1889	0.4384	-0.9775	1.0983	-0.4784	-0.146	-1.0347	-0.9882	-1.0638	0.5015	0.1025	-1.2195	-1.0962	0.3317	0.153	0.2497	0.056	0.005	0.7397	0.5849	0.1439	-0.587	-1.4777	1.0965	0.6829	1.746	-2.5087	-1.2851	-0.9912	-0.4099	-2.1869	0.9451	0.1892	-1.5662	-1.4294
orf19.1609	KRI1	ND	ND	ND	ND	ND	ND	ND	ND	ND	1.0779	0.9447	ND	ND	ND	1.6737	0.3076	0.1751	0.3849	-0.368	0.0035	ND	ND	-1.1016	0.112	ND	ND	ND	ND	ND	ND	ND	ND	ND	ND	ND	ND	ND	ND	ND	ND	ND	ND	ND	ND	ND	ND	0.5374	-0.622
orf19.4290	TRR1	0.7561	0.2866	0.3039	0.5337	1.9849	0.0026	-0.8448	0.0039	-1.0046	-0.2358	0.4878	0.3023	0.1044	0.3501	-0.8862	-1.2409	-0.7939	-2.9334	-1.5342	-2.8374	0.6298	0.5795	0.8574	0.1388	0.9446	0.166	-0.8729	1.4265	0.4207	-1.0746	-0.1889	0.8461	-1.1034	-1.2362	1.2499	1.2717	0.5898	1.308	0.5798	0.1765	-0.4655	0.3374	0.0188	-0.7687	-0.5846	0.3874	-1.2579	-0.1472
orf19.5463	SEC6	1.7451	3.5429	2.2252	2.6661	-1.2919	2.0214	1.7448	1.4631	2.1879	-0.5518	0.8243	1.2046	1.5702	-0.309	0.2217	0.2472	-2.2369	-2.7907	0.0353	-0.3951	0.1919	1.3547	-1.0053	0.34	-2.9552	1.0872	0.33	0.1485	1.2336	1.213	-1.175	1.8794	1.5875	1.6111	0.7955	2.3806	0.4055	1.2301	3.6891	0.1046	0.0975	1.3647	ND	ND	0.8102	0.7511	0.5417	-1.4631
orf19.2847	RPC82	0.5949	-0.5782	-2.0582	-1.2272	0.4965	0.4822	1.0409	-0.4715	0.2122	0.4606	0.1691	-0.8004	-1.7329	-0.5245	-0.72	0.375	0.0269	0.5251	0.6324	0.0315	0.9077	1.212	0.8049	0.2969	-0.5844	-0.7159	-1.0889	2.479	0.6027	0.028	1.511	0.9651	0.9663	-0.4422	-1.4207	0.0468	-3.6266	-2.5892	-1.3031	-1.0818	0.3797	-2.3925	2.2988	1.5582	-1.4878	-0.7518	-0.3461	-0.2777
orf19.1878	MED4	-0.8532	0.9003	0.8674	1.5049	-0.6218	2.026	2.6917	1.9206	-0.906	0.3143	0.4861	1.3134	0.9124	0.707	0.0963	-2.3237	-1.575	-1.9106	-1.8867	-1.5228	1.5055	0.9984	-1.7785	0.142	1.9549	-3.9286	0.2894	3.8446	0.5466	1.8177	0.5623	0.145	0.8982	0.1664	2.0333	-0.3974	0.3749	0.0375	0.7726	0.8726	2.2652	2.6353	0.8329	-1.4897	0.4955	0.3389	0.2395	0.568
orf19.2715	RPC53	-0.3928	0.033	-2.5415	-2.7228	-0.4214	-1.8226	-1.5942	-0.5932	-1.0493	0.2115	0.8506	-0.9327	-0.7271	1.1819	-2.2979	-1.0443	-1.014	-0.6518	-0.8209	0.4241	-0.7072	-0.3334	0.1001	0.0031	-1.4814	-2.2008	-2.045	0.5049	-3.0356	-2.3741	-0.8397	-0.8021	-1.1625	-0.2578	-1.2088	-0.5613	0.1702	-0.3108	0.579	0.8058	-1.6269	-2.6252	-1.1206	0.7365	0.1448	-0.66	-1.6697	-0.2603
orf19.3174	CDC24	0.1503	0.561	0.7813	1.462	0.2641	-0.3566	0.3307	1.1679	0.8592	0.6594	-1.1554	-1.7611	-0.3077	-0.3154	1.1282	-1.5702	-2.7572	0.7773	-0.3427	-1.5202	-0.7687	-0.8456	-0.1899	-1.1541	-1.1039	0.3112	0.8794	0.5404	0.1022	0.689	0.3048	-0.8016	0.8386	-2.1667	-2.3579	-2.4454	0.1866	0.5257	0.5931	1.4211	-0.8558	0.506	0.8069	0.4536	-1.345	-0.4818	0.2657	-0.47
orf19.1574	TAF7	2.1101	-0.3602	1.2054	1.1496	1.1903	0.3692	1.2564	-0.7428	-1.5691	0.8245	0.9794	-1.7491	-1.0977	1.6646	-2.4984	-2.5163	0.6765	1.9276	0.7052	1.7303	0.0013	0.4607	2.0277	-2.1853	1.5771	1.6707	1.6259	1.5532	-1.1333	-1.7453	0.5113	0.2497	-0.9704	-2.26	1.1364	-0.0507	-1.789	0.621	0.5711	1.2488	1.7721	1.8898	0.3947	0.5498	-0.8425	-1.9544	0.5017	0.4791
orf19.5198	NOP4	1.305	-1.6827	-1.0918	-0.75	0.7743	-0.4652	-0.1937	-1.6856	-1.229	1.0924	0.1936	-0.5499	-1.8295	0.4537	0.7717	-0.399	0.4851	0.3523	0.2349	-0.5683	-0.8842	-0.8662	1.7702	0.1175	0.0089	-0.9886	0.4054	0.7836	-1.7815	-1.41	1.7065	0.1742	-1.335	0.4079	0.6735	-0.7359	1.8372	2.0204	0.5661	-1.1933	-0.7442	-0.5569	1.3711	-0.8758	0.1243	0.4263	0.1613	0.3025
orf19.1633	UTP4	1.0704	1.0464	0.1624	0.2202	0.001	0.9872	2.2841	1.8632	0.6182	0.0008	0.0008	0.8515	0.5878	1.1475	-1.1073	0.3271	0.1144	-1.016	-1.0781	-0.2171	-0.389	-0.6159	0.3238	0.1818	-2.2006	0.5919	0.4418	1.2059	0.2827	0.2032	-0.9678	0.6975	-0.344	1.7994	1.9658	0.858	0.5051	0.7121	0.8339	-0.1762	0.7824	0.2654	0.6992	0.8276	1.3105	0.393	-0.4549	-1.1778
orf19.5168	YOL022C	-0.7555	-0.2964	0.0961	0.6883	-0.3877	1.1596	0.7179	0.5941	-0.3024	0.4015	1.1079	1.8477	2.8427	2.1965	1.4443	1.3205	1.1201	-0.7439	1.7627	0.112	0.5688	0.0614	0.6957	1.1729	0.323	0.8367	-0.4434	-2.3316	0.3089	0.7906	-1.1649	-1.2756	1.1124	0.9143	0.5445	1.4203	ND	-2.4189	-1.1612	0.3312	1.4758	1.2517	2.7867	2.3279	-1.2983	1.0904	0.9731	1.387
orf19.1941	NUF2	-0.1301	1.4818	1.7153	1.4216	-1.1086	0.5785	0.6644	1.8476	1.0164	0.3185	0.1886	0.6014	-1.0457	0.5089	1.1517	-0.233	-1.37	0.2236	0.3837	-0.5209	-0.8074	0.2474	-0.6951	-0.2614	1.037	0.5699	-0.5368	1.2987	2.0548	0.6457	-2.2002	0.1479	-0.2529	0.676	1.5979	-1.6873	2.2348	0.7587	1.2674	1.6253	0.0946	0.6155	0.8462	-1.0964	-1.3637	-0.2494	0.4918	-0.4921
orf19.5722	YDR026C	0.8291	0.2521	0.7447	0.8908	-1.4556	1.1992	0.7491	1.0595	0.7171	0.5606	0.5088	-0.6297	-1.071	-3.7445	0.2163	-0.5255	0.1927	1.0694	-0.2894	0.9497	1.792	-0.53	0.2366	-0.8732	1.8698	0.605	3.2331	0.0962	1.8324	1.2231	-2.0509	0.5449	0.4787	0.8353	1.8835	1.1295	-1.3108	ND	-1.9836	-0.8881	0.9495	0.4136	-0.2201	1.5139	0.5093	3.2401	0.4529	0.0787
orf19.7285	PTI1	0.8138	0.3332	0.0358	-0.3535	-1.169	-1.154	0.0512	-1.5702	2.1972	0.17	0.4793	1.4395	0.8814	0.5393	-0.3056	-0.3374	-0.7535	-0.8043	-0.4161	-1.3931	0.5054	-0.1132	-1.0204	0.2214	1.4869	2.061	2.1223	-0.507	1.0141	0.5226	0.2173	1.742	1.0637	2.0173	-1.2621	-1.3134	-1.5585	0.3386	3.2805	-1.0108	0.4616	0.0512	-0.9256	0.0834	-0.1348	0.9339	0.1829	0.4348
orf19.7634		1.322	1.7589	1.5937	1.3869	-1.0802	0.7313	0.8102	0.7448	0.3808	0.3516	-0.6372	2.5296	3.4045	-2.4601	-1.5344	0.6311	-1.5865	0.686	1.3081	1.8304	0.1509	0.5137	-1.9402	-1.3019	1.8447	0.1403	1.1553	2.7668	0.3766	2.6553	0.6119	1.9077	2.664	-0.4855	-2.7767	0.2404	-2.7087	-1.4864	-2.6581	-1.0199	0.2864	0.8999	0.4672	0.7544	0.1903	ND	0.1675	1.2083
orf19.684	PCF11	0.21	0.1296	-0.8125	-1.3604	-0.9893	-1.4646	-3.2967	0.1556	0.2987	0.0008	0.4743	1.8711	1.5639	0.2032	0.6945	-0.4723	-0.8828	0.3892	-1.1035	-1.768	-1.1037	-0.7663	-1.6786	-1.535	0.8201	2.5159	2.1432	-1.9785	-1.2136	-1.9562	0.7017	0.8026	0.4227	1.3627	1.2031	1.7438	0.5889	1.3202	1.2458	-1.2988	-1.9669	-2.0741	-2.5975	0.6805	-1.5236	2.3225	1.2048	0.0049
orf19.4882	TFA2	-0.6564	0.0867	-1.8624	-1.9832	-0.2845	-1.2702	-0.9146	-0.5715	0.2196	0.0008	0.0008	0.2106	-1.1871	0.9646	2.046	0.214	-0.6822	-0.6955	0.0542	0.1769	1.6301	1.6513	-0.3441	0.3704	-0.8632	-1.3439	-2.0087	1.5118	2.1812	1.9913	0.0873	0.7939	0.8273	-1.2732	-0.8544	-1.1212	-0.4392	-0.2774	-0.2003	0.6339	-0.7739	-3.2083	2.2824	-0.2737	1.9081	1.0273	-0.6075	-1.8221
orf19.7599	UTP5	0.6296	0.8349	0.6048	0.6502	0.0996	1.2024	1.6606	0.0512	0.4098	1.3863	1.226	1.0864	1.2013	-0.4765	-0.2045	-0.3752	-0.693	-0.8326	-0.2169	-1.3212	-0.9197	-1.3159	-0.6439	0.1853	1.5736	1.384	1.098	0.1237	0.6049	-0.1648	0.0601	-0.0394	0.871	0.0139	0.4572	0.209	-0.6966	-1.3843	0.2454	0.4918	1.4792	1.7131	-1.0004	1.0486	-0.2585	1.5876	2.322	0.8774
orf19.5053	ECO1	0.8632	0.8048	-0.6924	0.0545	1.0146	-1.1452	-0.8987	0.2443	0.4764	0.4915	0.9116	-1.6472	-0.6954	0.0571	-0.519	-0.6881	0.3508	0.3478	0.0634	-0.645	-1.0805	-1.2019	0.1248	-0.5745	-1.1465	0.8402	0.1928	-0.7306	0.2485	-0.6116	-1.4899	-0.6067	-1.663	-1.095	1.0197	-0.3292	1.1866	2.7851	0.1155	0.3858	-0.8295	0.2014	1.011	-1.792	1.5452	1.3092	0.2247	0.1674
orf19.6537	NSL1	0.4116	0.4741	0.5829	0.1837	0.8208	0.1357	0.7302	1.3318	-0.9581	0.9136	0.6854	0.8179	2.1588	0.8577	1.2057	0.4692	0.5727	0.868	-2.9907	0.593	-1.6129	-1.496	0.1288	0.5209	-0.8534	-0.5329	-0.5682	1.2656	0.4181	1.3267	0.4727	0.7319	0.7858	0.4838	0.4798	0.2761	0.8072	1.0782	0.9276	-0.6631	0.3643	0.891	-1.5395	-0.684	-1.2367	-1.1953	0.6397	1.2484
orf19.2600	SPC98	-0.6611	0.0692	0.2465	-0.2692	1.4515	0.264	0.6855	-1.9166	0.0664	1.7598	0.8356	-0.8362	-2.2152	0.1162	0.9459	0.5974	0.9016	0.8966	0.8403	0.6087	-2.0199	-1.7032	0.9021	-0.4237	0.0981	-0.1386	-1.971	-0.6156	1.1195	-1.413	-1.6157	-2.0163	-2.1979	0.6163	0.1326	-0.8284	0.797	2.0378	-0.3937	1.9217	0.4177	0.9783	-1.4309	-1.0825	0.7282	-1.1349	0.2154	0.2689
orf19.5551	MIF2	0.1819	0.6883	0.0332	0.9456	1.238	1.3195	1.4723	2.0702	0.0682	1.4004	1.522	0.732	0.6908	2.8375	0.4169	0.1289	0.511	0.8668	0.3434	0.0295	-0.1606	0.415	-0.5241	0.0551	1.798	-0.1828	1.0691	2.384	1.8408	0.887	0.4621	1.4652	2.0964	1.9908	0.3891	-1.0931	0.1566	-0.4517	0.9713	1.0882	1.4157	1.3347	0.109	-1.0716	-0.9201	-1.6547	-0.4754	1.0488
orf19.4626	TAP42	0.5618	0.255	0.8659	0.5966	0.2916	0.5378	1.4059	0.4304	0.993	0.7123	0.8375	-1.2407	0.5617	-0.8203	0.2909	0.1962	0.3224	0.0184	0.3784	0.5335	-1.3389	-1.0221	1.2827	0.0187	0.0786	0.5259	-0.2184	0.2948	0.3751	0.782	0.6993	-1.4964	-0.839	-1.549	1.338	-0.2037	1.2542	1.7633	1.5864	1.052	0.8858	0.7866	-1.8838	-0.7366	0.1344	0.4255	1.1536	0.6912
orf19.2104	JAC1	0.2124	1.8267	2.4061	1.8061	-1.3991	0.9607	0.7451	0.5115	1.977	0.0398	0.1547	0.4047	-0.4756	-1.276	0.2564	0.5184	0.2864	-0.6328	0.0717	0.3138	0.0058	0.222	-1.4182	-1.2566	1.2574	1.5722	1.6412	0.3746	1.1229	1.1477	2.5769	1.2171	2.131	1.5744	-1.0179	0.616	-1.5074	0.2738	1.0995	-0.7132	0.3891	0.8597	-2.1612	-0.5237	0.8444	-0.6641	0.4344	-0.3465
orf19.7624	BFR2	1.0671	2.3841	1.9938	1.6974	0.4308	2.3942	2.0751	1.6388	1.1049	0.1854	0.0008	1.2559	1.003	0.1356	-0.3679	0.5665	0.0796	0.5214	1.2345	0.8275	-0.4462	-0.2127	-0.3551	-0.7487	0.8693	1.5579	0.944	-0.9496	0.8654	1.2729	-0.63	0.6663	0.6985	0.0028	0.9922	1.0039	0.0264	0.8936	1.3001	0.3876	1.5471	1.6698	0.0303	-1.04	-1.7687	-1.5335	1.1401	0.5349
orf19.2417	SMC5	-1.6389	-1.3003	-0.8498	-0.5847	1.8423	0.2397	0.0715	-0.2919	-1.2021	0.2155	0.4522	-1.1442	0.7102	0.7583	0.1072	0.881	1.1463	0.0442	1.2167	0.9853	0.2176	-0.7916	1.0703	1.0121	-0.8571	-0.6301	-0.9656	-0.3129	-0.8978	-0.9807	1.2389	0.4711	0.657	-0.4847	-0.9896	0.2927	-1.5916	-1.3701	-2.4686	-0.7018	-0.9805	0.1607	-0.6749	1.286	0.1461	0.2396	-0.6979	0.7937
orf19.2820	NUP57	0.2898	1.3433	1.8103	1.466	0.3996	-0.4202	0.0111	1.1322	0.1451	-0.9369	-1.1052	-0.5122	-0.2191	-0.5304	-2.4455	-2.0107	-0.7005	1.5483	0.796	-0.9558	0.2975	0.2995	-1.7371	-1.1704	-0.7231	0.052	0.2599	0.0186	0.6311	1.5793	-0.9306	1.1472	-1.183	0.1603	1.3596	0.2977	-2.0177	-0.7898	0.1509	-0.4051	1.7433	1.7443	-3.1672	1.5871	-1.1977	-1.3234	0.8527	0.7511
orf19.5039	RRP42	0.3263	-0.9338	0.0503	-0.2771	0.1148	0.4052	-0.6284	-1.2606	0.1247	0.5324	0.361	-1.3435	0.0196	0.7752	0.8959	0.2747	-0.9826	0.3657	0.1984	-0.2898	-0.8625	-0.18	0.3479	0.3979	-0.7236	-0.4334	0.4006	1.0183	0.1736	0.5214	0.9734	0.1764	0.6745	0.6508	-0.8487	-1.2668	1.2882	0.1243	0.1853	0.024	-0.4705	-0.2353	1.5237	-1.1239	0.2482	-0.3145	-0.9115	-0.6424
orf19.124	CIC1	ND	ND	ND	ND	ND	ND	ND	ND	ND	0.3037	0.2807	ND	ND	ND	-0.4771	-0.5175	-0.9999	0.2475	0.1623	-0.8933	ND	ND	0.0029	0.7638	ND	ND	ND	ND	ND	ND	ND	ND	ND	ND	ND	ND	ND	ND	ND	ND	ND	ND	ND	ND	ND	ND	-0.337	0.3246
orf19.1791	MAK11	0.3008	0.5307	0.7925	0.5739	0.9944	1.4505	-0.6921	-0.75	-1.0097	0.7168	1.3705	0.4253	1.4836	1.2357	0.2085	0.3541	1.0381	1.3733	0.7546	0.5584	-0.599	-0.4642	0.4646	-1.0391	0.8559	0.7212	1.9179	-1.3119	0.4105	0.2507	0.9444	1.1557	1.3042	0.2922	0.0657	-1.4922	-0.2376	0.3914	0.118	-0.8093	3.0209	3.2301	0.2779	-0.4288	-1.0374	-1.8609	0.2899	2.571
orf19.832	GPI13	0.1565	-0.3677	-1.9986	-2.2178	0.3975	-0.7812	-1.4491	-1.6816	0.3774	0.1233	0.0283	1.0668	-0.6087	0.381	-0.9395	-0.841	1.3417	1.2627	0.5394	0.5812	0.3519	0.1786	-0.6376	0.2194	-1.7364	-2.0246	-2.1514	0.6833	0.614	0.7645	1.474	0.5634	0.9479	0.7111	0.1497	1.5405	-1.3415	-2.0613	-1.6967	-0.8448	-0.8868	-1.4148	0.7539	0.5268	0.0779	-0.9312	-1.1903	-1.4171
orf19.2260	BCD1	0.4518	-0.6553	-0.5341	0.5808	0.5061	1.587	-1.4758	-0.7823	0.8571	0.0007	0.0007	-2.5842	0.3225	-0.8628	-0.7452	-0.6873	0.8059	-0.7257	-1.4316	0.4121	-0.8694	-0.5273	-0.2874	-0.8521	0.6624	0.5975	0.368	0.4257	0.17	-1.1423	ND	0.0453	-0.4943	0.807	-1.3215	-1.3095	1.706	0.6446	0.581	-1.422	-1.1213	0.4997	1.1866	-0.6143	-1.7782	0.8483	0.3608	0.1929
orf19.6923		0.6281	-0.495	0.5257	0.1697	0.3344	-1.2909	-1.0483	-2.2176	-0.9602	-1.7451	-1.4333	-1.0151	0.2703	0.9818	0.1703	-0.4234	1.1173	0.0941	0.0741	0.1987	0.842	1.3125	-0.2626	-0.3949	-0.8993	-1.1098	0.0176	-0.6085	-1.5861	-1.5412	1.8204	0.6357	0.4047	0.0846	-1.2548	-1.3639	0.9144	0.1074	0.8644	-1.0201	-0.3411	0.3138	1.5631	-1.5192	1.0298	-0.61	-0.5925	0.6866
orf19.1386	BET1	1.369	0.6984	1.2829	1.1418	1.9447	2.3413	2.429	1.5182	1.1367	1.1182	1.7386	2.3519	1.0692	1.0978	1.0037	1.023	0.5791	0.7817	1.206	1.0078	-1.0624	-0.5241	1.1219	2.2081	-0.399	0.5724	-0.3804	0.8423	0.5118	0.7462	-0.5489	-0.1676	1.7007	-2.3326	-0.3031	-1.08	0.7778	1.1846	1.7867	1.3966	1.7497	2.0883	-1.1245	-0.6165	-1.007	0.6234	0.2921	0.6664
orf19.2761	GPI11	1.0114	0.3915	0.6607	0.4892	0.058	0.4026	1.1712	-0.1917	0.3359	1.0977	0.7705	-0.7404	-0.8742	-0.3997	3.5513	2.5078	1.7006	2.1513	2.7392	0.8992	-1.4419	-1.4113	1.6778	0.8701	-2.4685	-1.807	-4.5829	1.0823	0.2276	1.0336	-0.5623	-0.81	0.3976	-0.2523	-0.7662	-1.6516	0.7868	0.5974	-0.6681	0.6682	0.7569	0.6448	-1.7648	-0.3992	-1.043	-0.4742	-1.1622	0.9838
orf19.2922	HOP2	0.4732	0.9175	1.4412	0.9976	-3.1129	0.5866	1.327	0.1594	0.297	0.0673	0.0007	0.4065	0.4157	0.4943	0.2463	2.4882	-1.3884	-0.9756	-0.8688	-1.3223	1.2051	0.8626	-0.9805	1.4148	-0.5844	0.5194	0.3471	-0.73	0.5	0.552	1.3059	-0.6578	-0.4158	1.9538	-0.1431	-1.8521	1.3875	0.7428	1.3431	0.9631	0.5189	0.5629	-0.0725	-0.4419	0.5839	2.6429	1.7207	0.2321
orf19.6252	IWS1	0.5075	1.2656	1.4094	1.2522	0.5004	-0.4632	0.2739	0.5084	-1.2947	0.0033	0.38	-0.8943	-0.569	-1.426	-2.0062	-3.9446	0.0114	0.2911	-0.149	-0.6359	-0.2837	0.2661	-1.0309	-1.5474	0.0288	0.0824	1.2728	0.5812	-1.252	-1.994	0.0079	1.3924	0.7277	0.2246	0.8559	0.4864	0.0772	0.3012	0.1218	0.0575	3.5531	2.7509	1.3343	-1.0636	1.2786	0.3976	0.1097	0.1402
orf19.6217	SEC31	ND	ND	ND	ND	ND	ND	ND	ND	ND	1.4075	1.0846	ND	ND	ND	2.7339	2.2575	-1.3444	-2.0212	-2.214	-2.1605	ND	ND	1.4096	0.3362	ND	ND	ND	ND	ND	ND	ND	ND	ND	ND	ND	ND	ND	ND	ND	ND	ND	ND	ND	ND	ND	ND	-0.3547	0.2401
orf19.640	YFR042W	0.4178	-1.5198	-1.4139	-0.6964	-2.0255	-1.0053	0.2985	-1.2349	-0.6291	0.0008	0.0008	0.1859	1.1568	1.5111	1.9884	0.1494	0.5645	-0.3521	0.1067	0.5285	-1.8203	-1.3044	0.6243	-0.3534	-0.2433	-1.5113	0.403	0.6225	0.9976	1.3525	-0.9077	0.3132	0.4265	0.7906	-1.2702	-1.3927	0.1571	-1.6777	-1.5337	0.1458	-0.7824	-0.3616	-1.1065	0.2154	-1.3001	-0.8532	-0.392	1.5655
orf19.1361	MAS6	1.3879	-0.9642	-1.2844	-1.1288	0.2827	0.1626	0.3584	-0.3975	0.9828	0.5127	0.8217	3.1478	2.4938	1.4918	0.1314	0.466	2.8903	0.685	2.0316	1.347	-0.8736	0.2013	-0.3545	0.3766	0.0221	1.1761	0.1774	0.6567	0.3764	0.7051	-0.9656	2.0158	2.2801	-0.8607	-2.3418	0.0047	0.7618	1.2429	1.2327	1.2093	1.6587	0.5937	-1.3015	-0.4468	-0.4387	1.1137	1.095	0.6111
orf19.491	SEC63	-0.9184	-1.1817	-1.1303	-0.3303	0.5269	-0.924	0.0973	-1.0054	-1.2639	0.6491	0.5966	-0.2794	-0.1076	1.0363	1.4341	1.2208	1.3673	-1.3181	1.4919	0.424	-0.5027	0.7219	0.354	0.5686	-0.5475	-1.834	0.2291	0.9668	-0.3677	-0.288	0.6587	0.1635	0.5269	1.0438	-0.7731	-1.8167	-0.4066	0.6189	-0.5468	0.96	-0.2404	-0.2871	1.1878	-0.8195	-0.268	-1.0847	-1.7027	-0.5893
orf19.793		0.57	-1.3274	-0.6533	-0.6099	1.8939	-0.7892	-0.2394	-0.4215	0.5328	0.9544	1.7183	-1.0361	-0.4986	0.9795	0.7012	-0.726	1.2183	0.8403	1.005	0.8684	-0.5845	-0.3106	0.8377	0.5296	-0.6941	-0.5679	0.0406	1.5881	0.9372	1.8609	0.8083	1.5369	0.4964	-0.1705	-1.8121	1.0072	-2.2314	-2.1281	-1.2745	-0.9987	0.166	0.9388	-1.5442	-2.3014	0.1399	-1.3768	-1.481	-1.5502
orf19.6131	TSC10	0.2637	-1.0094	-1.1689	-0.8356	1.113	-0.765	-0.2516	0.1123	0.9012	1.6291	0.4747	0.3675	-1.3878	-1.0593	0.2941	0.0322	0.1352	0.9836	0.5301	0.9643	-1.2996	-1.4232	0.6523	0.5146	-1.8209	0.0523	0.0291	0.8426	0.5006	0.2795	1.1813	0.6756	1.2682	-2.1324	0.1928	-1.0231	0.4919	1.582	0.4786	-1.0127	-1.0326	0.2899	0.8705	-0.4248	0.3629	-1.1264	-0.6814	0.8788
orf19.4353		0.1395	-1.9201	-0.6736	-0.5009	0.0958	0.333	-0.2772	-0.9381	-2.3922	1.5757	1.1015	-0.8064	0.5078	0.0325	0.5355	-0.5357	0.9272	1.8511	0.4114	0.7572	-1.0262	-1.014	0.6864	0.271	-1.7393	0.1444	-0.5572	0.0811	0.0127	0.0738	0.6781	0.81	0.4709	0.7023	0.4553	0.9196	0.4367	0.8199	1.0666	0.0423	-1.4112	0.4543	-0.647	0.1447	0.3968	-1.7149	-0.6815	-0.5517
orf19.2267	RFA2	0.6316	-0.6553	0.2055	0.3176	1.3652	-1.4272	-1.889	-2.9037	0.3925	-1.1113	-1.36	0.42	0.6982	0.9304	0.6384	-0.5574	0.0886	0.117	0.0229	0.1442	0.4655	0.6995	0.1568	-1.4412	-1.0958	-1.3254	0.5167	2.0534	0.5652	0.7716	0.823	0.6529	0.4914	-1.7367	1.0284	0.0938	0.9642	3.1304	1.2369	-0.9472	0.0051	-0.255	1.5152	-1.1394	0.8598	-0.9363	-1.441	-0.6628
orf19.6052	CNS1	ND	ND	ND	ND	ND	ND	ND	ND	ND	1.6028	1.3395	ND	ND	ND	-0.5117	0.6803	-1.0875	0.3633	-0.6344	0.8163	ND	ND	0.5266	0.4006	ND	ND	ND	ND	ND	ND	ND	ND	ND	ND	ND	ND	ND	ND	ND	ND	ND	ND	ND	ND	ND	ND	0.6186	0.2314
orf19.3831	PXR1	0.1247	-0.4661	0.2034	0.188	0.5577	0.2389	0.2109	-1.7068	0.173	-0.4359	0.2067	0.1108	0.5886	0.4267	0.219	-0.8856	0.6459	0.9031	0.0341	0.2219	0.4125	-0.6691	0.9199	-0.5214	0.2176	0.1144	0.5582	0.7415	0.0485	-1.0016	1.0648	0.8143	1.3064	0.3682	1.2751	0.1279	1.301	2.0452	0.6702	0.6397	-0.8598	0.207	-0.6442	0.1255	-0.5664	-1.3303	-0.7492	0.3048
orf19.4659	PRP21	ND	ND	ND	ND	ND	ND	ND	ND	ND	2.2327	1.7232	ND	ND	ND	1.884	1.1233	0.1421	0.1278	-0.9244	0.0817	ND	ND	1.3586	1.4993	ND	ND	ND	ND	ND	ND	ND	ND	ND	ND	ND	ND	ND	ND	ND	ND	ND	ND	ND	ND	ND	ND	-1.0434	-1.4604
orf19.4029	SQT1	1.2128	1.5648	2.343	1.157	-1.5022	1.2304	1.938	0.0106	1.0447	0.4404	0.2459	2.6459	1.7871	-1.8593	-0.5864	0.6443	1.0426	1.4174	-0.4304	-0.5636	0.3092	0.4549	0.0401	-1.2488	1.3242	1.9529	1.3081	0.8895	0.2868	0.6783	-0.8577	0.472	1.7962	-1.16	0.3041	-0.6785	1.008	1.1279	1.7091	-1.9493	-0.0631	0.7412	0.4711	-0.9666	0.6992	0.3934	0.1333	-1.2115
orf19.3609	UTP15	0.3173	-0.3952	0.0626	0.147	0.9206	0.8415	0.5036	-0.7191	0.718	1.0961	0.7643	-1.016	0.935	0.5792	0.2108	-0.9484	-1.1462	-0.8489	-0.8004	-0.5772	-0.4632	-1.4658	-1.3086	0.4525	0.6037	1.8018	0.6408	-0.2345	0.1171	0.4096	0.4053	-0.4594	0.4072	-1.9819	0.7859	-0.7475	-0.1022	-0.7814	-1.4153	0.8334	2.4663	2.0518	-1.566	0.4828	-1.3633	0.3555	0.2285	1.0428
orf19.2830	RRP9	-0.8846	-0.8582	0.3277	0.2577	0.9457	1.1678	0.5447	0.3535	-0.7123	0.6049	1.9123	-0.4188	-0.9524	-1.3911	-0.4844	0.7714	-1.6344	1.8841	0.8988	0.7083	-1.4979	-1.6612	0.8676	-0.6074	0.2761	-0.7415	-1.0205	-1.032	-0.9588	0.3618	0.6366	-0.9082	-1.1393	1.2479	-1.2136	0.3183	-1.4818	-1.3981	-0.9899	0.7214	0.4948	0.6287	0.5343	-0.6687	-0.4385	0.1503	-0.6738	1.3298
orf19.1769	PLP2	0.5967	1.8289	1.9382	1.8805	-0.4519	1.6855	1.528	2.5181	1.0286	0.0178	0.4264	1.3064	0.2889	0.6027	-0.9661	0.4218	-0.9293	-0.683	-0.3719	-0.9845	-0.5182	0.3435	-1.5507	-0.3377	1.179	0.9119	1.0676	0.1127	0.6577	0.2543	-2.0172	0.2396	1.1554	1.2937	0.8006	0.1835	0.873	2.0689	1.329	0.4188	0.1275	0.9196	1.3667	-0.4866	-0.4139	0.546	3.2147	1.7755
orf19.5492		0.669	-1.4965	-0.6573	-0.5657	0.7805	-0.6739	-0.9969	0.1047	-1.5226	0.5765	0.3261	-0.2381	-0.6106	0.4392	-0.747	0.2844	0.2826	-0.0452	0.892	1.4078	-0.2458	-0.5712	-0.326	0.1342	-2.6273	-1.628	-0.5395	-1.1087	-1.0833	-1.364	0.715	0.8795	-0.606	-1.1975	0.3886	-0.6271	0.9302	2.1765	-0.2963	0.487	0.6088	0.3244	-0.414	-2.1173	0.4317	0.1827	-1.8151	1.5198
orf19.302	BET5	0.5584	-0.6451	0.3394	-0.3704	0.5833	0.4592	-0.6422	0.613	-1.2032	0.8999	0.8356	0.0817	-0.948	1.3973	0.3028	0.2979	1.4235	0.6859	1.2955	2.2077	-1.2769	-0.6711	1.0721	0.419	-1.2038	-1.4969	-1.1613	0.4216	0.0945	-0.2901	1.0553	0.2401	1.1128	-0.9397	-1.9542	-0.6988	1.2279	0.4958	-0.5424	-0.4245	1.0512	0.5612	-0.1363	-0.963	0.0686	-1.1007	-1.1974	0.8421
orf19.4499	RIM2	1.2952	-0.8365	-0.1326	0.5666	0.9728	-0.7648	-0.659	-1.8796	-2.2353	0.0008	0.1652	-2.3167	-2.7489	0.8731	-0.9646	-1.0746	-0.4212	0.2439	0.4545	0.2503	0.1771	0.0424	1.3802	-0.8261	-1.806	-0.6717	-0.601	-1.3244	0.1165	0.2614	1.0233	0.6672	-2.4248	-3.0081	3.2521	-1.0121	0.4436	3.7944	1.3594	0.511	0.1564	0.1079	0.4081	-1.6247	0.8003	0.7084	-1.8163	1.0644
orf19.1646	MRD1	ND	ND	ND	ND	ND	ND	ND	ND	ND	0.0008	0.0008	ND	ND	ND	-0.8955	0.9966	0.4953	1.7596	0.7137	0.1706	ND	ND	-0.3848	0.3464	ND	ND	ND	ND	ND	ND	ND	ND	ND	ND	ND	ND	ND	ND	ND	ND	ND	ND	ND	ND	ND	ND	0.7029	1.6841
orf19.5407	SOF1	-0.4842	0.151	-1.2831	-1.599	-0.152	-0.2603	-0.2312	-0.3883	-0.1465	-0.4962	-0.1061	-0.0295	-0.2545	0.1119	1.6691	0.5564	-1.3419	-1.067	-1.0813	-1.0602	0.9152	0.9489	-0.5766	1.1687	-0.5647	-1.2605	-1.6192	0.3826	1.9445	2.0825	0.5721	1.3715	1.5458	-0.3336	-0.8453	-0.8702	-0.8595	-1.0374	-1.003	0.307	-0.8008	-1.7369	0.9597	0.2255	0.5937	0.7166	-0.3411	-1.576
orf19.4835	UTP7	-0.7782	0.3465	0.421	0.6915	1.0867	0.7029	-0.6443	-1.2208	-0.3245	1.3807	0.6527	-1.2064	-0.6914	2.0306	1.3634	0.8392	1.081	0.6442	0.9284	-1.1165	0.0249	-0.7685	1.0863	0.7149	-0.5037	-0.3222	0.0937	-0.5526	-1.8771	-1.565	0.4677	1.13	0.2648	0.1143	-0.8952	-1.3162	0.0628	-0.6651	-0.8623	-0.5695	0.1684	0.7462	0.7399	-1.643	0.1633	-0.8467	-0.3932	0.0266
orf19.1352	TIM22	0.2142	-0.5798	0.0368	-0.0904	1.2083	0.3493	-0.372	0.2643	0.0243	-1.885	-0.9833	-0.5468	0.2852	0.26	-0.6845	-0.8163	0.2049	-0.7634	-1.0773	-0.5608	1.0914	0.1808	0.4723	-1.0246	0.4507	-0.9863	0.0655	-0.6076	-0.661	0.5042	0.8571	0.425	0.5851	0.8373	2.0405	-0.6494	0.3763	0.7302	-0.7141	0.2726	-0.4111	-0.5192	1.1565	1.2698	0.375	-0.5682	-1.8283	0.5018
orf19.6740		ND	ND	ND	ND	ND	ND	ND	ND	ND	0.007	0.461	ND	ND	ND	-1.0147	-0.6322	-0.3231	-0.2168	-1.1869	0.4312	ND	ND	-1.7071	0.1634	ND	ND	ND	ND	ND	ND	ND	ND	ND	ND	ND	ND	ND	ND	ND	ND	ND	ND	ND	ND	ND	ND	1.1572	0.3809
orf19.6044	MOB2	-0.5506	1.0855	0.6938	1.1239	-2.1068	1.1219	1.2446	0.9398	0.6769	1.2255	1.3605	1.2455	0.9216	-0.7388	1.9539	1.1208	-0.8345	-0.7255	-0.5578	0.1607	-0.6244	-0.6806	-0.3681	0.4227	1.0609	0.8487	0.438	0.712	1.1727	0.413	-1.1929	0.2883	1.6617	0.3923	-0.2757	0.076	0.4914	-0.8822	0.2611	0.6655	0.4517	0.2969	-1.8323	0.1857	-0.4944	0.1899	0.5093	-0.3133
orf19.2790	SWD2	-0.7043	-1.0435	-0.7657	-0.215	0.7236	-1.3259	-0.9568	-1.2949	0.3658	0.0008	0.0652	0.1459	-0.5147	-2.5108	-0.6701	-1.9418	0.1349	-0.6117	0.8146	-0.3759	-0.9947	-0.632	-0.6197	-1.8198	0.9049	-0.659	1.4172	0.3924	-0.7642	-1.5019	0.5619	0.0157	0.3372	0.5786	0.1267	-0.9858	-0.7864	0.662	0.1158	-0.5982	-1.6593	0.3582	0.3751	-0.0725	0.8229	-0.7445	-0.4108	-0.7394
orf19.3169	YOR262W	0.1961	0.648	0.9249	1.01	0.8017	0.0891	-0.508	1.5801	0.6567	-1.0671	-0.6356	0.7451	1.1505	2.3375	0.6161	-0.7802	0.0112	0.517	0.2184	0.6405	0.1592	0.3773	-1.5019	-1.1307	-0.7401	-1.5555	0.6244	0.6863	0.7556	0.3276	1.3728	0.7825	0.0149	0.1921	-0.7722	0.7577	-0.653	0.9975	0.5578	0.4702	0.421	1.2642	0.8072	0.0885	-1.1538	0.0936	-0.8388	-0.2707
orf19.2105	CWC24	0.5525	0.9312	0.8689	0.7685	0.2726	2.1469	1.4946	2.0998	0.8386	1.2987	1.4673	1.5194	1.194	-1.5155	0.0132	0.9044	-0.1527	-0.7978	0.5358	0.1548	-1.0698	-0.904	0.169	0.6279	0.0316	0.6232	0.3974	0.43	0.6428	0.9146	-1.6825	-1.167	1.5104	-1.5849	0.1284	-0.5607	0.7754	0.9582	0.8191	0.7912	0.7515	0.9009	-0.4845	-0.1454	-0.4323	0.5291	1.1724	-0.4134
orf19.3575	CDC19	-0.7075	-1.1503	-1.7938	-1.3192	-0.5147	-1.3249	-1.1198	-1.4292	0.0044	0.0007	0.4423	0.3287	-0.941	-2.0673	-1.6283	-0.3133	0.3489	-0.3355	-1.6188	-1.3151	-1.0551	-0.8092	0.9208	-0.4965	-1.773	-2.0223	0.3964	-1.4178	-2.0621	-1.7178	0.2609	0.0459	-2.1778	-0.3778	-0.8994	-0.5198	0.5943	1.1783	0.6814	0.2701	-1.0069	0.4067	-0.978	0.267	-1.9039	0.454	0.2087	0.2937
orf19.2093	RFA1	ND	ND	ND	ND	ND	ND	ND	ND	ND	0.3996	-0.5119	ND	ND	ND	0.0705	0.0459	-0.3479	0.147	0.3072	-0.4111	ND	ND	-0.7238	-0.8964	ND	ND	ND	ND	ND	ND	ND	ND	ND	ND	ND	ND	ND	ND	ND	ND	ND	ND	ND	ND	ND	ND	0.6789	-0.4475
orf19.514	LSM2	-0.756	-0.4048	0.4854	0.1774	0.9506	0.7903	0.4845	0.7123	0.132	0.3598	0.0457	0.4886	0.5891	0.8379	-0.623	-2.0734	0.0779	0.5174	-0.555	0.6765	0.1723	0.0818	0.8271	0.3621	2.4205	1.9897	2.362	-1.3063	-0.3956	-1.4906	0.9889	0.8577	0.6107	1.2863	1.0405	0.2366	-0.6967	-1.1904	0.4207	0.2265	2.1578	2.361	0.6629	0.8141	0.2667	0.4265	-1.3948	-1.3018
orf19.930	PET9	0.0838	-0.9217	-0.8731	-0.3426	-0.8968	0.3152	0.1561	-0.8355	0.1653	0.9966	1.4882	1.0506	0.0532	0.1709	0.2019	0.6616	-0.5228	0.2748	0.518	0.2264	-0.9288	-1.3284	0.7696	1.0724	-0.9241	0.2694	-0.5544	-0.3497	0.8196	-0.6858	0.2769	0.6827	2.1576	1.6249	1.2287	0.5538	-0.9015	0.5374	-1.3993	-1.3158	0.2999	1.2912	-0.5649	1.7404	0.4638	1.1118	-0.9589	0.2089
orf19.2796	POL12	0.6206	-0.7293	-0.3266	0.0049	-1.7365	-1.5151	-1.4617	-1.3457	-0.3935	0.0007	0.0007	-0.9074	-1.2592	0.8957	0.6836	-0.8206	1.1469	0.235	-1.296	-0.5594	0.3603	0.6383	0.1533	0.1998	-1.5666	0.4429	0.2375	ND	-1.6655	2.4556	0.4402	0.4149	-1.86	0.1934	0.0733	-1.2667	0.6966	0.9736	0.9403	-1.6502	-0.7501	-0.0846	-1.6437	-1.3342	-0.7642	0.4346	-1.329	0.5159
orf19.2756	ERD2	0.8583	0.0895	0.4752	1.5536	1.3248	0.3847	0.4436	-0.6924	-0.9769	-1.0145	0.0083	0.4834	0.7084	0.5542	-0.5046	-0.9879	1.1381	-0.0597	-1.0253	2.2574	-0.7647	-0.7141	0.8154	-1.1126	-0.7261	-0.7215	0.3115	1.3409	0.6446	0.7361	0.2007	0.3827	0.056	0.1454	0.7608	0.8608	0.9076	1.0345	0.4958	0.3365	0.7057	1.2095	0.1544	0.0022	-2.9301	-0.5337	-0.987	-0.9106
orf19.2518	SEC17	0.4741	-0.3638	1.0207	0.5873	0.5484	1.3548	0.6538	0.5384	-1.1914	0.4177	0.7473	0.66	2.7767	1.5964	0.2086	-0.152	1.2694	1.4706	0.5089	2.426	-0.528	0.0292	0.2319	0.7505	0.3175	0.0694	-1.7174	0.4005	-0.6047	0.1563	ND	0.8276	0.7331	ND	-2.346	-1.3681	1.6004	0.2264	0.9148	2.0664	2.415	2.0853	0.4791	1.8774	1.8849	-2.8969	0.1294	0.3598
orf19.2138	ILS1	0.5887	2.5016	3.4757	2.3967	0.4054	1.6784	1.0044	2.7726	2.0429	0.2711	0.2731	2.0599	3.0242	0.1599	0.1372	0.1061	0.1537	0.1341	-0.573	0.4802	-1.1753	-0.7343	-0.9875	-0.3308	2.6738	1.6606	0.9503	0.5613	0.8444	1.4786	1.6567	1.588	2.9387	0.7141	-2.254	-0.95	-1.1645	-0.8753	0.3597	-0.7063	-0.3691	0.6607	-1.9076	0.8856	ND	1.5247	0.0361	0.7775
orf19.4028	RER2	0.5372	-0.6507	0.213	1.4848	1.0577	0.6928	0.4026	-3.1374	0.8543	0.0008	0.0747	1.4068	1.5555	-1.1016	0.002	-0.5938	-0.1404	0.2188	0.1	0.5232	0.012	-0.4236	0.1155	0.4886	0.219	0.511	1.0765	0.4135	0.3253	1.6833	2.3027	0.7909	1.0186	3.1785	0.213	-0.8267	0.4907	1.3194	0.2925	0.9963	0.6366	0.3559	1.8268	1.6544	1.048	0.1237	0.5779	0.4066
orf19.1279	CDS1	0.6778	0.2594	0.6606	0.9896	-0.7826	1.1948	0.5183	0.0664	0.6846	-0.4558	0.4252	-0.7512	0.1754	0.2792	0.1035	-1.2957	1.848	1.877	0.9089	2.9846	0.1046	0.359	-1.8218	-1.51	-1.4457	1.0079	0.11	0.4331	1.0047	1.219	-1.197	ND	0.0591	-3.0922	0.1775	-0.6592	1.2334	1.6868	2.2412	-0.8805	-0.4912	0.0681	-1.0616	0.2843	2.3618	0.2589	0.7579	0.2663
orf19.4993	SEC18	0.7404	1.2062	1.8952	1.6492	-2.5746	1.517	1.0006	-1.0816	0.6156	-0.3778	0.0507	2.1801	0.4014	0.2263	0.8697	0.0697	-1.9866	0.6378	-0.7404	1.3209	-1.107	1.3852	-2.0383	-0.793	1.8985	2.866	1.7518	1.7442	1.0353	0.9081	1.7324	0.8432	1.2218	0.6091	-0.8366	-1.5677	-1.2458	0.1129	0.5766	0.887	0.4736	0.6681	-1.5394	1.2258	0.4248	0.0954	0.7612	0.8058
orf19.4620	MRS5	0.9303	0.4271	0.6724	0.2125	0.8834	0.3709	0.9764	0.3978	-0.2769	-1.2058	0.5683	-0.1838	0.3488	1.274	0.9237	0.1955	-1.2008	-1.6456	-2.2656	-1.8033	-2.1836	-1.8694	-0.1546	-1.5269	-0.7778	1.2541	0.9566	0.6235	-0.7996	0.5226	-1.9155	-1.5705	-1.3535	-1.5276	0.335	0.115	0.7519	0.9664	0.9935	0.8664	0.5209	0.7641	0.474	0.1313	-1.7253	0.3303	1.0052	-1.5126
orf19.1282	CKS1	-0.3122	0.1644	-1.2433	-2.4825	-1.3814	-0.7962	-0.2536	0.5197	-0.3877	-0.253	-0.7449	0.1056	0.1668	0.4537	-3.1267	0.4559	0.8106	0.2059	0.3708	1.683	0.3882	0.0972	-0.8622	-0.7556	-1.1324	-1.696	-2.5374	-1.1143	-1.1844	-2.991	-1.9067	-1.5112	-1.9571	0.0201	1.2882	-1.2189	-0.2954	-2.1857	-1.0472	-0.7883	-1.2933	ND	-1.3895	1.3656	0.8235	0.3205	1.0113	-0.7168
orf19.3540	MAK5	ND	ND	ND	ND	ND	ND	ND	ND	ND	0.363	1.0655	ND	ND	ND	-2.0526	0.5256	0.7471	-2.0002	-1.0525	-1.795	ND	ND	0.8795	0.3076	ND	ND	ND	ND	ND	ND	ND	ND	ND	ND	ND	ND	ND	ND	ND	ND	ND	ND	ND	ND	ND	ND	-1.1048	-1.1222
orf19.3541	SUP45	0.8843	-1.5793	-1.2058	-1.0088	0.242	-0.9737	-0.5377	-1.3824	-0.4237	-0.3131	0.3059	-0.5936	-1.4807	-1.3865	-2.2969	-1.4083	0.1835	-1.0948	-0.2817	0.2482	-1.5883	-1.5571	0.355	-2.141	0.7259	0.4926	0.3591	-1.4762	-1.5659	-1.2646	-0.9677	0.6517	0.4439	0.4793	0.3662	-0.9155	0.7319	2.2161	-0.2837	0.745	-0.9409	-0.1512	0.2674	0.4808	-0.741	-0.3091	-0.9548	0.3873
orf19.3856	CDC28	0.7965	-0.8808	0.4646	-0.1933	-1.2797	-0.6874	-1.0446	-2.1327	-1.5773	-0.3683	-0.4963	0.0311	-2.4127	-2.2163	-1.4659	-1.3528	0.3807	0.7303	0.5775	0.5313	-0.9745	0.0302	-0.5192	-1.8661	-1.3224	-1.7184	0.4096	1.1014	0.1276	0.9277	-0.4418	-2.0634	1.0258	-0.9025	0.5846	0.9136	1.1008	2.772	0.4646	0.1469	-1.1153	0.3782	0.1041	-0.131	-1.1114	-0.8997	-1.6808	-0.4356
orf19.3888	PGI1	0.8835	0.5526	0.0766	-1.0591	0.8904	1.3136	-0.6417	-2.4168	0.0945	0.0008	0.5415	-1.6622	-1.6867	-1.6137	0.3401	0.657	0.3669	0.2569	0.1266	0.486	1.0279	-1.5988	0.1154	-0.2813	0.8032	0.0223	0.3432	-0.8533	-1.2412	0.5747	0.67	0.5395	ND	ND	0.5912	-0.6619	ND	3.6384	1.7294	0.4887	-1.3423	-0.5824	0.2534	-1.2301	0.9682	-1.6637	-1.964	1.129
orf19.536	TAF5	ND	ND	ND	ND	ND	ND	ND	ND	ND	0.6355	1.9514	ND	ND	ND	0.4033	-0.9982	1.1292	2.714	1.6973	1.5173	ND	ND	0.3559	-0.2447	ND	ND	ND	ND	ND	ND	ND	ND	ND	ND	ND	ND	ND	ND	ND	ND	ND	ND	ND	ND	ND	ND	-0.2985	0.3876
orf19.202	CDC47	1.5099	0.1666	0.3354	0.6035	0.9845	0.4172	0.9778	0.606	-0.8437	0.9291	1.1126	1.0246	1.9	2.071	0.7761	0.2179	0.1554	0.547	-0.4525	0.9591	0.4454	0.1019	0.0898	0.3378	-0.9166	0.4529	-0.9192	0.0957	0.6981	1.1036	1.9921	1.443	1.5307	-0.8563	0.8056	0.2058	1.1499	0.9878	0.9729	0.0926	0.7104	0.7951	0.9166	-0.5496	1.3306	-1.2313	0.2388	0.3048
orf19.3873	ARC40	-1.6333	-1.3118	-0.4178	0.3995	0.234	-0.7351	-0.5819	-1.0532	-0.4731	-1.4938	-0.7498	0.6875	1.3509	1.9213	0.2362	-0.7883	0.5183	-0.3556	0.0003	-0.6855	0.6603	0.6208	-0.9888	-0.5676	-0.0713	0.0925	1.744	0.0934	0.0759	1.1735	1.8062	1.2631	0.7643	1.1299	-1.1985	-1.8627	1.2465	0.4887	0.263	0.5524	-0.4238	0.4171	2.5979	-2.0296	-1.5012	-0.6592	0.8122	0.7124
orf19.6716	ABD1	0.1645	0.1456	0.5041	0.5227	1.4086	-0.8556	0.4904	0.7411	0.3656	1.3474	2.2153	2.4865	1.231	1.1494	0.0416	0.8504	0.4652	0.5009	1.4529	1.704	1.4837	0.3106	-1.955	0.9571	0.8398	0.9324	-0.4076	0.0127	1.0917	1.0091	1.3856	3.0661	3.0707	0.2421	0.497	0.0347	-0.3066	ND	2.4443	-1.9274	0.2564	3.001	2.2097	-0.6753	-0.8733	0.9457	0.6392	0.8891
orf19.3322	DUT1	1.1139	0.2582	0.5462	0.9348	0.7261	1.5582	2.2943	1.5318	1.1502	1.2	1.5197	2.7405	0.1655	2.0952	1.535	1.2436	1.4398	0.6855	-0.8842	1.9611	-0.4621	-0.6314	0.1487	0.9841	0.3481	0.4289	1.0878	-1.1551	0.2493	0.8523	1.6794	0.9854	0.9949	-1.6606	0.8168	-1.106	-0.8039	2.7826	1.7491	0.5609	0.9906	2.3436	0.6503	-1.4113	0.1818	-1.1538	-0.5119	0.3041
orf19.3317		0.9381	0.3525	-0.6269	-0.6772	1.0066	0.3461	0.4919	1.1406	0.11	0.503	0.4134	1.9319	-0.76	0.1474	-3.2336	-3.3254	1.9779	2.1511	1.2328	0.9752	0.4352	0.1455	0.1979	0.2168	-0.8572	-1.6462	0.296	0.1507	0.1071	0.6801	0.318	0.6825	0.5608	0.75	1.5714	-2.1207	-1.9922	-2.3099	-1.7105	-1.0863	-0.762	-0.2076	1.8943	0.7176	0.0192	1.529	-0.4754	0.0364
orf19.3314	TRS20	1.7562	1.4748	1.9383	2.0221	-1.2711	1.5135	1.4061	1.9211	1.2929	0.3161	0.2904	-0.3874	1.6828	0.5194	-0.1879	-0.6473	-1.0367	-0.215	-1.6444	-0.8697	0.7164	0.4146	-1.6443	-0.6789	-0.2558	1.133	1.0039	-0.6144	0.8283	1.4283	0.0965	0.7593	1.5598	0.5503	1.4718	0.7168	0.9699	1.9918	2.131	1.1355	0.4845	0.464	0.7091	-1.5873	-0.6296	0.3513	0.0335	1.4016
orf19.7072	PGS1	0.6898	0.8191	0.1888	1.3178	-1.0212	1.1931	0.7109	0.5206	1.67	0.9713	1.0148	2.1186	0.2624	1.083	-0.4292	0.8319	-0.5595	-0.4043	0.3441	-0.743	0.5651	0.253	0.1215	-0.8315	1.8319	1.035	0.2518	-0.0556	-2.1752	1.3607	-1.405	1.1743	0.8197	0.9619	0.0298	-0.9333	0.1788	0.0722	0.4313	0.272	0.2697	0.1285	-1.8544	0.5033	0.1818	2.9368	0.88	0.0424
orf19.7081	NFS1	1.0024	0.925	1.0814	0.9465	1.239	1.5436	1.6703	0.5306	1.1281	0.5001	1.0877	1.8238	0.7046	0.4668	1.2242	1.0912	0.1956	0.8328	-0.3576	0.7157	-0.2068	0.1793	0.4732	0.6122	0.1031	0.0228	0.4833	0.5043	0.7133	0.7052	0.2458	0.7541	1.02	-0.4626	0.1894	0.306	0.9747	0.6192	ND	0.0694	1.0247	0.8873	-1.1866	0.3512	0.196	0.3253	0.6441	1.4767
orf19.76	SPB1	0.706	0.4931	0.6685	1.0561	0.1522	0.0989	0.3731	-0.7025	1.3101	0.1533	0.9281	0.8506	0.4554	-1.3142	-1.0029	1.2903	-0.8173	-1.6578	-0.8336	-1.3707	0.246	0.3268	-0.2759	-0.3593	0.1398	0.5133	0.0949	-1.3115	-0.5341	-0.4613	-1.3247	-1.2561	-0.9408	0.2934	-0.858	0.361	-0.8214	-1.2695	-1.8042	-1.4488	-1.2361	-1.4905	-0.7777	1.1778	1.0923	1.9589	0.1147	0.3852
orf19.3651	PGK1	-0.4548	0.6921	1.3081	1.4846	0.2779	0.6838	0.3908	0.9629	1.8301	0.2765	0.165	1.6192	-0.8512	-1.9262	0.605	-0.1276	-1.3743	-1.0197	-0.7532	0.3323	0.5237	0.3617	-2.1273	-0.6219	0.5261	0.9142	0.0937	-0.7409	0.4737	0.8587	-0.9762	-0.992	1.3729	-0.838	0.6412	-0.1464	-1.3076	0.7607	0.9836	0.1242	1.0487	0.5827	-0.5781	0.5602	0.4955	1.8656	0.8827	0.0023
orf19.3276	PWP2	0.7578	1.445	0.9874	0.5877	1.8849	0.3355	-0.9388	0.9755	0.6754	0.0008	0.0008	0.2782	0.0832	0.6067	0.346	-1.0714	1.7529	1.8576	1.579	1.7314	0.9439	0.618	0.0751	0.2091	-1.0125	-1.6528	-2.0206	2.3602	2.5018	2.0206	1.0461	2.4042	2.208	0.065	-0.778	2.5185	0.0626	0.0576	0.8959	2.8016	1.8596	0.9678	1.5571	0.0524	0.3337	-0.5377	0.562	1.2672
orf19.3778	YCR072C	0.8658	-0.8303	-1.0353	-1.505	2.4604	-0.5971	-1.4511	0.2711	-0.5119	0.1051	0.3718	1.4074	-1.0866	0.5565	2.1668	0.2936	0.0135	0.2284	0.9572	0.4515	0.2839	0.0408	0.0396	0.2496	0.6636	-0.9314	-0.6042	0.1096	0.3446	1.0379	1.5891	0.4585	-0.7198	-1.0192	1.1569	0.5394	-1.4374	0.4658	-1.2399	-0.7849	-1.2603	-1.8966	0.3208	1.3815	1.3012	1.619	-0.7378	0.9569
orf19.3178	PRP9	0.2175	-0.2046	0.1628	0.4633	0.277	-0.1143	0.9695	-0.5228	0.8931	1.8624	1.5296	0.0264	0.2711	2.2389	0.3854	0.8871	-1.7	-0.5775	0.3197	0.16	-1.2451	0.1392	1.2653	1.2736	-1.3835	0.1344	0.0236	0.9887	0.787	0.1652	0.1489	0.6811	0.6514	1.4914	1.0725	0.8718	0.9006	0.7849	0.6045	1.3091	-0.1706	0.9646	-0.5919	0.255	0.027	0.246	-1.3326	2.1714
orf19.4724		0.8017	-1.7559	-1.2785	-0.7172	0.1454	-1.2964	-0.6718	-1.6539	0.0119	0.7476	0.8211	-1.0465	-1.6438	0.0821	0.1753	-0.2817	1.8824	0.7535	0.7347	0	-1.0646	-1.4756	0.3338	-0.4576	0.0938	-0.9059	-0.7292	-0.7105	-0.8728	-1.365	0.9282	-1.8017	-1.5815	-2.8904	-1.9395	1.3107	1.0271	1.3507	0.2964	0.1943	-1.0784	0.3265	0.9691	-1.737	-0.778	-1.3635	0.2671	0.1012
orf19.5200	SIT4	0.711	-1.2248	-0.323	0.1968	0.2487	-0.8835	0.0371	0.6071	-1.646	-0.5174	-0.5704	-1.6419	-0.6448	0.6932	1.0802	0.0336	-1.549	-1.5702	-1.2942	-1.8555	-0.8605	-0.3273	0.2487	1.1823	-1.4215	-2.0762	-1.6285	0.0465	0.7646	2.1166	0.6099	-0.4022	-0.9084	1.0619	1.6029	-0.6811	0.6971	0.7801	-0.7999	-0.6596	-1.0994	-0.8273	-1.3067	-0.9513	0.9988	-0.7887	0.2219	ND
orf19.6190	PSA1	0.4444	0.8361	0.661	0.7403	1.0195	0.6469	0.7617	-0.9134	0.777	0.5206	0.1045	0.6433	0.7832	-1.7651	0.484	1.1226	-1.0113	-0.8367	0.0035	0.34	-0.4405	0.2136	-0.9944	-0.7425	0.1407	-1.5651	-1.8402	-0.9068	-1.629	-3.1687	0.6996	-0.8981	0.5666	0.6939	1.2309	1.031	0.5973	0.9162	0.5706	-1.572	-1.2532	-0.6046	-0.2984	-0.6966	1.3522	1.2752	0.6753	-0.6125
orf19.6417	TSR1	0.522	-0.7953	0.3392	0.6436	1.004	-0.8269	-0.665	0.1199	-1.9836	-1.376	-1.45	-1.768	-1.2356	1.7878	-0.8436	0.1783	0.0949	-0.3669	0.9024	-0.4053	0.4435	0.4784	0.0949	-1.2478	-0.5524	-0.7268	0.7384	0.9069	-1.0138	0.0021	-0.3715	0.6948	0.0546	0.5358	0.4132	-2.1837	0.9536	1.5158	-1.1425	-1.0219	-0.7245	0.6523	-1.4993	-1.3163	-1.1415	1.0339	-0.3993	0.2079
orf19.5647	SUB2	0.276	1.0114	1.1119	0.818	1.701	1.5395	2.3148	1.7209	0.4984	1.2638	1.0318	-0.6545	-0.5405	-0.8246	1.7374	-0.772	-0.8351	-0.9783	-1.2472	-0.7418	-0.7677	-0.9733	-0.1586	0.1398	2.1037	2.9368	2.9443	-0.5719	-0.5365	-1.6596	0.0179	1.9014	1.6602	-0.6325	-0.4006	-0.5358	-1.0892	-0.6952	-0.4398	2.6512	ND	3.7433	0.0807	0.5942	0.4594	0.9724	1.0881	-0.7383
orf19.3116	LUC7	-1.02	0.01	-1.361	-1.533	0.3674	0.3758	0.4781	-0.3828	0.4845	0.5509	0.7156	-0.1404	-0.1919	-1.5892	-0.9894	0.9061	1.0047	1.315	0.6104	1.9221	1.0135	0.2861	0.2245	-0.4031	-0.9424	-0.5129	-1.6762	-0.9662	-0.444	-0.6181	0.83	-0.6279	-0.7578	-0.3255	0.7488	-1.3043	-0.7456	-0.3444	-0.6673	0.469	-1.0455	-2.6314	1.2441	0.3612	-0.9947	1.1765	1.2866	0.7701
orf19.4265	QRI1	-1.5508	-1.0296	-0.3818	1.2291	0.8285	0.5241	0.0457	-0.5546	-1.1878	0.1151	1.4961	0.3607	-1.428	0.7315	-0.4278	1.2022	1.1828	1.4275	0.2729	0.0633	-0.8577	-1.245	0.4789	0.2126	0.2437	0.8979	1.3965	0.9729	1.0352	ND	0.0132	-0.9168	-0.8438	2.4581	1.1475	0.0499	0.8172	1.7142	1.3317	0.6389	-0.4199	0.915	-1.7795	0.205	0.5661	-1.4112	-1.5898	1.414
orf19.2340	CDC48	ND	ND	ND	ND	ND	ND	ND	ND	ND	0.0007	0.2913	ND	ND	ND	0.5388	1.1541	1.2329	0.8943	0.7052	1.0125	ND	ND	-0.4588	0.6058	ND	ND	ND	ND	ND	ND	ND	ND	ND	ND	ND	ND	ND	ND	ND	ND	ND	ND	ND	ND	ND	ND	-1.1807	0.1681
orf19.1674	CDC53	-0.2163	0.4447	1.0589	0.5711	0.1028	1.0174	-0.2034	0.2125	0.4721	-1.0314	-0.841	-0.2722	0.8214	-0.5132	0.6563	0.7232	0.7741	0.4912	1.6377	0.2937	0.7679	1.0905	-1.6721	-1.3779	0.3135	-1.0322	-0.6881	1.3024	1.1346	-0.1872	1.0986	0.6027	0.8582	ND	-0.7262	0.6257	1.2457	-1.1416	1.1948	1.2146	1.1204	1.0203	0.6001	0.6546	1.2552	-1.1351	-0.8302	0.4764
orf19.7645	BPL1	0.5724	1.3503	1.635	0.8078	-1.1913	1.8635	1.5787	0	0.6004	-0.7961	0.0448	2.7848	1.7611	0.7455	-0.8379	-0.5662	0.5251	2.6275	1.7296	2.4607	-0.5362	0.4554	-0.4518	-0.3749	2.5365	1.4606	1.363	0.7478	1.4444	0.5139	0.5212	0.9095	1.7281	0.264	-1.2898	-2.2287	-0.6584	-0.5733	0.1709	-0.7126	0.7556	1.415	-1.7108	0.1783	-1.0557	-1.0629	1.2298	1.2694
orf19.4628	MPE1	0.1784	0.4207	-1.1151	-1.8506	-0.967	-1.2639	-1.2531	0.7368	-0.4395	0.0549	1.1935	0.3766	-1.0384	0.1481	1.511	0.3482	0.3286	0.4069	1.2719	0.9652	-1.236	-1.0026	-0.5207	-0.7315	1.4105	1.6326	1.5788	0.2405	0.0941	-0.6639	-1.034	-1.7767	-0.7874	1.027	0.6069	0.9762	1.0845	1.1065	-0.4745	0.4977	0.6244	0.4451	-0.8001	0.0389	0.4573	0.522	0.2348	0.4992
orf19.4413	CMD1	-0.9905	3.0641	3.2275	3.0833	0.7058	3.1144	2.0932	1.761	2.6625	1.8905	1.9045	0.8004	2.2365	-1.4738	-1.165	-0.3994	-1.101	0	-0.5893	0.5598	-0.8657	-0.7603	0.0608	1.3207	0.7523	2.2368	0.58	2.0737	3.2435	6.388	-2.9388	0.4438	0.2763	0.6123	ND	0.7503	ND	0.6682	1.2668	1.5942	3.8363	3.7672	-1.7169	-0.736	0.1719	1.2318	4.8396	5.0066
orf19.6239	KIN28	0.5241	-0.746	-0.9946	0.1625	1.2559	-1.0459	-0.8322	0.2802	0.483	-1.2918	-0.4121	-0.0257	0.4816	0.8896	0.5466	0.528	2.2075	1.487	1.4604	1.3743	0.2078	-0.2608	-1.5257	-0.508	-0.8951	-1.676	0.0982	0.6684	-0.4988	0.8524	1.6189	0.3335	0.0805	-0.8043	-1.203	0.1215	1.3174	1.2232	0.8186	-0.5318	-1.0785	0.6546	-1.3036	-1.6043	1.0604	-0.1051	-0.4103	-0.4576
orf19.4618	FBA1	ND	ND	ND	ND	ND	ND	ND	ND	ND	0.2362	0.413	ND	ND	ND	0.7977	-0.8313	-0.8062	0.5394	-0.9816	0.5771	ND	ND	-0.958	-0.4692	ND	ND	ND	ND	ND	ND	ND	ND	ND	ND	ND	ND	ND	ND	ND	ND	ND	ND	ND	ND	ND	ND	0.0047	-0.4789
orf19.1305	TRM5	ND	ND	ND	ND	ND	ND	ND	ND	ND	-0.717	-0.9878	ND	ND	ND	2.6662	-0.6847	0.8645	-1.281	0.2263	0.1867	ND	ND	0.3323	-0.4591	ND	ND	ND	ND	ND	ND	ND	ND	ND	ND	ND	ND	ND	ND	ND	ND	ND	ND	ND	ND	ND	ND	-1.1375	0.3088
orf19.4582	SKI6	1.367	0.5197	1.2981	1.4328	0.9115	0.8451	1.158	-0.187	-1.2369	0.6663	0.6906	-0.552	1.4311	2.3739	0.295	0.5286	0.5617	0.2551	0.7467	0.7925	-0.9546	-0.8661	1.4906	0.9778	-1.6401	0.3693	-0.5058	0.0624	0.7732	-0.4315	0.2137	1.1178	1.3726	-1.0175	0.014	0.7406	1.0712	-0.183	0.8004	1.5187	1.1361	0.6506	0.1287	-0.8647	-1.4216	-0.4174	-1.5128	0.1787
orf19.3166	DOP1	1.047	0.8319	1.3316	1.3743	2.3694	0.1151	0.1351	1.2098	-0.577	0.0007	0.0007	-1.5209	0.0824	1.803	-0.3906	-1.0384	0.0747	-0.6684	0.6332	-1.2816	-2.1208	-1.9146	0.6666	-0.8609	0.0569	0.5273	0.4869	2.9101	ND	2.1208	-2.4328	-2.8889	-1.6576	-1.6725	0.5917	-1.045	2.1262	1.3302	0.2874	2.2941	1.922	2.8778	0.0411	0.0075	-1.3909	0.9238	0.1961	0.223
orf19.7422	LCP5	0.056	-0.3036	-1.453	-2.6295	-0.6805	-0.4472	-0.6493	0.232	-0.2197	0.6789	0.3826	1.1274	0.342	0.7693	0.4088	0.6223	-0.7989	-0.9593	0.0274	0.7976	-0.1286	0.0079	0.4001	1.0973	-0.741	-1.0681	-2.3698	0.8983	0.5726	0.7667	0.7986	1.5556	0.7481	0.1175	-1.0418	0.5372	-1.4647	-1.0457	-0.8485	-0.8933	-0.7446	-3.3123	1.2985	0.7792	-1.394	0.5686	-0.8395	-1.2055
orf19.5432	TPT1	2.5124	0.6479	2.4835	0.5293	-0.7802	1.8604	1.4534	0.1406	0.8899	1.4955	1.7845	1.5562	1.949	-2.3756	0.795	0.9567	0.7318	-0.6373	0.0327	0.8595	-0.5803	0.2363	0.2868	1.0924	0.3063	1.1188	0.6932	1.5025	0.6949	0.9768	-1.7214	0.0085	0.5539	-1.4873	2.6164	-0.8907	2.0438	3.0803	0.9711	0.0062	0.3403	2.0143	0.4374	0.3462	0.3834	1.2893	0.6124	1.6297
orf19.1803	CDC43	0.7979	0.1104	0.3617	0.4292	0.3962	1.3911	1.1869	0.1907	0.5981	0.0007	0.0007	0.9836	1.6389	0.0876	0.4822	0.5093	0.3855	1.4292	0.4225	1.1627	-0.9709	0.1238	1.1849	0.658	1.8474	0.7095	0.6361	-2.0304	-0.4048	-0.5334	2.1815	0.1198	0.3561	1.4808	1.5146	0.147	0.9791	0.9351	-1.1684	-0.3748	0.1072	0.5097	0.9131	1.229	1.8855	0.1648	-0.591	0.6249
orf19.1814	STT4	-1.3042	0.3203	-0.5352	-0.9572	-0.7575	-0.802	0.099	0.2705	0.4852	-0.1227	-0.4506	-1.2666	-1.7961	0.7945	-2.1615	-0.8754	1.6299	2.3218	1.8203	1.201	-0.7937	-1.3001	-2.078	-2.6579	0.9706	0.7321	0.6217	-2.0646	-2.8845	-3.6773	0.455	1.5649	1.997	2.8858	-1.319	0.0725	-1.7081	0.4901	0.6725	0.5297	-0.4769	-0.9502	1.8449	1.6058	1.8129	1.2644	2.0696	1.5971
orf19.2402	SSU72	ND	ND	ND	ND	ND	ND	ND	ND	ND	0.0392	0.0007	ND	ND	ND	1.2984	0.2363	0.3073	-0.4439	0.2795	1.3402	ND	ND	0.493	0.351	ND	ND	ND	ND	ND	ND	ND	ND	ND	ND	ND	ND	ND	ND	ND	ND	ND	ND	ND	ND	ND	ND	-1.9161	0.4334
orf19.4582	SKI6	1.1666	0.2105	0.753	0.5845	0.5867	-1.2244	0.3811	0.3824	-0.9578	0.0007	0.0007	-0.6199	-1.7546	1.8294	0.7241	0.2398	0.1849	0.222	-0.6986	-0.6731	-1.0255	-1.0173	0.3732	-0.9978	-0.5326	0.3803	0.3406	0.1067	-0.7603	0.6555	0.1089	-1.5551	-1.5083	0.7616	1.2703	-1.3203	0.983	0.4713	0.6642	1.2829	-0.4701	-0.2607	-1.6689	-0.253	-1.5171	-1.586	0.1362	-0.2566
orf19.4373	FMN1	-1.1471	-1.5352	-0.9012	-0.8651	0.9871	0.6328	0.2782	-0.5825	-0.2568	0.6586	0.4148	-1.4386	-1.3717	-0.4731	0.7058	1.1232	0.3978	0.0675	0.2648	1.5396	0.4827	0.6259	-0.457	-0.2519	-0.378	0.7809	0.9449	-1.4045	-0.9421	-0.7983	0.1534	0.1666	-1.0294	-0.4932	0.366	-1.2078	-1.5137	-1.8028	-1.6267	-1.9407	2.1684	-0.2501	0.3094	1.4698	0.8343	0.642	-0.8535	-0.5279
orf19.516	RFT1	ND	ND	ND	ND	ND	ND	ND	ND	ND	0.0007	0.0008	ND	ND	ND	0.2567	-0.7848	0.369	-1.7628	-0.5736	0	ND	ND	-0.4265	0.0277	ND	ND	ND	ND	ND	ND	ND	ND	ND	ND	ND	ND	ND	ND	ND	ND	ND	ND	ND	ND	ND	ND	0.8394	0.2509
orf19.5528	MOB1	1.6655	0.4305	1.83	1.1818	1.9674	0.667	3.147	1.7342	-1.0272	0.3961	0.3043	-0.6994	0.3225	2.0359	0.4234	0.011	-1.1243	0.5952	0.4212	-0.6041	0.7332	1.6458	-1.1898	-1.0518	-1.0908	0.0674	0.4188	1.1096	1.2396	1.2045	2.3681	1.478	1.2325	1.7045	-0.6053	0.9332	2.259	0.2393	1.221	1.2798	-0.4987	-0.2904	-0.8658	-1.2224	-1.5824	-2.1023	-2.4968	-0.7262
orf19.2369	ORC5	1.0746	-1.3723	-1.2406	-0.6258	0.8636	0.1316	-0.5522	0.1887	0.7989	0.8963	1.5605	-0.8823	-0.7147	-0.18	-0.4708	0.3249	0.1054	0.048	-1.1293	2.1008	-0.6795	-0.0771	-0.4756	1.2312	-1.0779	-0.7672	0.3646	0.6508	0.5925	0.6797	0.3683	1.2268	0.0798	-2.0539	-0.3016	0.4404	1.5379	1.7661	0.6285	-0.711	-0.3812	1.0611	2.1181	-1.6311	-0.5913	0.3795	0.2094	-1.176
orf19.3673	TRS23	-0.5889	0.0224	-0.1887	-1.044	0.1425	0.1382	-0.4188	-1.0856	0.7913	0.1687	0.2293	0.8333	0.1214	0.4532	-1.1426	1.1546	-1.7433	1.0956	1.1706	0.8581	1.3704	1.3418	0.968	1.4747	0.5124	0.6934	-0.262	0.8289	0.3684	0.6367	1.4928	-0.989	0.3398	0.9256	1.412	0.6361	-0.8711	0.271	-0.2236	0.5221	-1.4494	-3.3027	0.4393	0.8157	-0.7169	0.7306	-0.783	-0.8608
orf19.603	IMP4	ND	ND	ND	ND	ND	ND	ND	ND	ND	0.4786	0.822	ND	ND	ND	0.7648	-0.4563	0.4191	0.3275	-0.7	0.8401	ND	ND	0.2023	1.1448	ND	ND	ND	ND	ND	ND	ND	ND	ND	ND	ND	ND	ND	ND	ND	ND	ND	ND	ND	ND	ND	ND	2.3542	0.4218
orf19.7618	PNO1	-1.3806	1.0275	1.8437	1.5049	-0.2746	2.2071	1.7447	1.054	0.6881	0.5549	1.3105	1.0193	0.7529	0.2311	0.1001	0.6845	-1.7202	-2.0291	-2.4834	-1.0485	-0.6186	-1.3247	-1.6191	-0.1059	2.0343	1.3501	1.7807	0.4881	1.0659	1.3061	1.4374	0.4899	1.1347	1.4727	-1.4561	-1.1532	-1.7957	-2.493	-2.3565	0.1213	0.5712	0.6641	-1.1884	0.349	0.0306	0.798	1.0345	0.3402
orf19.5232	BRX1	ND	ND	ND	ND	ND	ND	ND	ND	ND	0.0008	0.0008	ND	ND	ND	0.1655	-0.0699	-1.6244	-2.4544	-0.5902	0.1778	ND	ND	0.144	0.3614	ND	ND	ND	ND	ND	ND	ND	ND	ND	ND	ND	ND	ND	ND	ND	ND	ND	ND	ND	ND	ND	ND	1.4525	0.5846
orf19.5567	POP4	0.7118	0.6436	1.4027	2.7943	0.1081	0.9097	2.0737	1.1183	0.0453	1.1835	0.2072	0.5872	2.3509	-0.5316	0.1459	0.0331	1.0161	0.2348	0.1057	0.3987	0.5187	0.644	0.0279	-0.7717	0.3705	1.1777	0.8317	0.7234	0.0759	0.3077	0.1758	0.7056	0.9276	-0.7087	0.7075	-1.2165	1.0023	0.9051	0.9466	-0.2306	-0.8336	0.5074	-0.7268	0.7138	2.6737	-1.8618	0.342	-0.2982
orf19.706	NMD3	-0.4672	-0.4364	-0.7786	-0.712	-0.169	-0.2902	0.5286	-0.3997	-0.7431	0.8419	0.9191	-1.3706	-0.3796	-1.8058	-1.112	-0.2373	-0.865	-0.9034	0.9369	-1.6042	-1.2954	-1.1184	0.2338	0.0046	0.2123	0.8466	1.0211	-0.615	-1.6338	-1.4983	0.489	-0.9264	-1.1833	0.1859	0.8393	0.3042	0.4295	-1.0651	0.2936	-1.0222	-2.0186	-1.6745	-0.2031	0.914	0.5398	-1.3731	-1.2298	0.1099
orf19.5465	YJU2	1.0458	1.9946	2.9176	2.7561	1.5176	1.0192	1.9	0.4357	3.078	0.1543	0.0152	2.7722	1.7727	0.4498	-0.7954	-0.5234	0.3287	-1.6054	0.4232	0.9781	0.4914	0.8927	-1.0024	-0.5344	0.5428	1.1828	0.7346	0.7632	1.351	1.2387	3.3748	3.5397	2.7339	-1.6822	1.0797	-0.7993	0.6084	1.2346	3.5143	-0.3397	0.0301	1.0495	0.0215	-1.4387	-0.7619	0.0417	0.4973	1.3542
orf19.5076	PFY1	0.3923	-2.1349	-2.517	-0.6017	0.2558	-0.8394	-1.6333	-0.9956	0.8178	1.2849	0.258	0.4628	-0.8378	-1.178	0.2978	0.2786	0.1873	0.4274	0.0864	0.3135	-1.8917	0.0017	0.563	0.5834	-2.3118	-2.1081	-0.5947	0.1997	0.0778	0.3016	1.1851	0.7732	0.9047	1.4093	0.1417	-1.0885	0.7215	1.8421	-0.3872	-0.5256	-1.583	0.398	-1.2719	-1.567	-1.1114	-0.5627	-1.9337	-1.854
orf19.6642	YIF1	1.6595	-0.5142	-0.7126	-0.9842	ND	1.6347	2.0916	-0.9871	0.2544	1.7668	1.6323	-2.7646	-1.3941	-1.1776	1.6523	2.0029	0.6961	0.4159	1.4002	0.8308	1.2816	2.0877	2.1617	1.6777	-1.0863	-1.0276	-0.9135	-0.422	-0.1078	-0.2918	0.7194	-1.0565	0.5891	-2.1541	1.6224	0.7299	1.1179	0.884	1.7482	0.3227	1.1661	0.7573	1.218	-0.5593	1.0582	-0.3174	0.0504	1.707
orf19.5817	BET3	-1.3658	-1.3998	-1.525	-1.4545	0.2462	0.5882	-0.5813	1.3644	-1.3199	0.6003	0.7452	0.265	-0.8545	0.5161	1.264	-0.0754	0.9948	0.0238	1.7675	0.1004	0.4768	0.216	0.155	0.4234	-0.8687	0.161	-0.2505	0.1469	0.84	-0.6623	0.6014	0.6552	0.7341	2.05	0.7483	0.333	-2.9406	-0.9527	0.0934	0.0489	0.1657	0.0516	0.6824	1.4216	0.7012	-0.3327	-0.3112	0.7537
orf19.6025	YGL047W	0.6034	1.2648	1.5761	1.4286	-1.3984	1.1781	0.644	1.0573	1.0024	-0.4397	0.3201	0.6433	1.5993	1.5293	5.8847	6.0161	-1.3153	0.3993	-0.3494	0.6385	-0.395	0.6488	1.0466	0.7055	1.9163	1.9511	0.7819	0.9459	1.1847	0.9192	-0.8346	-0.6583	0.8935	-1.6831	0.1678	-0.8412	0.549	1.6629	0.7678	-0.1634	0.6435	0.982	-0.2814	-0.6508	0.6451	0.1602	1.352	-0.7153
orf19.1815	TIF6	1.6031	-0.3852	0.5185	0.2126	0.4034	-0.7146	-0.7402	1.1262	-1.2182	-0.8232	0.0252	0.8511	0.3783	0.1834	-1.2391	0.1031	1.1655	0.5899	0.8667	-1.1011	-0.352	0.7785	0.7193	-0.6892	-0.8929	-0.7416	0.2575	0.0746	-1.1881	0.1767	1.5924	1.159	0.5606	0.7833	1.1688	0.0656	1.6291	1.0181	0.4896	-1.197	-0.9329	0.0788	-0.6229	-1.1241	0.4307	0.2744	-1.0507	-0.744
orf19.3951	YIP1	0.3743	0.2955	-0.591	-0.6003	2.5654	2.6383	3.7528	1.3077	0.154	1.9998	1.2851	0.9084	0.6264	0.7615	1.4937	1.7896	0.8011	0.6846	0.8153	1.3416	4.9875	4.8493	2.1527	1.3494	0.3656	-0.0878	-0.332	0.5366	0.4313	0.0141	0.4874	0.5721	0.6242	0.1022	-0.3603	0.3205	0.2056	1.1558	0.9022	0.4087	2.1555	1.8339	-0.4585	-0.8337	0.4558	0.5824	0.5485	0.8904
orf19.1164	GAR1	2.06	0.1745	0.1964	1.0492	ND	0.3651	1.6711	3.2032	0.4029	1.6672	2.0797	-0.1901	0.693	3.4553	0.0129	-0.3567	-1.1703	-1.6858	-1.1187	-1.5682	3.145	1.8024	0.3651	0.6464	0.5143	0.3463	-0.4917	0.4973	1.1493	0.048	1.7464	-2.7764	0.0407	1.8864	-0.7811	-0.1712	ND	ND	ND	1.246	ND	-2.3851	1.0326	1.5171	ND	-2.3833	-1.1983	-0.4758
orf19.337	VTI1	ND	ND	ND	ND	ND	ND	ND	ND	ND	0.8562	2.5569	ND	ND	ND	0.1758	0.1267	0.0563	-1.496	-0.59	0.6268	ND	ND	0.7936	-0.3874	ND	ND	ND	ND	ND	ND	ND	ND	ND	ND	ND	ND	ND	ND	ND	ND	ND	ND	ND	ND	ND	ND	-0.5982	2.5044
orf19.2677	GPI16	0.407	-0.7988	0.1667	0.3799	1.7847	-1.2377	-1.5537	-0.4348	-1.9365	-1.0018	-0.9918	-1.409	1.3198	1.3014	0.8207	0.0163	-0.5464	1.182	0.9237	0.8281	0.8261	1.0259	0.3892	0.4002	-1.5861	-0.3672	0.1521	-1.1506	0.5355	0.3826	2.2098	1.6114	0.1834	-1.3051	-1.5017	0.3265	1.1251	0.6172	-0.9	0.385	-0.3698	0.4402	-0.8254	-0.9829	-1.9407	-0.8421	-0.9675	0.9396
orf19.5010	DIM1	ND	ND	ND	ND	ND	ND	ND	ND	ND	-0.552	0.3345	ND	ND	ND	-1.0913	0.1369	-1.1251	0.171	0.4688	0.9867	ND	ND	-0.8945	-1.0967	ND	ND	ND	ND	ND	ND	ND	ND	ND	ND	ND	ND	ND	ND	ND	ND	ND	ND	ND	ND	ND	ND	0.18	-0.7857
orf19.5013	PCM1	2.2284	1.0524	1.5228	1.2769	-1.4604	1.7986	1.6905	-0.9133	1.6898	0.9529	-0.7089	2.1154	1.0191	-1.0732	0.2324	0.6046	-1.498	1.4231	0.3382	1.0405	-0.5584	-0.27	-1.3422	-0.2604	1.5659	2.0529	2.1131	1.391	2.2401	1.9768	-1.7185	1.2432	1.8826	1.6684	-1.0696	1.5138	0.6971	0.3366	0.8515	1.3115	0.8488	0.8435	-0.47	-1.5389	-1.0173	-0.5612	1.4131	0.9246
orf19.6879	SEN34	0.0758	-1.6394	-0.8091	-0.5859	-0.8465	0.1063	-1.0332	0.2732	0.2859	-1.0533	0.2851	0.8337	-0.9806	0.4412	-1.1194	-1.4872	0.54	-0.4788	0.9716	-0.6633	0.074	0.4187	-1.5395	0.0946	0.5194	1.023	1.1558	1.5317	1.5083	0.8781	0.3506	1.2629	0.8654	1.0817	-1.0336	0.1498	0.2335	-1.5366	0.036	-0.5099	-1.603	-0.3647	1.5108	-0.3169	0.7341	-0.9337	0.0506	-1.0003
orf19.3590	IPP1	-0.4119	0.0112	0.3108	0.1922	1.8156	0.5652	-0.6643	0.6261	0.3626	0.803	1.0776	-1.0039	0.4248	2.1447	1.8881	0.7978	1.3285	0.3306	1.8921	0.3397	-1.238	-1.1788	0.7001	0.787	-1.1423	-0.6709	-0.7409	0.1035	-0.7059	-2.0433	-0.2066	-0.4593	0.9135	2.112	-0.9133	0.3099	1.9032	1.0482	0.9749	1.5249	1.5336	1.4168	-0.9063	0.1207	-1.3126	0.0914	-1.3883	1.7966
orf19.661	KRR1	0.4225	-0.6031	-0.5792	-0.2463	0.5498	0.1539	0.8002	-0.1547	0.0586	0.0007	0.7973	0.732	0.0275	0.6812	-0.311	-0.2319	1.6913	-1.6277	0.0546	-1.3482	-0.7706	-0.8476	0.2199	0.0238	-1.7513	0.5496	0.9786	-0.6361	0.5261	-0.5007	ND	0.9445	0.3304	1.105	-1.0368	-0.5693	-1.3294	-1.9101	-1.8006	0.9544	-1.138	0.121	0.2287	0.4493	0.9566	0.2778	-0.9155	0.1418
orf19.7644	APC11	0.7947	0.8219	0.8951	0.6674	ND	0.6305	0.7387	0.2748	0.9863	0.0007	0.0007	0.3337	0.8532	0.8649	-1.362	0.1225	-0.698	0.3589	0.2745	-0.2377	-0.5952	0.5766	0.08	0.0638	0.3534	0.4611	2.0025	1.5476	-0.137	0.1434	ND	-1.1676	0.1875	ND	0.9896	0.2149	0.7903	0.6139	0.4069	1.074	0.0442	0.2489	0.0828	0.7103	ND	0.6043	0.9166	0.4976
orf19.6424	UBC9	-1.0971	0.2179	0.4983	0.3421	0.9277	0.5857	0.033	0.4686	0.6531	-1.2579	0.0873	0.4515	-0.5653	1.6916	-0.5315	0.3403	1.4334	0.7824	0.7805	1.0365	1.6115	1.5361	1.1029	0.8358	2.2402	1.5521	1.757	0.2538	1.1378	0.6764	1.9017	1.1074	0.8412	1.2628	0.9002	0.339	-0.5603	-0.3865	0.7082	-1.7175	0.4268	-0.1467	-0.9148	1.4726	1.2655	0.6766	-0.7636	-0.4892
orf19.1299	RPN6	0.0462	0.1308	0.5749	0.9734	2.3183	-0.7251	-0.6411	0.4889	-1.0257	0.4223	0.6936	-1.2487	-0.9852	1.5197	1.707	1.1096	-0.5906	1.0063	-0.6992	-0.8263	0.6017	-0.8605	1.4894	1.0865	-1.1208	-2.7017	-1.3092	3.0722	0	1.7751	2.1129	0.3769	0.8213	1.8957	0.3457	-2.5012	1.152	0.4922	0.6572	-0.6271	0.5858	-0.8446	-1.0037	-0.3624	-2.1252	-0.9018	-1.6822	-1.3794
orf19.2720	CCT4	ND	ND	ND	ND	ND	ND	ND	ND	ND	0.0282	0.4923	ND	ND	ND	-2.0285	-2.3504	-2.1659	-2.9557	-1.2183	-3.1806	ND	ND	-1.2008	-1.3025	ND	ND	ND	ND	ND	ND	ND	ND	ND	ND	ND	ND	ND	ND	ND	ND	ND	ND	ND	ND	ND	ND	ND	1.0985
orf19.1742	HEM3	ND	ND	ND	ND	ND	ND	ND	ND	ND	0.0008	0.0008	ND	ND	ND	-1.3047	-0.7009	-1.4329	0.6274	-1.3795	-1.1684	ND	ND	0.9527	-1.0037	ND	ND	ND	ND	ND	ND	ND	ND	ND	ND	ND	ND	ND	ND	ND	ND	ND	ND	ND	ND	ND	ND	-0.3268	0.2227
orf19.526	NHP2	-1.0851	-0.5991	-0.9087	-0.8137	1.099	-0.2012	0.1109	-0.2475	-0.6511	-0.9331	-0.9173	-0.2417	-0.2088	0.3772	-0.1095	0.4353	-1.2629	-1.2041	0.1054	0.8827	0.1183	-0.7486	0.3103	0.1412	0.1294	-0.6262	0.3771	-0.8829	-0.8872	-0.7673	1.9553	0.5832	-0.538	1.4436	-0.9365	0.1054	-1.9964	-1.6579	-0.8813	-1.2842	-0.9678	-0.3951	0.4084	0.6413	-1.0632	-0.1764	0.8777	-0.5995
orf19.7477	YRB1	ND	ND	ND	ND	ND	ND	ND	ND	ND	1.4264	0.0769	ND	ND	ND	0.2418	-0.7923	-0.6592	0.3652	-1.0556	0.1359	ND	ND	0.3001	-0.4952	ND	ND	ND	ND	ND	ND	ND	ND	ND	ND	ND	ND	ND	ND	ND	ND	ND	ND	ND	ND	ND	ND	0.7504	0.1592
orf19.6910	PSF1	0.203	0.1739	-0.0564	0.3302	-0.9923	0.8421	0.3864	1.0343	0.5026	1.4671	1.6278	-0.1967	0.4934	-1.3596	-1.3396	0.3527	1.1863	0.9597	1.4909	1.9085	0.3718	-0.8053	0.3242	0.9972	0.306	0.0433	-0.4065	-1.103	1.1017	0.786	0.105	-0.867	0.938	0.7265	0.1145	0.5316	0.1008	0.5786	0.6963	0.2965	0.035	0.6863	0.1361	1.4719	0.0338	1.1601	0.9061	2.2433
orf19.2488	FAL1	0.2302	-1.0365	-1.1774	-0.4423	-0.1043	-0.744	0.2651	-0.7741	0.0343	0.085	0.0008	-1.1055	-1.2574	-1.0087	-0.6981	-0.2868	0.3755	0.1597	-0.6337	-0.0963	-0.483	-0.7998	1.317	-0.5949	-0.4121	-0.587	0.0414	0.0515	0.3345	0.0987	3.5116	0.2315	-1.7165	0.3252	0.3667	0.4994	-1.25	-1.3368	-0.3404	-0.4665	0.3883	0.1583	0.0762	0.5485	1.2951	0.2941	0.8569	0.3507
orf19.269	SES1	-0.509	-0.4956	-1.2026	-1.9176	1.2354	-0.9785	-1.0765	0.067	-0.5354	0.008	-0.7423	-0.8745	1.2446	1.4911	-0.7699	0.0432	0.1468	0.6208	-0.427	-0.808	1.5833	1.3736	0.2152	0.7941	-0.9373	-0.8554	-0.6187	0.5589	0.6291	-0.3917	1.1099	0.936	0.3631	1.4268	-1.2774	-1.6192	-1.0221	-1.4516	-0.9102	-0.6456	-0.9815	-2.4993	0.8747	0.9568	0.5615	0.4502	-0.6807	-1.0011
orf19.6749	KRS1	0.2852	0.5053	0.0245	0.2544	-1.5114	-0.883	1.7356	-0.3607	-1.7294	0.0008	0.0008	0.4477	2.443	0.279	0.5375	0.3559	-1.1831	0.0083	0.7853	-0.9455	0.3733	0.0599	-0.6127	-0.1102	-1.0572	0.918	0.2953	ND	2.5532	0.0365	0.9338	1.219	0.8224	2.1438	-1.1701	0.9568	ND	ND	-1.3492	0.0619	-0.8754	0.4718	1.0169	0.4182	2.2159	-1.0667	0.7967	0.3364
orf19.2803	HEM13	-0.624	-1.384	-0.8905	-0.6421	0.8076	-1.3614	-1.5432	-1.2637	-0.7182	-1.0309	-1.6253	-1.3107	0.0908	0.314	-1.3723	0.0463	1.5733	0.1642	0.5292	-0.2208	0.2609	0.741	-0.6986	-0.2063	-1.7626	0.2958	0.469	1.3392	-1.3238	0.2717	2.0469	0.3837	-0.4189	0.1205	0.5393	0.53	0.1154	0.0194	-1.0402	0.6506	-1.277	-0.5216	0.5756	1.3915	-1.6984	-1.4217	-2.1654	2.1497
orf19.5360	RPC11	1.093	1.2809	1.0808	1.1738	1.783	1.1155	2.2862	0.8116	1.4363	0.0007	0.0007	0.4437	1.0831	0.2414	-1.1515	0.0253	1.0187	0.5902	0.6107	-0.7605	0.5647	0.0687	-0.8415	0.105	0.9104	1.8217	0.2422	0.3437	1.4972	0.1918	0.5995	0.5657	0.8847	-0.7546	1.843	0.0388	0.0811	1.1779	ND	0.1586	0.9855	1.0795	0.0386	-0.8463	-0.517	1.8266	0.3487	-0.1891
orf19.5369	HEM12	0.3536	0.8681	1.0494	3.8264	0.165	0.4085	1.2287	0.1735	0.5754	0.2569	0.0008	0.7176	0.7174	0.538	0.0194	-0.2593	-0.2284	-0.909	0.1586	0.4629	-0.8315	0.1614	-0.1229	-0.4249	0.391	0.7664	0.1499	1.1355	0.3573	0.8821	0.1959	0.7509	1.0221	0.7768	1.224	-1.3609	-0.7862	0.5256	0.3383	-0.9343	0.3694	0.1735	1.1147	-0.1898	0.9629	1.0633	2.6377	0.6417
orf19.6529	CDC34	1.3838	-0.4594	-0.173	-0.2946	-1.1799	-1.5582	-2.0512	-0.8667	0.6446	-1.0207	0.7783	-0.0687	1.5708	0.7297	-1.2866	-0.4882	0.5622	1.0714	-1.0881	1.6853	-1.4429	-0.7719	-0.2631	-1.0451	-1.4491	-0.902	-0.5114	-2.0435	0.2372	-0.1451	-0.9662	0.7627	0.1766	0.3886	-0.4541	0.9572	0.6838	0.3298	0.4283	-1.2771	-0.1588	0.7814	-0.5153	0.3665	0.1729	-0.4648	-0.4623	1.311
orf19.6828.1	SSS1	ND	ND	ND	ND	ND	ND	ND	ND	ND	-1.5615	-1.3919	ND	ND	ND	0.188	2.2969	1.4634	-1.0115	1.1826	1.2259	ND	ND	-0.6641	1.1539	ND	ND	ND	ND	ND	ND	ND	ND	ND	ND	ND	ND	ND	ND	ND	ND	ND	ND	ND	ND	ND	ND	0.2163	-0.4435
orf19.6828	RRP1	ND	ND	ND	ND	ND	ND	ND	ND	ND	0.0008	0.0008	ND	ND	ND	0.2746	0.3872	0.371	0.7089	0.9647	1.0545	ND	ND	0.0752	0.4653	ND	ND	ND	ND	ND	ND	ND	ND	ND	ND	ND	ND	ND	ND	ND	ND	ND	ND	ND	ND	ND	ND	1.3417	0.8464
orf19.3034	RLI1	-0.6262	-0.8675	-0.5102	-0.831	0.3694	-0.7688	-0.252	-0.8066	0.3855	-0.3983	-0.6281	-0.8906	-0.5799	-0.2068	-1.0571	-2.0703	-1.2721	0.9645	-1.1992	2.1115	-1.0502	-0.8985	-1.9458	-1.9279	0.5809	0.3134	0.1449	-1.0949	-1.6473	-0.1325	0.5641	-0.1109	-0.2572	-0.1821	0.2289	-0.2743	-1.9096	-1.1823	-1.4525	-0.7367	-0.8429	-0.503	0.5931	0.7352	-0.6055	0.3366	0.2769	-0.8827
orf19.3242	TAF10	0.4983	1.5308	2.0699	1.7413	-0.9652	1.3515	1.0226	0.4366	0.6758	0.8364	0.5457	1.1744	-1.109	0.6012	0.2284	0.8269	2.8398	2.5768	2.6941	2.9743	1.7792	2.0609	1.9854	0.6641	1.668	1.5172	1.7675	-1.3316	0.0929	0.0083	-1.1831	-1.055	0.8544	-1.0613	0.7624	1.0908	-0.2908	0.104	-0.566	0.7893	0.0206	0.1433	0.0065	1.415	-0.3897	0.3164	1.6271	-0.7454
orf19.1378	SUP35	0.1123	1.0301	0.5187	2.7231	-1.2838	1.2708	1.7836	0.4722	-0.2687	2.0585	1.896	1.7574	0.6401	0.4505	0.1215	4.6636	1.1405	-0.4927	0.616	0.6377	-0.8711	-0.4569	0.82	1.0853	1.2071	1.396	1.0613	-0.6351	-1.4079	-0.3652	-1.1467	0.96	1.196	1.377	-1.2942	-1.5475	0.4659	1.3516	2.1694	0.3352	1.4755	1.4889	0.1407	-0.5188	-1.4493	0.2823	0.3634	1.7817
orf19.3128	SLY1	1.2195	0.2018	-0.119	-0.2324	-0.4873	0.956	1.1222	1.2555	0.1891	1.6852	1.7995	1.0328	0.1462	0.1795	0.5314	0.2497	-1.1665	-1.3899	0.6962	0.8358	0.0219	-0.5666	0.0886	0.9751	0.6584	0.4173	0.0411	0.6625	0.5413	0.3085	0.2507	0.5321	1.4014	0.9237	0.4905	-0.3229	0.1669	0.9311	0.6818	0.5005	0.7796	0.8566	-1.6085	0.7551	0.5361	1.8883	0.291	0.9679
orf19.4005	YDR196C	0.0479	0.2748	0.9553	0.8774	-0.5943	0.3367	0.4551	1.5425	1.2231	0.5463	0.3693	-0.6704	0.2498	0.7103	0.7059	2.369	1.6266	1.7745	1.724	1.6858	3.2869	3.5239	2.0499	1.9129	0.689	0.7417	0.5609	0.0671	-0.6267	0.7435	0.1775	0.4063	0.7141	2.1381	-0.2809	-1.5581	-1.5565	-1.4294	0.2041	-0.4823	-0.7828	-0.6561	-0.319	1.8418	0.2909	0.8883	0.7408	0.4944
orf19.401	TCP1	0.182	0.7475	-0.9854	-1.2362	2.4404	-0.7362	-0.7292	0.0358	0.1411	0.0975	0.0008	0.3245	-0.9268	0.3043	-0.7166	-1.8944	-1.5087	-0.9426	-2.6554	-1.9282	1.3175	0.8402	-0.3022	0.5169	0.8194	-0.7181	-0.315	-1.7379	0.1636	-1.1879	0.9565	0.6511	1.4172	0.3294	-0.8372	-1.0109	-2.3203	-1.4343	-1.8323	0.5688	-0.1981	-2.2222	1.9738	1.1303	0.948	0.3138	0.8006	0.1887
orf19.528	SEC26	0.744	0.0566	-3.1276	-3.3152	1.0723	-0.3983	-0.6079	0.5963	0.3953	0.6468	0.3101	1.9229	0.6368	1.0388	1.0193	0.85	0.1719	0.2264	0.5007	-0.8841	-0.4979	0.6294	1.9509	1.3091	-0.8842	-1.2533	-1.0426	0.6258	1.1825	1.7716	1.0486	1.0762	2.087	1.528	0.7318	1.8873	-0.8783	-1.3073	-1.072	-0.444	0.5188	0.2674	0.2398	0.4757	1.508	0.6778	-1.241	-1.629
orf19.672	PRP28	0.384	-1.8015	-2.6086	-0.1521	0.5462	0.0333	0.2804	0.9244	-1.8679	1.7851	1.3998	0.4799	-0.701	0.8634	0.9618	0.0317	1.0634	1.7174	0.652	0.4879	-0.2247	0.1969	0.731	0.6481	-1.2156	-0.5082	0.0604	1.155	-0.1412	0.2485	0.8268	1.0846	0.4036	1.7629	-2.3367	1.6488	0.4274	0.9974	-1.2016	0.4597	0.4099	1.1102	-1.023	-2.1163	-1.4793	0.6304	-0.9314	0.5236
orf19.4078	RRP45	-1.731	0.5635	1.7104	1.0377	0.4329	0.62	-0.7778	0.9439	0.6822	-1.8937	-1.352	1.658	1.4023	0.7697	-1.0708	-0.3989	0.4742	1.7626	-0.4383	0.4025	-0.3176	-1.1612	-1.5908	-0.346	0.1287	2.3211	1.9813	0.2801	1.4501	0.5629	0.0034	1.1244	0.0152	1.2233	0.3959	3.1202	0.4784	-1.6417	-2.1644	0.1031	0.1277	-0.2856	0.5808	1.8586	-1.2575	2.0119	-1.0772	-1.1664
orf19.2799	GPI8	0.8363	-0.9656	-0.3894	-0.5058	0.5251	-1.0005	-1.2368	-2.1545	-0.7318	-0.7243	0.294	0.0209	0.3913	0.5176	0.8259	0.177	-1.0729	-2.0693	-1.9065	-2.87	-0.2775	-1.0891	0.3811	0.2302	0.1503	0.2231	0.6276	-1.3543	-0.9021	0.3095	0.8644	0.7464	0.4688	0.7115	-1.5605	-1.3592	0.7492	0.7261	0.0841	0.0403	-0.6997	0.3445	0.1522	-1.779	-0.6168	-0.5945	-0.9235	0.8012
orf19.4726	FRQ1	0.4137	-0.099	-0.3039	-0.0484	0.0475	-1.2104	-1.6546	-1.0616	0.021	-0.5824	0.4962	-1.5875	-1.4157	-1.2737	-1.8082	-0.9468	-1.3121	-1.4157	-0.743	-1.8095	0.166	0.0178	0.8368	0.6716	0.1574	1.2428	1.0451	-0.5303	-0.9391	-1.0797	-0.349	0.4004	-1.4627	0.0419	-0.8144	-1.4495	0.9731	0.4331	1.4574	-1.5258	2.8604	3.1188	1.9511	-1.1365	0.8388	-1.2534	1.6147	1.9256
orf19.410	ARH1	1.9489	-1.5172	-0.4605	0.0639	2.1202	1.3826	0.279	-1.0597	-1.3665	0.0578	0.2946	1.2083	-1.5902	-1.8033	-1.1556	-0.9469	1.1225	1.61	0.8648	0.7253	0.0006	0.4459	0.7767	0.7518	-1.5028	-0.3471	0.2961	0.0195	-1.0594	-0.6613	0.3368	0.1247	0.841	0.0977	1.192	-0.522	0.9196	-2.421	0.1886	-1.6983	0.1306	-1.204	0.9451	-0.602	0.7277	0.7105	-1.2123	0.678
orf19.5074	UBA2	-0.9359	0.2046	-0.7864	-0.5658	0.0321	0.3403	1.5971	-2.3155	-1.6019	0.0008	0.0008	0.5685	-1.9391	-2.0288	-0.4095	-0.2503	0.1452	0.329	-0.4492	0.8564	1.7123	0.4678	0.7239	0.0576	0.8551	1.1018	-1.4583	0.5506	0.2722	0.1114	1.1952	-1.2611	-1.4774	3.4059	1.888	0.0307	0.942	ND	1.1216	0.416	0.4983	0.2912	1.1636	0.4719	1.378	0.7868	1.2137	0.5526
orf19.5793	RPT3	2.1025	0.2164	0.7117	1.1538	1.4241	0.0963	2.1386	0.2633	-2.9895	0.0007	0.0007	0.1994	0.1042	0.5597	1.0546	0.5395	0.6232	0.8193	0.2978	0.2783	0.9085	0.2671	1.4699	-1.4328	0.0722	0.5404	0.7722	-1.2088	0.8637	-1.7707	1.2402	0.5581	1.0218	2.0786	2.1816	-0.7388	-0.6251	-2.0187	0.8839	1.3643	-1.2464	-0.6056	0.1454	0.9156	-0.5687	0.767	-1.2592	0.2993
orf19.3347	RPB7	0.1399	0.1964	-1.0972	-1.2006	-1.4274	0.8921	0.3777	1.0587	0.0951	1.0028	0.7127	-0.9241	0.8821	0.2565	-0.8446	-1.6053	-0.9	-1.6109	0.526	0.2977	1.6505	1.6986	-0.48	0.0782	3.3234	3.6648	3.95	-1.4666	-1.4747	-0.8419	-1.7266	-1.4802	1.1219	0.2202	-0.5302	-1.8584	-2.1834	-1.6946	-1.3775	1.0848	3.8305	ND	1.1198	1.3318	1.71	2.6052	1.0184	0.4893
orf19.2893		-0.2816	-0.5737	0.3721	0.4753	0.1811	0.676	0.3455	2.0895	0.5577	2.0651	1.2813	1.1461	-0.355	1.6017	0.6542	0.5474	-0.6476	0.0229	-0.9979	0.5219	0.1306	-0.3598	-0.652	0.1234	0.253	-0.1778	-0.3366	0.7136	1.0944	0.6341	1.2919	0.3703	0.8207	1.5539	-1.0699	1.6272	-1.7053	-2.7742	-3.5528	-1.3258	0.0835	0.6884	-1.4634	1.1562	0.1717	0.6432	-0.2517	0.2128
orf19.7236	TIF35	0.9732	0.6523	0.8033	-1.3274	1.0248	-0.6063	0.0262	1.0371	0	0.0008	0.0008	0.0065	-1.6505	-1.7925	0.1791	1.0584	-1.4021	-1.3676	0.1655	0.2113	1.5912	0.7825	-0.2823	0.7168	0.144	1.107	0.3985	0.8073	1.3902	0.2164	1.1014	1.8378	1.3416	ND	0.5462	-3.1683	-2.5149	-1.4541	1.717	1.1504	1.3699	0.4407	0.655	-0.2776	3.2489	1.0183	1.0782	1.7541
orf19.1115	GUK1	0.6427	0.2013	0.6261	0.5846	-1.8114	0.1121	0.3842	0.4036	0.1244	0.6958	-0.3194	0.8271	0.8916	0.2838	-0.9321	0.5989	1.029	1.3183	-2.6966	0.5911	-0.4592	0.037	-1.3283	1.0499	0.8973	0.3876	0.2944	0.4259	0.4574	0.5961	-1.4248	0.3267	0.6374	1.0524	-0.6634	-0.4406	1.5573	1.066	0.5309	0.569	0.2799	0.4332	0.001	-0.1333	-2.251	-1.0593	0.5101	-1.2769
orf19.2298	WBP1	-0.4877	-1.853	-0.9094	-0.7947	0.3118	-0.7311	-1.1301	-1.5079	-1.168	-0.8643	-1.4852	0.2122	1.3781	0.7504	0.7431	0.3401	0.6385	-0.6348	-0.7632	0.4445	0.2126	0.1631	-0.1873	0.1997	-0.3448	0.3377	0.5567	0.5293	0.2525	0.0738	0.1046	0.9235	0.1212	1.3586	-0.3998	-0.9563	0.3328	0.1628	0.548	-0.7238	-0.6767	-1.1843	0.749	0.0585	-0.6908	-1.3119	0.0997	-1.2771
orf19.6696	TIM9	0.157	1.4902	1.6279	1.3652	-1.3936	1.5869	1.045	0.8726	1.2551	-0.9733	0.0633	2.1279	1.4146	0.4444	0.1113	0.3025	-1.7451	0.1775	-0.24	-0.6042	0.8128	0.6643	-1.4213	0.0844	2.0448	1.9736	1.6665	1.3346	1.3592	0.8402	0.0457	1.6041	1.8933	0.4987	0.1975	0.6326	0.8461	1.0844	1.6976	0.3247	0.4048	0.634	1.0598	0.486	0.845	1.188	-0.1405	1.4816
orf19.5885	SNU13	-1.6914	-0.9918	0.0111	0.0175	0.7772	-0.591	-1.4947	-0.3863	0.1228	-0.7645	0.8206	0.1137	-0.5623	0.2957	-0.8183	-1.0138	2.1118	0.2152	0.3198	2.4825	0.4553	1.2033	0.1789	-2.0212	1.3632	-1.1073	0.758	-0.978	-1.0874	0.118	0.5526	0.1314	-0.8871	0.5625	0.5428	-1.5575	0.4012	0.042	1.3648	-1.3881	-1.2474	-0.0402	0.5589	-0.6745	0.6643	-1.1262	-0.8909	-0.4144
orf19.1390	PMI40	0.6334	-1.0834	-0.4354	-0.8003	-1.8194	0.0522	0.2654	0.6522	1.5279	0.8667	2.252	0.1681	0.4201	-0.8605	-0.8268	2.6671	-1.1759	2.2991	0.8293	1.178	0.2143	-1.4156	1.2653	1.0541	-0.9147	-1.3838	-1.2039	0.2626	0.345	-0.5224	-1.2599	-1.5168	-0.5865	1.0008	2.6804	0.1379	-1.1711	-0.7997	-0.6551	0.1937	-0.1902	0.3611	0.9099	2.6886	0.2132	1.2498	0.94	2.076
orf19.2917	NUG1	0.4127	0.1055	-1.0481	-1.1724	-2.6497	-0.4149	-1.1533	-1.0271	-0.8547	-0.3987	-0.4551	-1.0472	-0.0665	1.7539	-1.3195	-1.8261	0.9882	0.4104	0.9892	0.9127	-0.4095	-0.2724	-0.6906	-0.4864	-0.491	-1.8056	-1.2383	0.9952	0.5407	-0.376	0.8973	0.1933	0.1566	1.5787	-1.1928	0.2596	-1.6997	-1.6798	-1.3927	-2.081	-1.6978	-2.3629	-0.947	-0.6125	-0.7232	-2.8325	0.0541	0.3863
orf19.4025	PRE1	0.1601	1.8276	1.8583	1.6306	-0.8855	0.88	1.1839	0.9475	0.9271	1.0751	0.895	0.4957	-0.6822	0.3731	0.0304	0.8414	-0.6153	-0.7073	0.6607	0.5379	-0.5191	-1.2757	-0.4578	-0.9728	0.271	0.4214	0.0457	-0.2917	-0.1097	-0.9682	-1.4511	-0.7844	0.549	1.1023	0.17	-0.8183	0.153	0.6084	1.1777	0.4628	0.6964	0.7131	-0.51	0.9675	-0.8145	1.3417	0.9607	-0.9219
orf19.3054	RPN3	-1.6169	0.0183	1.0872	0.9488	1.3555	0.5324	-0.5983	-1.2919	-2.0096	0.3642	0.1799	-1.8851	-1.8011	1.3144	3.0517	2.2638	0.3929	0.4805	0.2188	0.013	-0.4056	-0.5788	0.8666	0.0043	-1.2617	-0.8059	-0.8759	0.3411	-1.1563	-2.3069	1.4739	0.2815	0.1365	1.2344	-0.8637	1.5035	0.2009	-0.4834	0.6045	0.1477	-1.1819	-1.2496	0.5662	1.3031	0.3859	-1.8252	-1.3309	ND
orf19.2183	ARB1	0.0051	-0.9354	-0.3625	0.4309	0.7248	-0.4654	0.1799	0.091	1.1999	-0.4644	0.212	0.4688	0.904	0.203	0.4004	0.3949	4.7651	3.6443	4.6556	4.5547	-0.8041	0.208	0.4445	0.3607	-1.1123	-1.8761	-0.6269	-0.8753	-0.8458	-0.616	-1.7767	0.4289	0.4653	0.7399	0.7467	-1.5831	-1.2292	0.5906	0.1381	1.1038	-0.1838	0.0407	0.1854	1.076	0.2867	0.7883	1.372	0.5273
orf19.3628	RSP5	ND	ND	ND	ND	ND	ND	ND	ND	ND	1.1073	1.8758	ND	ND	ND	-0.6275	-0.4435	0.2939	1.7043	1.4661	-2.1719	ND	ND	1.0367	0.7092	ND	ND	ND	ND	ND	ND	ND	ND	ND	ND	ND	ND	ND	ND	ND	ND	ND	ND	ND	ND	ND	ND	0.6785	0.7927
orf19.1837	SPT15	ND	ND	ND	ND	ND	ND	ND	ND	ND	-0.9554	-0.7447	ND	ND	ND	0.3688	-0.6186	0.3746	0.4654	-0.6263	-0.0992	ND	ND	0.8762	1.6161	ND	ND	ND	ND	ND	ND	ND	ND	ND	ND	ND	ND	ND	ND	ND	ND	ND	ND	ND	ND	ND	ND	-0.2817	-1.3372
orf19.2736	BUR6	-1.0964	-0.5889	0.2361	0.17	-1.5586	-1.029	-1.3365	0.1978	-0.6784	0.0442	-1.5496	0.6563	0.5935	0.4935	0.8548	0.7353	-0.1299	1.4977	-0.0664	0.0942	-1.1782	-0.7557	1.2449	-0.6887	0.1013	-0.6036	0.1569	0.9618	0.6934	0.6052	0.9845	0.3815	0.6929	-1.1979	0.4932	1.3264	1.1622	0.7574	1.133	0.0459	-0.3018	-0.0936	1.6263	0.8663	0.3398	-0.6054	-1.1825	0.72
orf19.3037	PAB1	0.6645	-0.706	-0.5562	-0.5478	0.9892	-1.4825	-1.5757	-0.5513	-0.8228	-0.7985	0.5887	-1.079	-1.5345	2.0515	0.9265	1.3941	-1.5326	1.1121	-0.1815	-1.2149	0.1246	0.8546	-0.9988	-0.6156	-3.0853	-2.951	-2.622	0.4477	-1.5551	-1.5258	1.0808	-0.7797	-0.436	1.0185	-0.6844	-2.8193	1.3267	2.0962	-1.3911	-0.3327	-1.364	-1.5297	-0.6471	-1.6886	-0.9056	-0.4192	-0.5435	-0.3351
orf19.4154	SPB4	ND	ND	ND	ND	ND	ND	ND	ND	ND	0.0007	0.0007	ND	ND	ND	1.4491	1.1049	-0.7793	0.6206	0.3962	-1.7427	ND	ND	0.7368	0.4541	ND	ND	ND	ND	ND	ND	ND	ND	ND	ND	ND	ND	ND	ND	ND	ND	ND	ND	ND	ND	ND	ND	-1.5943	-3.1278
orf19.2571	SEC4	-0.938	-0.9181	0.1308	0.2194	1.9975	3.1287	1.462	0.0748	-0.4514	3.859	2.0104	-0.9937	0.7874	-0.7695	1.688	0.6773	2.2545	1.2286	0.8198	2.3671	0.1079	-0.9048	3.7083	4.253	1.4894	-0.3722	1.1639	1.5069	1.1259	-1.2366	-1.8562	-1.4539	0.7964	0.757	3.2849	ND	0.4504	0.3071	-0.3784	0.5056	0.4036	0.0756	-0.7201	1.7776	1.5115	0.0714	-0.7148	-0.6302
orf19.837	GNA1	-1.2925	-1.5559	-2.2481	-1.2113	1.8139	-1.1047	-0.8804	-1.3186	-1.5325	0.5522	0.1344	0.2575	-1.1315	-0.4849	0.9351	-0.8235	1.0009	-0.741	-1.5039	0.5636	-1.2148	-1.1982	0.7986	0.1642	-2.1358	-1.1718	-0.9314	0.0068	-1.2653	-0.931	0.9035	-0.9744	-1.3051	0.1067	0.7328	-0.8458	0.1134	-1.3366	0.1598	-1.9424	-1.8224	-1.8843	-3.0511	0.9098	1.7491	0.8977	0.3407	-1.1544
orf19.2960	FRS2	-0.5369	-0.4181	-0.5585	0.3823	1.0939	-0.1488	0.6609	0.0843	-1.1776	1.4093	1.0361	-0.9865	-0.7321	0.1743	2.2982	3.8775	2.1378	0.8332	1.6931	2.5502	1.5852	2.2217	1.1827	1.8163	2.3245	1.8504	1.3701	-1.0687	0.2137	-0.5087	1.1939	-1.0014	-1.3692	0.2678	-0.7666	1.1742	-0.849	0.5041	0.6656	0.2083	-0.8056	0.3348	0.1852	2.1188	0.4283	1.1806	-0.316	1.8697
orf19.3052	YPT1	-0.3064	-1.1736	-1.4615	-1.1899	0.8154	-0.4629	0.0992	-0.5299	-0.5555	3.2973	4.2865	-1.1414	-1.1816	0.2948	0.828	0.5442	-1.9939	0.5724	0.4427	0.0793	0.3704	0.5352	0.9758	-0.5319	-1.1958	-1.5838	-1.1666	-0.515	0.0384	0.2143	-0.5216	-0.2015	-0.4401	0.3662	0.8736	0.4653	0.4749	1.1083	0.0394	1.0375	1.3814	1.3073	0.2428	-0.353	-1.4595	-0.7308	0.8504	0.8989
orf19.2641		ND	ND	ND	ND	ND	ND	ND	ND	ND	0.3476	0.1347	ND	ND	ND	0.0027	2.0746	0.0717	0.834	-0.9894	2.0345	ND	ND	0.3682	0.7062	ND	ND	ND	ND	ND	ND	ND	ND	ND	ND	ND	ND	ND	ND	ND	ND	ND	ND	ND	ND	ND	ND	0.7414	1.7395
orf19.2937	SEC53	0.5852	-0.9312	0.2723	0.7555	0.1167	-1.2238	-1.3645	0.8105	-1.2665	0.2912	-0.7331	-0.7323	-1.4227	0.3596	0.4251	0.0576	-0.7473	1.108	1.4704	-0.1439	0.1221	0.3662	-1.1867	-2.2445	-1.2882	-1.3856	-1.1766	-0.3964	-1.0622	0.3459	-1.1703	-0.9591	-0.9182	-1.2171	0.5636	-0.5627	1.7326	0.6221	-0.4968	0.9053	0.0283	1.1871	-1.0366	-0.913	-0.5974	-0.9308	-0.6175	0.3644
orf19.7264	RPN11	0.2698	1.5092	1.1777	0.608	-0.5563	2.9914	1.0989	1.2307	1.2538	-0.1539	-1.2736	0.9634	0.5301	0.471	0.9281	1.6754	-0.2379	-0.6784	0.8386	0.6664	0.0253	0.1046	0.6001	-1.6376	0.237	1.0198	0.2124	0.1286	1.4832	0.2805	0.1649	1.971	0.5652	1.6517	2.9323	0.8324	1.9496	0.8786	0.65	-1.4614	0.4111	-0.088	0.8726	0.3091	0.2134	1.0995	-0.469	-0.6283
orf19.7234	RSC8	ND	ND	ND	ND	ND	ND	ND	ND	ND	0.8129	0.321	ND	ND	ND	0.7669	2.8805	0.3668	0.3277	1.1175	0.1787	ND	ND	-1.4004	1.1852	ND	ND	ND	ND	ND	ND	ND	ND	ND	ND	ND	ND	ND	ND	ND	ND	ND	ND	ND	ND	ND	ND	0.406	2.3599
orf19.4230	PRE4	ND	ND	ND	ND	ND	ND	ND	ND	ND	1.2023	0.423	ND	ND	ND	-1.4623	0.6491	2.137	2.2147	2.9296	0.0054	ND	ND	-1.372	-0.4203	ND	ND	ND	ND	ND	ND	ND	ND	ND	ND	ND	ND	ND	ND	ND	ND	ND	ND	ND	ND	ND	ND	0.6447	-0.4858
orf19.4236	RET2	0.5575	0.0483	0.009	0.1908	0.911	0.3777	0.1771	1.2388	0.175	1.0676	0.9989	0.9802	0.8382	0.964	1.9312	1.0725	0.3774	0.8237	-0.5574	0.625	1.1021	1.6221	0.9808	1.0938	1.0355	0.1953	0.755	1.5203	1.7735	1.6835	1.1875	0.8572	1.2308	1.4219	0.2792	1.3045	-0.6773	-0.4553	-0.3858	0.3878	0.6747	0.3919	-0.5456	-1.5652	1.1037	-0.7331	-1.2167	0.179
orf19.213	RPN12	0.066	0.3152	2.0094	1.8335	1.75	1.2907	0.9175	1.2078	0.2977	0.9848	0.6512	-1.4483	-1.0602	1.6127	0.6696	1.8886	0.3232	0.9965	-0.4866	0.6667	0.5164	-1.1004	1.2519	2.0576	0.234	-0.401	-0.8958	-2.0578	-1.4656	-1.3368	-0.4566	-1.4821	-0.5614	0.2072	1.319	2.0962	0.2501	0.1377	0.7851	0.6196	0.4995	0.0126	0.6477	0.7771	-0.3468	-0.1981	-0.2845	-1.8388
orf19.1283	MEC1	0.1437	0.6934	0.8052	0.8009	0.4426	1.173	2.2501	1.5439	-1.1523	2.579	1.557	1.1647	2.4279	0.8427	0.5336	0.0581	1.4023	0.6958	0.655	0.6603	-0.6396	0.0856	0.783	0.6461	1.8443	1.8621	1.0498	0.4478	1.8099	0.1609	1.9536	0.5989	2.4964	1.316	1.083	0.3732	1.2931	0.1873	-2.5624	0.1171	0.3716	0.5795	0.4808	1.0721	-1.3734	0.9739	-0.2137	0.1586
orf19.7292	ARP2	0.7779	-0.4534	0.811	0.6763	1.3382	0.1515	-1.2199	-1.3456	-1.724	-0.3748	0.0724	0.9622	-0.6816	2.2402	-1.7089	-1.2072	1.1009	1.5008	1.2617	2.0695	1.2546	0.3929	0.7951	-0.771	-0.684	0.1783	-0.7705	-1.4706	-1.377	-2.6779	0.9537	1.6506	0.7589	-1.1731	0.9131	-1.1891	0.108	0.1903	0.5297	2.0659	1.733	2.0157	-0.5872	-0.6259	-0.3526	-1.2233	5.0152	9.9495
orf19.4032	RPN5	-0.2304	2.2722	1.8628	1.7745	-0.2127	2.0168	1.4902	0.9571	1.0154	0.264	0.6672	1.5466	0.7306	0.0966	0.8575	1.1092	0.2015	0.2771	-0.299	0.2706	0.1047	-0.6029	0.775	-0.9586	0.5111	-0.9659	-0.575	0.7185	0.0405	-0.8352	-0.5088	-0.7726	0.7643	0.1497	0.4378	0.1718	1.5448	1.2952	0.6728	0.6233	-0.4233	0.0146	-1.0942	-0.0775	1.1711	1.131	-1.3415	-2.4882
orf19.5959	NOP14	-0.1414	1.0727	0.1433	-0.2921	1.0102	0.7291	0.803	-1.3543	0.1243	0.0174	-0.3139	-0.4997	-0.8557	0.386	0.4666	0.6396	1.9332	0.6737	-0.5976	1.7324	0.226	0.0319	0.7117	0.2298	0.7717	0.4744	0.3168	-2.2552	-1.5435	-0.8546	1.5244	0.8683	0.2249	-0.307	0.9688	-1.1336	-1.4335	-1.703	-0.8632	-0.906	0.0336	-2.5546	0.0102	1.1827	1.7421	ND	-0.8118	-0.446
orf19.6745	TPI1	-0.5911	0.3739	0.1771	0.6141	0.1776	1.5503	1.1584	0.5372	1.2581	0.9319	0.4999	0.6586	0.4897	-0.816	0.7515	0.1691	-0.5992	-1.1109	-1.265	-1.1064	-1.0081	-1.3214	0.2369	1.0557	0.5727	1.1778	0.4326	0.8994	1.0675	0.6505	-0.9185	-0.9641	0.7661	1.5754	0.3287	-0.4784	-1.1062	-0.9154	-0.7665	-0.138	0.3366	0.3387	-1.187	1.0611	0.299	1.7061	0.6774	-0.2871
orf19.5912	MAK21	-0.8775	-1.3961	-1.4845	-1.9037	0.2114	0.5595	-0.5782	0.8061	0.412	-0.5713	0.1767	0.8988	0.3313	1.1832	-0.5259	-0.0865	0.644	-0.4564	-1.3532	0.8162	0.0111	0.1221	0.6066	0.4251	-1.2252	-0.4451	0.3094	-2.0178	-2.2904	-1.6002	2.0138	0.9089	0.4257	0.9253	-0.5948	0.362	-1.0881	-0.6	-0.7005	-0.5279	-1.1589	-0.8159	0.9175	0.5104	0.2953	0.3776	-1.1636	0.78
orf19.5027	LCB2	0.0245	0.096	-1.609	-1.8794	0.174	-0.708	-0.2762	0.9349	0.2249	-0.3516	-0.3654	-0.9041	-0.7062	1.2474	0.7812	0.1533	0.4968	0.0308	-0.4838	-0.6051	2.2742	1.3557	-0.2085	0.5461	-0.4994	-0.9549	-2.0845	0.8419	2.0501	1.2563	0.3495	1.308	1.2154	0.3074	-0.7397	-0.3479	0.0054	0.0819	-0.5458	-0.4685	-0.8262	-2.5485	1.3743	0.5262	0.1467	1.1827	0.0245	-1.2988
orf19.407	GCD6	0.2374	-0.3457	0.656	-0.062	1.041	-1.3191	-1.4977	-1.4212	-1.3416	-0.7516	-0.8899	-1.8368	-1.0488	-0.9173	0.0756	-0.7223	0.878	-0.6455	0.6216	-0.1528	1.5219	0.4438	0.1859	-0.7574	-1.2687	-0.9519	0.2436	-2.1677	-1.5544	-1.5185	0.6783	1.7407	0.8318	-1.2684	0.5846	-0.6743	0.8186	1.5802	0.5661	0.7008	-1.0874	0.4139	0.5861	-1.9024	-0.4558	0.9797	-1.2406	-0.6804
orf19.4427	SKP1	ND	ND	ND	ND	ND	ND	ND	ND	ND	0.6696	-1.1906	ND	ND	ND	0.8122	-0.513	0.3314	0.0834	-0.935	-0.941	ND	ND	0.5244	-0.5553	ND	ND	ND	ND	ND	ND	ND	ND	ND	ND	ND	ND	ND	ND	ND	ND	ND	ND	ND	ND	ND	ND	-0.7322	-1.0449
orf19.4223	GCD11	ND	ND	ND	ND	ND	ND	ND	ND	ND	0.0007	0.0007	ND	ND	ND	0.6444	0.7899	0.1804	0.5659	0.2711	0.1273	ND	ND	0.0826	0.2639	ND	ND	ND	ND	ND	ND	ND	ND	ND	ND	ND	ND	ND	ND	ND	ND	ND	ND	ND	ND	ND	ND	0.0218	ND
orf19.7261	GDI1	0.868	0.9767	1.1635	0.6344	0.6845	2.0031	2.0925	1.5904	0.3512	1.8723	1.481	1.9151	1.5709	-1.205	0.5496	0.4565	0.7537	-0.4566	-0.9076	-0.6607	-0.9233	-0.9572	0.4748	0.8218	1.1978	0.646	0.7534	0.1206	-0.3544	0.7754	-0.0968	-0.3581	1.2087	0.405	0.5252	-0.8356	0.5266	0.9273	0.0208	0.7046	0.6264	1.2417	0.4593	0.0354	0.9682	0.8052	1.2391	0.2068
orf19.7119	RAD3	ND	ND	ND	ND	ND	ND	ND	ND	ND	0.0008	0.0008	ND	ND	ND	-0.472	-0.8029	-2.902	-0.7698	0.5584	-0.7806	ND	ND	-0.3451	-0.8554	ND	ND	ND	ND	ND	ND	ND	ND	ND	ND	ND	ND	ND	ND	ND	ND	ND	ND	ND	ND	ND	ND	1.828	0.0086
orf19.4367	SMC1	-1.366	-1.0785	-0.7409	-0.425	0.0743	-1.5891	-0.8728	-1.3207	-2.1547	-0.4996	-1.4513	0.475	-0.9996	1.1285	0.8048	-1.0059	0.1873	0.0837	-0.6605	1.4078	0.0702	-0.6992	-1.0591	-0.7677	0.1894	-0.718	0.443	0.1691	-1.0212	0.1666	-0.6086	-0.8801	-0.3277	0.151	0.1147	0.7783	0.5422	0.2784	-1.7192	-1.1864	-0.9656	-0.1859	0.4725	0.5424	-1.0724	-1.9371	-1.0964	-2.0098
orf19.2909	ERG26	-0.319	-0.3882	-1.7484	-2.2152	-1.2113	-0.6182	-0.5851	-0.4602	-0.5526	0.2445	0.2234	0.122	-0.9478	0.3612	-1.5903	-2.1997	2.1038	1.5724	0.8934	1.5343	0.6503	0.1165	-0.5601	0.1266	-0.7045	-1.2353	-2.4044	1.5026	1.2286	0.8359	-0.4641	0.4175	0.3307	-1.0569	-0.9872	-0.8194	-1.5409	-1.2107	-0.8646	0.4405	-0.3903	-2.5849	1.5042	0.5868	0.2326	0.8132	0.5136	-1.2717
orf19.5383	PMA1	-0.9746	0.3629	-0.3782	-1.0076	-1.1892	0.3698	0.1458	0.0727	0.551	0.7243	1.1859	1.8458	0.4457	0.1197	1.8896	3.1638	0.6263	0.7233	0.869	1.1852	2.2758	2.0977	3.948	1.834	0.6838	0.2693	-0.9284	1.0574	1.0415	1.8146	0.5251	0.0854	0.1254	ND	1.6556	-0.3752	ND	0.6686	1.0037	0.169	1.1096	-1.3256	-1.4438	0.931	1.2794	1.3163	0.0642	0.2031
orf19.5378	SCL1	0.7177	2.7969	2.4065	1.8943	0.3387	2.3134	1.0787	1.2166	0.7661	0.2702	0.3698	-0.6558	-0.3769	0.1803	1.0227	0.4634	-0.9924	-0.283	0.7141	-0.8008	0.259	-0.7477	-0.9142	0.1922	0.8183	0.0564	0.0077	-0.5146	-0.1525	-0.6534	-0.8155	0.5194	0.6167	1.3527	0.7628	0.0586	0.9265	0.8415	0.7218	0.5771	1.6257	0.7307	-0.3682	-0.2562	0.0732	0.6791	0.1272	-0.6287
orf19.1478	STT3	-0.531	0.2449	1.064	0.5289	-1.6685	0.0703	0.6067	-1.2001	-1.5573	0.0008	0.0008	1.0367	-0.3864	0.7509	0.42	0.3848	-1.1844	0.2716	0.1028	-2.4994	0.2601	0.2203	0.6661	-1.3533	1.3093	1.43	3.0984	-0.7257	-0.2811	1.3029	-1.9978	0.7289	0.6105	0.5821	1.2215	0.8233	1.2169	0.7771	-0.7098	-0.7037	-1.3989	-1.3239	-0.514	0.144	-1.2237	0.3711	0.7243	-2.1551
orf19.4538	RNA15	0.4606	0.25	1.2237	0.1777	-1.647	0.1573	0.2604	0.3286	-1.4108	0.2741	-1.1117	0.2129	0.318	2.2064	0.1678	0.5687	0.4927	0.2085	1.0069	-0.2268	-0.5162	0.5118	-1.3612	-1.3716	0.413	0.5581	1.0418	0.1853	0.854	-0.546	0.0745	0.8847	0.0958	1.7813	0.253	0.6447	0.9206	0.6984	0.8769	-0.7785	-0.1727	-0.3343	-0.3334	-1.1638	0.3335	0.6064	-1.5149	-0.6425
orf19.3593	RPT6	ND	ND	ND	ND	ND	ND	ND	ND	ND	0.0007	0.1803	ND	ND	ND	2.1424	0.3288	-0.5721	-0.2316	1.5021	0.0587	ND	ND	0.2947	0.0525	ND	ND	ND	ND	ND	ND	ND	ND	ND	ND	ND	ND	ND	ND	ND	ND	ND	ND	ND	ND	ND	ND	-0.491	-2.1781
orf19.2275	MNP1	0.2216	-0.6581	-2.6877	-2.5099	-0.6354	-1.0621	-0.9554	-1.2405	-0.2386	0.0541	-0.5077	1.0265	0.0398	0.6323	1.0108	0.5731	1.462	0.1754	-0.6639	-1.2112	-1.3429	-0.9893	0.0041	0.4873	-0.736	-0.2785	0.5877	-1.409	-1.3352	-1.3815	0.5556	0.4773	0.1817	0.699	-0.5495	1.0312	-1.0888	0.2431	-2.3232	0.1491	-1.6973	-0.9556	-0.5353	1.1015	1.2637	-1.5603	-1.1412	-0.8802
orf19.5184	SRM1	1.4711	0.9031	1.5133	0.8765	0.4684	1.2229	0.1301	0.7829	1.575	0.2221	0.3198	1.1156	1.6359	1.5474	-0.2828	-0.2977	-1.6525	-0.9466	-1.2021	-2.1928	-1.0114	-0.6204	-0.5846	-1.9421	1.2173	-0.4961	1.2054	-1.3305	0.545	-0.5983	-2.4379	-1.3645	-0.678	0.1079	-0.1817	0.0067	-0.9556	-0.4688	1.2524	-1.0498	-1.0425	0.7111	-2.2514	1.0143	ND	-2.3771	0.6257	1.0208
orf19.7454	TAF6	0.0312	2.9317	2.5911	1.3891	0.1541	2.2867	0.993	0.5386	1.1744	1.4083	0.8626	1.7542	1.7003	-1.3639	0.2216	0.8398	4.6415	3.6797	5.056	5.1752	2.2993	1.5688	0.1979	0.5149	2.1027	1.9097	2.5304	-0.3465	0.2079	-1.7164	1.2539	0.5582	1.6266	-0.9447	1.315	0.8779	0.6484	-1.8166	-1.6719	0.1499	1.4738	0.0381	1.0142	1.2712	1.054	0.944	1.6944	0.6429
orf19.1687	PRP43	0.2612	0.0001	-0.6653	-0.3953	0.3831	0.3843	1.2589	-0.9718	0.468	0.6481	1.849	0.6093	1.0295	-1.1602	-1.3647	0.3222	1.8473	1.5945	1.1784	-1.4823	-0.7302	-1.2959	-0.7667	0.2098	0.5852	-0.5295	0.0874	0.3148	0.0867	0.9368	0.0636	-0.968	0.7991	1.2066	0.4388	0.2813	-0.7963	-1.5041	-0.5917	-0.3448	-0.7406	0.07	-2.5485	1.7417	0.8233	0.8355	1.6749	2.4188
orf19.1261	CEG1	-0.262	2.4318	1.4642	2.037	-0.2728	2.0655	0.1572	0.3311	0.6015	1.5726	0.9578	1.8249	1.3549	1.0387	0.9167	0.0311	1.9647	1.4836	2.1619	1.711	0.7156	0.8831	-0.5451	-0.3534	2.4861	2.9274	1.8897	0.1656	0.1909	0.6013	-0.3853	1.142	1.1383	1.1667	1.0424	0.6098	-0.2571	-1.5421	0.2357	-1.2394	0.5621	1.1536	2.5223	1.8063	-1.5386	0.203	0.7055	-0.5899
orf19.2863.1	ERV1	0.319	-0.8519	-0.5426	0.0101	0.7984	0.2111	0.4998	-1.5556	-2.1416	0.4097	0.497	-0.7794	0.2389	0.1871	0.2213	0.4768	0.2735	0.7657	0.6642	-0.9343	-1.1928	0.0598	0.919	0.1582	-1.0458	0.0307	0.796	0.6048	0.4706	-0.8463	1.1755	1.0378	0.8933	0.5166	-2.5522	1.4568	0.5213	-1.0122	0.2573	0.3292	-0.5709	0.293	0.1274	0.6562	-0.8737	-0.6475	-0.1391	0.6724
orf19.4631		1.1348	0.1869	-0.6679	2.5292	0.9539	0.2088	-6.0698	0.8873	0.8008	0.0007	0.0007	-1.8531	1.2846	1.2757	0.1092	-0.857	0.7597	0.2478	0.7909	1.9335	1.0443	0.7618	-1.1798	0.0245	1.1483	1.0936	1.4732	3.0314	3.0928	1.4272	ND	0.6859	0.7735	ND	-0.819	0.5106	2.0843	-1.0348	0.3984	0.6348	1.9012	1.3388	2.6463	1.0279	-0.6031	ND	0.4083	0.0966
orf19.1295	VAS1	-1.4578	-1.2762	-0.9964	-0.7241	0.3614	-0.4961	-0.2865	-0.4638	-0.8403	0.2353	0.6544	0.098	-0.143	-0.39	-0.8078	-0.4859	0.1271	1.5968	-0.703	0.7743	-0.9142	-1.1722	0.9766	0.0627	-0.7492	-1.2147	0.5145	-0.8145	-0.9598	-1.3172	1.4861	-0.9894	-0.6468	0.6415	0.17	-0.8521	-2.0328	-0.831	-1.3357	-0.805	-0.4347	-0.3346	-1.4345	0.2849	1.1628	-1.3757	-1.4122	-0.42
orf19.4093	NOP7	-0.3707	-0.2472	-0.2409	-0.2583	-0.8354	0.1872	-0.1418	-1.1705	-0.6793	-0.6691	-0.6562	0.3275	-0.275	0.4421	0.1934	-0.6555	-1.5416	-1.4728	-0.8808	-1.0456	-0.6982	-0.919	-1.3476	-1.1998	0.5298	0.4845	0.9331	-0.8527	-1.0228	-0.8614	0.0674	0.3391	-1.1635	1.2355	0.4109	0.8897	-1.2225	-1.5044	-1.3734	-0.4792	-1.2284	-1.2282	-1.2508	-0.174	0.5614	-0.6365	0.5869	0.313
orf19.7136	SPT6	0.3994	0.8183	0.2584	0.2604	-0.7462	-0.3441	-0.4813	0.4142	-0.716	0.6235	0.3885	0.777	-0.1105	-1.0073	-2.5715	-3.482	0.2696	-0.9411	-0.8048	-1.2577	-1.0889	-1.1809	-1.2383	-1.8537	-0.4127	0.222	-0.8621	0.5488	-0.3399	0.0705	0.3905	0.5617	0.7671	-0.2266	0.0122	-0.9408	-0.4525	-0.8211	-0.6424	1.1407	0.7129	-0.2253	0.0211	0.6081	1.3812	0.3745	0.2664	0.1457
orf19.2694	TYS1	0.2385	0.1721	0.3672	1.2547	1.5804	-0.871	-0.4458	-1.3547	1.2306	-0.8121	0.3979	0.7298	1.035	1.5669	-0.479	0.0807	0.873	-0.2526	0.6617	-0.2732	-0.8923	0.6601	-0.749	-1.8534	-0.9579	-1.018	-0.8721	-0.5325	0.2031	-0.7476	-0.8415	0.403	1.0684	0.719	0.4876	-1.3123	0.8656	1.0258	2.0838	1.8113	0.7364	-0.3981	0.0697	0.316	0.8178	-1.1683	0.3281	0.1347
orf19.3300	ZPR1	ND	ND	ND	ND	ND	ND	ND	ND	ND	0.2524	0.1401	ND	ND	ND	0.0555	0.287	-0.5766	0.0321	0.481	1.0599	ND	ND	0.8035	0.0652	ND	ND	ND	ND	ND	ND	ND	ND	ND	ND	ND	ND	ND	ND	ND	ND	ND	ND	ND	ND	ND	ND	-0.6108	0.5915
orf19.7483	CRM1	-0.3354	1.437	2.2451	2.5904	-1.8262	1.27	0.5795	1.9006	1.7751	-0.7172	-0.6147	0.928	0.7852	-0.7538	0.0779	0.8224	-2.4178	-2.4002	-2.236	-2.4628	1.1277	1.4589	-0.9129	0.0807	0.6831	1.1581	0.3296	1.6316	1.8466	1.6037	-1.1712	-0.1292	2.3855	0.5538	0.5512	-0.8604	-0.6408	0.7489	0.9175	-0.5725	-0.5071	-0.7363	0.4556	0.9345	-0.6421	1.0379	0.9217	-0.8067
orf19.6649	BRF1	ND	ND	ND	ND	ND	ND	ND	ND	ND	0.0008	0.0008	ND	ND	ND	0.569	-0.416	0.9649	0.9012	0.9481	1.6843	ND	ND	0.563	0.8242	ND	ND	ND	ND	ND	ND	ND	ND	ND	ND	ND	ND	ND	ND	ND	ND	ND	ND	ND	ND	ND	ND	0.439	0.0905
orf19.709	PUP2	-1.476	0.0641	0.6255	0.5207	1.1346	0.0064	-0.2539	-0.4415	-1.4802	0.0008	0.0008	-1.3846	-1.1459	0.6815	0.5809	-0.2126	0.7813	0.1159	0.4934	0.4564	1.9594	1.3215	0.0846	-0.3258	-0.9106	-0.5524	-0.5523	-2.2383	-1.2715	-0.8609	0.5157	1.1456	0.0623	1.0848	0.1659	0.0048	-1.4506	-1.4824	-0.5522	-1.5369	-1.095	-0.6293	-0.6088	1.4625	2.7178	-1.2456	0.1503	-1.1317
orf19.6375	RPS20	-0.5625	-0.84	-0.6548	-0.3182	0.706	-0.8065	-0.6596	-1.1857	-1.0252	0.0008	0.0008	-0.6663	-0.3868	0.2544	-0.8238	-0.7655	0.1265	0.1124	-0.6735	0.92	-1.127	-1.2182	0.5337	0.0733	0.674	-0.1823	0.4412	-1.3296	-0.8376	0.4846	0.3985	1.0127	0.7808	-1.4445	0.1944	0.9793	-1.4446	-1.5805	-1.1455	-0.5419	-1.041	-0.2239	0.2007	-1.0389	0.3966	-1.3602	-1.2354	-1.0939
orf19.4577.3	MRS11	-2.7494	0.2556	1.0858	0.2552	0.9836	-0.7475	-0.683	0.1116	1.1544	0.0008	0.0008	0.3647	1.0402	0.6252	-0.2598	0.5432	0.6152	2.2607	1.16	0.7049	0.3766	0.3508	-1.107	0.5766	0.6193	0.2918	1.0811	0.684	-0.3389	-0.7199	0.6981	0.4176	0.4747	1.2894	1.3544	1.1296	-2.4434	-2.9706	ND	ND	0.6623	0.4421	0.8923	1.1726	0.6346	-1.4452	0.3445	-0.1317
orf19.6702	DED81	1.0256	1.2928	1.9953	2.0814	-1.1406	1.5248	0.917	2.1056	0.7813	0.6238	0.7328	1.4336	0.8225	1.133	0.4194	0.226	-0.9996	0.4745	-1.8476	-0.6028	1.2397	1.6577	0.2632	-0.3164	1.7101	2.2167	1.9244	1.1661	0.7629	0.6493	-2.0373	1.1114	0.5589	0.0447	1.404	0.0682	0.2466	0.4889	0.0851	0.6724	-0.2124	0.359	-1.2255	1.3219	-1.2702	1.861	1.1372	-0.3267
orf19.6701	YHR020W	0.8182	2.0736	2.0955	0.9788	-0.4467	0.867	1.128	1.7138	1.2272	0.0008	0.0008	0.4286	1.498	0.4957	-0.9429	0.0208	0.2582	-0.8305	0.0523	0.1878	1.3151	0.7581	-0.4459	-0.092	2.0371	1.8189	1.9964	1.4976	1.6688	1.5156	0.4058	0.8138	1.7871	1.2982	2.1388	0.7484	-1.6086	-1.5503	-1.6663	-1.7675	0.6581	0.8487	0.3945	1.9558	1.2593	1.242	1.8032	0.598
orf19.1029	RPP1	0.5633	-1.6596	0.4033	0.5367	0.1185	0.4424	-0.3546	-1.2027	0.1532	0.0007	0.0007	-0.6838	0.7937	0.6272	-1.0165	-0.5504	0.7282	1.6205	0.3393	0.0922	0.0332	0.3174	0.161	-0.4911	-0.1708	-1.3396	-0.3725	0.6555	0.3624	0.4005	0.8288	0.4221	0.3266	0.6398	0.0902	-0.9707	0.217	-0.4349	-0.6504	-1.396	0.1391	0.8462	1.974	-0.7014	-0.6711	0.0773	-0.8668	-1.1119
orf19.1626	DYS1	0.1988	0.0806	-1.1232	-2.6416	-0.4784	-0.2193	-0.8364	0.2356	-0.7983	-0.4228	0.2301	0.8299	0.0872	1.8333	-1.5617	-1.2441	0.4688	-0.5328	0.2221	-2.2384	0.5967	0.2111	-0.8113	-0.3867	0.4454	0.6575	-1.7734	1.1439	1.0626	-0.3499	1.3922	0.7003	0.1161	-0.5769	-1.1766	-0.725	-1.0895	-1.4606	-1.7506	-0.8205	-1.2437	-3.1631	2.3812	1.0445	-0.8768	0.6754	-0.9044	-0.4952
orf19.1304	RRP4	0.2305	0.1185	-0.1912	0.654	0.8583	-1.2673	-0.644	-0.4342	-0.9538	0.0008	0.0008	0.3352	-0.2946	0.6652	0.1831	0.3033	0.4633	-0.309	0.2105	-0.434	-1.1817	0.5463	-0.9381	-1.6239	-0.7144	0.263	0.3268	1.6447	1.4277	-1.3769	0.44	0.7299	-0.6333	0.3801	0.0491	-0.5792	-1.4209	-0.948	-2.0483	0.1108	-1.0902	-0.7137	-0.3703	-0.7546	-0.0669	-1.0241	0.1122	-1.1949
orf19.1570	ERG7	-1.0997	-1.1368	-0.5443	-0.2912	-1.9115	0.2222	-2.1354	-2.3443	-1.1282	-0.2988	0.1129	-0.7418	-1.1236	-0.1362	0.9148	0.9759	0.9037	0.755	-0.6594	0.1684	-1.3829	-0.6544	0.113	0.3662	0.1019	0.3416	-0.252	-2.5535	-1.7422	-3.1877	1.2896	-0.6289	-1.3021	2.8239	0.9231	0.7457	0.8332	0.4795	-1.1698	1.1492	0.6354	0.4697	-2.3332	2.0728	-0.7483	0.2332	0.1716	0.7469
orf19.596.1	NOP10	ND	ND	ND	ND	ND	ND	ND	ND	ND	0.0007	0.0007	ND	ND	ND	0.0802	-0.6791	-0.3264	-0.6798	-0.615	-1.6791	ND	ND	0.3379	-1.2017	ND	ND	ND	ND	ND	ND	ND	ND	ND	ND	ND	ND	ND	ND	ND	ND	ND	ND	ND	ND	ND	ND	-0.7083	-0.7916
orf19.878	YNG2	-0.8654	-0.7235	-2.162	-1.8641	0.611	0.1544	0.0419	-0.3849	0.1884	-0.5777	1.2247	-0.5778	-0.6178	0.7262	0.8125	0.0127	0.8577	0.2826	-0.383	-1.2096	-0.484	-1.0714	0.8606	-0.2332	0.6094	0.0503	0.6246	0.4321	-0.9179	-1.4103	1.2517	0.8074	-0.1577	0.7752	-1.4077	-1.1594	-0.6577	-0.9097	0.011	0.3498	0.3226	0.5042	-1.5768	-0.2995	0.59	0.276	-0.2683	-0.4235
orf19.6455	YHR122W	0.0501	0.3671	0.3927	0.3278	-0.9867	0.571	0.1117	0.4971	0.3149	2.2306	1.1298	1.8815	0.7674	0.3819	0.6471	0.3372	1.175	0.9376	1.636	1.1826	-1.0598	-0.975	0.3317	-0.643	-0.5253	-1.044	-0.6692	-1.593	0.2858	-0.3684	0.3276	0.3134	0.4202	2.0084	1.423	-1.2705	0.4396	0.5997	0.2056	1.047	0.0116	0.7785	-1.02	-0.4978	1.3589	-0.1621	-0.4957	1.3211
orf19.7255	RPC10	0.4284	0.5893	-1.9303	-2.3238	-1.9317	0.6598	-0.6727	0.1505	0.6965	0.4839	0.358	1.2958	0.52	-2.0658	-1.2335	0.0291	2.505	-0.7399	-0.7227	0.0796	-0.2601	0.0955	0.7609	0.1452	-0.7457	1.1568	0.2166	1.0256	0.1639	-1.2691	-1.3777	-0.9062	-1.6447	0.4755	-0.829	-3.0168	-1.4359	-1.57	-1.5771	-1.1051	-1.6222	-1.6682	0.7193	1.1956	-0.8019	1.6315	0.1269	-0.5438
orf19.7488	IMP3	0.3943	0.0251	0.6475	0.4009	0.3231	1.4501	0.8768	0.3425	0.8093	0.8101	1.1199	0.8921	0.461	-1.9711	0.2013	0.8536	0.7983	1.2852	1.3724	2.0487	-1.1358	-1.2104	0.2775	-0.9941	0.4849	0.3241	-0.6249	0.1796	0.3879	-0.6144	0.5101	-1.8213	0.7435	1.5108	-0.3573	-0.788	-1.905	-0.5154	-1.2829	-0.3948	0.7953	1.0992	1.087	2.1709	0.2525	2.277	1.6901	-0.2538
orf19.1192	DNA2	-1.2312	0.4932	0.0939	0.2087	-1.0543	1.2702	2.0831	-0.24	0.6543	0.6034	0.3277	1.6404	1.3727	-0.8048	-0.099	1.8248	2.1936	2.4256	1.0812	0.6302	1.8721	2.1473	0.36	-0.457	1.0867	0.5701	0.4773	-1.3017	-0.5902	0.1157	0.0284	-0.7422	0.4339	ND	2.0465	0.1936	-0.6126	-0.2854	-0.4205	-0.104	0.1742	-0.5466	0.8892	1.4461	1.4299	1.253	1.5478	0.4258
orf19.6437	CDC23	ND	ND	ND	ND	ND	ND	ND	ND	ND	-2.4491	-1.5299	ND	ND	ND	-0.3788	0.3315	-0.5447	0.7423	-1.6574	-1.5647	ND	ND	-0.7835	-0.74	ND	ND	ND	ND	ND	ND	ND	ND	ND	ND	ND	ND	ND	ND	ND	ND	ND	ND	ND	ND	ND	ND	-0.5613	0.4371
orf19.6652	DBP8	ND	ND	ND	ND	ND	ND	ND	ND	ND	1.0768	0.3219	ND	ND	ND	-0.6205	-0.5719	0.7906	0.5986	0.9516	-1.0906	ND	ND	0.7743	-0.7862	ND	ND	ND	ND	ND	ND	ND	ND	ND	ND	ND	ND	ND	ND	ND	ND	ND	ND	ND	ND	ND	ND	-1.1935	0.3952
orf19.1387	CFD1	-1.7224	-0.6645	0.3842	0.7122	0.8727	1.9139	1.0391	2.6899	0.4182	1.3678	1.9673	2.789	2.9004	-1.4335	-0.5774	0.3478	0.6792	0.7339	1.2368	0.4711	-0.5776	-0.9604	0.1358	0.9297	0.6267	0.9586	0.6565	0.171	0.2986	0.2376	0.149	1.1404	2.9646	-0.5197	0.4346	0.0251	-1.2447	-2.4514	0.5041	-1.6142	0.315	1.5814	1.8857	1.6481	1.3977	2.1641	0.7563	1.3919
orf19.1248	RPB3	-1.1116	0.1849	-1.4654	-2.1451	0.0697	0.7614	-0.5249	0.7083	-0.8614	0.0007	0.0007	0.69	-1.0755	0.2964	-0.3966	-2.0861	0.0822	-0.7758	-1.236	-0.6758	2.3765	1.7461	-0.7525	0.4427	0.1091	-0.5564	-1.5447	0.2661	1.5782	1.9316	-1.3189	0.7686	1.811	-0.5595	-0.6418	-1.7339	-1.076	-1.4887	-1.0541	0.3368	-0.6149	-2.7102	1.8165	0.457	1.2795	1.4673	0.6451	-2.2271
orf19.5260	RPN2	-1.2449	-0.4382	0.6817	1.2731	0.9274	0.6634	0.9629	0.4369	0.0965	0.6369	0.6627	-1.4488	-1.2967	2.5025	1.4223	0.9665	0.3099	0.0033	-1.3182	-0.3429	0.4935	0.0381	3.2435	0.7646	-1.9809	-1.801	-1.6387	0.9814	-1.8186	-2.4053	-0.8698	0.0071	-1.0953	0.8684	-0.7297	0.5964	1.3235	1.5839	-0.8886	0.7256	0.3169	-0.5354	-1.5518	-0.6543	-2.5393	0.1663	-1.3428	-1.5199
orf19.5685	THS1	-0.7028	0.2586	0.2469	0.4191	0.1258	0.3864	-0.5868	-0.5913	-0.3924	0.6134	0.8454	1.9208	1.2308	-0.2611	-1.5997	-0.2555	-2.0662	-1.4428	-2.0578	-3.2615	0.2298	-0.6537	-1.1625	-0.4772	0.0371	0.0029	-1.4326	-2.0605	-1.0318	-1.1578	-1.628	-1.3524	-0.592	0.1914	1.0921	-1.1762	-2.067	-1.2658	-1.0289	-1.1385	-1.3145	0.0348	-2.4602	-0.752	1.4805	-0.3467	0.3786	-1.1852
orf19.1402	CCT2	-0.1349	0.6121	0.6723	0.5981	-0.5809	0.176	-0.3723	0.2884	-0.0977	0.9005	0.5133	0.253	-0.2676	-0.6745	-1.748	-3.5087	0.5395	1.7209	0.1854	-1.4885	-0.7106	-0.9541	-1.147	-1.6397	0.3748	0.7186	0.0087	0.5938	-0.2468	-0.4764	0.7266	0.9777	0.8984	-0.5123	-0.7284	-0.5087	-0.801	-0.9043	-1.2942	1.5919	1.7746	0.9175	0.4502	0.5573	0.0744	0.1539	0.2679	1.0063
orf19.2857	SSL2	0.3166	-0.7986	0.4028	0.7609	1.0488	0.4618	0.4082	0.7744	-0.6468	0.7792	-1.0237	-1.342	0.9522	2.3291	-0.7936	0.1536	1.6223	-0.5464	0.5502	0.2715	-0.3391	0.1867	-0.8673	0.3701	-2.3881	-1.8849	0.9319	0.0405	0.204	0.3612	-0.5968	0.9026	1.3628	1.49	-2.0156	0.2036	1.4533	0.3181	0.5113	0.1368	1.055	0.7974	0.7936	-1.1595	0.6104	1.079	-0.5682	0.9316
orf19.4030	PRI1	-2.3993	0.3601	1.39	0.4722	0.0091	1.6056	3.6293	2.7741	1.0025	0.756	0.8622	1.6594	2.1173	-0.0692	-0.3646	1.508	-0.6861	-0.4398	0.67	0.8777	-0.4038	1.3423	-0.4144	0.2175	0.3406	0.0181	0.3199	0.6052	1.1013	0.9309	3.3189	2.2352	3.3921	-1.8021	3.0498	-1.1121	-0.7394	0.2296	1.3128	-1.081	1.2036	0.999	-1.1161	0.2706	2.7454	0.1919	0.2331	0.1964
orf19.3259	SEC11	-0.5432	0.569	0.7497	0.438	-1.6272	0.492	0.4822	0.3843	0.8351	-0.5014	0.2178	0.2696	0.2056	0.0415	0.2768	0.0871	0.2675	-1.2665	-1.2604	0.1556	0.6633	0.2246	-1.0004	-0.5906	0.5474	0.2404	-0.6844	-0.6387	0.373	-0.5536	-1.0852	-0.9123	0.5121	1.6791	1.5415	0.3165	-0.9728	0.3832	-0.4536	0.2443	-0.5479	-0.694	0.2394	1.1879	0.9972	0.7579	0.4643	-1.2446
orf19.4004	CCT3	-0.8289	1.1804	0.7406	0.2729	0.9793	0.3769	0.8709	-0.522	-0.1481	0.3942	0.4694	0.2328	0.2434	0.4424	-1.252	-1.3693	0.8066	0.4327	-0.3005	-1.332	0.8813	1.5097	-1.5824	-1.0689	0.9947	0.9224	0.8943	-1.6286	-1.3584	-1.7508	0.5433	-0.6502	0.4884	1.4543	1.3385	-0.2318	-2.0664	-1.2591	-1.8392	-0.6849	-0.6821	-0.2879	1.9738	1.8255	-0.5997	-0.3484	7.9536	0.4576
orf19.1335	MTR4	0.5629	2.8467	2.2729	1.2485	1.8857	1.3348	1.0348	-0.7867	0.8349	0.5294	0.0007	-1.4763	-0.5332	-1.0262	-0.1608	0.8526	0.0197	0.9235	0.0422	1.4432	1.0624	1.1445	0.3565	0.1559	0.7027	0.1724	0.297	0.0095	-0.7647	-2.9646	-2.7962	-2.2512	0.0193	2.8403	0.1211	0.9601	1.0496	-1.2426	1.1144	-0.612	0.5422	0.3577	0.1679	1.0071	0.9315	1.4858	1.3126	0.6706
orf19.57	PSF2	ND	ND	ND	ND	ND	ND	ND	ND	ND	0.2657	1.7207	ND	ND	ND	0.1247	0.5885	0.0305	-0.6673	0.3466	0.6501	ND	ND	0.2474	0.108	ND	ND	ND	ND	ND	ND	ND	ND	ND	ND	ND	ND	ND	ND	ND	ND	ND	ND	ND	ND	ND	ND	-1.0447	-0.1367
orf19.262	SMC3	-1.1379	0.0579	0.8565	0.399	2.9949	0.1077	0.7054	0.3223	0.8536	0.0007	0.0007	0.3103	0.1536	0.8965	0.7825	0.3083	0.4601	0.1213	0.0578	0.8572	1.6713	1.3447	0.0758	0.6993	-0.5437	-0.4732	1.6099	0.295	0.3122	0.4205	-0.9166	2.7995	0.4031	2.0485	2.2018	0.2096	-0.5225	-0.8759	-1.3966	0.3865	0.8693	0.24	0.6636	-0.8318	2.9637	-0.2744	-1.143	0.0592
orf19.5623	ARP4	ND	ND	ND	ND	ND	ND	ND	ND	ND	0.51	0.9422	ND	ND	ND	-0.2578	-0.4792	-0.6014	0.1744	-0.4546	-1.8256	ND	ND	-0.7672	1.1091	ND	ND	ND	ND	ND	ND	ND	ND	ND	ND	ND	ND	ND	ND	ND	ND	ND	ND	ND	ND	ND	ND	-0.419	-0.6926
orf19.5156	YJL097W	-1.4345	0.3544	0.6439	0.1465	0.0632	1.1148	1.0948	1.152	1.0837	1.3236	1.7273	0.7957	0.4745	1.0627	0.9769	0.7077	0.9786	0.4293	0.693	-0.4321	-1.6434	-1.5604	0.7463	0.5579	1.0053	0.9053	0.8242	0.4737	-0.598	-1.0898	-1.0794	0.2172	1.0105	0.8497	1.1108	0.3478	-1.3427	-1.2386	0.9787	-0.8205	0.4406	0.8072	0.996	1.7384	0.1176	0.8104	0.6702	-0.3176
orf19.7222	PAM16	-0.7897	0.4052	0.5238	0.475	-2.4432	1.3519	0.5697	-1.1623	1.126	-1.131	0.3061	1.3086	1.3876	0.5911	-1.6728	-0.4582	-1.0547	0.9003	-0.9007	0.0284	-0.891	0.0594	-1.5731	-0.7152	0.5605	1.3178	1.1096	0.5161	1.6279	0.6179	-0.9024	1.1467	1.2333	1.785	-1.1093	0.6004	-0.2464	-1.8745	0.1176	-0.6703	0.0102	0.1996	-1.8795	1.2069	0.4921	1.7737	0.5605	0.52
orf19.3206	CCT7	0.8816	0.173	-0.7434	-0.5121	0.0363	-1.2224	0.0083	0.7288	0.0397	0.9362	-0.9361	0.3863	-1.0984	-1.1196	-2.5024	-3.3307	2.6844	1.5434	0.0955	2.8681	-0.5838	-0.8897	-1.1378	-1.9032	-1.03	0.0304	-1.4095	2.0793	ND	0.1085	1.0328	0.8624	3.2265	0.5402	0.6776	-0.6858	-1.4553	-2.309	-1.1934	0.6396	0.9246	-0.9667	1.8621	1.8009	1.4164	-0.5186	2.1631	-0.6704
orf19.150	TIM17	0.8637	0.4285	-3.393	-0.9149	0.0685	-1.0668	-1.8011	-1.3336	-0.7901	0.3054	0.3748	0.5252	-0.8344	1.2667	-0.7257	-0.7799	1.4233	0.8734	2.286	0.1054	0.0032	-0.9326	0.901	0.3023	-1.1389	-0.7985	-1.9872	0.8651	0.0156	-0.7749	0.0869	0.6411	-1.9354	1.175	0.6409	-0.8736	-0.3117	0.7134	0.8753	0.3343	-1.1629	-0.4133	-1.4422	-0.6399	1.6965	0.5439	-0.3287	-0.7325
orf19.4491	ERG20	0.0257	-0.6304	-1.5378	-2.9508	-1.5573	-0.8424	-1.0639	0.0628	-1.0944	0.0624	0.0436	0.7298	-1.0128	0.8132	4.3562	2.8002	2.1483	1.6452	1.276	0.581	1.0527	0.4115	1.1302	1.8592	-0.8626	-1.1199	-1.3053	-1.3825	-1.0896	-2.0938	1.0784	1.0464	1.0112	0.3355	-1.3653	0.9735	-1.2597	-1.0786	-2.1642	-0.3662	-0.6375	-3.7915	1.3638	0.1569	ND	0.7349	0.4127	0.4174
orf19.5242	CDC6	0.0589	0.3831	-1.1592	-1.9815	-1.2869	-1.142	-0.7645	-0.9022	-0.7188	-1.2434	0.4653	0.2769	-1.4847	1.2437	0.2138	-1.0333	0.3109	-1.8985	-2.3889	-1.0497	0.544	1.151	-1.1123	-0.8806	-1.1094	-0.8875	-1.6898	1.2803	1.0151	1.557	-0.8775	1.7018	1.2757	-2.079	-0.3259	0.5821	0.1638	ND	0.1152	0.7177	1.2279	-2.2878	2.3348	0.1452	1.2845	0.6988	0.9139	-0.9977
orf19.3960	HYS2	-1.3895	0.5357	0.5819	1.4406	-0.8609	0.0679	0.586	0.2847	2.0727	-0.9799	0.4803	0.7255	1.9991	-1.4483	-1.6023	0.1112	-0.4612	-0.502	-1.4032	0.3392	0.5805	0.1957	-1.986	-0.1131	0.578	-0.7612	0.3976	-0.3141	-0.26	-0.4947	-0.3444	-1.0518	-1.9042	3.2834	-1.1857	-1.3285	-2.1053	-2.7182	-1.5983	-1.2573	-0.7253	0.1792	-1.1741	1.6702	0.0175	1.4296	0.9874	0.3894
orf19.4581	PMH1	0.5818	0.0641	0.6511	1.2039	0.6582	0.6955	1.0714	0.0894	1.0612	2.1175	1.223	0.3742	0.2692	1.3114	0.9357	0.5221	0.6724	0.0837	1.0755	0.565	-0.8669	-0.7077	1.9471	1.3188	0.1462	0.3522	0.2686	0.4368	-0.4214	-1.0531	-1.9621	-1.0134	0.3816	-2.6641	1.4535	0.0732	0.6158	-0.5388	0.0081	-0.4172	0.2695	1.064	0.5926	0.9498	-1.9008	0.4611	1.1203	1.5529
orf19.5196	ESS1	0.1131	-1.5924	0.0436	-0.7609	0.3499	-1.7175	-1.7708	-2.4229	-1.2555	-1.2433	-0.8923	-1.38	-0.1292	-0.6692	-1.2425	-0.7843	1.3396	0.8419	-0.6697	-0.4524	0.4145	-0.1063	-0.5532	-1.1223	-0.8738	-0.7437	0.2865	-1.4995	-1.23	-0.9223	1.5329	0.516	-0.718	-0.9918	-0.302	1.3424	-1.4173	-1.1863	-0.0863	-1.1808	-1.608	-1.0233	0.685	0.7902	1.7151	0.7155	-1.6158	-0.9384
orf19.1137	CDC8	-1.137	-1.6642	0.3899	0.1205	0.7504	-0.9312	-0.9217	1.0045	0.2894	-1.5762	-1.2355	1.5706	-0.8209	0.9695	0.5009	-0.6394	0.6115	0.593	-0.9922	0.5984	0.1864	0.1299	-1.523	-1.9973	-0.9403	-0.3016	0.3991	-1.1902	-0.3197	-0.6413	-0.6341	0.4337	0.098	1.4538	-1.5712	-0.812	-1.1441	-0.9728	0.1335	-0.3368	0.2626	0.2949	-1.2501	0.0437	-1.6014	-2.1089	1.6726	0.1931
orf19.1136	APS2	0.4855	-0.4801	0.4447	0.6169	1.1192	-0.5213	-0.9771	0.243	-1.0475	-1.1628	0.0553	0.9049	1.1177	2.0256	0.439	-0.7806	0.2571	0.7592	-0.8567	-0.6323	0.2964	0.6613	-1.46	-1.7878	0.7892	-0.4303	0.3449	-1.1833	-0.4214	0.4007	0.356	0.8179	0.1545	0.6085	-1.7565	-1.1682	0.3291	-1.4982	-0.9213	0.1656	-1.0264	0.5313	-2.0898	-0.9437	-1.0813	-1.538	-1.1967	-0.4673
orf19.2288	CCT5	-0.287	-0.3663	0.3437	0.3005	0.3009	0.0848	0.0527	-0.866	-1.158	0.2979	0.0946	0.1711	-1.0856	0.2063	-2.0996	-3.7259	0.2873	-0.5481	0.5202	0.8791	0.163	-1.1637	-0.7771	-1.2952	0.9687	0.8181	1.0453	-1.7638	-1.8058	-2.1751	-0.5716	-1.0005	-0.8117	0.1652	-0.747	-0.4917	-0.825	0.0774	-1.8978	-0.9108	-0.4119	-0.9712	1.7238	0.2	1.1213	-0.9134	3.006	0.8094
orf19.2289	ARP3	0.2752	-0.251	0.6131	0.3794	2.251	-0.8218	-0.8056	-1.4342	-1.6781	-0.8616	0.1581	0.5244	1.5327	1.1171	-2.109	-2.8897	-1.9988	-0.0153	-1.7682	1.0561	-1.8286	-1.2158	0.3622	0.2719	-0.7477	-0.9371	1.083	0.0633	-2.2159	ND	-0.4796	0.0916	1.135	0.9097	0.236	1.8046	1.1945	0.435	-0.9382	0.746	0.6993	1.4541	0.6084	-2.0787	-1.062	0.8834	6.9715	5.1684
orf19.6463	NPA3	-0.61	0.7	1.0835	0.3658	-2.5389	0.2148	-0.4549	1.4201	-0.9618	0.5941	-0.5737	0.419	2.2889	1.8044	0.192	-0.0565	0.5122	0.1474	0.8631	0.2017	0.1998	0.563	-0.6957	-1.1294	1.2629	2.3021	1.0413	-0.3541	0.9156	1.3112	-1.8713	0.5786	1.1137	1.4798	-1.8896	-0.9831	-0.7498	-1.4818	-0.8233	-0.7375	0.7602	0.1596	-0.7428	0.9993	-0.6764	-0.9505	0.8049	0.6046
orf19.4336	RPS5	-0.5188	-0.6151	-2.1573	-2.162	-0.718	-1.6069	-1.6384	0.0813	0.0342	0.9572	0.735	1.8013	1.1889	1.7231	-0.4656	-0.6202	2.0598	0.9192	1.4136	1.7271	-0.2824	0.769	0.2857	0.2666	-2.0792	-2.8177	-3.4365	1.5756	2.8703	3.3237	0.247	0.6298	0.7358	0.5663	0.9242	0.9457	-0.9721	-1.2686	-1.3284	-1.222	-0.8975	-0.4515	1.7755	0.6285	-0.4631	-0.6673	0.4764	0.2354
orf19.3250	PRP40	-1.4732	0.5124	1.1652	1.6879	-3.2487	0.2015	-1.7179	1.2614	0.6172	-0.4053	-0.4565	1.9953	2.7535	0.7155	-1.5128	-0.6237	-0.3298	3.3234	1.1165	1.6932	-0.3694	-0.5139	0.1142	-0.2849	-1.5653	-1.6335	-2.9012	2.0747	1.8	0.3196	-1.6052	1.8593	1.9899	1.4812	0.2556	-0.8578	-1.1229	0.9723	-0.8287	-1.3893	-0.9206	-0.2659	0.0516	-0.6433	1.1499	0.9055	0.971	1.0262
orf19.4817	RAM2	-0.6159	-1.1132	-0.6873	-0.2347	0.5057	-1.729	-1.2842	-1.4751	0.2962	-1.2418	-1.4906	-0.5597	-1.2553	-0.916	0.2977	-1.2549	0.3651	0.3833	-0.4506	-0.9102	-1.2148	-1.0702	0.733	-0.8711	-0.1113	-1.0961	0.8631	0.9622	-1.2023	0.1761	1.2666	-0.8465	-1.3607	-0.5869	0.508	-1.984	0.6439	1.3409	0.1835	-0.7098	-1.4092	-0.3325	-1.1581	-1.6847	-0.8316	-0.7748	-1.0386	0.3809
orf19.4851	TFA1	-1.708	-1.7089	-0.6118	-0.4923	1.2332	-0.6945	0.1286	-0.9493	0.7839	0.3975	0.8549	-1.8076	-0.4937	-1.0376	0.6418	1.8521	0.2016	1.5707	1.1525	1.1752	3.0438	1.9048	1.2399	0.7946	0.6176	0.1988	0.8403	-2.0063	0.1911	-2.0924	1.563	0.778	-0.5966	0.2856	0.2485	-1.4572	-3.0838	-0.9907	-2.0255	0.0248	-1.0636	0.5417	-1.1181	0.9015	2.1299	0.4301	0.6173	1.2325
orf19.4625	TOA2	1.9782	1.0191	1.5658	1.7876	-1.5502	1.0456	0.7433	1.2886	0.9016	0.3556	0.3688	0.207	0.1634	-1.4625	0.4352	0.0349	-0.7145	-0.5252	0.241	-0.8438	-1.6269	-0.4792	1.541	-0.7574	2.4176	2.9404	2.3501	ND	0.7344	2.2247	-1.4604	-0.6561	0.2577	1.8322	1.2428	-1.8273	0.6973	1.1925	-3.3199	1.3039	0.7203	1.1656	1.5337	-0.7232	-3.1364	0.1157	0.3832	0.0112
orf19.107	DHR2	1.5146	0.6832	0.5118	0.7602	1.4535	0.3809	1.3374	-0.6949	0.1293	0.5228	1.0247	-0.5212	0.4491	0.735	-1.0875	1.3871	0.7574	0.4165	0.6303	1.3894	-1.2403	-1.287	1.5155	-0.1604	0.0546	0.8542	-0.1199	0.0469	0.0738	0.7422	-0.4604	-0.6353	-0.6838	-0.2554	0.3666	0.6794	1.6786	1.5947	0.7729	1.6178	0.9079	0.3456	1.797	-0.7054	-0.4663	0.0467	-0.5447	-0.9662
orf19.1618	GFA1	0.152	0.1756	-1.2065	-1.9264	-0.6034	-0.6164	-0.8066	0.3664	-0.4878	-0.5448	-0.7293	0.94	0.9737	1.2334	0.3727	0.0398	0.0275	-0.2846	0.1154	0.1685	0.883	0.7055	0.8402	1.1036	-0.9586	-0.9542	-1.9029	2.6553	1.6803	1.6209	0.4909	2.1661	1.3182	0.4079	-0.8844	-0.8553	0.4394	0.3222	0.24	0.5579	-0.2913	-2.512	1.3603	-0.5719	0.3018	0.1826	-0.3289	-1.4714
orf19.443	RPC25	1.5353	-0.8249	-2.0488	-1.5362	-0.7821	-1.1961	-0.722	-1.1797	-0.6312	0.2846	0.1964	-1.695	-2.2592	-0.9765	-1.3196	-0.6212	0.4899	0.7072	0.3048	-0.5417	-0.9765	-0.8452	0.5794	-0.7298	-1.6599	-1.3211	-1.2416	-0.6012	-1.0912	0.0811	-0.1512	-1.0057	-0.7025	0.5189	0.7684	-0.9398	0.5839	1.6107	0.7982	0.6762	-1.3677	-1.2812	0.9616	-1.4243	0.1394	0.1715	-0.8836	0.6758
orf19.441	RPT1	0.0382	-1.1444	0.2081	0.2654	0.0483	-0.5975	-0.2876	-1.2388	-0.6582	-0.5751	-0.3149	-2.7744	-0.9406	0.517	1.1548	0.2818	0.6455	0.0603	0.7224	0.0558	-0.6606	-1.2375	0.707	-0.6502	-1.5317	-1.4332	-0.9409	-1.3901	-1.4205	-1.918	1.3503	-1.0813	-1.7904	1.5332	0.4111	-1.4233	1.6924	1.0589	1.6292	-1.0792	-1.3752	-1.2349	-0.5136	1.5006	0.418	0.1539	-1.149	-1.191
orf19.4492	EBP2	-0.7497	-0.5614	-0.4801	-0.506	0.259	-0.3493	-0.9424	-0.527	0.0371	-1.3899	0.1128	0.2613	-0.7918	0.1677	-2.1148	-1.1407	-0.1702	-1.2043	-1.1606	-1.9124	0.0856	-0.4426	-1.165	-0.8807	0.1017	0.2348	1.1639	-1.1894	-1.0665	-1.1702	0.9883	0.4118	0.0418	-0.4018	0.2559	-0.5122	-0.5947	-1.6327	-0.0433	-1.0544	-1.4915	-1.4386	0.052	0.7047	0.3132	-0.1981	-0.9675	-0.2982
orf19.2974	YKT6	0.1904	-0.7	0.1442	-0.216	1.2686	0.6071	0.1279	-1.5048	0.2325	0.7843	0.5874	0.4719	0.3732	0.1854	0.0443	0.4028	3.1434	0.5543	0.8133	0.893	0.0387	0.1397	0.6762	0.225	0.3398	0.6064	0.743	0.9304	0.9863	0.2779	1.1014	-1.5883	-1.4318	0.7338	2.6069	-1.3386	0.5965	1.5625	0.3071	-0.4641	0.4008	0.5042	-0.4358	0.5523	0.0896	0.0381	0.0274	0.7895
orf19.7438	UBA1	-0.7229	0.6171	0.5257	1.2754	-1.2342	0.0338	0.8634	1.0442	1.7189	0.5259	0.6493	-0.3973	0.8539	-1.6825	0.1126	0.1862	-0.6182	-0.6971	-1.4852	-0.5672	-1.1117	-1.1819	1.0017	-0.6708	1.8696	1.2632	0.3854	-0.8897	0.5169	0.6111	-1.4406	-1.7977	-1.0996	-1.7552	0.1884	-1.3725	0.7145	-0.6326	-0.893	1.8261	0.4351	0.3332	-1.249	0.6217	-2.091	1.3523	0.523	0.4948
orf19.5425	TRZ1	0.0072	0.9309	1.4508	1.397	-1.456	1.5301	0.912	1.3805	1.1658	-1.0648	0.5104	1.4247	0.3335	0.7149	-1.4584	0.2025	0.803	0.7051	0.5755	0.3627	0.5388	0.4252	-0.6096	-0.6117	0.6122	0.7794	1.1291	0.1873	-0.5851	0.7158	0.0921	0.5347	1.1428	0.8703	0.4226	0.2634	-1.1524	0.3957	-0.9722	-1.0038	-0.8294	0.502	2.0847	1.4254	-0.3522	1.325	1.1534	-0.4354
orf19.2818	PRP16	ND	ND	ND	ND	ND	ND	ND	ND	ND	-0.8488	-1.1334	ND	ND	ND	1.4455	0.3617	0.174	-0.3294	-0.4574	0.0355	ND	ND	0.3201	-1.7759	ND	ND	ND	ND	ND	ND	ND	ND	ND	ND	ND	ND	ND	ND	ND	ND	ND	ND	ND	ND	ND	ND	0.161	0.0312
orf19.2407	DPS1	-1.3128	-1.3138	-1.212	-0.704	0.8128	0.4722	-0.8174	0.1734	0.0525	1.0107	0.8949	-1.2731	-1.0447	0.0914	0.5497	1.034	-0.4189	0.9164	0.2557	1.2265	-1.0893	-1.027	1.2787	0.119	-1.7635	-0.6203	0.4883	0.4231	-1.4645	0.0269	-0.6419	-1.4883	-1.9888	2.7349	0.4837	-1.1916	-1.077	-1.4813	-0.6633	0.2882	0.0272	0.1881	-0.9165	2.8629	0.1856	0.0234	-0.1478	0.879
orf19.1457	SSL1	0.4085	0.9855	1.0922	1.3582	-0.8437	-0.3387	-0.4329	1.4181	0.027	0.1421	0.1122	-1.0385	-0.7543	-1.4678	1.0042	-0.2226	1.0266	-0.0589	0.3369	0.6583	0.2778	0.266	1.3032	2.0278	-0.5719	-0.7791	-0.5602	-0.5613	0.2658	0.7863	-1.5621	-0.7363	-0.6583	0.9393	-1.3155	0.1575	-0.4582	-1.8465	0.3404	-0.7897	0.9645	1.3367	1.4051	1.414	-0.627	1.3082	1.1324	-1.0205
orf19.4191	RLP24	0.3632	1.55	1.0549	1.1582	-0.9421	1.6808	1.4072	1.0168	0.7545	0.2785	0.6108	1.5357	0.4549	-1.0398	-0.2926	-0.7993	-0.4327	-1.0678	0.2638	0.3216	-0.3076	-0.2462	-1.2568	-0.9313	1.8762	1.6418	1.4047	-1.0888	-0.622	-0.9481	-1.1965	-1.1604	0.2853	1.0996	-0.3029	0.7977	0.5406	0.8683	0.5132	-0.9914	-0.8326	-1.2398	-0.8671	-0.9604	0.6747	0.6265	0.8389	0.5592
orf19.2708	YLR022C	-1.7933	-0.8371	-0.4447	-0.8149	2.0408	-0.914	0.0553	-1.4866	-1.3069	0.0007	0.0007	1.3608	0.2765	0.0118	0.4055	-0.8846	0.6935	0.5848	-1.5844	2.8306	-0.9764	0.792	0.9063	0.0407	0.8128	-0.2152	0.3639	0.4428	0.7183	-2.3761	-2.1968	0.8349	-0.574	1.4162	1.8969	0.2631	0.2317	-1.2322	-0.3664	-0.6711	0.0292	-0.8775	0.3294	0.1046	-1.3703	-1.6004	-1.0668	-1.2144
orf19.6039	SED5	0.162	0.2098	-0.2153	-0.1746	-0.3982	1.0184	0.7507	0.3435	0.4149	2.2091	2.0248	0.5077	-0.213	-1.0022	-1.7843	-0.4945	-0.6347	-0.5354	1.3128	-0.0128	-0.4391	-0.6759	0.755	0.736	0.2467	-0.1412	-0.5205	-0.4409	0.2667	-0.188	-0.6825	-1.3337	-0.475	-0.0149	0.7479	-0.0585	-0.6436	-0.0806	-0.2579	-0.5011	0.4742	1.0376	-0.6694	0.7429	0.7888	1.6273	0.9351	2.0095
orf19.6175	YLR051C	0.6552	0.5235	1.1234	0.6911	-0.8506	1.7625	1.4219	0.9231	1.0476	0.8837	1.8043	1.2276	1.6269	-2.4421	0.0957	0.4304	0.2312	-0.2131	0.2728	0.3967	-0.8424	-0.6613	0.2956	0.1028	0.6675	0.7502	0.7975	0.0093	1.248	0.7922	0.3628	0.8228	1.5801	0.5093	0.5073	-0.8862	0.7198	1.2075	1.2189	-1.2162	0.2832	0.5906	-0.7418	-0.2312	-0.6892	-0.1467	0.8508	0.0274
orf19.2573	FRS1	-0.7554	-0.7804	-0.7652	-0.9908	-0.6011	0.1423	0.7326	-1.3999	-1.043	0.1485	-0.4778	-0.2934	0.1706	0.5545	-1.8707	-1.589	-0.3692	-0.2536	-1.0611	0.0036	-1.7251	-2.1879	0.319	-0.7842	2.8362	3.1031	2.3364	-1.4855	-0.3205	-1.7479	0.1013	-0.7792	-0.4559	1.6173	ND	-1.2747	ND	-1.937	-0.3959	0.0847	-0.8441	-1.3518	-1.9495	0.9883	1.1791	0.5933	0.5156	0.7857
orf19.2935	RPL10	ND	ND	ND	ND	ND	ND	ND	ND	ND	1.2122	0.7336	ND	ND	ND	0.4791	-0.546	0.2642	-0.5454	1.0148	-0.4023	ND	ND	-0.8131	0.4351	ND	ND	ND	ND	ND	ND	ND	ND	ND	ND	ND	ND	ND	ND	ND	ND	ND	ND	ND	ND	ND	ND	1.288	0.1679
orf19.2940	BOS1	0.5601	0.2089	-0.4441	-1.4753	1.6571	0.2383	-0.4977	0.4333	-1.2285	0.3648	0.4652	-0.5746	-0.4239	0.1175	-1.7358	-1.9447	-2.2158	-1.3773	-3.8668	-3.7773	2.1115	2.3433	1.592	1.9612	0.2499	0.1236	-0.5461	0.1127	0.6015	-1.2259	1.8086	0.0287	0.2915	1.8106	0.5332	0.6911	0.0896	-1.2675	-2.0266	-1.5831	-0.8297	-2.2649	0.5136	1.0647	-1.0738	0.9217	-0.3609	0.1573
orf19.3240	ERG27	-3.196	-0.2212	-0.8592	-1.2567	-1.8517	0.45	0.9037	-0.0341	0.7626	0.2977	0.6245	-1.2351	-0.5185	-1.6099	-0.4619	0.3229	-0.4155	-0.818	-0.497	-1.095	-1.6726	-1.8668	0.6755	-0.5454	-1.5379	-1.6921	-2.7909	-0.3168	-0.6984	-0.0868	-1.7013	-0.5093	-2.2471	2.1685	0.5425	0.6656	0.3449	-0.1444	0.1561	2.435	2.8481	1.1134	-0.3438	2.3079	0.9119	1.512	2.109	-0.1978
orf19.329	MSL5	0.459	-1.1445	-0.5752	0.2776	1.368	0.7632	0.3352	-0.8543	0.1894	0.5284	0.0007	-0.5646	-0.7913	0.1624	-0.6526	-0.1928	0.2789	0.6416	0.6645	0.4043	-1.2409	-1.2339	0.9512	0.1293	-1.2824	-1.1139	-0.9469	0.6224	-1.1738	0.0203	1.0883	-1.1188	-0.7929	1.271	0.9061	-0.8	-1.1395	0.3897	-1.1881	0.5906	-0.641	0.6439	0.5894	0.3804	0.0911	-0.7958	0.4337	1.7766
orf19.332	CLF1	-0.814	-1.1454	-0.9674	-0.7623	0.5349	-1.2231	-1.8852	-1.3087	0.5287	0.4301	-0.8436	0.4449	1.4574	0.524	0.1062	-0.2273	1.5438	0.1853	-0.9211	-0.661	-0.8665	-0.8022	1.4393	0.8382	-3.6992	-2.256	-2.4718	0.6175	0.3546	-1.8248	1.7832	0.0905	1.0554	0.3667	-0.9687	0.725	0.9342	0.9474	-1.4818	-0.9058	0.0776	-0.3354	-0.7982	-1.7354	-1.1129	-0.6788	0.509	-0.5306
orf19.5106	DIP2	-0.5112	0.1646	0.2553	0.0519	1.4744	0.3975	0.2941	0.5832	0.2342	-0.8013	-0.5795	-0.5039	-0.2582	0.6676	-1.4014	0.0274	-1.3077	-0.2471	0.2746	0.6072	-0.7881	-0.7929	0.3008	-1.6732	0.1539	0.0391	0.3099	-0.8867	-0.6212	-1.0129	0.7894	1.1907	0.1859	0.9608	0.4443	-0.9764	-1.5095	-1.2711	-1.3689	-1.0701	-0.6021	-0.3448	-1.0727	-1.0988	1.2436	-1.0513	-1.812	-0.145
orf19.4146	SMD3	-0.7299	-0.321	-1.189	-0.8305	-1.1622	-0.4512	-0.8341	-0.4333	-0.5804	0.5375	-0.1452	-0.9132	0.2398	-2.0506	-1.6835	-0.891	-0.9715	0.1879	0.3385	0.0565	-2.2366	-2.5642	-1.1042	-0.8345	-1.6283	-2.4435	-2.2012	0.6206	-1.9138	-1.6348	0.2944	1.6626	0.7369	0.9251	3.0753	0.1396	-1.5073	0.1539	-0.2543	1.023	-1.2391	-1.642	-1.0828	0.893	-0.7841	1.0128	0.8299	1.2757
orf19.1064	ACS2	-0.4478	-1.5753	-0.5567	-0.212	0.3403	0.16	-1.258	-1.0011	0.3089	0.4352	0.3862	0.1185	0.4163	0.8126	0.8435	0.8416	0.8015	1.16	1.1249	1.6502	0.0354	0.098	0.7298	0.4136	-2.8401	-3.2357	-4.1868	1.8188	2.2386	2.4151	0.4753	-2.2647	0.2143	0.9803	0.9886	-0.2472	-0.9662	1.4341	0.2552	0.0542	0.1021	1.526	0.2384	0.6046	0.927	-1.5127	0.5982	0.1582
orf19.3026	MAS1	0.4191	-1.3683	-1.1482	0.1219	0.1656	-0.8968	-0.9351	-0.8511	0.2572	-0.171	-1.2571	-1.4244	-1.0586	0.1986	-0.4265	-1.0891	0.8071	-0.7906	1.2332	-1.5172	-1.0583	-1.0144	0.9649	-0.4572	0.0253	-0.9557	0.2608	-0.5857	-0.5754	-0.7119	0.7729	-1.271	-0.7794	1.2697	0.7452	0.2137	0.0416	-0.61	-0.9725	0.02	-0.4812	-0.4365	0.6511	1.2791	-0.3791	0.2941	0.0372	0.4815
orf19.1833	CBF5	-0.8814	-1.6358	-0.9804	-0.5609	0.7892	-0.8442	0.5412	0.1939	0.0045	1.3171	0.6118	-1.1147	-0.9773	-2.0076	0.7759	-0.4022	0.067	-0.1675	0.2673	-0.1845	-1.493	-1.5371	1.4431	0.2438	-0.2101	0.2173	0.3063	0.8526	-1.0969	-1.4466	1.3574	-1.515	-1.1334	ND	ND	-0.2556	0.002	0.9204	0.3587	-0.1871	-0.8351	0.117	0.1018	0.9814	2.1122	-1.6323	-0.4588	1.1027
orf19.665	EMG1	-0.8737	-0.8069	-0.5478	0.2471	-0.7635	-0.4514	0.6968	-1.7301	1.8089	0.067	0.9966	0.2089	-1.22	0.225	0.1804	-0.3726	1.5784	1.0919	0.738	-0.4988	-0.9465	-0.8388	0.6859	0.5523	1.1762	0.8893	0.821	0.9826	0.1938	-1.1262	1.4116	-2.1382	1.2627	0.628	1.1142	-1.4447	1.8351	1.2356	-0.7045	0.5345	0.2784	0.5359	2.0565	-0.7371	-2.1711	-0.3508	0.0945	0.8654
orf19.4641	NMT1	ND	ND	ND	ND	ND	ND	ND	ND	ND	-0.2616	0.1428	ND	ND	ND	0.5442	0.6734	0.3074	1.7051	1.6246	1.1941	ND	ND	-0.8619	-0.2523	ND	ND	ND	ND	ND	ND	ND	ND	ND	ND	ND	ND	ND	ND	ND	ND	ND	ND	ND	ND	ND	ND	0.0355	-0.3736
orf19.7569	SIK1	0.087	1.0033	0.0505	0.0406	-0.5518	0.3074	1.2951	-0.9352	0.9601	0.2773	0.4029	0.6782	-1.1592	-1.8674	-2.5122	-1.1609	-0.4346	-0.9978	-0.5575	-0.3671	-0.8935	-0.9628	1.273	-1.0078	0.5016	0.966	0.4011	2.8775	-0.737	-0.566	0.7711	-1.0107	0.8506	-0.2832	0.0741	-0.1086	-2.6374	-1.5854	-2.2906	0.9587	1.0145	0.1783	0.0207	1.4347	-1.095	0.0807	1.8341	-0.4195
orf19.316	SEC13	-0.3955	-0.7023	-1.6637	-2.0894	1.8554	0.5412	1.1102	0.4923	-0.39	1.7904	1.6283	0.3532	-0.1699	2.4282	4.3925	3.3423	-1.4408	-1.6757	0.1079	-0.2747	2.0134	1.5454	2.218	2.3301	-1.0848	-1.088	-0.9458	0.1625	-0.2582	-0.4959	0.8294	0.4139	0.215	-0.4169	0.2157	-0.4734	-0.8512	-0.9805	-0.7286	0.658	1.5993	1.5698	-0.1983	0.1062	0.3539	-0.466	0.4772	0.5578
orf19.4268	UTP13	1.3231	0.38	-1.1755	-1.0079	1.3856	-0.7233	0.6605	-0.4202	0.0998	0.0007	0.0007	-0.9317	-0.6128	-1.9231	-0.7943	-0.7181	0.9341	0.0972	0.5034	0.3248	0.3675	-0.5434	0.0245	-0.8194	0.417	-1.1776	-0.5831	0.819	0.1846	-0.3796	1.9604	-0.6541	0.0864	-1.0583	-1.9611	0.2535	-0.3109	0.6776	0.3086	-1.4665	0.1281	0.3941	0.1758	1.6281	2.0069	1.4557	0.073	-0.4505
orf19.717	HSP60	-0.2619	-0.7538	-0.5981	-1.0029	1.645	-0.9792	-1.1444	0.119	0.3604	-1.5363	-0.5758	-0.8087	-0.4548	0.2976	-0.9967	-1.4597	0.7671	1.1834	-0.7166	-0.4162	0.2225	0.1368	-0.7852	-0.5896	0.3658	0.2397	0.8622	-0.5791	-1.4449	-1.2434	1.9314	0.6441	-0.2819	-0.7332	-1.2217	-0.192	0.6042	-1.064	0.2047	-1.4658	-1.431	-0.6268	0.4423	1.0817	0.1567	-0.7979	-0.3269	-0.8625
orf19.3393	DBP9	ND	ND	ND	ND	ND	ND	ND	ND	ND	-0.8383	-0.7556	ND	ND	ND	-0.5193	-0.5251	-0.5678	-1.4068	-1.2704	1.0787	ND	ND	0.4351	0.8858	ND	ND	ND	ND	ND	ND	ND	ND	ND	ND	ND	ND	ND	ND	ND	ND	ND	ND	ND	ND	ND	ND	-0.937	-2.3862
orf19.5486	YSH1	1.1117	-1.5148	-2.1604	-1.7422	-0.5537	-1.7707	-1.5288	-1.6179	0.0176	0.5379	-0.4109	0.8739	0.576	-0.3016	0.8462	-0.4534	0.6796	0.8038	0.0486	0.5531	-1.7664	0.122	0.0517	0.1715	-0.5781	-0.7357	-0.6184	-1.0071	-1.9974	-0.9388	-0.3581	1.1576	0.5833	0.0558	1.5122	0.2113	0.6576	0.5402	-2.8269	0.1792	-1.0506	-0.724	-0.9877	-0.91	-1.5395	-1.1512	-0.7562	-0.3708
orf19.825	GCD7	0.5892	0.3006	-1.9619	-2.9322	0.1032	-1.5685	-0.7326	-0.2707	0.1839	-0.6146	-1.3585	-1.3831	-1.8947	0.5186	-0.6281	-0.6638	0.3543	-1.0475	-0.2431	-0.9878	-1.1618	-0.7897	-0.7489	-0.391	-1.6102	-1.5971	-1.4603	0.5354	-1.3588	-2.7514	0.2745	-0.913	-0.9031	0.0279	-1.2213	0.0747	0.6811	-0.596	0.5275	0.2339	-2.1423	-3.2275	-0.4139	0.0739	0.7363	1.1772	-1.1559	-1.3336
orf19.5493	GSP1	0.2136	0.3871	-0.074	-1.1392	-2.2209	-0.4061	0.3698	0.1076	-0.8887	0.0008	0.0008	0.2263	-0.9966	-0.4348	-0.6591	-1.0179	0.3742	0.3006	0.0401	0.0028	-0.3806	0.2286	0.0125	-0.6666	-0.5408	-1.3933	-1.419	0.7187	-1.0953	-1.807	1.1258	0.4078	ND	0.2306	0.7421	-0.6263	0.6042	-0.2919	-0.4462	0.0366	-1.5734	-2.4279	-0.6354	1.2555	-0.9262	-1.5855	0.2157	-1.8559
orf19.7015	RPP0	0.8849	1.0479	0.7157	0.7259	-1.5567	0.1563	0.8336	-1.0647	0.3483	-0.2886	-0.7952	0.654	0.8802	0.0357	-2.8813	-2.2853	-1.7346	-1.698	-1.5169	-1.8937	-1.9686	-1.0412	-1.4115	-1.2467	0.3805	0.132	0.5473	0.6959	0.5069	-0.7796	-1.9185	0.3046	-1.1744	-0.2257	0.4214	-2.2274	-2.4408	-2.366	-1.477	-0.6369	-1.8051	-2.1247	0.047	0.0416	-0.7982	-0.8576	-0.6587	-0.5673
orf19.3681	KAP95	-0.7957	0.4842	0.3386	0.7502	-0.542	-0.7368	-0.6617	-0.5939	-0.3943	-1.0713	-1.2996	-0.1204	0.4926	1.1264	0.395	-0.9372	0.6525	-0.8904	0.4435	0.9028	-0.474	-0.6745	-0.6296	-2.3239	1.1827	1.2097	0.7532	-0.5797	-1.1266	-1.597	1.4376	2.7202	-1.0939	0.8509	1.0655	0.3074	0.4719	0.4555	0.397	2.0349	3.7763	ND	-1.755	0.0934	-1.3509	0.4132	0.6672	0.2395
orf19.6176	SEC61	1.0498	-0.9822	-0.9094	0.4112	0.0789	1.3548	0.1118	0.6505	0.1185	0.233	0.2185	0.1616	1.0282	-1.1956	0.6832	2.77	0.2697	0.1548	0.009	0.0469	0.767	1.0475	1.6087	0.4684	2.2556	0.0811	0.1053	1.5854	-0.895	0.6235	-1.0675	-0.9812	0.299	0.8625	1.5213	0.26	ND	ND	ND	0.6059	0.0604	-1.1656	0.1356	1.6509	1.6931	0.6575	0.6719	-0.9903
orf19.6432	AFG2	-1.2041	-0.2342	-0.5601	0.0241	1.277	-0.4101	-0.3066	-0.3298	-0.847	-0.8792	-0.7541	-0.6181	-1.396	-0.6755	0.3856	0.1492	1.3679	1.5474	2.1323	2.4588	0.5569	0.5473	-0.2227	0.29	-0.6249	-0.6864	-0.9618	-0.7093	0.269	-0.4985	1.3214	1.1568	0.7048	0.7458	-0.4078	-0.8087	-1.0141	-0.4893	0.8865	-1.3287	0.3265	-0.4388	0.6468	0.3296	0.9619	0.4965	1.0613	1.4703
orf19.6135.1	LSM3	0.1974	-0.4062	0.8659	0.5009	1.2487	-0.2302	0.2972	-0.6449	-1.5442	-0.8242	0.5671	0.5437	-1.1501	0.5012	0.0516	-1.7085	-0.487	-0.9798	-0.1922	1.2094	-0.7754	-0.8583	0.2449	-0.9408	1.5978	2.9125	2.7877	0.1031	-0.9808	-1.7874	0.0388	0.2958	0.3234	1.018	1.8746	-0.4559	1.9702	1.3735	2.1048	1.0827	2.8372	ND	1.294	-0.8382	-0.9142	1.0968	-0.6651	-1.8958
orf19.3001	TEM1	0.6358	-0.2868	0.8904	0.9357	1.8736	-1.047	-1.439	-0.884	0.6218	0.5647	-0.6319	0.0876	1.2283	0.8209	-0.5425	-1.0425	0.6754	1.5343	0.8459	0.8187	-0.3133	0.2264	-0.9429	-1.4276	-1.2488	-1.6995	0.1032	-1.9856	-1.8029	-0.9908	-1.6554	0.5902	-1.2364	1.2556	-0.3471	0.5831	1.6586	0.5391	0.3895	-1.0039	1.0638	0.3357	2.1664	-0.3588	-1.1789	-1.5641	-0.5489	0.2363
orf19.1560	POB3	2.3009	-0.6165	-0.445	0.0217	-0.7917	-0.5673	-0.8481	-0.4409	-0.7013	-1.0667	-1.1016	0.0345	-1.3199	-1.0244	-1.0541	-2.122	0.8122	1.1459	1.2939	0.6651	-1.0458	-0.6255	-1.0614	-1.9416	-0.3354	-1.1948	-1.2809	0.3903	-0.8053	-0.5287	0.4349	1.0364	0.3148	0.3778	0.0899	0.1851	0.0703	-0.4633	-0.7869	0.8743	1.0155	0.5523	1.2577	1.2115	0.6825	0.2618	2.1167	-0.7048
orf19.7335	PRE8	-1.5462	0.6196	-0.95	-1.3744	1.5749	-0.1244	0.265	1.1509	0.0032	0.0646	0.1043	-0.7344	-1.0906	0.316	-0.262	0.1555	1.4553	1.1288	1.017	1.0576	1.5778	0.6602	0.1694	0.0114	-1.1435	-1.2992	-1.9602	-0.4768	0.3023	-0.4013	0.7338	1.0887	0.8427	1.1896	0.0255	-0.9328	-1.5428	-1.3279	-0.6748	0.2491	-0.3809	-1.9679	0.3978	0.3514	-0.8396	0.1579	0.4227	-0.7084
orf19.7552	UTP14	0.2884	0.0894	0.9857	0.6381	1.9093	0.834	1.5006	0.7542	0.8089	0.2545	0.6114	0.4257	-0.2868	0.111	0.5638	0.4621	-1.4618	0.5396	-2.0921	0.9664	0.1031	0.082	0.1879	-0.1449	1.6708	0.9089	0.3704	1.2681	1.0625	-1.4458	ND	-0.5583	-0.3193	2.1859	1.1186	0.7081	0.3233	-0.6349	-2.1544	1.365	1.3033	-0.3615	-0.1561	1.7053	ND	1.1512	0.6319	0.1176
orf19.7307	YML125C	-0.4932	-0.6761	-1.0376	-0.4059	-0.5292	0.3267	0.2796	0.6524	-1.1641	1.719	1.3263	0.6303	0.0894	0.9129	-0.325	-0.5176	0.0962	1.1389	1.3104	1.6612	0.2216	-0.6648	1.6119	-0.8116	0.1199	-0.2081	0.7842	0.5014	0.1	-0.3599	1.1139	0.7424	0.2287	0.9207	0.6268	-0.2567	-1.4254	-1.4012	-0.7865	-0.2228	0.1158	0.1299	-1.6609	1.253	0.9638	0.8131	-1.5443	0.6773
orf19.7312	ERG13	-1.1944	0.1786	-1.413	-2.4336	1.4973	-1.1905	-1.1592	0.0865	0.0849	-1.2777	-1.054	1.3073	1.368	1.8628	0.1534	0.5659	2.2794	1.8681	2.3927	1.7057	1.4304	0.5655	-0.986	-0.8054	-1.8444	-2.4545	-2.2831	1.052	1.441	2.0212	0.3244	1.3207	1.3325	0.7468	0.1546	1.845	-1.7466	-1.4841	-0.9101	-0.6127	0.3714	-2.7532	0.0793	0.8029	1.8072	0.5956	0.9952	1.8842
orf19.6908	FOL3	-0.6935	-0.4585	-1.2921	-0.3571	-1.0676	-0.8482	-0.1711	0.1231	0.9568	0.8639	0.5229	-1.2656	-1.3672	-0.7715	-0.9305	0.3775	-1.5995	-1.1016	-2.4928	-0.6016	-0.6684	-0.3531	-0.7925	1.3028	-0.8071	-0.4567	-0.6719	-1.0166	-0.6655	-0.1541	-2.0156	-1.4472	0.157	0.1936	0.7029	-0.7672	-0.7561	0.2231	-0.9952	-0.2981	-0.558	-1.1075	-0.6781	-1.3568	-0.5914	-0.5146	0.4941	1.341
orf19.2090	ECM16	-0.3415	-0.1443	0.2639	0.4655	-0.4385	0.2868	0.4182	0.1028	0.4549	1.0848	0.8373	-0.4668	-1.182	-1.267	-2.65	-2.8086	0.5706	-0.1025	0.0785	-0.3613	-0.7507	-1.1382	-1.2473	-0.7569	-0.4421	-0.5176	-1.7468	0.3915	0.8146	0.1345	-0.3486	1.4406	0.9241	0.1422	-0.6061	-0.5546	-1.0887	-1.4511	-2.2971	0.4996	1.7458	0.83	0.8996	0.961	0.8595	-0.3385	0.9095	0.391
orf19.6355	RRB1	0.6055	0.5938	0.386	0.851	-1.8567	-0.668	-0.9389	-0.3578	0.2334	-0.2022	-0.6497	-2.4366	-3.294	0.9853	-1.0888	-1.3273	-1.4874	-0.4015	0.7367	-1.9004	-1.3914	-1.2857	1.1294	-0.8234	0.0251	0.1158	1.1712	-0.6209	-3.003	-1.5314	-1.1424	0.0213	-2.7537	1.4626	1.5092	0.625	1.4305	0.9508	0.081	-1.0717	-1.7579	-1.4256	0.6518	0.1488	0.5684	1.1341	0.1568	1.2657
orf19.2967	TIF34	-0.6549	-0.6265	-1.0051	0.057	-0.5673	-0.2424	-0.2858	0.699	0.6639	-0.3464	-0.2655	0.1821	-1.0292	1.3126	-0.6652	-0.5416	-0.7008	0.1974	0.5524	-0.4509	-0.7578	0.1815	0.4426	0.1828	0.1981	0.3238	0.1229	-1.4719	-1.6456	-1.7778	1.0193	0.67	0.5682	0.6982	-0.8482	0.4798	-1.5717	-1.853	-0.526	0.2463	-0.9263	-2.554	0.0296	-1.957	0.1089	-0.8261	-0.5228	-0.9425
orf19.4809	ERG12	-0.8487	-1.5131	-0.6829	-0.592	0.7097	-0.7959	-1.2016	0.1054	-0.3809	-1.7867	0.0691	0.3544	-0.6025	0.3879	4.0429	3.7708	0.1611	1.2461	0.102	0.6162	0.3832	0.3549	-0.1627	0.2278	-0.2597	-0.5789	0.6916	-1.1773	-0.9888	-1.171	0.549	-0.2557	-0.4782	0.2243	0.2369	-0.7977	-0.5368	-0.3561	-0.7862	-1.4336	-1.4068	-0.6008	-0.1092	1.1147	0.9461	ND	0.374	-0.1089
orf19.4799	CEF1	-1.0136	-0.2484	-0.5962	-1.0148	0.4816	0.0281	0.0097	0.639	-0.5151	0.6966	0.6471	0.3149	0.551	1.414	-1.7725	-2.42	0.0848	-0.7633	-1.0007	-1.9993	1.1384	0.8504	-0.3276	-1.0823	0.1152	0.1184	-0.1841	-1.611	0.7641	0.4731	1.2832	1.0557	1.1201	1.0144	0.6032	-1.4364	-1.1849	-1.4492	-1.0408	-0.7942	0.0394	-2.0279	0.3222	0.9997	1.2462	0.6486	-0.5016	-0.5823
orf19.1578	RRP5	0.8539	0.3714	1.1004	0.482	1.994	1.7463	1.2256	0.2117	1.5241	1.0507	1.5117	1.2515	0.8204	1.02	-0.5492	0.6025	-1.3398	0.9783	0.8386	0.6962	0.554	-1.0797	-0.7223	0.5177	0.4932	0.4158	2.4671	0.6532	0.156	1.5143	0.2792	0.9663	2.2379	-1.6374	0.2063	-1.4623	1.0739	0.9191	0.3178	1.0278	0.562	1.5287	-0.4361	-0.8317	-0.6481	-0.3058	0.628	1.6898
orf19.7581	CUS1	-1.7223	0.8537	1.3049	1.4079	0.0507	0.4224	0.6675	-0.8082	-0.4319	-0.4599	0.232	1.899	1.3496	-0.939	-0.854	0.7211	-0.5455	0.1126	-0.7902	0.5093	1.6087	3.0263	-0.9992	0.5553	0.7325	1.8482	1.1928	1.5739	0.4639	0.8469	-1.1219	0.0716	0.6252	1.0042	0.5637	2.2591	-0.9759	-1.5757	-0.7689	-0.6512	-0.3429	0.2444	0.1796	1.8685	1.9076	2.3528	1.0643	-0.3854
orf19.5351	TIF11	0.8225	0.6614	0.2392	-0.1617	1.5296	0.0231	0.1483	-0.7977	-0.3898	0.0007	0.0007	0.4143	0.3913	-1.0778	-1.1519	0.2393	-0.3813	-1.3003	-0.8589	2.8454	0.0194	0.5321	-0.5764	-0.914	2.7197	1.334	1.9692	1.8038	0.25	-0.7003	-1.0922	-2.1535	0.561	0.8498	1.8442	0.1271	0.8702	0.3849	-1.0276	-0.6897	0.4949	-2.5024	0.2675	1.2616	0.9717	3.0996	0.32	-1.1629
orf19.6438	LCB1	1.1992	0.5228	0.0234	-0.3549	0.9944	0.6824	-1.355	0.3804	-1.809	0.0007	0.0007	0.4587	0.0213	-1.0003	-0.8196	-1.0428	-1.5789	0.4832	0.1985	0.7193	-1.3948	0.5706	-0.5593	0.2307	0.3292	-3.0844	-5.1423	ND	ND	ND	1.7551	0.6542	0.6947	2.6847	1.1642	0.7356	-1.6053	0.1669	0.782	-1.4369	-1.2912	0.1951	0.277	-1.3176	1.1232	0.8215	-0.6943	0.0771
orf19.5085	PSE1	0.6367	-0.9051	0.0781	-0.2813	0.3807	-1.3839	-1.4316	-1.2787	-0.5821	-2.8814	-0.7767	-2.286	-0.2995	-1.3085	-2.7477	-1.0333	0.2353	-0.5694	0.1358	0.1525	0.1146	0.5259	-1.4226	-1.6468	-1.883	-1.682	-0.3678	-1.6172	0.0669	0.9773	-0.7222	0.7103	-0.5906	0.2098	-0.412	-1.6537	-1.0429	-0.7239	-0.7835	-1.3051	-1.0921	-0.4484	0.8944	-1.1304	0.0543	0.5901	0.334	1.4819
orf19.7178	PRE5	0.2934	1.9819	2.3011	1.728	0.3998	2.0812	1.41	0.959	1.2488	1.2237	1.1758	0.9321	-0.5646	-0.8067	0.0287	1.1158	-0.1394	0.1316	0.6541	1.3919	0.1998	-1.0517	0.5403	0.5498	-1.3147	-0.6967	-1.4919	-0.9444	-0.5712	-0.5922	-0.578	-1.0293	0.294	-0.9304	-1.1454	-0.6508	-0.9272	-1.5611	-1.1634	0.3029	0.9344	1.0452	-0.4891	1.7924	-0.2918	0.6706	0.8231	-0.9714
orf19.3867	RLP7	0.113	-0.9663	-0.7073	-0.7112	-0.1523	-0.9681	0.536	-1.0366	-0.5156	-0.9751	-1.2464	0.1704	0.3736	0.5622	-1.6145	-0.3722	-1.4276	-2.0077	-1.6802	-1.3736	-0.5466	-0.624	-0.464	-0.5777	0.8151	0.2743	0.5994	-1.1198	-0.6798	-1.0979	1.3828	0.2906	-0.6913	1.1983	0.2182	-0.91	-0.7955	-0.9672	0.1149	-0.9603	-1.4073	-1.1898	-0.2624	-0.3637	0.5968	0.0942	-0.6025	-0.4866
orf19.3862	LST8	-1.3571	0.8339	0.2965	0.3029	0.3515	0.5115	-0.8404	0.8203	-0.456	0.0007	0.0007	-1.1838	0.5542	0.3395	0.7181	0.2534	-0.5965	-0.6039	-1.1868	1.325	0.4382	0.7837	-0.8958	0.2892	0.2623	0.9312	1.1638	0.3236	0.2255	0.4181	0.7755	1.3189	0.3935	1.1536	-1.2747	-1.0026	0.0908	-1.3868	0.043	0.7023	0.2275	0.5062	-0.8311	0.0104	0.146	0.5558	0.1531	-0.5123
orf19.3861	SIS1	0.325	-2.1414	-1.4769	-1.1653	1.3626	-1.5469	0.0518	0.2757	0.3185	-0.5169	0.3853	0.6645	0.1742	0.8055	-0.4426	0.0081	0.3246	0.6986	-0.2258	-0.5636	-0.6079	0.105	-0.826	0.2948	0.0799	0.2163	1.5705	0.9394	0.0281	0.0292	1.4316	1.4501	0.3673	0.7957	1.225	-1.2092	0.5369	-0.7341	-0.603	-0.5093	0.323	1.2642	0.2817	-1.5793	0.2546	0.1932	-0.0654	-0.2632
orf19.501	NOP2	-0.1526	-0.614	-0.7355	-1.0059	-0.5141	-0.5961	-0.7128	0.4447	-0.5637	-0.4898	-0.7274	0.0969	-0.6144	0.1714	-0.5533	-1.0818	-0.6068	0.3881	-0.7524	-1.2279	-0.6707	-0.7292	-1.0285	-0.687	0.3007	0.5315	1.0231	-0.7684	-1.3923	-1.6178	1.0638	0.3306	-0.6161	0.8986	-0.4209	-0.2438	-0.6477	-1.1994	-0.4156	-1.0187	-0.7091	-1.0213	-0.713	-0.242	1.4497	-1.0872	-1.4899	-0.3004
orf19.5873	POL1	0.1997	-0.6982	-0.8532	-0.6454	0.0393	-0.9262	-2.1355	-0.6455	1.1675	0.4343	0.0994	-0.6635	-0.3977	-0.346	0.8603	0.1117	-0.8358	-0.6427	-0.8455	0.4304	0.2315	0.037	-0.4468	1.1224	-1.3023	-2.1185	-1.1299	-0.8087	0.0325	-0.737	1.405	0.7406	0.7274	0.857	-1.0472	1.1523	-0.9518	-0.7543	-0.4948	0.145	0.3455	0.0146	-0.7137	-1.177	0.5731	-0.9773	-2.2382	-0.9144
orf19.172	RPC19	-1.4905	-1.5877	-1.0128	-0.6689	1.4152	-0.2646	-0.227	-0.8301	-0.9887	1.1054	1.2317	-1.4512	0.5242	-1.7386	0.0597	-1.3622	0.2212	0.1915	-0.3271	0.6364	-0.452	-1.5557	1.3009	0.4976	0.0505	-0.4216	0.2829	-0.9166	-1.1116	-0.6375	0.549	-1.7932	-1.3508	-0.8197	0.3184	1.1178	0.9588	-0.7639	-1.239	1.2664	0.6007	1.2285	0.6922	1.9202	0.4025	0.237	0.5312	0.0546
orf19.6312	RPS3	0.0327	0.0387	-0.5273	-0.7824	0.159	-0.7519	-0.988	-0.6605	-1.0074	0.0007	0.0007	-0.4506	-0.7255	-0.9143	-1.1936	-1.4015	-0.2552	-0.8903	-1.4011	-0.2752	-0.9982	-1.1632	-0.8985	-1.3846	0.5475	0.171	0.4478	-0.9605	-1.2865	-0.9295	1.2081	0.1727	-0.8203	-0.8497	-1.5044	-0.5614	-1.7444	-1.1697	-1.9409	0.1264	-1.0919	-1.1622	0.2902	1.0678	1.0164	-0.9962	-0.2347	-1.5592
orf19.5682	SRP1	ND	ND	ND	ND	ND	ND	ND	ND	ND	0.1133	-1.2669	ND	ND	ND	0.3623	-1.0438	0.6281	-0.6846	1.4773	-0.3039	ND	ND	-0.6133	-1.5796	ND	ND	ND	ND	ND	ND	ND	ND	ND	ND	ND	ND	ND	ND	ND	ND	ND	ND	ND	ND	ND	ND	1.5926	-0.3852
orf19.1280	SUI1	-0.5304	-0.2797	-0.2341	-0.7905	-0.7412	0.7372	0.8355	-0.6115	0.4229	0.4731	0.5323	-1.9764	-1.4569	0.1489	-1.1119	0.5438	1.3032	0.4778	2.6575	1.1501	0.8084	1.3409	1.4739	0.7152	2.0068	0.8844	0.3913	0.1209	-1.7024	-1.1399	0.7957	-1.8175	-1.5908	3.3463	1.9814	0.3406	0.3751	0.4998	1.098	0.8556	-1.0907	-0.4869	-1.8644	1.2587	0.8923	1.8279	0.5484	1.1667
orf19.4931	YNL247W	1.2334	-0.5329	0.3555	0.4316	0.8812	0.5032	1.739	1.0195	0.2138	1.1225	2.0249	0.4067	0.0096	0.522	0.2173	0.7081	0.2754	0.0656	1.0112	1.4085	-1.3236	-1.3736	0.7586	0.4159	0.3566	-0.1524	-0.7609	0.4709	0.1816	0.6036	-1.8045	-1.5842	-1.3004	0.4425	0.5314	0.2939	0.866	0.7336	0.6547	1.6706	1.2298	1.138	1.087	-0.8249	-1.3332	0.2405	0.2807	0.21
orf19.759	SEC21	-0.9177	-0.3286	-3.4122	-3.4887	0.2528	-1.331	-0.5826	0.3355	-1.0139	0.0459	0.0778	-1.1187	-0.6854	0.5071	0.2028	0.305	-0.9299	-0.5695	0.2543	-1.1923	0.3697	0.4591	1.6897	2.094	-1.5629	-1.3899	-0.7288	-0.2554	1.2343	1.9362	0.4311	1.2168	1.2066	1.5858	1.7182	1.6333	0.0641	-0.8697	-1.3721	0.1144	-0.8552	-1.3943	0.437	-0.4892	0.1755	0.2259	-1.521	-2.3352
orf19.7466	ACC1	ND	ND	ND	ND	ND	ND	ND	ND	ND	0.1512	-0.287	ND	ND	ND	-2.3941	-0.9198	-0.9247	-0.4903	1.7598	0.7951	ND	ND	-0.846	-0.8434	ND	ND	ND	ND	ND	ND	ND	ND	ND	ND	ND	ND	ND	ND	ND	ND	ND	ND	ND	ND	ND	ND	0.8774	-0.7827
orf19.6105	MVD1	0.3555	0.606	0.147	-1.5696	-1.7275	1.6049	1.0957	-1.1591	2.2819	0.717	1.6539	2.8647	2.8614	0.9495	2.9364	2.5625	0.6415	0.3594	1.0611	0.5544	-0.2972	0.2126	0.4689	0.6886	1.0735	0.5727	1.0888	0.6292	0.6818	1.2717	0.8266	1.4373	1.0503	0.1335	0.6526	0.7436	-1.5865	ND	-2.4499	1.4411	0.353	1.0158	0.1723	1.3684	1.3676	1.2244	0.8273	0.5133
orf19.1886	RCL1	-1.2937	0.9777	-0.8292	-0.7937	2.1318	0.0017	1.3319	0.8321	-1.5703	0.9111	0.8613	-0.7684	-0.8155	-1.423	-1.5637	-1.9139	1.049	0.4033	0.2669	0.7214	0.5921	0.8811	0.4218	1.0031	-0.707	-1.5212	-1.4805	-1.7489	0.1111	1.064	1.0917	1.1404	1.6091	1.9751	0.7975	1.0944	0.0554	0.114	2.6517	-0.8003	0.9947	-2.2724	ND	0.1025	1.4597	-1.8551	0.0088	0.5283
orf19.7658	RFC4	0.2796	-0.7022	-0.3975	0.8982	0.4322	0.892	0.9181	1.414	0.5227	1.347	1.4076	0.1254	0.4673	-1.8512	0.8192	0.7769	0.8451	0.2404	0.8668	0.4587	-0.8316	-0.8051	0.0501	-0.9154	2.7925	0.7378	0.597	1.4956	-0.3038	0.4514	-1.8753	0.8609	1.5241	1.79	1.7042	2.0719	0.7885	-0.1128	-1.3158	-0.3308	0.6601	0.4069	0.4689	1.2934	1.271	0.7265	0.1481	0.6426
orf19.7626	CDC33	1.069	1.159	1.3986	0.5225	-1.5349	1.5686	1.2408	1.0137	-0.7024	0.1115	0.2095	2.2559	2.8767	-1.1058	1.2205	2.3028	-0.4109	-0.8595	1.4497	0.4291	-1.1026	-1.3936	-0.7527	-0.0283	0.7947	1.7276	2.1187	0.0413	1.4862	1.0032	-1.4907	-0.6396	0.8392	-1.1872	0.4603	-0.1011	-0.8336	0.5979	0.3155	0.1727	-1.9423	-2.3841	-1.8195	-1.1434	-0.7548	0.4142	-1.356	-0.6814
orf19.4681	RAT1	ND	ND	ND	ND	ND	ND	ND	ND	ND	0.0008	0.4285	ND	ND	ND	-1.7616	0.1357	-1.1562	-1.4993	-0.5014	-0.361	ND	ND	0.0297	0.032	ND	ND	ND	ND	ND	ND	ND	ND	ND	ND	ND	ND	ND	ND	ND	ND	ND	ND	ND	ND	ND	ND	0.6889	-1.0874
orf19.6955	NOB1	0.7034	-0.5627	0.4386	0.6602	1.3771	-0.9797	-0.7864	-0.353	-2.4023	-1.6736	0.0266	-2.0974	-0.7245	-0.5291	-1.3421	-0.1924	-1.6906	-1.6686	-1.2827	-1.4944	-1.1063	-0.8682	-0.1079	0.4455	-0.7511	0.118	-0.3896	-1.0883	-1.6478	-1.0811	1.4254	0.5424	-0.9426	-0.9716	0.72	0.8343	0.586	0.4062	0.7764	-1.081	-1.1428	0.582	0.0287	-1.2196	0.3551	-0.6896	-1.1465	0.488
orf19.1601	RPL3	ND	ND	ND	ND	ND	ND	ND	ND	ND	1.326	0.7756	ND	ND	ND	-0.5648	-0.5183	-1.2594	-0.8338	-0.6179	-1.0738	ND	ND	0.3734	0.6774	ND	ND	ND	ND	ND	ND	ND	ND	ND	ND	ND	ND	ND	ND	ND	ND	ND	ND	ND	ND	ND	ND	-0.9676	-0.5583
orf19.3817	RTS2	0.7647	-0.4344	0.3257	0.0541	1.3089	-0.4912	0.2172	0.9026	0.3629	0.75	0.6609	0.6964	0.2441	1.6124	0.3145	0.3275	1.6748	-0.8029	-0.3123	1.3977	-0.8491	-1.6427	0.6341	0.4787	-0.5157	-1.4701	0.0811	0.1259	-0.7963	-0.2323	-1.0518	-1.3347	0.9348	0.6127	-1.2551	0.4892	1.2005	0.7525	1.8053	1.1975	0.6594	1.0422	0.2851	-1.0769	0.165	0.6198	-0.814	2.112
orf19.1761	OST2	-1.4111	0.5225	0.4932	0.4244	-2.1062	0.8155	-0.8865	-0.8331	-1.0626	-1.1382	-1.5055	0.521	1.1888	-1.2987	-0.0691	0.4371	0.0362	-1.7814	0.7197	0.2419	-1.8885	-1.8777	0.0892	0.2205	0.7398	0.7603	2.5974	-1.1102	0.0289	0.7004	-0.7009	0.0768	0.2002	-1.1435	-0.1514	-0.662	0.5419	0.1497	0.5855	-0.7633	-0.8181	-1.3017	-1.9631	0.6313	0.494	2.0118	1.5704	-1.519
orf19.3103	RPO31	0.0897	-0.0585	-1.8033	-1.1831	-1.1237	-0.0736	0.3665	0.5813	-0.7707	0.5827	0.8415	0.9	0.2444	-0.976	-0.6186	-0.1485	-1.1317	0.5229	-0.3908	0.3081	0.0635	-1.2437	-0.5328	0.243	-0.9153	-1.5845	-0.712	0.295	-1.0123	-1.2402	-0.4741	-0.5844	0.7864	0.1549	-1.443	0.7782	-1.0275	-0.7042	-1.3172	-1.6103	-1.323	-1.0092	-0.311	1.616	-0.5071	0.3909	0.2187	-0.3253
orf19.3123	RPT5	-0.8776	1.4767	1.5628	1.31	-0.6935	0.7306	0.7272	0.88	1.0645	0.1898	0.2932	1.2756	-1.635	1.3174	1.8589	2.1918	0.6438	1.0401	0.9929	0.5523	2.0643	1.351	-0.6434	0.3741	-0.6598	-1.137	-0.9127	0.1217	-0.685	-0.1356	0.162	0.0263	-0.4824	1.1614	0.2136	0.9071	-0.7427	-1.3009	-1.4685	0.0187	-1.0756	-0.7326	0.0677	2.2431	0.5943	1.0535	-0.7593	-1.7016
orf19.3349	RPB2	1.0059	1.2443	0.4548	0.3539	0.085	0.7073	2.0376	2.0688	0.2507	0.0008	0.1255	0.6457	1.4559	1.351	-0.8769	-0.9407	0.156	0.2358	0.5208	0.1309	0.21	0.0406	0.3714	-0.4811	0.7614	1.6417	0.5143	2.3965	0.5997	1.1214	-1.0326	2.0991	ND	-1.9689	1.2704	1.0956	0.8772	ND	-1.7884	1.7171	3.1014	2.1811	0.2369	-0.9473	0.4911	0.7908	0.7598	-0.356
orf19.7605	PUP1	0.3889	3.1681	2.5385	2.1439	0.07	1.8986	2.0192	1.1338	0.4571	0.7202	0.6576	0.2096	-0.1996	0.5514	0.2438	1.2874	-0.7746	-1.9212	0.0718	-0.9988	-0.6198	-0.9828	0.0934	-1.1013	0.0678	0.4349	-0.2613	0.5755	-0.325	-0.5121	0.3453	-0.6539	0.6075	-0.7953	0.9239	0.3591	1.2039	0.5109	-0.8139	0.5707	1.8198	0.9835	-0.9967	0.0028	0.2076	0.0273	0.7338	-0.6642
orf19.4205.1	SME1	-0.7845	0.3309	-1.8247	-2.6021	-0.532	-0.215	-0.8141	-0.5805	-0.0703	-0.2802	-0.8907	0.2705	-0.1641	0.5046	0.1281	-0.2729	-0.9319	-0.7191	-0.8634	-1.0328	1.2696	1.0179	0.037	0.6516	-0.5492	-1.1268	-2.9222	1.1422	1.2462	1.1792	1.5947	1.5813	2.1776	-1.68	-1.7086	-2.2285	-1.0693	-1.5258	-1.1077	0.6063	-1.1601	-3.2026	1.4698	-0.6496	0.8771	-0.079	0.2246	-1.5223
orf19.7064	GLN4	0.3721	0.5654	0.7183	0.8375	-0.8829	1.7474	0.0816	1.1602	1.4756	-0.3538	0.0618	0.7687	0.9005	0.7493	1.4878	0.6257	-1.1432	0.5737	-0.1642	0.9854	1.0095	0.3333	0.9232	0.0752	1.12	1.6538	1.3994	1.2947	1.5731	0.7272	-1.3216	-1.7906	0.0323	0.943	0.5615	-0.2172	0.6092	-0.4941	0.1134	-0.7641	0.0391	0.3361	-0.9093	1.4669	-0.7854	2.5614	0.2699	0.0704
orf19.2682	TOA1	0.5598	-0.5146	0.4181	0.4827	1.9403	1.4357	1.7723	-1.5149	-1.3067	1.189	0.773	1.1027	-0.7243	-0.8067	-0.7352	-0.6577	-0.4466	0.0013	-0.4409	-1.5872	-1.1577	-0.8183	2.1681	-0.7318	1.2498	1.5577	1.4644	0.4655	-1.0882	-1.8974	0.0853	-1.5205	-1.5274	0.5482	0.7455	0.1372	-0.4288	0.5886	-0.8693	1.497	0.5795	0.68	-0.1955	-0.5165	-0.6142	-1.4458	-0.8564	0.2633
orf19.5847	RET1	ND	ND	ND	ND	ND	ND	ND	ND	ND	0.7746	0.2752	ND	ND	ND	-1.8823	-0.9465	-0.6143	-0.8041	-0.9074	-1.0635	ND	ND	0.7751	0.3512	ND	ND	ND	ND	ND	ND	ND	ND	ND	ND	ND	ND	ND	ND	ND	ND	ND	ND	ND	ND	ND	ND	-0.9959	0.1227
orf19.2687.1	RPB10	-0.3833	-0.8578	-1.1629	-0.6898	0.1688	-0.6104	-0.7508	-0.9941	-0.3522	0.1285	0.0008	-0.5342	-0.9685	-0.8466	-1.0835	-0.4971	0.542	0.6954	-0.2031	0.5974	0.6833	0.429	0.6137	-0.6302	0.7356	-0.0931	0.2657	-1.846	-1.4086	-1.7919	0.598	-1.5001	-0.9655	0.5623	1.6797	-0.3874	-0.7094	-0.7174	-0.4035	0.3098	-0.3246	0.7228	0.3924	0.966	0.9665	0.3312	0.1558	-0.5636
orf19.6891	RFC1	-0.5289	-1.0404	-0.9156	-0.4402	1.2845	-0.959	-1.4695	-1.6075	0.0511	-1.6801	-0.5376	-0.9244	-1.3096	-1.81	0.3658	-0.9893	0.3585	0.3516	0.9985	0.2338	0.7098	1.0229	0.1668	-0.3196	0.2698	-0.4622	0.7435	-0.3774	-0.6463	-1.4546	1.1548	0.9572	-0.7509	0.6829	0.87	-1.2317	0.4999	0.0319	0.5839	0.1694	-0.528	-0.5957	0.9824	0.6166	0.697	-0.4722	-1.0404	-0.9691
orf19.6314	RPB8	-0.0658	-0.3576	-1.4798	-1.4993	0.2521	-0.6844	-0.4678	0.227	0.4212	0.0799	-0.5527	-0.6711	0.2485	0.176	-2.7392	-3.4151	-1.0783	-0.8984	-2.8213	-1.5142	-0.627	-0.7268	-1.4381	-0.7446	3.0385	2.9695	3.574	-1.7549	-2.0538	-2.6976	1.534	0.2884	0.3752	-0.6422	-0.6199	-1.781	-0.9521	-1.257	-1.3793	-0.8119	1.4242	0.821	-0.6456	-0.3658	1.3347	-0.5101	-0.7158	-1.3398
orf19.2524	MGE1	0.6227	0.1624	0.7314	-0.3026	-0.1993	0.5	0.7752	1.6671	0.5271	1.2399	1.3755	0.576	2.878	2.6374	2.4427	1.5395	1.4017	-0.4067	0.0451	-0.3397	-0.9326	-1.0624	1.4442	1.0528	0.259	-0.2223	0.059	0.8353	0.8723	0.5295	0.799	0.7265	0.6296	1.5028	1.5666	-0.4727	1.7446	2.5103	1.0514	1.5615	1.1185	1.3928	0.544	1.5824	-1.5324	-2.3143	0.8292	0.307
orf19.482	RPT4	-0.8689	-1.0608	0.5548	1.2952	0.3901	0.2072	-0.2899	-0.8061	-1.8324	1.5558	0.6409	-1.6655	-1.4426	1.2088	2.2457	1.5985	-0.395	1.051	-0.366	-0.634	0.6704	-1.1077	1.04	0.7488	-2.0019	-1.8717	-2.2849	-0.1304	-1.1829	-1.7093	1.6481	-0.5325	-2.2746	0.452	-1.7611	0.7829	1.9182	0.4338	1.1694	-0.5986	-0.9388	-0.6498	-0.8101	-0.8732	-0.7936	0.3926	-1.5319	-1.9494
orf19.3168	RPN8	ND	ND	ND	ND	ND	ND	ND	ND	ND	0.8384	1.1169	ND	ND	ND	-0.48	-0.6354	3.8795	2.9934	3.5988	2.5365	ND	ND	0.9446	0.6259	ND	ND	ND	ND	ND	ND	ND	ND	ND	ND	ND	ND	ND	ND	ND	ND	ND	ND	ND	ND	ND	ND	-0.3634	-1.9108
orf19.4815	YTM1	-1.2243	-1.3736	-1.1935	-0.4426	0.3836	-0.431	-0.7002	-1.6752	-0.8724	-0.7428	0.4649	-1.1538	-0.8399	-0.6435	-0.8407	-0.7629	1.0575	-1.8422	-2.4103	0.3055	-0.4638	-0.9119	0.0385	0.3621	0.4984	-0.529	0.636	-1.885	-1.5444	-0.5438	1.2667	0.4665	0.1682	1.4255	0.7311	-0.103	-1.2572	-0.6285	0.424	-0.7722	-1.0514	-0.5644	-1.3138	1.1692	0.6482	0.7107	0.1157	0.1955
orf19.6014	RRS1	0.7745	0.3101	0.582	0.4713	-0.2964	-0.0447	-0.3063	-0.9765	0.0459	0.0687	-0.4401	1.1504	0.112	0.9785	0.0821	-0.7483	-0.6871	-0.7341	0.2965	-0.8472	0.3192	0.0253	-1.1877	-0.6936	1.0481	0.7087	1.3184	-0.3004	-0.3532	-0.4086	0.0769	0.0793	0.1972	1.3144	0.3432	0.292	-1.9055	-1.2138	-0.9446	-1.4558	-0.7785	-1.2788	-1.4149	0.8164	1.0198	-0.2254	1.0076	-0.7323
orf19.1199	NOP58	ND	ND	ND	ND	ND	ND	ND	ND	ND	0.223	-0.4477	ND	ND	ND	-0.3345	-0.5822	0.1482	-1.8556	-2.2145	-1.0944	ND	ND	-1.211	-0.2735	ND	ND	ND	ND	ND	ND	ND	ND	ND	ND	ND	ND	ND	ND	ND	ND	ND	ND	ND	ND	ND	ND	1.132	-1.1053
orf19.2261	HSH49	0.2035	-1.0199	-0.7567	-0.7128	1.7361	0.5352	0.7285	0.1129	-1.1972	0.9438	1.2227	-2.0466	0.14	0.3214	-0.8157	-0.3245	0.6155	0.4402	0.1209	0.4001	-0.5308	-0.9163	1.5905	1.4831	-0.6077	0.4962	0.5372	-0.8523	-1.4723	-1.3969	1.4199	0.6116	-2.0968	0.4483	1.9599	2.2311	-0.9157	2.2613	1.341	-1.1612	-0.4427	0.2406	0.0113	1.0265	0.6913	-1.0453	-0.7258	1.3865
orf19.5015	MYO2	-0.143	1.7525	1.551	0.8593	0.251	1.3074	0.6714	1.7614	1.5504	0.0609	-0.5919	1.726	1.0514	-0.699	-1.11	-0.4485	-0.3581	0.64	0.9629	1.1293	-0.4741	-1.078	-0.4145	-1.1703	1.4401	0.9684	0.466	1.0631	1.2301	1.9954	0.5164	1.9433	1.7166	1.2011	1.5988	1.0104	-1.6001	-0.2381	0.0779	0.734	0.3815	-1.3971	1.7343	-1.035	-1.1759	0.5239	1.9215	-0.5955
orf19.5746	ALA1	-0.5291	0.1417	1.1063	1.426	-0.6735	0.483	0.1894	1.006	0.5502	-0.834	-0.6865	0.7763	0.8251	-1.076	-1.119	-1.2408	1.638	2.558	-0.903	1.1762	1.0779	0.3068	-1.6308	-1.3274	0.4324	0.7986	0.5365	-2.3492	0.0502	1.3001	0.7276	-0.9345	0.1423	1.2914	-1.7875	1.9521	-1.4134	-1.9542	0.6827	-0.8106	0.2225	-1.4592	1.0013	2.8525	0.4638	0.208	-0.8704	0.1774
orf19.1839	RPA190	0.586	-1.1081	0.2585	-0.35	0.3368	0.8879	0.5151	-1.3305	-1.7839	-0.0686	-0.8694	-0.7095	-0.6493	-0.4467	-0.6005	-2.0072	-1.9198	-1.1214	-0.7318	-1.0135	-0.9049	0.0238	-1.7891	-0.7968	2.1884	1.8925	2.614	0.2083	0.1476	-1.8855	0.0886	-1.3175	0.4147	0.4932	-0.8327	-1.3254	0.3155	-1.8642	-0.2938	0.456	-0.2808	1.1615	-1.0024	-1.2193	-1.3647	0.1323	-0.1701	-0.4809
orf19.4382	RET3	-1.587	0.3267	ND	ND	3.548	0.7802	0.2631	1.4333	-0.7805	-0.5395	-0.5418	0.3034	-1.7956	0.0075	1.4726	1.1593	-0.7335	-0.787	-0.3648	-1.4366	1.098	1.6922	1.9747	1.5731	-2.1838	-1.8916	-1.1226	2.1251	1.9829	2.5695	0.1249	-1.3523	-0.2858	1.271	1.351	0.8501	-0.6992	-1.0802	-1.7771	1.2564	0.4781	-0.6013	-1.4102	-0.7197	-0.7857	0.7729	-1.1417	-2.9134
orf19.538	GPI2	1.2538	-0.747	0.3815	0.6354	-2.2413	0.2781	-1.1895	-2.306	0.3872	-1.2392	-1.9003	0.8946	-0.9842	-1.7033	-1.0755	-1.3089	0.6999	1.2443	1.2993	0.6788	-0.7433	-0.8914	-0.1612	-1.7676	-1.3352	-1.029	0.1061	-1.1686	-1.1202	-1.1567	-0.5524	-1.0034	-1.1676	-0.2151	0.494	-0.4663	0.5335	-1.5398	0.3425	0.1274	-0.9495	-0.4865	1.7229	-1.4422	-0.5339	0.175	-0.786	0.2049
orf19.4502	MOT1	ND	ND	ND	ND	ND	ND	ND	ND	ND	-0.3705	-0.7326	ND	ND	ND	0.0876	-0.9253	-0.7727	-0.9366	-0.9491	-1.2722	ND	ND	0.1368	-0.7072	ND	ND	ND	ND	ND	ND	ND	ND	ND	ND	ND	ND	ND	ND	ND	ND	ND	ND	ND	ND	ND	ND	-0.6264	0.3883
orf19.3031	SEC62	-1.2527	0.0528	0.2081	-0.506	0.9624	0.1714	1.5674	0.6613	-1.4287	0.1677	0.0008	-1.2208	-0.7232	-0.5902	-1.0803	-1.0224	-1.55	-1.034	-0.9831	-1.5618	-0.5774	-0.8303	0.2719	-0.8228	2.0521	1.5031	2.3273	0.2664	0.1708	-0.9544	1.5381	0.5301	-1.7602	1.2277	0.5888	-1.7167	-2.8615	-2.1067	0.169	-0.657	-1.4874	-2.9976	0.7249	-0.8279	1.4977	0.0725	-1.3224	-0.4192
orf19.2775	IDI1	-1.0455	-0.9414	-0.6742	-0.5224	0.6453	0.168	-0.4665	-1.5816	0.5351	0.8598	1.4256	0.8843	0.7791	1.0453	2.3962	1.9763	-0.1175	-1.7729	2.2373	0.8532	-1.1304	-1.3091	0.25	0.4042	0.8181	0.0149	0.6165	-1.2255	-1.4822	-3.4908	0.7549	0.4112	1.4803	1.4637	-2.0922	-0.9308	1.6986	-1.4025	0.3538	1.6627	0.6554	0.5768	0.3746	1.8091	-0.4049	-1.9401	1.2464	2.0987
orf19.5846	TFB2	0.0532	-0.8098	0.0861	-0.3039	0.1883	-1.1117	-0.9735	0.3034	0.1084	-1.0836	-1.9529	-1.3518	-2.6199	0.1568	-0.8491	-1.5964	0.153	0.8311	0.3723	1.8104	-0.1936	0.5558	-0.6695	-1.1376	-1.1401	-0.4225	-1.2161	0.3624	0.0913	0.2282	0.7869	0.5991	0.434	1.403	1.3931	0.3328	0.7189	0.4191	-0.7646	0.5967	-0.5945	0.2038	1.5004	0.4223	0.3512	0.2253	-0.6644	0.5362
orf19.6541	RPL5	0.3256	0.2241	-0.33	0.2787	-0.329	-0.4188	-0.9445	0.0825	-0.2792	0.0008	0.0008	0.4932	-0.8802	-0.6878	-1.8731	-1.1533	-1.4551	-1.6966	-1.5428	-1.5974	-0.4229	-0.6738	-1.1179	-0.8027	-0.1877	-0.6007	0.3626	0.2517	-1.1631	-1.515	0.8019	0.3894	0.0495	-1.47	-0.8105	0.09	-0.8063	-1.5287	-0.9496	-0.9418	-1.3563	-2.1125	-1.1207	-0.2309	0.3119	-0.2343	-0.1951	0.325
orf19.487	SPT14	1.2858	-1.1686	-0.5736	0.1369	0.9808	0.2117	0.6294	0.2497	-0.9222	0.7008	0.3726	0.7157	-0.5561	0.8383	-0.5193	-0.5864	0.1202	1.0383	0.5167	-0.8447	-1.2521	-1.1406	-0.4931	0.9787	0.2476	-1.4064	0.0477	0.3532	0.1218	0.0318	1.2213	0.89	-0.8882	0.8592	-1.7095	-1.8411	1.2205	1.0944	1.2152	0.5145	0.1012	0.6138	1.1545	-0.7547	0.2995	0.19	-1.2265	0.3242
orf19.3478	NIP7	-1.09	0.0436	-0.5194	-0.7956	-1.3672	-0.2054	-0.5835	0.1387	-0.5259	0.0731	-0.46	-0.4766	0.4796	0.6187	-1.9393	-1.6486	-1.7286	-1.01	-0.7866	-2.0788	-0.4663	-1.0871	-1.2926	-1.5682	0.9581	0.4797	0.7869	-0.5879	-0.565	-1.2817	0.1955	0.0691	0.1228	0.7083	0.078	0.4419	-1.44	-1.907	-0.5586	-1.0241	-0.8669	-1.4104	-1.1697	-0.8282	0.1258	-0.4259	-0.6256	-1.3663
orf19.6539	RVB2	0.5036	-0.0375	-2.6063	-2.769	-1.2774	-1.0901	-0.8549	1.121	-0.7351	-0.7989	-0.8168	-0.9057	0.4287	1.7289	0.8114	-0.579	-0.2307	1.1501	0.6633	-0.4344	0.2788	0.8012	-1.5156	-2.363	-1.5745	-1.7861	-1.9994	0.4753	-1.3145	-2.4737	4.1747	6.5529	5.6217	1.1245	1.0588	3.0413	1.4414	0.0653	1.8791	0.0166	0.694	-0.8385	-1.5641	-1.642	-0.6664	-1.2741	-0.7873	-0.4358
orf19.336	YAH1	0.8586	-0.6302	0.3475	0.2878	0.9109	0.1424	0.0033	0.3147	-1.2059	0.6451	0.4155	0.3486	0.1289	0.9669	-0.4978	0.2316	-0.7987	0.1957	0.573	-0.4622	0.7201	0.7063	0.2585	0.0395	-0.5276	-0.562	0.3377	0.9251	0.0264	0.0312	1.37	0.4057	-1.184	-1.1931	0.1923	-0.7238	0.5205	0.4637	-0.9246	0.6102	1.476	0.3453	0.6098	-0.8267	2.1964	-0.4368	0.4029	0.8299
orf19.3761	CDC54	ND	ND	ND	ND	ND	ND	ND	ND	ND	0.0696	0.0679	ND	ND	ND	-1.0269	0.2126	-0.5636	0.3395	-1.9122	-0.6372	ND	ND	0.9377	0.3067	ND	ND	ND	ND	ND	ND	ND	ND	ND	ND	ND	ND	ND	ND	ND	ND	ND	ND	ND	ND	ND	ND	-1.6589	0.4916
orf19.4542	CCL1	0.1753	0.7266	-0.7825	-2.1228	-0.9868	-0.5142	0.0468	1.3222	-0.5956	0.0008	0.2512	-0.1579	-0.7341	1.3468	-1.3272	-0.359	0.9076	-2.0333	-1.177	0.1789	1.4587	0.1591	-0.6826	-1.4728	-1.1088	-0.8498	-2.1592	0.5428	1.0866	0.4045	0.467	1.3774	1.4651	-1.542	-0.8282	-0.9051	-1.5541	-1.2753	-1.1724	0.0114	-0.4853	-2.6983	1.6238	0.8711	-1.1153	1.2415	0.5327	-0.3093
orf19.4051	HTS1	-1.5951	2.163	1.4283	2.2121	-0.3795	2.377	1.109	1.6647	3.0794	-0.8424	-0.3379	1.132	1.5093	0.0744	0.2213	-0.6482	-1.2463	-1.1781	-1.1279	-1.1312	1.5848	1.4142	-0.5127	-0.465	1.2409	1.214	1.3544	-0.3383	2.6727	2.5489	-1.0846	1.6024	2.69	0.619	1.1172	-1.4836	0.4723	1.0659	2.5821	-1.7516	0.2777	1.2235	-0.5062	-1.1933	1.3848	0.2763	0.6514	0.6699
orf19.3027	ARP7	0.4008	0.9297	0.6358	0.3444	-3.4815	-1.373	-0.8025	-0.8838	0.489	0.0007	0.0007	0.1687	-1.8129	2.0795	0.5614	-0.8604	1.0573	0.3349	0.9979	0.0364	-1.0426	-1.1364	-1.1546	-1.4323	-1.6056	-1.9082	-1.9036	-0.737	1.1233	0.942	0.119	0.6284	0.061	-0.9356	-0.7274	-1.0502	0.6735	0.0002	1.2592	-0.7211	-0.5443	0.2359	0.479	0.2818	-0.8842	0.9559	0.9081	2.6356
orf19.3647	SEC8	0.5031	1.1205	1.4127	1.0887	0.8077	0.8684	0.5963	0.8685	0.9262	0.0008	0.0008	0.2218	0.6683	2.2434	2.9634	1.8314	0.3218	-0.8991	-1.2871	-1.599	-0.7984	-1.713	0.9867	0.6558	0.5529	0.2615	-0.7093	-0.2198	0.8066	-0.7185	0.5367	-1.545	1.3671	-0.6711	-0.1829	-0.6742	1.2863	1.1858	0.7161	0.3073	-1.0603	-1.6647	-2.2097	-0.6116	0.7437	0.0445	-0.4986	-2.661
orf19.4194	TFB4	1.4131	1.3467	1.8299	1.7392	0.4685	1.6322	1.6419	2.3188	0.958	0.4467	0.9351	0.5037	2.0368	1.8692	-0.9209	0.6111	0.5007	1.3185	0.3339	1.0053	0.037	0.2145	0.3848	0.6308	0.3107	0.4213	0.1171	1.3944	2.0509	1.8748	1.4866	1.0815	2.693	0.9316	0.3042	0.198	1.021	0.7744	0.5969	0.3531	2.0709	2.4835	0.6869	-1.0322	-0.8631	0.1851	0.8932	1.5705
orf19.1975	DIB1	0.3234	0.8054	1.2736	0.7831	0.4744	0.9335	1.0205	0.3631	0.4887	0.0007	0.0007	1.0623	0.3593	0.6534	0.4375	0.7709	-0.4037	0.0186	-0.3668	0.0253	1.1805	0.6961	-1.2739	-1.0491	0.5334	0.39	1.5648	0.1169	1.039	1.2987	-0.9737	1.5167	0.5239	0.3279	0.384	-0.4802	-1.3442	0.6113	-1.605	0.5622	0.3665	0.9067	0.4466	0.3859	-0.7994	0.4683	0.2069	-0.9375
orf19.2233	PRE2	-0.3597	0.3706	0.5732	0.6101	0.9164	0.81	0.7678	0.6617	-0.3428	0.0011	-1.2556	-0.2469	0.8246	0.651	1.2545	0.0254	-1.6431	-0.4779	-1.4783	-2.7489	-1.7323	-1.9603	0.4595	0.1899	0.5478	-0.3134	0.7618	0.0805	0.0342	-1.2685	0.3359	-0.3537	-0.7575	0.6122	-2.4921	-1.7777	0.3049	-0.3282	0.4238	0.9465	0.6231	0.611	-1.511	-2.0097	0.0415	0.155	0.1052	0.3175
orf19.6881	YTH1	-1.0382	-1.3357	-0.5469	-0.7477	1.4571	-1.4392	-1.7029	-2.4204	-1.0512	-1.1009	-0.9361	-0.6622	0.4855	-1.8684	-0.2638	-0.3129	0.0659	-0.5302	0.2093	-0.3314	-1.111	0.2667	0.0632	-0.8845	-0.242	0.132	0.5827	0.5209	-1.4614	-0.7789	0.4329	0.8895	-1.4317	-1.748	0.6677	-1.3388	0.4273	1.1527	0.366	-0.2419	0.0703	0.1788	-1.5084	-1.4239	0.5652	0.0266	-1.2848	-1.2203
orf19.7286	RPN7	-0.9805	0.0485	0.1931	0.652	1.001	0.7064	-0.2982	-1.3573	-1.6491	0.0008	0.0008	-1.2473	-1.3541	0.7131	0.6368	0.0677	0.4315	1.5183	1.1946	1.9821	1.3279	1.2153	1.181	-0.5714	-1.1589	-0.6676	-1.3118	-0.5642	-0.2273	-1.3345	0.695	1.0238	0.1892	1.1045	1.0674	0.361	0.2177	0.1576	-1.3437	-0.9109	-1.5725	-1.6522	0.0231	1.4528	-0.2578	-1.6113	0.81	-1.7255
orf19.3564	RPC40	ND	ND	ND	ND	ND	ND	ND	ND	ND	0.9873	0.9718	ND	ND	ND	0.0936	-1.2744	0.737	0.562	-1.7198	0.2288	ND	ND	0.4076	-0.17	ND	ND	ND	ND	ND	ND	ND	ND	ND	ND	ND	ND	ND	ND	ND	ND	ND	ND	ND	ND	ND	ND	1.4612	0.8447
orf19.6860	PIS1	0.2342	1.3195	1.3155	1.9534	0.3815	0.0776	0.0616	0.9375	-0.5141	0.0008	0.0745	-1.5164	-0.9885	-1.7188	-1.1883	-1.4018	0.9618	1.1965	1.4167	1.8214	-0.6001	-0.6991	0.2294	-0.8889	-1.6199	-1.2011	-2.2738	1.8092	0.673	1.3716	0.3355	1.0236	0.2997	-3.1605	0.512	0.62	0.4745	1.0177	0.6724	1.0399	0.1007	-0.3574	-1.7362	-0.7795	-0.1312	-1.5243	-0.893	0.8917
orf19.7563	BET2	-0.9945	0.9323	1.7314	1.7696	-0.2005	1.6791	0.8016	0.2021	1.1001	0.1393	-0.6192	-0.9711	-1.0708	-1.1035	0.7446	1.3863	1.7014	2.3973	2.0186	1.3738	1.6921	1.7221	2.9528	2.2546	-0.3731	-0.728	-2.1493	1.0487	2.5287	1.8455	0.536	1.7221	-2.1349	1.6378	0.8433	0.8722	0.0758	0.4789	-0.4489	0.9419	2.2013	0.6777	0.4672	0.1303	0.5075	0.8091	0.0496	0.0521
orf19.2835	AOS1	1.1783	-0.3216	0.7893	1.2643	0.688	-1.1361	-0.2778	0.0444	-0.2533	0.4801	-1.8115	-1.9535	-0.5459	0.8732	-0.733	-1.5431	1.3192	-1.256	0.9722	1.9599	0.0574	0.2331	-0.5642	-0.6401	0.6215	-0.4434	0.3035	0.0667	-0.8147	0.0125	0.1032	-1.1965	-1.0491	-2.1762	-1.54	-1.6716	1.6545	1.7535	-0.6134	1.3546	1.2655	0.9643	1.4599	0.0273	-1.2498	-0.8224	0.9392	0.2931
orf19.5073		-1.1462	-0.9418	-0.9272	-0.6516	0.4289	0.6258	-1.0178	-0.8458	0.4029	-1.0549	0.4587	0.181	-0.658	0.2529	0.9447	1.4992	1.3179	1.5152	2.0643	1.1091	-0.1639	0.6646	0.196	0.2985	-0.8655	-1.0738	0.5344	-0.8232	-1.1675	-1.8729	1.0754	1.3337	0.4069	1.4596	-0.3862	0.1568	-2.0743	-0.2975	-0.9285	-0.6966	-0.2966	-0.4947	-1.032	1.3281	0.3031	0.419	-0.7505	0.8536
orf19.4125	PZF1	-1.2562	-1.6637	-0.7138	-0.335	0.8698	-0.6155	-0.8566	0.0473	-0.4686	-0.6044	-0.6648	0.1156	0.143	0.5644	-2.1823	-1.7459	-1.3228	0.1409	-0.8137	-0.8094	0.0029	0.2178	-1.166	-1.3277	-0.4293	-0.3521	1.0325	-1.2434	-0.8781	-0.947	1.4717	1.8461	0.6024	1.1333	-0.8055	-0.9848	-1.6181	-2.2637	-1.0006	-1.3757	-1.3161	-0.8252	0.7701	0.4678	-0.5302	-0.8054	-0.7076	-0.4753
orf19.2643	RPO26	0.0419	-0.6846	-1.938	-2.2067	-1.129	0.0131	-0.6367	0.7652	-0.3382	0.6526	0.7062	0.5057	-0.892	0.3529	-1.9371	-1.3448	-1.2429	-1.0421	-1.2263	-1.1425	0.7631	0.6203	-0.9606	0.4202	2.5875	1.7823	2.4544	-1.5031	-0.4849	-1.2103	0.6606	0.789	0.8709	1.0008	-1.1258	-2.6224	-3.0042	-1.7301	-2.4389	-1.048	2.4862	0.9028	1.2118	1.4053	-0.3104	1.5474	0.916	-0.2158
orf19.3334	RPS2	1.9506	2.1241	2.3878	1.6753	0.8175	2.8507	2.235	0.6081	0.6398	0.8871	0.8278	1.2372	-0.2862	2.4037	1.8249	1.3628	1.5615	-0.3161	1.1684	2.2251	-0.8036	-1.094	0.3117	1.2066	0.294	0.4562	-0.5524	1.9142	1.0035	1.3021	-0.6003	0.2366	2.2701	-0.7695	-1.0744	1.1692	2.5531	-0.4176	0.2408	0.7417	2.2698	2.9148	-1.9544	-0.4736	-0.7479	0.693	0.4512	0.49
orf19.3426	HYP2	ND	ND	ND	ND	ND	ND	ND	ND	ND	0.4884	1.1338	ND	ND	ND	-0.2051	0.8183	1.6368	2.1974	3.0638	1.7761	ND	ND	1.1212	1.9115	ND	ND	ND	ND	ND	ND	ND	ND	ND	ND	ND	ND	ND	ND	ND	ND	ND	ND	ND	ND	ND	ND	0.7611	0.702
orf19.2672	NCP1	13.0867	9.2591	5.3107	4.5134	9.5088	5.6735	5.2769	6.1452	8.2859	0.2175	-0.7618	-1.0108	-0.8411	0.9894	0.4252	-0.3785	0.7758	0.7247	1.3035	0.1569	0.0232	0.4579	0.0029	-1.2435	1.8898	1.4326	1.7929	0.0507	0.3234	1.0431	0.8402	0.7052	1.1287	0.3928	0.8367	-1.6733	-0.5441	-0.4519	-0.7373	1.064	0.387	0.6019	-1.6904	0.6741	0.458	-0.9555	-1.3207	0.7465
orf19.6151	ARC15	ND	ND	ND	ND	ND	ND	ND	ND	ND	0.0008	0.0008	ND	ND	ND	-1.1608	0.157	0.4232	0.5997	0.7962	0.5474	ND	ND	1.008	1.1427	ND	ND	ND	ND	ND	ND	ND	ND	ND	ND	ND	ND	ND	ND	ND	ND	ND	ND	ND	ND	ND	ND	6.0604	4.0862
orf19.5887	NUP85	-2.7535	0.116	-0.439	-1.971	-1.4457	1.1487	0.7405	1.5387	-0.96	0.0008	0.0008	-1.2077	-1.2788	2.8981	0.4055	-0.8796	1.2743	1.5157	0.2668	-1.278	0.068	0.4411	-1.4765	-0.8335	-0.9345	0.5036	-1.3417	-0.9397	-1.1037	-0.8867	1.5344	2.5137	1.188	1.1503	0.2002	1.1258	1.2931	1.2795	-1.0261	0.6257	0.0888	0.0996	-1.0991	0.5489	1.0936	2.0721	1.0965	0.7787
orf19.2287	RPA12	-0.5938	-0.9397	-0.5441	-0.5455	0.8463	-0.7042	-0.7698	-1.5425	-0.9542	0.1119	-0.5134	0.3859	0.7533	-1.2318	-1.4449	-1.9831	0.2297	0.1179	-0.6702	0.3875	-0.8965	-0.7345	0.01	-0.9069	1.9929	2.1853	1.6945	-1.1955	0.2122	-0.6251	0.4182	0.6984	-0.7887	0.6505	1.0122	1.0296	-0.8013	-0.8145	0.1009	-0.4758	0.3883	1.0834	0.6043	0.5521	1.0152	-0.7485	0.0203	0.0337
orf19.5691	CDC11	-0.8316	0.388	-0.8036	-1.3675	-1.3258	0.254	0.3173	0.4954	-0.4377	0.4749	-0.3711	0.4618	0.7858	0.4852	-0.0968	1.4686	0.5683	2.368	2.4225	1.8971	2.3445	2.2255	1.5483	2.0657	0.6487	-0.6409	-2.0624	-0.3835	-0.5494	0.38	-1.2564	0.613	0.9209	ND	1.43	-0.7064	2.0877	-0.7086	-0.6635	-0.791	-0.3272	-0.6974	0.3804	1.1601	-1.8893	0.6279	1.3033	-0.317
orf19.3251	ARC19	0.0439	0.531	-0.2708	0.4766	0.7114	0.04	0.6811	1.6273	0.1787	0.5276	0.5203	-0.4443	0.0838	-1.3987	-2.5014	-1.824	1.8386	2.2479	2.0056	3.1522	1.8304	0.1199	-1.2196	0.5396	-0.1496	0.1785	0.0107	-1.1954	0.0924	-2.2374	1.1225	0.1276	1.0223	0.8511	1.0151	2.2266	-0.6422	-0.9315	0.0529	-1.2493	0.3296	0.9145	0.0856	3.1935	-0.6716	1.7	19.4706	11.9423
orf19.4640	PWP1	0.0955	-1.4945	-1.0003	-0.6036	1.1504	0.549	0.7674	-1.8113	1.2161	0.8177	1.1238	2.3451	1.6868	0.7272	0.448	-0.5038	-0.3023	0.1116	0.5537	-0.2158	0.0569	-0.7722	0.2807	1.264	0.067	0.1401	1.1039	0.0979	0.3288	-1.9614	2.4697	-0.9073	1.2901	1.2579	-1.9575	1.3931	0.5997	-1.2737	-0.2077	-1.0714	-0.3583	-2.043	0.1603	0.8378	1.5799	0.6983	0.1448	2.5801
orf19.1883	YCS4	-0.911	-1.3491	-1.4335	-1.0516	0.493	-1.0813	-0.6401	-0.9518	0.0523	1.9258	0.7765	-1.3606	-0.3895	-1.8165	0.9901	0.931	2.0959	1.1513	0.3204	0.8024	-2.4797	-1.2708	1.3869	0.6701	-2.3625	-1.1995	-0.7787	0.1175	0.1623	-1.3487	0.3438	-1.4272	-0.6671	0.6129	0.6323	-0.4103	-0.8574	0.3184	0.236	-0.651	0.3439	0.3286	-0.6326	1.6768	-0.9361	-0.5665	-0.6386	-0.2022
orf19.2557	SEC65	-0.2386	0.1381	0.7545	0.5349	0.3796	-0.0568	-0.3805	-0.5334	0.4886	-1.1478	-0.9233	-0.5544	0.4894	0.1176	-0.4743	-0.5863	0.8873	0.6881	0.5763	1.26	1.2285	0.8348	-0.9641	-0.8262	-0.495	-0.5097	-0.355	0.3962	0.3522	-0.1937	0.4762	0.8192	-0.3245	0.8269	-0.7864	0.4104	-1.0168	-1.8685	0.0292	-1.2684	-0.7291	-0.5215	0.7284	1.0472	0.2881	-0.1144	0.6325	-1.048
orf19.4909	CBK1	-1.1652	-1.0776	-0.4846	0.0196	1.6059	-0.7183	-0.482	0.1122	-0.6834	0.3597	0.0523	-0.7153	-1.1323	0.0874	0.4579	0.2074	0.8347	0.0914	-1.7232	0.2058	0.2307	0.3633	-0.8265	-0.3279	0.0857	-0.4359	0.2008	0.5991	0.2293	-1.8046	1.0641	0.8151	1.1812	1.2784	1.306	-1.9929	-0.2368	-1.2538	-0.3029	-3.1896	-0.5699	-0.5555	-1.055	0.4993	1.2892	0.7251	-1.0789	-0.7887
orf19.2437	ARC35	-1.0696	-0.8111	-1.0815	-0.4322	1.9989	0.0285	-0.1348	-1.0993	-1.2957	0.8596	1.1592	0.596	-0.7278	-0.6133	-2.0313	-1.7194	0.7698	1.5064	-0.7107	0.7207	-0.866	-1.3688	-0.6964	-0.1971	-0.6086	-0.9386	-0.5601	-1.2502	-2.3256	-2.846	0.7666	1.3354	0.6791	0.2592	1.5027	0.454	-1.3549	0.0434	-0.5932	-1.2958	0.2824	0.5194	-0.4469	0.4269	0.4829	0.0559	7.7111	3.3246
orf19.3243	SRP54	-0.3964	0.3824	0.8575	1.3357	-0.8816	0.69	1.0136	0.9756	-0.417	1.4332	1.9004	1.7847	0.9256	0.5561	0.2906	0.4919	0.9987	0.0212	-0.9672	1.8209	-1.0759	0.0328	-0.5452	0.296	0.0106	-0.6013	-0.7753	0.5481	2.3161	0.9179	0.3817	0.2684	1.2232	-0.7425	-0.2306	0.2941	0.3094	0.2584	1.266	-1.0222	0.2361	0.3867	0.5214	-0.7377	0.1832	-1.1402	-0.1221	1.0033
orf19.5825	NCB2	2.3947	0.0103	0.2193	1.5881	1.3453	-2.1353	0.2426	-1.9788	-0.6739	0.7413	1.3235	1.0282	1.7502	0.6877	-1.0267	0.0508	0.7349	0.9011	-0.3738	0.5866	-0.9495	-1.9261	-1.0871	0.0274	0.0357	2.1157	0.6759	ND	2.1173	-3.2349	0.5461	1.0913	0.9238	-0.5104	1.8327	-1.0257	1.7235	0.254	0.9269	ND	0.8468	0.3535	-2.2399	0.515	1.4829	-2.0643	1.9801	0.4754
orf19.5513	PRP45	0.2893	-0.716	0.4093	0.6413	1.1057	0.7936	0.6922	1.6104	0.1665	0.9664	1.1472	1.3462	0.846	1.2545	1.6731	0.6859	0.4511	0.4018	0.0545	-1.2685	0.2233	0.5349	0.9267	0.6097	-0.8424	-0.6007	0.2396	1.2765	1.0642	0.0966	1.8632	1.2681	0.7641	0.7736	0.2955	-0.8385	1.8438	0.1888	0.2956	0.5243	1.0563	1.0308	0.0892	-0.9096	0.7884	0.0206	-0.6384	2.1052
orf19.5358	ORC2	0.777	0.2082	-0.44	0.5561	-1.4937	0.6561	-1.935	-1.5814	0.2914	0.8481	0.9243	-0.3833	0.2351	0.1108	0.4034	0.1478	1.7509	0.5359	-0.7604	-1.0827	0.0239	-1.6864	0.1782	-0.9795	-1.1571	-0.9131	0.1134	ND	ND	-2.4427	ND	-0.352	0.536	ND	-1.0382	0.2612	-1.1527	0.3231	0.7096	ND	-0.3307	-0.394	0.1193	-0.4899	0.6356	0.0926	1.7298	-0.3483
orf19.6340	RPB5	ND	ND	ND	ND	ND	ND	ND	ND	ND	1.3863	0.5806	ND	ND	ND	-1.5208	-3.6302	-2.375	-3.7627	-2.981	-3.6606	ND	ND	0.0723	-0.5038	ND	ND	ND	ND	ND	ND	ND	ND	ND	ND	ND	ND	ND	ND	ND	ND	ND	ND	ND	ND	ND	ND	0.6602	0.6209
orf19.7293		-1.7765	0.3744	0.3295	ND	0.8049	0.2221	-1.4247	-1.379	-2.7877	0.2519	0.209	0.7947	-0.9197	2.4274	0.2585	-0.3904	0.5696	0.5896	0.9476	1.6583	0.27	0.5569	-1.7211	-1.5443	0.7043	1.9411	1.1103	-1.2567	1.1424	-0.7133	0.8364	1.9617	1.2819	0.3925	-0.8439	-3.2547	ND	-1.0908	0.7439	1.1518	2.9112	3.272	1.7138	-0.9698	0.5646	0.4799	0.6197	1.8175
orf19.1085	UBC1	0.2975	0.5859	0.2068	0.2521	0.1541	1.9832	0.6645	0.0339	0.5605	0.2102	0.4685	1.0454	-0.4047	1.2054	-1.448	0.7185	1.3567	1.65	2.8235	1.5243	0.107	-1.205	0.1174	1.7315	-0.71	-0.4175	-1.8275	0.7124	0.3831	-0.6436	-0.3767	0.5917	0.4143	-0.9539	0.1962	0.5837	0.3729	0.0704	0.4325	0.4745	-0.1428	-1.6839	-1.1829	1.8833	1.2952	1.723	-0.9675	0.3896
orf19.4374	PRP42	-1.302	-0.4181	-1.1512	-0.9084	0.5081	0.3482	-0.314	-1.7127	0.4901	0.3434	-0.5888	-0.5927	-0.6992	1.0846	-1.1239	0.1178	0.3085	0.6926	-0.2868	-0.8224	-1.7471	-0.7299	0.675	0.486	-1.5576	-2.1408	-2.0862	ND	1.0805	-3.8622	1.3021	1.4744	0.4333	1.4972	-0.9737	-0.209	-0.8699	-0.793	0.1567	ND	-1.2823	-1.7709	-1.7891	0.2058	-1.6021	-1.2555	1.0618	0.1117
orf19.4293	YDR267C	-0.68	-0.0699	0.0043	0.2372	1.5707	1.6316	0	0.0904	1.505	0.3512	1.3235	0.3465	1.3747	1.5061	0.1743	0.1593	0.074	1.1113	-0.4609	0.7231	0.1272	0.7336	0.1263	0.857	0.8195	-0.643	0.5581	ND	-1.533	ND	0.6837	-0.8685	0.169	-1.2206	0.393	1.2846	-0.7991	-0.9622	0.4294	ND	-0.9132	0.08	0.0646	0.8554	0.6019	-0.9192	0.3545	1.0044
orf19.567	TFB3	ND	ND	ND	ND	ND	ND	ND	ND	ND	1.6244	1.1245	ND	ND	ND	0.5509	1.2416	1.2772	0.1836	1.4299	0.809	ND	ND	1.2019	0.4078	ND	ND	ND	ND	ND	ND	ND	ND	ND	ND	ND	ND	ND	ND	ND	ND	ND	ND	ND	ND	ND	ND	0.4318	2.253
orf19.670	SMT3	-0.6833	-1.6046	0.058	0.973	0.4701	-0.5931	-0.6536	0.1925	0.1247	-1.3385	-1.2119	1.4552	-0.6348	1.0284	-0.6852	-1.391	0.9315	1.6819	0.3638	0.5078	1.0268	0.4182	0.6992	-0.4553	0.2903	0.5541	0.3107	1.0727	0.0597	0.5989	-1.2353	1.4536	0.3449	0.6131	0.4736	1.4978	-1.0105	-1.1404	-2.5749	-0.8639	-0.3929	0.5078	-0.5034	2.0743	1.4821	1.0572	-1.0181	-0.1932
orf19.1901	MCM3	-1.0357	-0.9118	-0.7939	0.2637	0.4143	-0.873	-0.2958	0.6241	-0.2608	0.0007	0.0007	0.3585	0.3636	0.2865	-1.3411	-0.9148	0.7956	0.4415	0.7795	-0.3998	-0.4697	-0.3312	0.7387	0.6151	0.6873	-0.5829	1.8239	-1.8778	0.0347	0.0745	0.7398	0.7371	0.5413	-1.3809	0.9914	1.3456	-1.3716	0.2585	0.0199	-1.4272	-1.5158	-1.1409	1.5418	1.4481	1.4811	0.4421	-1.164	-0.3321
orf19.4033	PRP22	-0.5543	0.1739	1.1123	0.5603	-1.6481	-0.6972	-0.6717	-0.8204	0.7759	0.2839	0.8995	0.4214	2.2068	-0.9364	-0.9595	-0.5169	-0.5865	0.7794	-0.373	0.8578	0.3335	0.4536	0.3879	-0.3725	0.0399	-0.4328	-0.2722	0.1492	0.2698	0.3442	0.3097	0.2965	0.9733	0.8172	0.8218	0.3296	-1.7891	-1.49	-1.6275	-1.3558	-0.9254	-0.2887	-0.937	2.0544	0.1816	1.4543	1.1481	0.0465
orf19.1267.1	YER048W-A	ND	ND	ND	ND	ND	ND	ND	ND	ND	0.0008	0.0008	ND	ND	ND	0.5493	0.6009	0.1119	1.4757	0.2482	1.073	ND	ND	-0.9032	-0.7018	ND	ND	ND	ND	ND	ND	ND	ND	ND	ND	ND	ND	ND	ND	ND	ND	ND	ND	ND	ND	ND	ND	-0.1388	-0.3982
orf19.7256	LSM5	2.8764	0.6486	0.8655	1.0592	-2.3972	1.7877	2.1821	1.9757	0.5045	0.7731	0.7823	2.4034	1.3328	0.2153	-0.6502	0.7716	0.3315	0.3553	-0.6962	0.3658	0.2972	0.3213	-0.4814	0.082	0.4901	0.5754	0.5606	0.5882	0.0484	0.7108	0.6994	0.1758	0.892	0.409	-0.1806	-1.3495	-0.8959	-1.8759	0.5059	-2.2243	0.1326	0.6218	-0.6424	-1.0576	-0.551	0.8187	0.618	0.5203
orf19.3098	BRR2	0.1457	0.4579	-1.0382	-1.2819	-2.3926	-0.4172	-0.7237	0.0905	0.1086	-1.0244	-1.128	0.6492	-1.4299	0.723	-0.3004	-0.6064	-0.643	-0.1876	0.0358	-0.2558	0.1295	0.3152	-1.4241	-1.003	-1.16	-1.6775	-3.0867	-0.5861	-0.5592	-1.5134	0.6718	2.4193	1.5436	0.842	0.0883	0.6998	0.2406	0.5055	-0.1958	-0.5563	-1.3372	-2.0535	-1.2236	-1.7175	0.3279	0.6535	1.7453	0.4684
orf19.2559	CDC4	ND	ND	ND	ND	ND	ND	ND	ND	ND	0.7729	1.1267	ND	ND	ND	0.2895	1.1692	1.3727	1.5729	1.248	0.1705	ND	ND	-0.198	0.6279	ND	ND	ND	ND	ND	ND	ND	ND	ND	ND	ND	ND	ND	ND	ND	ND	ND	ND	ND	ND	ND	ND	-0.5374	0.5193
orf19.7265	SAD1	1.1031	1.0917	0.656	0.0154	ND	1.4368	1.7718	0.5474	0.3649	0.9753	1.759	0.7972	0.6069	0.6472	0.0373	0.2705	0.4556	0.2627	0.4241	0.4995	0.9651	-0.692	-0.204	0.8744	0.5235	0.9134	1.8974	1.1776	2.0612	0.7717	0.8997	1.3417	0.55	-0.6299	1.2586	-0.7642	-0.3011	1.1155	0.7968	-0.8347	0.5272	0.5261	-1.272	-0.7156	0.641	0.2398	1.0916	0.7262
orf19.3623	SMC2	0.3594	-1.0786	0.4203	0.9546	2.3516	-0.9967	-0.4848	0.5121	0.2035	-1.704	-1.4416	-0.3553	1.7662	1.0085	1.1712	0.1537	1.3654	1.5472	-0.8256	-0.9135	0.269	0.8775	0.2878	-0.3675	-1.8943	-1.103	-0.948	-0.8627	-1.6668	0.1507	0.7365	0.8234	-0.5959	-0.9698	1.5444	1.6109	1.6885	0.9238	0.3769	0.3903	0.5541	0.2053	0.2498	-0.7983	-0.7163	0.8963	-1.1031	0.5736
orf19.1221	ALG2	0.8418	0.6773	0.5201	0.9954	0.8646	1.1191	1.6649	0.5785	0.6895	1.5005	1.0268	2.1311	1.7416	0.1007	0.8412	0.2065	-1.1398	-2.1374	-2.235	0.0782	0.1234	-1.5046	1.0956	1.3028	1.9264	1.8072	1.2887	-0.7357	0.2481	0.4999	0.0772	0.2933	1.5347	-2.5311	1.4188	1.3015	1.0033	1.3131	-2.4619	1.0268	1.6817	2.4968	-0.467	2.0603	1.1723	1.2201	0.2742	1.5434
orf19.4775		-1.603	-0.9743	-0.2221	0.0188	0.335	-1.2899	-1.1236	-1.8333	-0.6587	-1.4045	-1.7525	-0.6003	-0.9119	0.596	0.3616	-0.5975	0.1343	1.091	0.4839	-0.5968	-0.4182	0.6399	-0.5415	-0.6614	-1.1926	-1.0368	0.8394	-0.4697	0.028	-0.5114	1.3941	1.548	0.0371	0.5319	-2.0296	-0.5093	0.3769	0.2315	0.1781	-0.6462	-1.1878	0.0105	1.2319	-1.1004	0.0481	-1.7098	-0.6171	-1.333
orf19.747	NBP35	-1.0963	-0.206	0.2963	0.2814	0.0139	-1.7149	0.5907	0.4766	1.0265	0.6043	0.3439	1.905	1.1292	0.7768	0.8464	-0.3941	0.0238	0.1628	-1.915	0.7525	0.334	1.3461	-1.0537	-0.5463	0.3035	0.0098	0.8411	0.823	-0.7303	1.3654	0.8825	0.9241	1.4098	0.3044	-1.1025	0.945	ND	ND	ND	-0.9931	-1.5462	-0.1615	-0.0568	0.4534	1.1593	1.1358	-0.7466	0.4662
orf19.2425.2	RPL28	1.1295	0.2925	0.1971	0.8226	1.3784	-1.6396	0.0532	-1.6323	0.9874	0.0007	0.2637	0.1021	0.1334	0.768	0.0525	-0.9719	1.1031	0.1424	0.1898	-1.1745	-0.9883	-1.0301	-0.8567	0.0412	-0.8643	0.7563	0.9657	0.2107	0.6694	0.7028	2.2727	1.0046	0.6061	0.1563	-0.4321	0.5207	-1.6385	-2.1179	3.6039	0.5638	-0.7806	0.0145	-1.1876	-0.4914	0.5975	-0.5281	-1.2361	0.1012
orf19.122	CDC20	-0.1867	0.2333	-0.5719	-0.6503	0.3458	0.4221	1.3341	0.8447	0.1689	0.2698	-0.76	0.5639	-0.0758	0.3039	-0.9232	0.8136	1.4258	1.8485	0.4935	1.7128	2.0801	1.4442	1.3345	1.7475	-0.0756	-0.4855	-1.1871	-1.4847	0.4225	0.0338	0.3114	-0.8353	-0.1655	-0.8319	-0.756	1.3221	-1.2518	-1.5086	-0.4335	-1.4761	-1.3062	-1.3537	-0.2442	0.9164	1.0844	0.8025	0.9917	-2.0914
orf19.2611	MCM6	0.2285	0.7811	0.7048	0.5252	0.1425	-0.3935	-1.0863	0.2488	0.2879	-1.6494	-1.3049	-1.2602	0.1	0.2132	-0.6119	-0.9176	2.2001	2.1362	2.0332	1.9329	-1.1933	0.2783	-0.4068	-1.1182	-0.8559	-1.7565	-1.9203	0.9812	1.5302	2.0025	-1.8796	2.7241	2.4944	0.3721	0.0811	2.794	0.6357	0.6667	1.5209	0.7424	1.3197	0.7452	1.6314	-0.6619	0.1487	-1.4997	0.8459	0.3529
orf19.7057	GUS1	-1.1911	0.0719	0.612	0.7284	-1.3005	0.2065	0.291	0.9442	2.0816	0.178	0.0008	0.0261	0.0639	-0.8264	-1.5049	-0.355	0.0939	0.0905	1.227	-0.2802	0.5718	0.2705	-1.9163	-1.0432	0.2754	0.0209	0.4227	-0.9605	0.3098	0.2174	0.467	0.2371	1.2102	-0.8664	-0.8025	0.4388	-1.2974	-2.8165	-2.4387	-1.5596	-0.3584	0.3422	0.454	1.2031	-1.6803	1.743	0.5583	0.438
orf19.7441	BRR6	-1.3447	0.814	0.8105	1.0027	0.1487	0.9335	0.6237	2.6532	0.1232	0.2496	0.1667	-0.9963	1.7127	0.8172	-0.7522	-0.1892	1.3443	1.292	-0.6742	2.4663	1.1398	0.8588	-1.3052	-1.5531	0.7167	1.3251	0.8156	1.0547	0.5097	1.8303	0.1463	1.1969	1.7308	1.3199	0.6097	1.3858	0.9728	1.1178	1.121	1.2964	1.1371	1.0561	1.2884	0.0481	-1.0248	-0.9187	0.5086	1.634
orf19.274	TFC4	-0.848	-0.7725	-1.7875	-1.9132	0.7371	0.021	-1.3958	-0.7973	1.0269	0.2178	1.1438	-0.5926	-1.8011	-0.7863	1.7229	-0.2515	0.1545	0.7894	0.2096	-1.1252	-2.0255	-1.5574	1.9259	0.3563	0.4749	0.4016	0.3404	0.0699	0.1876	0.1301	0.2563	-2.0867	0.0873	-0.3463	-0.193	0.0812	0.1895	0.8956	0.2979	0.2704	-1.407	-2.7236	0.2135	0.5956	0.1845	-0.7023	-1.2763	-0.4803
orf19.7673	SMD1	0.6198	0.9522	1.715	1.7143	-1.4054	1.1625	1.0714	0.062	1.5989	2.5124	1.3868	2.3498	3.102	2.0207	-1.1012	1.6508	2.11	0.2203	1.253	1.5457	0.1118	0.0077	0.0248	-0.3294	0.9225	0.2616	0.4095	1.789	1.093	0.9976	0.7952	2.541	3.4574	-1.0931	0.1691	-3.075	1.0364	0.5181	2.4323	0.1053	-0.957	1.9395	-1.1576	-0.8926	0.0872	1.1837	1.0244	0.6376
orf19.6776	GCD2	-0.5198	-0.2524	-1.8888	-2.481	-1.1921	-1.0096	-0.8876	0.3208	1.0824	-0.4043	-0.6203	0.811	0.153	1.3067	-0.1457	0.715	2.2523	0.9605	1.5714	0.7718	0.0972	0.1434	-1.0491	-0.0508	-0.8385	-2.135	-2.2161	-0.4474	-1.8413	-2.2359	0.3552	0.2854	0.7852	0.0838	0.0779	-0.6818	-0.7444	-1.3256	0.606	-0.5278	-1.7478	-2.9188	-1.2655	0.9744	-0.6224	0.573	0.1532	-1.2674
orf19.5436	UTP8	0.4025	1.352	1.9642	1.0205	0.2394	1.5284	0.689	0.2347	1.6079	0.2675	0.3775	0.9949	1.3158	-1.1659	0.1339	-0.9424	-1.634	0.5212	-1.3207	-0.5964	0.2502	0.1074	0.0096	-0.5353	1.8885	1.7462	1.0929	0.3206	0.566	0.0773	-3.1399	0.755	0.6261	-1.1742	1.5074	-1.0508	0.7006	0.1451	-0.3133	1.4084	1.7852	2.3388	-0.3009	-0.276	0.2412	-0.4222	0.734	0.8238
orf19.1460	QNS1	0.0158	-0.5786	1.1116	0.6896	0.909	1.6597	0.4337	0.5555	0.2153	0.5647	1.0394	0.6766	0.1801	0.3627	0.7271	0.2437	1.0979	0.0915	1.8516	1.8602	-1.3035	-1.0404	1.9924	0.4055	0.0986	0.6071	0.2299	0.151	1.3331	0.7888	0.5582	0.3375	0.4326	1.2096	-2.0391	1.2909	1.2056	-1.4464	-1.1456	1.1522	1.5914	1.7568	-1.9451	1.6143	0.7399	1.1357	2.0678	0.7159
orf19.3013	CDC12	-0.7078	-1.5883	-0.3836	-0.4563	-0.1713	-0.5459	-0.6145	-1.7656	-0.7473	-1.119	-0.8489	-1.4222	0.0423	0.832	0.9254	3.6851	0.5055	0.5565	1.125	0.5993	0.0484	-0.4637	1.0731	-1.0828	0.0388	-0.6767	-0.5122	0.6159	0.1058	-0.2546	1.1303	1.3282	-0.3661	0.5058	0.3364	0.0813	0.7572	0.6353	-0.2279	-0.8679	0.1882	0.5949	-0.9225	-1.0706	1.4487	-1.3863	-0.3771	1.2814
orf19.239	STH1	0.4303	0.5807	-1.1921	-1.8466	-1.3772	-1.5881	-2.2323	-1.0363	-0.4496	-1.3142	-1.3282	-1.0512	0.03	0.8549	3.8985	4.0143	3.1779	2.1764	1.2297	2.0018	1.3245	1.3474	1.0575	1.2402	-1.381	-2.2214	-2.6328	0.7719	1.1026	1.629	1.8162	1.6766	0.6945	0.1495	0.3883	0.5015	-0.6949	-0.7731	-0.672	-1.7555	-1.1004	-1.6671	0.6093	2.7464	1.1242	-1.081	0.5697	1.2547
orf19.886	PAN1	0.1256	-1.4607	-0.6927	-0.5548	-1.0914	-1.3294	-0.8062	-2.1198	-1.3613	0.4165	-0.7672	-1.283	-1.5196	-0.5256	-0.7364	-0.693	1.2487	0.7083	-0.3474	-1.0663	-0.9304	-1.1382	0.4516	-1.582	-0.964	-1.0876	-0.3554	-0.3775	-1.9797	-1.2227	-0.5733	-0.7398	-0.7552	0.9898	0.3522	-0.6033	0.5689	0.7913	-0.3497	0.1945	-0.8593	0.6453	-0.5288	-1.0135	-0.5248	0.668	-0.8907	ND
orf19.4479	YJL010C	ND	ND	ND	ND	ND	ND	ND	ND	ND	0.0007	0.0007	ND	ND	ND	0.0704	-0.5117	0.3834	0.8413	0.0151	1.6497	ND	ND	0.0041	0.1604	ND	ND	ND	ND	ND	ND	ND	ND	ND	ND	ND	ND	ND	ND	ND	ND	ND	ND	ND	ND	ND	ND	0.2678	0.1763
orf19.3990	RPC17	-0.476	1.6726	1.0851	0.7841	-0.7622	1.2465	1.1063	0.5748	2.3043	-0.8088	-1.3346	0.8924	0.3997	-1.9986	-1.1011	0.1681	-0.7185	-0.3317	0.2851	-0.4274	0.7164	-0.1016	-0.5628	0.0876	-1.0316	-0.174	-0.1865	1.5268	0.4565	0.0808	0.7391	1.2178	1.3463	1.5166	0.627	-1.3333	2.4284	1.6251	1.855	1.0904	-0.7662	-0.2091	1.1927	-1.1484	0.7749	-0.6715	0.1271	0.2441
orf19.5801	RNR2	ND	ND	ND	ND	ND	ND	ND	ND	ND	-0.7006	-0.5675	ND	ND	ND	-0.5753	-1.6378	-0.6583	-0.325	-1.9807	-1.5715	ND	ND	1.857	2.1327	ND	ND	ND	ND	ND	ND	ND	ND	ND	ND	ND	ND	ND	ND	ND	ND	ND	ND	ND	ND	ND	ND	0.4729	1.1418
orf19.7511	NUP192	-0.5013	0.8506	1.2375	0.6324	-2.4172	0.7222	0.7879	0.5677	0.184	0.0008	0.0008	0.1255	0.9835	-2.414	-2.6238	-2.3915	-1.048	-0.5545	0.7016	0.5037	-1.2639	-1.3252	-0.8806	-1.1846	0.4603	0.486	0.0244	0.595	1.0763	1.4791	-0.942	-2.0357	-1.6695	-2.1008	1.6368	-0.8027	0.3351	1.723	0.5717	0.5955	0.5996	0.167	1.6197	-0.6988	1.041	0.6156	0.522	0.2791
orf19.900	NSP1	1.2295	0.7861	1.0891	2.0186	0.9514	-1.1117	0.5426	0.917	0.7354	0.7367	0.4019	0.4129	-0.7415	-0.4552	0.1767	-0.9451	0.3253	-0.3947	-0.8742	-0.3451	-0.8548	0.2709	1.3155	-0.3542	-0.6801	-1.2631	-0.3665	1.0013	-0.8023	0.0885	0.2117	0.5443	-1.4718	1.3444	0.6331	-0.9188	1.0823	1.484	1.3733	1.6866	1.8044	1.5643	-1.2666	-1.8733	-0.6454	0.9489	-0.6439	0.6791
orf19.1896	SSC1	-0.8902	-0.3737	-2.4133	-3.0382	-0.5139	-1.9979	-1.1025	-1.6963	0.4683	0.3161	0.1714	-1.2728	-1.8248	-1.5385	0.2621	-0.4437	0.4087	-0.7142	0.1057	-0.3562	-1.771	-1.0846	0.5322	-0.7241	-0.6258	-0.5351	-0.3712	-1.4575	-1.1202	-1.413	0.63	-1.3631	-2.1612	1.6622	1.5158	-0.7159	0.404	1.3942	0.0652	0.7463	-1.2904	-1.4539	-1.0622	0.9611	-0.6395	0.0168	-0.5685	-0.7653
orf19.3234.1	SFT1	0.1794	0.4773	0.5681	0.2396	-0.3347	1.018	0.9575	1.8192	1.1439	1.6665	0.592	-0.6228	0.2906	0.0538	0.4516	0.0884	0.98	0.7133	0.9337	0.5368	-0.3873	-1.0255	0.037	-0.1523	0.1396	-0.4552	-0.3985	-0.8404	0.6104	0.5376	-1.0235	-1.1006	1.0186	0.8411	1.0417	-1.5463	0.3046	0.2943	0.4046	0.0734	0.3155	0.6258	-0.7955	0.8528	-0.6339	1.7004	0.7545	1.1041
orf19.6163	CSE4	0.4031	1.5784	2.1073	1.8081	-1.1976	0.5522	1.628	1.1411	1.7043	0.2624	1.0541	1.4236	1.8942	-0.4907	-1.1621	-0.2044	0.3683	0.4107	0.4871	0.4284	0.2914	1.0375	-0.7923	-0.3295	1.5769	1.1461	0.2321	0.9505	0.6861	0.3455	-2.771	0.4302	0.7312	0.1888	-0.3114	0.4149	0.2314	1.7202	1.6544	0.1048	0.9099	1.137	0.3711	0.1204	1.2186	0.7831	1.2378	0.3462
orf19.903	GPM1	ND	ND	ND	ND	ND	ND	ND	ND	ND	0.0008	0.0008	ND	ND	ND	0.1378	-1.0116	0.5073	0.1021	-2.2657	-1.4457	ND	ND	-0.1664	0.6095	ND	ND	ND	ND	ND	ND	ND	ND	ND	ND	ND	ND	ND	ND	ND	ND	ND	ND	ND	ND	ND	ND	0.6571	-1.3471
orf19.6284	SRP102	0.2177	1.0979	0.9798	0.9028	ND	-0.9085	0.8995	-2.1343	0.5827	0.0007	0.0007	0.381	0.9697	0.492	-0.7986	-0.359	1.2545	0.1233	0.9203	0.5381	-0.9857	-1.0171	0.7622	-0.5448	-0.8963	0.6315	0.9048	1.9194	1.1528	0.8529	0.4891	0.301	0.5226	-0.4678	2.1391	0.4899	0.9547	1.3286	2.4449	0.5152	-2.1157	0.8073	0.4778	0.572	-0.9025	0.1671	0.6204	-0.0419
orf19.5244	MCD4	0.0592	0.0735	-0.1326	0.9152	1.5003	1.0163	1.054	0.6738	0.9323	1.1044	1.8741	0.6933	1.5448	1.4802	1.0425	1.8494	-0.6051	0.3373	0.4646	0.7478	-0.7459	-0.4758	0.361	0.6408	-0.7047	-1.0002	0.4753	0.6746	-0.3803	-0.4197	-1.357	-0.3436	0.7976	-0.8471	0.7374	-0.8779	0.299	0.0645	0.2416	0.8652	0.4182	0.8079	-1.8779	-0.8125	-1.3597	1.5452	0.5494	1.5888
orf19.969	PRS1	-1.2538	0.0878	-0.1146	0.0733	-0.8461	0.4119	0.8513	0.5577	-0.5861	0.1319	0.86	0.3438	1.0872	0.2556	-0.5244	1.6038	-0.5374	-0.2647	-1.4513	0.5936	-1.0561	-1.1941	-1.3089	0.2824	0.2652	0.1971	-1.3721	1.1552	2.9952	4.0231	0.576	-0.2913	0.2122	-0.75	-0.8044	-0.5235	0.3506	-0.9715	0.3394	0.2319	0.1288	0.3103	-0.6166	0.6277	-0.6968	1.0749	0.7198	1.717
orf19.796	HYM1	-1.2077	-1.3844	-1.5302	-1.2996	0.0583	0.5797	-0.5836	0.7876	-1.4615	0.3744	-1.187	-1.1345	-0.9577	0.4106	0.1807	0.247	-0.3529	0.4248	-1.162	0.7064	0.0077	-0.7163	0.3486	0.3671	-0.6253	0.3614	0.5848	0.3777	-0.8897	-0.6977	0.3297	0.182	0.5335	0.8425	0.0949	-0.3158	-1.2648	-0.8471	-1.0348	-0.794	-1.2915	0.1165	0.2044	-0.7773	0.6757	-1.7001	-1.2814	-0.4328
orf19.3197	PAP1	1.2182	0.4013	-1.734	-1.8266	-1.1918	-1.5153	-1.0967	0.168	-0.4486	0.8053	0.9669	1.6079	1.377	1.4584	-0.3994	-1.8959	0.8816	0.403	-0.3838	0.2278	-0.3034	-0.8872	-0.6535	0.441	-2.7127	-2.747	-3.5756	1.7255	1.3637	1.242	0.2887	0.0573	0.854	-0.6829	1.2039	2.0813	-1.1566	-1.9603	-1.1412	-1.1026	-1.9289	-2.0626	0.7905	-0.5667	2.0624	-0.8002	-0.7437	1.0035
orf19.964	SMC4	ND	ND	ND	ND	ND	ND	ND	ND	ND	-0.5015	-0.9041	ND	ND	ND	-0.3809	-0.2284	0.9383	0.8322	1.2316	1.4418	ND	ND	0.7273	0.2483	ND	ND	ND	ND	ND	ND	ND	ND	ND	ND	ND	ND	ND	ND	ND	ND	ND	ND	ND	ND	ND	ND	0.2411	-1.5715
orf19.325	CFT2	-0.7702	-0.9549	-1.3079	-1.5011	0.8648	-0.608	-1.1809	-1.1763	0.2316	0.2133	0.0239	-0.7086	0.0953	0.9097	-0.483	0.6718	-0.3164	0.3906	0.6232	0.4227	0.2622	0.2226	-0.2989	-0.2549	-0.6963	0.0509	0.3221	-1.9329	-1.5008	-0.527	2.6582	0.7094	-0.2802	0.7981	0.7019	0.6626	-1.0956	-2.1084	-0.6549	-2.092	-0.8368	-0.5189	-0.3167	0.532	0.9178	0.1673	-0.9911	0.0108
orf19.3086	SEC10	1.3072	1.9033	1.8833	2.074	1.166	1.7516	2.6016	0.905	1.0056	1.0906	1.2787	1.6497	1.2691	0.092	1.2243	0.5706	-0.7666	-0.446	-0.6439	1.4033	0.4833	0.3453	1.6522	1.1809	0.2703	0.3471	0.9441	0.1758	1.2771	1.2289	0.0763	1.3412	0.5662	0.669	1.1298	1.6406	0.4004	0.8674	0.7454	0.1206	0.558	0.7651	0.2134	-0.078	1.6417	0.683	-0.5663	0.2171
orf19.4281	IFH1	-0.7703	0.1396	-1.0655	-0.9146	0.1343	-0.8473	-0.3484	-1.823	0.1647	1.6611	1.6275	-1.1771	0.5079	0.8696	0.969	1.7291	0.2252	-0.7625	-0.3642	-0.2931	0.6986	0.6388	0.8648	1.1072	-1.1163	-1.032	-0.739	1.139	-1.5059	-0.6663	0.1893	0.1889	0.0559	1.1449	-1.3412	0.2733	0.4843	-0.5883	-1.0039	-0.7235	0.5852	1.2621	-1.7852	-0.264	-1.2313	-0.6979	-0.3853	0.3661
orf19.5487	CDC46	0.2866	-0.8762	-2.1382	-1.5778	-1.3926	-1.1169	0.3393	-0.8728	0.3944	1.0845	0.496	-0.7252	-0.6857	1.1161	-0.3459	0.5762	1.3028	1.9639	0.8719	0.2961	0.4517	0.8	-0.4962	1.1373	0.5534	-0.7745	1.0191	0.4407	0.6816	0.5113	1.3775	1.1358	0.9579	0.0675	-0.2665	1.5185	0.685	0.7007	0.6962	-0.9466	-1.3576	-0.8708	0.8316	-1.9221	0.825	0.1295	0.0585	0.1539
orf19.4363	SGD1	0.207	-0.1686	-0.4036	-1.2443	1.4933	0.1449	-0.9001	0.0209	0.4333	0.0007	0.0007	-1.0126	-2.5364	-0.8342	-1.1254	-1.1391	0.0878	0.2371	0.3823	1.0636	-0.3648	-0.6102	0.3374	0.0415	-1.3617	0.4321	0.6895	0.5686	0.9058	0.6626	0.1054	0.1973	0.7239	1.0683	-0.2365	0.7333	0.1946	-1.5322	1.3486	0.5072	0.0323	-0.875	0.7931	0.65	1.6912	0.5094	-0.2632	0.882
orf19.5391		1.4432	1.8404	1.7618	1.2162	0.0992	0.5789	1.0564	0.9739	0.9173	0.5289	0.0916	2.8013	1.6938	-0.5715	-0.3818	0.2422	-1.6937	-0.5427	-1.7247	1.7726	-1.3598	-1.3155	0.1936	1.1929	0.5465	0.6956	-0.6596	0.9245	0.7888	0.5732	-0.9987	2.0319	0.3967	0.138	1.1119	-3.5651	1.5346	0.8244	1.4468	0.3061	0.1248	0.1895	-3.1163	-1.0882	0.3495	0.7243	0.6234	-0.4076
orf19.3000	ORC1	0.3984	-0.9176	0.4762	0.4671	0.2505	-1.7433	-1.8752	1.2366	0.4679	-0.977	0.0111	0.8465	-1.0462	1.7381	-0.8919	-0.4435	-0.2498	0.0565	-0.6888	0.5056	0.4756	0.3402	-0.6706	0.205	-0.902	-1.392	0.8137	0.6068	1.1126	0.1057	0.1591	1.3298	0.5323	0.7031	0.1572	-0.8075	0.5935	0.8168	1.4629	1.7651	0.1926	0.7683	0.2326	-1.4812	-0.3191	0.1005	-1.2993	0.7801
orf19.5174	TAF13	ND	ND	ND	ND	ND	ND	ND	ND	ND	0.0007	0.0007	ND	ND	ND	-1.5623	-1.1924	0.5411	2.1097	4.2431	3.4252	ND	ND	-0.5789	-1.3788	ND	ND	ND	ND	ND	ND	ND	ND	ND	ND	ND	ND	ND	ND	ND	ND	ND	ND	ND	ND	ND	ND	1.3791	1.161
orf19.1531	RNA14	0.3165	-0.2981	-0.7444	-0.413	-1.545	0.1711	0.2219	1.0457	0.23	0.8739	0.4024	0.631	-0.8035	1.1494	0.1673	0.409	-0.6871	-0.8625	-1.1611	-0.9892	0.9273	0.6781	0.9201	0.2172	1.1186	-0.9584	0.7778	1.1425	-1.0022	-0.9073	0.9511	0.5938	0.1393	1.5364	0.9629	-0.3506	0.2723	-1.1564	0.0664	0.9789	0.1252	-0.8099	-1.3893	1.5011	0.148	0.8076	0.6272	-0.5711
orf19.6909		0.615	0.2831	0.9127	0.7734	-0.2846	0.8515	1.2464	1.941	1.4368	1.7263	2.0703	1.6891	1.6644	0.6932	0.1749	0.7635	-0.7433	-0.5714	1.1794	0.3802	-1.0894	-1.185	-0.7108	0.9269	-0.1846	1.1354	0.3004	0.7983	0.514	0.7454	0.6643	0.2911	0.8453	-0.3572	-0.4734	-1.3003	0.5005	-0.8271	1.1978	0.607	0.5246	1.367	-1.3971	1.4636	0.4958	0.0205	0.6383	1.3899
orf19.1111	TAF9	-1.5055	1.6045	1.9575	0.6053	0.9266	0.7041	1.3947	0.3736	0.6565	0.6988	1.5946	0.3806	0.0619	1.8829	2.3684	1.0173	0.8177	0.387	1.4769	1.0971	1.1141	1.8914	1.0762	1.0918	2.3055	1.4603	2.3062	-1.3747	-0.6021	-0.9914	0.0329	0.5582	0.1653	1.2095	-0.9294	-0.2303	-1.323	-1.3104	-0.8243	0.0996	-0.1632	0.1974	-0.3078	1.4234	-0.6816	0.8129	0.7301	0.8261
orf19.4903	GPI12	0.0665	-1.3323	-1.4136	-0.6274	-0.4609	-0.7667	-0.9583	-1.3729	0.2999	0.4145	0.4586	-0.3989	0.1436	-1.3133	0.6008	0.2765	0.6497	1.2353	1.1682	0.5194	-1.1918	-1.007	-0.1097	0.474	-1.2901	-0.6342	0.0658	-1.3601	-0.7033	-0.1991	-0.3515	0.4554	-0.5722	-1.7292	-1.3264	0.6434	0.1278	0.2122	0.0297	0.5038	-0.3097	0.2801	0.5069	0.095	0.4009	-1.1474	0.3572	1.345
orf19.2675	HSH155	-1.2519	-0.195	0.0564	0.1695	1.5162	0.1155	-0.8575	0.348	-1.5732	0.0007	0.0007	-0.8356	1.451	-0.6013	-0.213	-0.5021	-0.5083	0.2829	-0.5265	0.3689	-0.4312	0.1671	0.8319	0.2013	-1.6524	0.4855	0.1709	-1.1805	0.82	-1.2114	-2.7794	0.6451	-1.1267	1.0006	-0.5922	0.2371	2.0109	1.2553	0.6319	0.8938	0.2661	0.5458	1.2479	-1.4612	-1.8231	-1.1688	-0.8697	0.1579
orf19.3962	HAS1	0.0518	0.2629	-2.2792	-2.98	0.2976	0.3611	-0.8939	-1.5088	-0.8971	1.4401	0.9676	1.092	1.0624	-0.079	-0.5582	0.9383	1.7258	1.3231	1.8884	1.4339	-0.9375	-0.3774	-0.9407	0.9739	-1.4903	-2.5944	-3.5596	1.3546	1.7532	2.7343	-0.1094	-0.7147	0.9161	0.6159	-0.423	-1.1239	-1.4104	-0.8914	-1.6385	-1.5462	0.2317	-0.1972	0.4132	0.9868	-0.3495	0.5191	0.9051	0.9159
orf19.4635	NIP1	1.114	0.7047	0.9531	0.707	-0.7504	1.1517	0.9777	0.8156	0.7587	0.0438	-0.5442	-0.5519	-0.6222	0.1356	-0.9909	-1.1945	0.3602	0.5835	0.3512	-0.5618	-1.0223	-0.1668	0.577	-0.2954	0.6844	1.2323	1.3345	1.0627	0.3153	0.4718	1.1621	0.7005	1.3764	ND	-2.3209	1.7683	ND	ND	ND	1.078	0.1826	-2.0086	-0.2578	-1.1218	0.5052	-1.4084	-0.5019	-1.0908
orf19.2528	BDP1	-1.587	0.6243	1.7267	1.3282	1.1026	0.5556	0.1849	0.6617	0.0831	0.437	0.3667	-1.9168	0.6979	1.3154	0.2998	1.0272	-0.4677	0.9138	0.6432	2.4661	2.0643	2.0584	0.9161	0.6443	1.4239	-0.4062	0.0831	0.0198	0.4525	0.2507	1.2804	0.9079	0.9474	1.4243	1.0766	1.3276	ND	ND	ND	-0.456	0.7235	1.2076	0.1531	0.2505	1.6581	0.6997	0.5532	0.026
orf19.7050	NOP15	ND	ND	ND	ND	ND	ND	ND	ND	ND	0.0008	0.0008	ND	ND	ND	0.0295	-0.9061	0.633	0.6447	-0.9136	0.0385	ND	ND	-0.7771	-1.1659	ND	ND	ND	ND	ND	ND	ND	ND	ND	ND	ND	ND	ND	ND	ND	ND	ND	ND	ND	ND	ND	ND	0.3755	0.0278
orf19.6234	IPI3	0.2419	-1.404	-0.9613	-1.1405	0.7693	-1.2388	0.127	-1.4209	-1.2562	0.3888	-0.9082	1.1014	-0.4466	-1.0982	-0.2075	-0.3964	1.4651	0.9372	0.796	1.0768	-1.2565	-1.0419	1.24	-0.489	-0.5894	0.5434	0.3434	-1.4862	-1.0268	0.0979	1.1855	-1.0946	-0.6141	0.7679	0.797	0.5981	0.9581	0.3747	1.0919	0.2941	-1.4139	-0.4954	0.9734	-1.3156	-0.6086	-1.0971	0.0093	1.079
orf19.2404	POP1	ND	ND	ND	ND	ND	ND	ND	ND	ND	1.6493	0.8336	ND	ND	ND	0.1635	0.5871	1.4161	0.5344	0.2115	-1.0204	ND	ND	0.7895	-0.5451	ND	ND	ND	ND	ND	ND	ND	ND	ND	ND	ND	ND	ND	ND	ND	ND	ND	ND	ND	ND	ND	ND	-0.6153	-0.6925
orf19.3199	PIK1	0.3746	0.6077	1.5096	0.9251	0.6509	0.1589	-2.1255	1.6784	-1.8911	-0.5415	-0.3422	0.6622	1.0123	1.3803	0.1333	0.5156	-1.8107	-1.8903	-2.1084	-1.4881	0.2442	0.181	0.6003	0.1507	0.8579	0.7173	0.7639	0.2974	-0.3101	0.2201	0.5238	0.8798	-0.4836	0.3258	-0.8411	0.6729	0.3258	-0.7875	-2.5161	0.4569	2.3501	2.6774	-1.7727	1.2382	ND	1.7691	0.8323	0.2748
orf19.2307	PFS2	0.9103	-1.5755	-0.8467	-1.3223	0.8109	-1.1635	-1.0119	-1.3537	-0.7396	-0.1699	0.4454	-1.838	-0.909	-0.7116	1.5097	0.5941	0.1859	-0.7245	-1.5006	-1.2384	-1.6879	-1.345	0.6201	-0.5701	-1.2207	-0.9719	-0.5864	0.3698	0.1072	-0.4548	-1.5629	-2.2201	-2.4171	-2.9141	0.5536	0.2243	1.7031	0.8471	0.4756	0.5642	-0.8773	-0.5479	0.1927	-1.2658	0.2568	1.153	-0.7189	0.0719
orf19.5732	NOG2	-1.4336	0.0832	0.5071	3.2096	0.8878	0.2204	0.6018	0.6682	-0.7826	0.0008	0.0008	1.6455	1.6837	1.0974	0.3629	0.2791	0.9968	-2.4929	0.9111	0.0417	0.2644	0.7813	0.2682	0.2571	1.4735	-0.6053	1.7336	0.056	0.8578	0.3234	ND	0.2571	0.8513	1.0365	-1.4766	-0.4625	-1.6628	ND	ND	1.0495	0.6024	0.7024	-1.1624	0.5392	-1.2386	1.9792	-0.2058	-0.0773
orf19.544.1	PRE6	0.4246	0.507	0.6867	0.6792	0.7375	0.6437	0.8858	-0.258	-0.9162	0.9607	0.724	-1.2486	0.7596	-0.9353	0.6061	0.5347	0.1112	0.1179	0.0508	0.6993	0.6861	-2.0743	0.9687	-0.3593	0.8676	-0.9971	0.5041	2.1714	0.2125	0.2332	ND	ND	-1.342	-3.1059	0.0699	0.3828	1.1131	0.727	0.13	0.9113	0.1357	0.1431	0.3605	0.2616	1.6423	1.1081	0.0755	-1.3829
orf19.1661	DBP5	ND	ND	ND	ND	ND	ND	ND	ND	ND	0.793	1.5346	ND	ND	ND	0.2447	-1.0871	0.2409	0.1638	2.3814	2.3311	ND	ND	0.578	0.4059	ND	ND	ND	ND	ND	ND	ND	ND	ND	ND	ND	ND	ND	ND	ND	ND	ND	ND	ND	ND	ND	ND	0.0892	0.3303
orf19.1701	RKI1	1.6773	1.1101	1.096	1.2163	-0.9847	0.2246	1.2048	1.2372	0.2229	-1.1889	0.1865	0.5064	-1.5517	1.2908	0.3115	0.2854	-1.5758	-1.2229	-0.9856	-0.8176	-1.1322	-1.208	1.1249	-0.3223	0.5667	0.3241	0.0278	0.2217	1.1459	0.0235	-1.4658	-1.4701	-1.2978	0.0445	ND	0.0367	0.2189	1.1933	0.6735	0.4964	0.2034	0.5483	0.2114	-0.996	0.9246	0.4386	0.1329	-0.5664
orf19.6598	LAS17	-0.13	1.5993	1.7609	0.6451	-1.0371	1.0599	1.3637	2.0415	0.9619	0.0008	0.0008	0.5176	0.0389	1.1005	0.1536	-0.8925	0.3388	0.3292	1.1348	0.4352	0.1135	0.1949	0.4138	-0.8546	0.3845	0.826	0.3796	0.9487	0.3111	-0.3701	-0.7881	0.8723	0.9457	-1.9959	1.9393	-1.1524	2.3608	2.5835	1.1246	0.6764	1.2506	1.0945	0.6647	-0.5804	0.7931	1.5078	2.66	0.83
orf19.7392	DED1	0.9988	1.0835	1.6588	2.0238	-0.1299	2.058	2.3094	2.3025	1.0487	1.1471	1.0084	-1.5825	2.2532	0.5872	1.0186	0.7909	0.5231	-0.5663	1.2375	1.6559	-0.5068	-0.1542	0.4958	0.8137	1.3628	-1.1734	0.2041	1.4062	1.2715	0.1749	1.3462	-0.9795	0.9295	0.2001	-1.3305	-1.3493	1.3674	0.0171	0.4072	0.4404	1.6173	0.6536	1.1025	0.7656	-2.1737	-0.5503	-0.5377	0.0858
orf19.5416	ESA1	-0.6378	-0.4922	-1.7016	-1.5762	-1.268	0.1085	1.1574	0.6595	0.0785	1.0668	0.9993	0.3473	0.3649	-1.0734	-0.8318	0.1995	-0.5622	0.0656	0.4442	-0.2275	-0.3529	-0.606	0.3124	0.0197	0.6266	0.9131	0.0836	1.0066	1.1409	-0.4821	0.2802	-1.2293	-0.5161	-0.6381	0.0061	-1.1151	-0.4832	-0.173	-1.0096	0.5472	0.6252	1.1632	-0.1323	1.1587	0.3609	1.6172	1.0185	0.4601
orf19.6861		-0.9331	-0.9007	-0.2095	0.2257	0.5249	-0.105	-1.4186	0.1991	0.0537	-0.8424	0.5816	0.5962	1.0029	0.7381	0.8641	0.4513	-0.1496	-0.6461	-1.0311	-1.2286	0.2828	0.9133	-1.567	-1.1136	-0.8193	-0.8645	0.5478	1.0522	1.3344	1.1811	0.3936	0.7496	0.3802	0.6242	-0.9698	1.1257	0.2453	-0.9644	-0.8842	1.338	0.2674	0.2713	3.018	-0.5009	-2.3374	-1.0359	-0.9545	-0.8288
orf19.6931	CLP1	-0.8011	0.0375	-1.2756	-1.507	0.047	-1.5915	-1.5409	-0.3812	-0.9494	0.4536	-0.9381	-0.7736	-1.3432	-0.2947	-0.6286	0.2984	0.6137	-0.9645	-1.3306	-1.2262	0.2577	-0.8615	0.7135	0.077	0.8996	0.4988	0.8046	-1.1391	-1.4543	-1.8829	3.4094	0.9364	-1.3654	0.6471	0.6819	0.4689	-0.9305	0.0937	0.1523	-1.0982	-1.5873	-1.5571	-0.0278	0.5407	1.8652	-0.2881	-0.837	0.3876
orf19.485	CDC31	-1.2588	0.398	-0.5736	-1.0367	-1.2963	-0.626	-1.198	0.1282	-0.3644	0.0008	-1.1989	-0.6338	-1.1847	-1.4105	-1.7633	-1.0907	0.5484	1.9148	0.7631	1.0815	0.3702	0.5054	-0.7437	-1.1231	-1.0148	-0.8872	-1.2342	-0.7748	-1.5065	-1.1242	1.2316	0.4505	0.0745	1.3324	-1.3492	0.5464	0.1818	-2.2637	0.1248	-0.2198	-0.522	-1.0527	0.0206	-0.8026	0.731	-1.2703	0.3757	0.1453
orf19.6584	PRT1	1.0414	3.0332	3.4388	3.0234	1.6088	2.3974	2.4058	1.2381	0.3796	0.2408	0.3806	0.4437	0.3452	1.3736	-0.7757	-1.5727	1.5401	1.8137	1.7486	1.7848	0.8597	1.0227	-0.1446	-0.3384	3.163	3.3442	2.964	-0.5023	0.9866	0.5448	1.2328	0.2028	0.6778	0.6551	-1.4125	-1.3308	0.8259	-1.3607	-2.0176	1.0472	0.0463	-1.301	-1.2757	-0.1879	-1.3446	-2.2855	-0.1709	-0.503
orf19.6783	MRS6	ND	ND	ND	ND	ND	ND	ND	ND	ND	1.9584	1.1492	ND	ND	ND	0.4765	0.7224	0.063	-0.5411	1.5136	0.5725	ND	ND	0.0522	0.6193	ND	ND	ND	ND	ND	ND	ND	ND	ND	ND	ND	ND	ND	ND	ND	ND	ND	ND	ND	ND	ND	ND	1.6829	0.3961
orf19.5413		0.5846	1.5869	2.5449	2.2726	-0.9985	1.3005	0.7188	3.0044	0.446	0.8618	0.0321	3.9318	0.9808	-1.2416	0.0995	0.0102	-2.2342	-1.0582	-0.6825	0.1276	-0.2291	0.093	-0.6832	-0.6996	1.3032	0.4469	0.5602	0.6558	0.925	0.6711	0.243	3.029	1.7827	-2.0822	ND	-0.9197	0.0413	0.2374	0.3243	0.5119	0.032	1.836	0.4792	-0.2672	0.0726	-1.7776	1.2244	0.2504
orf19.3476	HRR25	-1.3906	0.2995	-0.3101	-0.4011	0.3641	0.8679	0.0508	0.5236	0.0556	0.1231	0.2797	1.3122	-0.48	1.0469	-0.4404	0.0788	0.2545	0.9026	0.3069	-0.1917	0.731	0.5171	0.2692	0.9227	0.9263	0.8112	1.0661	-0.5783	0.8378	0.6195	1.1701	0.4537	1.2847	0.7957	0.7029	0.5605	-1.0064	-0.7256	-0.5692	-0.5299	0.903	1.3919	1.1512	1.4138	0.2859	0.1118	0.0581	0.0639
orf19.3474	IPL1	1.1054	-0.7805	0.3699	1.0616	3.7414	1.086	0.2342	0.6862	0.5	2.2119	1.2685	-1.2777	-1.9314	1.6224	1.7921	0.0586	0.1665	1.0697	-1.9571	-1.6165	-0.7631	-0.9554	1.0501	1.1544	0.0518	0.3468	-1.1036	1.171	-0.2693	0.085	-1.3422	0.3209	-0.4306	1.2531	0.9047	-2.4032	0.9697	1.8283	0.8607	1.2191	1.4661	1.1255	0.6358	-1.4718	-1.5311	-1.8727	0.1563	0.4262
orf19.6536	IQG1	0.108	0.8737	1.0739	1.472	2.1176	0.6779	0.1299	1.639	1.07	0.0008	0.0008	0.603	0.7379	1.921	-0.7842	0.4941	2.5493	-0.922	0.2378	0.8878	0.6405	1.2366	-1.1633	-0.3368	0.2737	0.4602	0.77	-0.9057	0.3141	0.2795	0.8965	1.2484	0.1455	0.5208	1.5285	1.0984	1.2075	0.649	0.8163	-1.0727	0.6078	0.9295	-0.3699	-1.1146	0.2772	-1.0578	-1.2303	-0.2169
orf19.2040	TAH18	0.7119	1.3026	1.5255	0.9131	-1.6794	0.7705	0.354	0.3329	0.0513	0.0221	0.8925	0.0706	-0.6507	-0.9493	-0.4235	0.2132	-1.2518	-0.6495	-0.4636	-1.0932	-0.4277	0.6118	0.055	0.1071	1.3091	1.1368	0.7532	0.7328	0.6269	1.4346	0.138	0.4903	0.2146	0.0707	2.0737	-0.9914	1.573	1.5907	2.6019	0.1029	0.7415	0.8366	0.2205	-1.0593	0.0397	0.7748	0.4287	0.5071
orf19.3059	SUA7	1.3353	-0.4647	-0.6907	0.142	0.3584	-0.8409	1.2563	0.2848	0.5182	0.0007	0.0007	1.4869	1.7825	0.9681	-0.5483	-1.3002	-0.6169	-0.8078	1.2882	1.6222	0.5402	0.8455	0.2485	-0.8674	0.82	0.1677	0.5857	2.7469	-0.9427	0.8909	0.0271	1.1207	0.5376	0.6746	-1.0341	-1.604	-0.9721	0.2492	ND	2.1936	-0.4888	-1.4329	0.1268	0.2185	2.4714	0.3335	0.6412	-2.6191
orf19.2230	RDS3	0.5973	-1.2567	-1.4045	-1.504	2.4014	0.6006	0.2022	-1.4092	-1.674	1.0509	1.8808	0.7503	1.9275	0.5927	0.2895	1.5048	-0.4636	1.1935	-0.2325	-0.6286	-2.1767	-1.3001	1.2425	1.8387	-2.6702	-1.7238	-0.4333	0.5499	-0.9045	1.1893	1.2035	0.4829	0.8647	0.255	0.1689	-0.8941	3.7268	1.1418	0.4535	1.1145	1.5536	2.7782	0.1223	-2.6946	-0.5959	0.695	-0.6538	-0.4136
orf19.3524	SGV1	1.0615	-0.6239	0.7834	1.1379	1.7933	0.552	0.1894	1.2497	-1.4709	0.0173	-1.0667	0.4651	-0.2523	1.5294	0.0923	-2.2337	-0.7371	0.4709	-1.1996	1.0144	0.2935	0.3641	-1.5138	-1.5636	0.252	0.1134	1.3525	-1.0708	-0.8421	-2.4726	1.2354	0.9524	0.0442	0.8035	0.1244	-0.2815	1.1693	1.6023	1.1831	0.0531	1.208	1.7977	0.4126	-2.8101	-0.5156	-0.5344	0.2176	-2.0124
orf19.7343	PRP4	0.7288	0.5472	0.9265	0.9147	-1.4905	1.1721	0.5143	0.4541	1.52	0.2682	0.3852	-0.5288	0.6242	0.6395	0.5697	0.0597	0.2634	1.0598	0.8872	1.5748	1.6092	0.927	-1.3935	0.2482	0.1655	1.5395	-0.1461	0.2031	1.0812	1.0435	-3.2709	0.2282	0.4362	-0.3283	-1.4408	-0.9494	-1.7432	1.2333	-0.8377	0.5383	-0.2877	1.1364	0.2652	1.9267	0.6135	0.634	0.893	0.6662
orf19.1254	SEC23	0.1051	-0.1683	-2.1696	-2.1032	1.0043	0.2696	1.2176	1.0407	0.3321	0.9916	1.1065	0.0747	0.2098	0.9066	1.6263	1.8018	-0.7861	-0.9291	-1.2804	-0.9739	-0.7639	-0.7637	1.0234	1.2239	-0.3308	-0.736	-0.7888	-0.7839	-0.9718	-1.1895	-0.3365	0.1386	1.0726	0.101	-0.9884	0.5821	0.0272	-0.8341	-0.6826	0.363	0.8687	0.9844	0.1546	0.8493	0.6208	0.8322	0.3687	-0.6897
orf19.3231	CDC27	1.2737	0.5547	1.6704	1.0201	0.6867	0.7185	2.7727	2.0127	0.9745	1.4382	1.303	-0.4708	1.1862	0.2629	1.2024	0.9135	0.1417	1.2707	0.8546	1.8076	-0.6147	-0.6115	1.382	0.7232	0.6259	0.2691	0.4169	0.8559	0.6866	1.195	0.9786	-0.8745	0.9603	0.3512	1.4834	0.419	1.9853	1.467	1.2768	1.5275	0.4637	1.2334	1.2397	-1.1282	0.5052	0.3233	0.784	0.1175
orf19.5792	SMP3	0.5597	-1.6942	-0.5355	0.0066	0.6208	-1.1253	-0.5003	-1.3057	0.2638	1.2108	0.6125	-1.44	-0.8976	0.8156	1.6584	-0.4509	2.1171	0.8182	1.2871	0.1805	-1.0273	-1.2319	2.0685	0.082	0.1925	0.7821	0.7743	-1.0317	-1.2474	0.0706	1.3314	0.5788	-1.4206	1.4123	0.8605	0.4148	1.3797	0.9287	0.7758	0.8047	-0.2569	0.8738	-1.2072	0.0167	0.9453	0.3198	0.3598	1.0561
orf19.7548	SRB7	ND	ND	ND	ND	ND	ND	ND	ND	ND	0.0008	0.1365	ND	ND	ND	-1.5404	-1.3454	-0.9023	0.568	0.1781	2.4469	ND	ND	1.0653	-0.9014	ND	ND	ND	ND	ND	ND	ND	ND	ND	ND	ND	ND	ND	ND	ND	ND	ND	ND	ND	ND	ND	ND	0.7971	0.0489
orf19.5507	ENP1	0.0564	0.9281	1.6692	0.6533	-1.1373	1.5674	1.6539	1.5434	0.942	0.6181	1.33	1.0042	1.3501	1.1623	0.3632	1.5271	-0.3146	-0.5981	0.195	-0.2119	0.5903	-0.5164	-0.6857	0.1555	1.1617	1.0416	1.0496	0.8259	0.9721	0.0199	-1.4061	1.4861	2.3795	0.9916	1.0688	0.7042	-1.472	-1.7893	0.071	-1.1209	-0.3117	0.3159	0.1021	1.1176	1.7939	1.7188	0.7026	1.1008
orf19.4732	SEC24	0.0498	-0.5865	-2.6353	-2.7547	0.8712	-0.8566	0.9493	-0.2419	-0.9538	1.2396	1.4927	-1.0046	-0.7184	0.163	2.3223	2.025	-0.5376	-1.245	-1.1725	-1.2069	0.1109	0.0168	2.2934	1.125	-1.1062	-0.6097	-0.7802	-0.5341	-1.3258	-0.9903	-0.8746	0.0802	-0.4445	0.0975	-0.1075	0.3152	-0.4678	-0.9245	-0.1576	-0.5493	-0.4945	0.1085	-0.5394	0.1859	0.7626	0.1958	-0.7294	-1.0367
orf19.2885	PRI2	0.1724	0.355	0.0256	-0.5197	-1.5051	-0.1759	-0.481	0.1077	1.0855	-0.121	-0.4751	0.6843	1.0827	-1.5416	-2.8592	-1.0566	2.3446	1.0827	0.6411	0.982	1.8026	3.0092	-1.1897	-1.7603	-1.1143	-0.7601	-1.6217	-0.8754	0.4311	1.396	0.1172	0.8368	1.1407	-2.8425	3.2846	0.4369	-2.037	1.4464	-1.117	-0.6281	-0.7398	-0.707	1.8522	1.3792	-1.1252	2.1212	0.6653	0.3898
orf19.5090	TAD3	0.8351	-0.6041	0.0373	0.1426	1.4751	-1.2988	0.4261	-0.7758	-1.0959	0.0008	0.0008	-1.8177	-1.6962	0.8619	-1.0213	-0.938	0.1528	-0.4255	0.188	0.8531	0.1024	-0.521	0.69	-0.8104	-0.4906	-0.7081	-0.3194	-0.145	0.5399	0.4906	0.5622	-1.3586	0.2623	0.2537	-0.9449	0.1645	0.2373	2.7534	-0.8289	-0.2147	1.9167	-2.3336	0.3336	0.5014	1.1386	-1.0263	0.9987	-0.7028
orf19.2029	RFC5	1.7258	0.18	-0.1936	0.5742	0.4706	0.1315	0.6795	0.9395	-0.2405	0.3542	0.9444	0.7116	0.2299	-2.1728	0.3259	0.2159	0.6076	0.299	0.2823	0.5084	-0.9711	-1.1146	0.667	0.186	0.4683	0.2697	-1.2417	-0.4966	0.904	0.2643	-1.8565	-1.749	-1.2928	1.2521	2.1551	0.648	0.9723	0.1408	1.2811	-0.1944	0.2126	0.8261	0.3106	0.5975	0.7765	1.8371	0.708	1.2721
orf19.5833	UFD1	-0.2497	-1.2015	-1.314	-0.3823	1.3696	0.6535	0.1153	0.069	0.0997	0.5201	0.505	-1.3431	-0.4757	0.0856	0.8283	1.8558	1.1359	0.9531	1.7248	0.8172	1.7648	1.1761	1.9408	1.076	0.8952	0.4443	0.5452	-1.3647	-0.5216	-0.5599	0.769	0.517	-0.6269	1.0428	0.7612	0.7824	-0.8601	-1.6266	-0.6558	-1.5465	-1.5898	-1.3361	-0.4275	0.8855	0.0243	-0.8266	-0.1199	-0.9305
orf19.488	MEX67	0.6001	-1.7149	-1.6433	-1.0193	-0.3429	-1.5425	-0.4929	0.246	-1.5436	-0.8437	-1.262	-1.4382	0.3444	0.1123	1.4891	1.4097	-0.3397	2.1494	1.2791	-0.2873	-1.6703	-1.5416	-0.8764	1.5721	-1.685	-1.9097	-2.4332	0.3896	-3.268	-2.795	2.0202	1.6342	-0.895	-1.9086	-2.7968	-0.8424	1.098	1.4519	2.52	0.4318	ND	2.835	-2.8261	-2.4481	0.9903	-0.2179	-2.021	0.3689
orf19.1771		-1.2616	0.5169	0.8411	0.6822	0.1163	0.3956	0.561	0.2477	0.55	0.2388	-0.7205	-0.1706	0.014	-0.2162	0.0042	0.7254	0.3286	-0.9746	1.8726	0.9957	1.3829	2.071	0.4827	0.4433	1.014	0.9727	0.3979	0.2123	0.1704	0.1547	0.1886	0.92	0.3903	-1.4676	0.0652	-0.9138	-1.6612	-2.0379	-1.8074	-0.3523	-0.6289	-0.4749	0.1665	2.003	0.7901	0.9372	0.1202	-0.8039
orf19.3211	RFC3	ND	ND	ND	ND	ND	ND	ND	ND	ND	0.0008	0.222	ND	ND	ND	1.3279	0.1048	-1.7804	0.3328	-1.4974	1.0723	ND	ND	0.5002	-2.2252	ND	ND	ND	ND	ND	ND	ND	ND	ND	ND	ND	ND	ND	ND	ND	ND	ND	ND	ND	ND	ND	ND	-1.6937	0.5491
orf19.4585	TFG1	-2.0169	0.2503	-0.17	-0.7235	0.2843	-1.4039	-1.2131	0.4936	-0.9812	0.0693	0.1044	-0.6011	0.2492	0.0408	-0.4915	0.1517	0.9932	0.7348	0.9004	1.6575	2.6638	2.1179	1.8435	-1.0831	0.2112	2.13	1.7281	-0.9584	0.083	0.4626	0.5064	0.0396	-0.0425	-0.5312	-0.0827	0.2564	0.1923	-1.0133	-0.2647	-0.9775	-0.6327	1.0136	0.3179	2.3275	0.9258	1.4404	0.8412	-1.9698
orf19.3696	TOM22	0.4869	1.1746	1.0834	0.8459	0.0246	0.3954	0.2969	0.1713	0.1401	-2.0532	-1.2441	1.1342	0.94	2.025	0.4583	-0.5625	1.1171	-0.6768	0.4223	0.107	0.5012	0.0162	-1.398	-2.2691	-0.5482	0.819	0.2393	-0.8481	0.9731	0.6702	1.0978	1.4959	0.6934	0.2476	0.0908	-0.9836	0.747	0.0135	0.6192	0.3638	0.9466	0.051	-0.5922	-0.2829	-2.7581	0.236	-0.7619	-1.7278
orf19.941	SEC14	0.2941	1.2895	0.7235	0.4956	-1.0522	-0.3199	0.3764	0.3354	1.1291	0.0291	0.0415	0.5286	0.6459	0.4888	-0.9887	0.6505	0.5461	-0.3984	0.8587	1.847	0.3364	0.2221	-0.7887	-1.0852	0.8937	1.1569	0.2998	1.032	2.0295	3.0362	1.4687	1.3497	1.9199	0.983	-1.2848	-0.3404	0.0906	1.105	1.0513	1.2845	3.2972	3.591	-0.647	0.5388	-1.2035	1.271	0.3829	1.2764
orf19.1453	SPT5	0.8589	0.9775	0.4041	0.7877	-0.7729	0.5123	1.7668	0.2925	0.1507	0.0007	0.6897	0.1745	1.0831	1.4714	-1.7017	-3.209	0.7381	0.5064	1.1359	0.2433	0.4212	-1.0294	-1.1958	-1.3319	-1.1854	0.9528	0.5601	0.7579	0.6418	0.1541	1.4354	1.6367	1.1722	-0.5613	1.0327	-1.3564	-0.4784	-0.5664	0.752	1.4465	1.873	0.8761	0.338	-1.0436	0.0471	0.107	-0.4726	-0.4151
orf19.5693	GAA1	1.3473	1.2217	1.5251	ND	2.0932	0.9318	1.5794	0.4692	0.8667	0.5934	0.7411	1.5597	0.0518	0.7924	-0.5504	0.2689	-0.3984	-0.6423	0.2133	0.1904	0.0457	0.5471	0.0014	-0.3593	0.5879	1.7204	0.9087	0.1591	1.1099	0.6813	0.0913	1.9228	1.0479	3.4148	1.1325	0.2822	2.4522	0.7583	2.8585	0.3134	0.37	0.8716	0.0632	-0.8272	0.9666	-0.7719	1.3719	0.5951
orf19.7635	DRS1	0.0763	1.2468	1.7022	0.8904	-2.1009	0.7925	0.2796	1.216	0.91	0.0793	0.2653	1.2057	1.5592	-3.1552	0.0624	-0.4211	0.1091	1.0185	0.3511	0.2752	0.4192	0.6275	0.5782	-0.2137	1.1585	2.4829	1.0192	-0.7525	1.3728	-0.4439	-2.1149	0.906	1.813	1.0578	2.5378	0.5058	-0.2217	0.2762	0.7579	-1.9095	0.2219	0.1001	0.8505	0.1758	0.2226	0.8998	0.8807	-0.425
orf19.7035	RFC2	0.3941	0.0804	-2.1107	-2.2067	0.8467	-1.3156	0.3265	-0.9219	0.2462	-0.6131	-0.7651	-0.447	2.3551	-1.177	-1.6204	-0.9785	-2.216	-2.3656	-1.8933	-2.2759	1.6995	0.5462	-0.2537	-0.348	3.0604	0.8481	0.0861	1.2647	0.102	0.2411	1.0236	0.1107	0.3875	0.3855	0.1023	0.2031	-1.7808	-1.0971	-2.4059	3.4239	-0.5782	-0.1295	0.3057	0.3636	-0.7261	-1.3864	0.5697	0.5701
orf19.6213	SUI2	1.1492	-0.4366	-1.1716	-1.7794	-1.251	-1.0929	-1.6482	0.0259	0.004	0.0008	0.0008	-0.9953	-1.2648	0.0451	0.4945	-0.6371	0.0243	-0.3135	0.5498	0.4571	-0.9136	-1.2527	0.5143	0.0416	-1.2067	-1.4457	-2.4679	-0.7452	-1.6222	-2.2421	0.8292	-1.11	-0.8989	-1.7107	1.2095	0.2446	-0.6601	0.231	-1.1944	-0.629	-1.8574	-3.2457	-2.3923	0.1452	1.1072	1.6192	-0.9513	-1.1997
orf19.2013	KAR2	1.9462	1.5187	1.7105	1.1565	0.3704	0.7111	0.1964	1.1879	0.7662	-0.7433	-0.7037	1.0386	1.2362	1.0642	0.1718	-0.3123	-0.2204	0.0004	-0.5483	0.3804	0.4248	0.4124	-0.8892	-0.5532	0.7348	0.4037	0.6792	1.0155	1.2024	1.8746	-0.9564	1.9335	1.3987	0.5475	0.7722	-0.4775	1.6754	1.7224	2.2131	0.5028	0.4411	0.5998	-0.1463	-0.6648	-1.2189	0.952	0.7988	0.3286
orf19.2215	GLE1	1.3688	0.4727	0.837	2.655	1.5167	0.2363	1.0648	-1.0322	0.5338	0.0008	0.0008	0.2299	-1.2269	2.4522	1.3139	-0.2988	-2.0573	0.5908	0.065	1.452	0.2378	1.088	-0.947	-0.7288	0.8658	0.1434	0.9797	-0.4309	-0.4492	0.1396	1.1763	1.6992	0.8891	0.2566	0.454	-1.5752	ND	ND	1.6626	0.2407	0.47	0.271	0.9244	0.1719	ND	-0.3088	2.7608	-0.3405
orf19.3561	CDC7	1.0004	-1.5939	-0.8302	-0.6618	0.5392	-1.0151	-0.2729	-1.476	-1.3667	0.3705	0.5693	0.0809	-0.9731	-1.7144	0.064	0.8687	0.5248	-0.8937	1.0356	1.6627	0.1542	0.4711	0.8601	0.6349	-3.2998	-2.2066	-1.5504	-1.6002	-1.6217	0.6371	-0.5169	1.0968	0.1284	ND	0.2484	-0.4015	-1.1828	-2.1456	-1.8325	0.046	-1.2481	-0.4121	-0.937	-1.262	-0.6456	-0.6086	-0.1602	-0.9149
orf19.5081	FUN12	0.4119	-0.5614	0.1002	-0.5394	1.3386	-1.0306	0.1243	-1.1456	0.7487	0.0008	0.0008	-1.0728	-2.2842	-1.0246	0.0737	0.7333	0.0795	0.063	0.5989	0.0105	0.3631	-0.7709	0.6556	0.0284	0.7887	0.1679	0.9094	-1.8807	-1.9346	-1.7469	3.2271	0.2475	-1.1366	1.2708	1.4027	-0.6036	1.4938	3.8037	0.2422	0.5913	0.4137	0.4057	-0.0265	1.1671	1.3629	1.6639	-1.4797	0.5441
orf19.586	ERV46	2.0127	2.4066	2.1056	1.7911	0.9134	1.7959	1.2897	1.7363	0.3964	0.2074	0.9527	2.2553	1.6296	1.5753	1.4031	0.4055	0.1267	1.4405	1.9211	-0.3679	0.557	0.2271	0.3656	-0.8689	1.0339	-0.2381	1.1279	-0.9029	1.2551	0.7497	0.5782	1.5597	2.0534	1.4914	1.4551	0.129	0.7208	1.2568	1.8878	0.701	1.836	1.9723	0.5039	0.0531	-1.8272	1.3344	0.5726	0.6268
orf19.5188	CHS2	0.5705	0.8812	0.9489	0.8081	-0.4804	0.4022	0.8677	1.4623	0.3532	-0.935	0.4527	-0.573	-0.8443	-1.198	0.2203	1.065	-0.7903	-0.1488	0.7962	-0.3737	-0.4953	-0.6032	0.4646	-0.5691	0.6672	1.1318	0.5554	-0.8588	-0.7146	-0.097	0.2502	-1.0599	0.1062	0.295	1.3704	0.4849	0.5594	0.333	0.0509	0.4244	-0.4682	0.3853	-0.8808	0.2159	0.8761	-1.0486	-0.4118	1.3128
orf19.437	GRS1	ND	ND	ND	ND	ND	ND	ND	ND	ND	0.6371	1.5414	ND	ND	ND	0.6767	0.217	0.9679	0.7108	0.6066	1.182	ND	ND	0.3011	0.502	ND	ND	ND	ND	ND	ND	ND	ND	ND	ND	ND	ND	ND	ND	ND	ND	ND	ND	ND	ND	ND	ND	-1.6176	1.2255
orf19.6640	TPS1	-0.6652	-0.8058	0.1959	0.0724	1.0723	0.0261	0.0796	-1.0947	0.246	0.7659	1.3219	-1.004	-1.9693	-0.5342	0.3754	0.2869	-1.0294	0.7354	0.3867	0.2714	-1.6691	0.244	0.7562	0.7648	0.7547	1.2531	1.6855	1.9648	1.9596	0.949	1.1858	-2.2662	0.2805	-1.009	-1.2497	1.5329	0.2753	3.8177	3.2	0.2121	0.9578	0.3417	-1.2336	-1.2416	0.0814	0.2955	1.5154	0.783
orf19.3859	YBR159W	-0.8288	0.0881	0.3344	0.0572	-1.1665	-1.8696	-2.2496	0.1348	-1.0497	0.0008	0.0008	0.0592	-0.8319	0.2908	-1.2526	-1.078	-0.6495	-1.1433	-1.4731	-1.2692	-0.7788	-0.6466	-1.4237	-1.3378	-1.4801	0.1375	0.9771	-1.442	-2.2054	-2.0694	0.2777	-0.6125	0.0124	1.4375	-1.064	0.0873	1.103	-1.153	-1.5223	-0.6995	-1.2136	-0.2592	-1.9288	0.5887	0.6303	0.1597	-1.2794	-1.0634
orf19.1413	YFH1	-0.9454	-0.6309	0.2155	0.1026	-0.386	-1.4417	-1.0039	-0.3247	0.625	-1.0389	-2.1903	-0.7103	-1.1825	0.037	0.6813	-0.6192	0.2543	-0.791	0.3924	-0.063	0.0083	0.102	0.4734	-0.598	-0.749	-0.7526	0.4975	0.4712	0.034	-0.6035	1.1068	0.6631	0.4349	0.4018	0.4522	0.1085	0.4625	0.4874	0.8405	-0.9981	-0.8278	0.2818	-0.2052	1.0376	0.3713	-0.8986	-0.7798	0.1258
orf19.6075	CDC36	0.6673	1.2093	1.058	1.0378	-1.0048	0.9978	0.9995	0.1745	-0.0883	-1.0355	0.4119	0.7119	1.8288	-2.6327	-1.1811	-0.4298	-0.6858	0.0698	-0.7957	0.5824	-0.9818	-1.1585	-0.6125	-0.5101	1.0326	1.4721	0.6875	-0.5922	0.146	-0.7959	0.0835	-1.5852	-1.0642	-2.1163	1.2863	-0.5733	-0.4157	1.0264	-0.6498	-0.5716	-0.799	-0.222	0.2985	0.8837	-0.7102	1.3474	0.97	-0.5188
orf19.3265	TRM1	0.5071	1.4462	1.4941	1.4648	0.016	0.9999	1.6315	0.4724	1.0852	-0.2921	0.0757	0.6268	1.2468	-1.4791	0.543	0.323	-0.3817	-0.7541	0.4742	-0.5307	0.4099	0.6722	0.0545	-1.5778	2.4044	1.9932	2.0517	0.3975	1.7123	0.873	0.5214	0.1871	0.9331	-0.9739	-0.775	-0.7135	0.4763	1.5558	1.1784	1.1011	1.1459	1.0388	1.3952	-0.6313	-1.7001	0.2065	0.8199	-0.4292
orf19.6913	GCN2	-0.8933	0.1094	-0.8937	-1.3904	0.4726	0.438	-0.266	0.734	0.8523	0.7433	1.1659	-0.7565	-0.672	1.6079	0.3384	0.3047	0.1756	-0.7355	-0.4099	1.223	0.0811	0.0014	0.1145	0.8175	0.6317	0.2566	0.5049	1.6233	0.4051	0.0299	1.0726	-0.2211	1.2089	0.9493	-0.8096	0.5001	-1.0091	-1.2571	-0.6747	-0.9821	0.6635	0.9312	0.3205	1.6938	0.7889	-0.7391	0.3001	-0.0506
orf19.5779	RNR1	1.0508	-0.9537	-0.4898	-0.1029	0.4712	-1.5192	-1.6648	0.0317	-1.6762	-0.1637	-0.6096	-2.2065	-1.543	0.6604	-0.783	-0.794	-0.6652	0.1134	-0.7259	-0.4925	0.2148	0.1563	0.5038	0.087	-0.8354	-1.2981	-0.5889	-0.4613	-0.7617	-1.1659	1.0996	1.1393	0.219	-1.6031	0.7214	0.9186	1.2964	1.0308	1.211	0.5567	-0.7674	-0.2739	0.7683	0.9521	-0.5645	-1.5564	-0.9588	-0.726
orf19.2084	CDH1	0.6368	1.7049	2.1394	1.7828	1.0253	1.113	1.1729	0.9029	1.1833	0.1684	0.7274	1.9156	3.223	0.6461	-0.2952	0.5673	-1.3229	0.003	-0.4496	-0.8324	0.6399	0.8964	0.6256	-1.5387	1.4418	1.3171	1.0941	0.9733	0.6975	0.6566	0.3122	2.1833	2.1742	-0.5218	2.7109	-2.7252	0.3874	0.7131	1.6105	0.2227	0.3825	1.1563	2.5047	-1.8673	0.5322	0.7448	1.1345	0.2356
orf19.3496	CHC1	-0.4704	0.915	0.6095	0.4147	-1.7331	-0.7489	0.3204	0.9549	0.6095	0.1483	0.3483	0.8288	1.795	1.5639	0.0112	-0.606	0.9759	1.7601	0.7618	1.1555	0.2813	0.359	0.6032	-1.6255	1.1101	1.2409	1.389	2.1993	0.2333	0.5173	-0.4561	0.3046	2.1102	1.2045	2.4564	-1.4074	0.5369	-0.3875	-0.8413	0.4611	0.0375	0.8626	-1.4536	1.1381	-0.7259	0.6559	0.8928	1.4493
orf19.7041	PTA1	0.3972	0.2935	-0.4186	-0.5662	-0.9197	-0.6303	0.0926	0.052	0.1154	-0.6515	0.1548	-0.5204	-0.3815	-1.0599	-0.5395	0.0014	0.142	-0.6897	0.5678	0.5452	-1.3711	-0.9187	-0.5284	-1.0729	0.8557	1.0224	0.7402	0.5804	-0.4739	-0.6751	0.8548	-1.5898	-0.9031	0.3289	1.3918	0.3604	1.1044	1.3862	0.7417	0.3634	-0.5534	-0.3319	0.6441	0.2257	-0.6207	0.4196	0.6062	0.3068
orf19.1251	BRN1	-0.8398	-0.0738	-1.3121	-1.6559	0.3673	-0.8088	0.4138	0.6838	-0.7512	2.8402	1.4113	-0.3596	0.2342	0.3045	3.3555	2.8674	0.5697	-0.0211	0.1619	0.0699	0.1119	0.1569	1.7863	1.8089	1.4455	2.0431	1.1557	-0.41	-0.3136	-0.4826	0.2521	-0.604	0.6552	0.3783	1.312	0.9567	-0.1116	0.7793	1.4799	2.7432	3.254	2.0923	-0.1868	0.1579	0.2874	0.1361	-0.3161	-1.1974
orf19.5901	PKC1	-1.3745	-1.5217	-0.9146	-0.4661	1.0317	-0.9655	-1.9505	-1.5727	-0.821	-1.6762	-1.5847	1.2494	-1.2755	0.7442	2.0568	2.8965	0.8056	1.8332	-0.9504	0.3262	1.8871	2.4576	0.2432	-0.4293	0.0185	0.0818	0.8458	-0.5722	-1.4966	-1.2428	0.6678	0.2627	-0.7156	0.8418	-0.7823	1.2683	1.8316	0.8391	1.2186	0.5967	-1.671	-1.2695	1.1893	-1.9458	-0.7059	-1.4305	-1.9257	-0.9707
orf19.6345	RPG1	0.6124	0.1798	0.6804	0.1047	0.4343	0.6186	0.3459	-0.1517	-0.2354	0.0007	0.0007	0.6464	-0.4674	0.0575	2.8316	1.3478	0.3975	2.7284	2.6293	2.8509	0.1623	-1.0858	1.5377	1.9249	-0.2065	0.8669	-1.1257	-1.257	0.1225	-0.9598	-1.5789	-0.2996	1.0705	-0.5658	0.9465	0.4453	0.1367	0.6384	0.7349	1.1057	1.0819	0.9679	-0.8321	0.2649	-1.6664	0.2607	1.3009	1.075
orf19.4616	POL30	0.7805	-0.3012	-1.2113	-0.4189	0.1323	0.0543	0.358	-0.9152	0.7258	2.6229	2.5285	-1.4142	0.2701	-1.5678	-0.5182	0.3607	0.6929	0.2864	0.8257	0.349	1.7237	-0.7977	1.1451	0.2374	0.7426	0.2812	0.1564	-1.4125	-0.444	0.562	-1.7043	-1.0464	-1.1717	-0.8874	1.3757	1.4386	1.1603	0.1404	0.692	0.5013	0.0506	0.5691	0.038	1.4627	0.402	0.1194	0.2697	0.3312
orf19.1672	COP1	-1.4965	-0.5032	-2.4403	-2.4373	1.1355	0.4599	0.7376	1.1485	-0.9531	-0.3506	0.1433	-1.05	-0.3478	0.1597	0.1755	0.9656	0.4973	1.7506	1.1823	1.7044	0.6508	0.4172	1.3917	0.7145	0.0408	-1.1917	-0.6715	1.3253	1.6705	2.0786	0.519	-0.743	2.156	0.6295	0.7872	0.4444	0.4441	-0.2314	0.1202	0.864	0.1248	-0.0642	-1.3305	1.6222	1.4596	1.6975	-1.2402	-1.8977
orf19.6074	FAP7	0.2883	0.6431	1.1401	1.2882	0.8526	2.2268	2.4321	1.0856	1.0477	1.4799	2.3083	1.272	1.1735	1.6332	0.2932	1.2197	1.5014	1.4158	1.3394	2.8763	1.1022	0.4071	0.6461	2.6394	1.9535	0.9146	0.6407	1.4239	2.7161	1.842	1.3123	0.4583	1.6758	0.0093	0.3531	-1.168	0.0843	0.6857	1.5206	-1.3925	3.0072	3.5136	-0.3664	-0.5016	0.0992	2.129	0.681	0.8576
orf19.6820		0.5371	1.4637	2.0099	2.4165	0.0558	1.1975	1.1118	1.6885	0.8326	0.9405	0.5704	1.2249	1.062	0.0219	0.4763	-0.6711	-0.1185	0.7206	0.273	0.4042	-0.7322	-0.4584	0.0576	-0.6279	1.0035	1.4211	1.8803	-1.8519	-0.4416	0.0586	1.6551	0.5412	2.3168	1.7661	-1.2899	0.2897	ND	ND	ND	2.1934	1.5897	1.1386	0.0776	1.8991	1.4285	1.1507	0.8681	0.262
orf19.5531	CDC37	0.565	0.4929	0.8794	0.2426	0.3392	-0.6022	-1.3617	0.8935	1.4631	0.0118	-1.1707	0.4199	0.3365	2.0832	-1.0122	-1.0233	-1.5278	0.6303	-0.5004	-0.9345	0.5324	0.868	0.1594	-0.9192	0.2559	-0.541	1.3656	-1.437	1.2306	0.302	-3.0814	0.8988	-1.3662	0.1994	1.3882	0.4374	0.2615	-0.9578	0.6717	-0.6941	-0.1928	1.7471	-0.7761	1.101	0.1375	0.0596	-0.8312	1.927
orf19.5947	SEC7	0.2906	-1.341	-0.7254	-0.8077	1.4206	-1.7664	-1.6042	-1.3736	-2.0201	1.4093	1.4279	1.5559	-0.4893	2.6011	0.3969	-0.5966	-0.9518	-1.2447	-1.7484	0.0501	0.8362	0.3473	0.4662	-0.164	-1.8298	-1.8867	-0.5501	-0.2895	0.9035	0.3607	1.6628	0.7305	1.0387	1.2989	-1.0955	0.0626	0.9261	1.0206	0.094	22.2603	16.0533	7.4352	0.0725	-1.2373	0.6239	-0.4076	-0.712	2.5221
orf19.6925	HTB1	ND	ND	ND	ND	ND	ND	ND	ND	ND	2.4153	1.3786	ND	ND	ND	0.0804	-0.4107	0.4755	0.0486	-1.5978	-1.1493	ND	ND	0.4278	-0.6347	ND	ND	ND	ND	ND	ND	ND	ND	ND	ND	ND	ND	ND	ND	ND	ND	ND	ND	ND	ND	ND	ND	0.0692	0.2965
orf19.2760	CFT1	-0.6285	-0.5653	-1.0918	1.689	-0.4518	-1.3814	0.3826	-1.6194	0.2106	0.0008	0.0008	0.4208	-0.4583	-0.5411	-0.8594	-0.4359	-0.9966	-1.2343	1.4152	0.8403	-0.7992	-0.7989	0.6137	-1.2784	-0.8296	0.4171	0.7019	-1.1258	0.5103	-0.8555	-0.7866	-0.9721	-1.2409	1.4869	-0.9459	0.0691	ND	ND	ND	0.7581	-1.0723	0.2902	0.3507	0.5877	0.1225	-0.8088	1.646	0.9161
orf19.5577		0.3642	0.572	-0.4756	-0.6303	0.2157	1.1739	0.6521	1.8828	0.52	-0.6872	-1.1175	0.5477	-0.4423	0.6247	0.8418	0.2879	1.6795	1.6672	1.2155	1.3459	2.8312	2.3302	0.9717	1.0887	-0.9243	-1.651	-1.1568	-0.494	-2.0071	-1.5848	2.1936	1.2936	1.3559	3.071	-1.0742	-1.899	2.5043	2.7123	2.3008	1.8735	-0.9342	-2.8723	0.528	0.1512	0.2948	0.2473	0.0834	-0.932
orf19.7529	EPL1	1.0553	0.9745	0.5962	0.5776	-0.8096	2.3182	1.3975	0.8108	0.6371	0.619	0.6384	2.0552	1.9512	0.1744	0.3136	-0.3697	0.4558	-0.4699	-0.5053	-0.3506	-0.6765	-0.1171	-1.0077	-0.2248	1.8352	1.1315	1.228	0.2658	0.2187	0.0271	0.1067	-0.3251	1.0901	1.2678	0.0077	-1.0325	0.4943	1.6083	0.8	0.2041	0.9739	1.188	0.7905	-0.8917	0.535	1.6301	0.4976	0.8083
orf19.2002	NIC96	ND	ND	ND	ND	ND	ND	ND	ND	ND	-0.2809	-0.6029	ND	ND	ND	0.1495	-0.3379	-0.8787	-1.4146	-0.8246	-0.5666	ND	ND	-0.4027	0.1231	ND	ND	ND	ND	ND	ND	ND	ND	ND	ND	ND	ND	ND	ND	ND	ND	ND	ND	ND	ND	ND	ND	0.2716	-1.6094
orf19.5117	OLE1	0.2873	-1.5793	0.0262	-0.9855	1.5152	-0.533	-1.4694	-0.6536	0.7171	0.747	1.8043	-1.8747	-1.6742	-1.1642	0.2799	0.099	0.4593	-0.372	0.3388	0.157	-0.7866	0.4211	0.5832	0.0814	0.1423	0.7141	0.1672	0.1217	0.516	0.3371	2.7068	0.4118	-0.6425	-2.6531	1.1587	1.149	0.8994	2.0691	2.4368	-0.6806	0.3535	-1.1673	0.0349	1.2545	-0.3979	-0.8572	-1.7333	0.476
orf19.4987	NUP49	0.9468	1.9984	0.9201	0.0244	3.2952	2.0227	1.3227	2.902	1.6096	-0.6983	-0.6621	0.8893	0.6276	-0.7869	-0.7517	-0.3056	0.0597	-0.8675	-1.4126	-1.2606	1.5003	0.9793	1.1056	0.3836	1.1889	0.5461	1.2974	0.8659	2.3767	1.3701	0.2088	0.1665	0.8076	0.5993	0.397	2.013	-2.6545	-0.468	-1.5679	1.5242	0.9263	-1.1457	1.4092	1.9449	2.9359	0.6535	0.824	-0.3904
orf19.3955	MES1	ND	ND	ND	ND	ND	ND	ND	ND	ND	1.6992	1.8824	ND	ND	ND	0.3229	0.3295	2.3019	2.1611	1.4394	1.743	ND	ND	0.0397	0.1566	ND	ND	ND	ND	ND	ND	ND	ND	ND	ND	ND	ND	ND	ND	ND	ND	ND	ND	ND	ND	ND	ND	0.5059	1.2939
orf19.6294	MYO1	1.3703	1.2488	2.022	2.0017	1.6105	0.3942	0.2751	1.1407	-0.4124	0.2104	-1.222	2.3368	0.952	1.8929	1.9635	-0.3644	-2.241	0.1688	-2.7219	0.3011	1.568	1.7836	0.5222	-1.2421	-1.6443	0.0697	0.6139	-0.2841	0.9854	0.7892	-1.1693	1.4082	0.6284	1.5505	-1.144	0.312	2.3453	3.2255	1.9203	3.1958	1.428	1.685	-0.0658	-1.3601	-0.6675	-0.8034	0.0014	-0.9505
orf19.4956	RPN1	-0.6011	-0.0927	0.1897	0.139	0.4679	0.9161	1.0923	0.3038	0.4025	1.3775	1.0091	0.5689	-1.0001	0.4555	2.5808	2.9805	-1.3051	-0.5429	-0.7367	-1.355	-0.873	-1.1897	1.5349	0.1705	-0.8759	-1.4012	-1.6627	0.1823	-0.8945	-1.305	0.1488	-0.8504	0.1393	-1.0817	-0.7104	1.0774	-0.0732	-0.8789	-0.7134	-0.7899	0.63	-0.8139	-1.6094	2.3794	-0.7377	0.0966	-1.0133	-2.7903
orf19.6099	CCT8	0.7235	1.4432	1.6288	2.6482	0.1717	3.1405	2.2511	1.1986	0.2506	0.4999	0.3058	0.9534	0.7964	0.3081	-1.9694	-1.8369	-1.1663	-0.6757	-1.016	-1.0858	-0.046	0.2235	-1.7635	-0.7188	2.3543	2.6877	2.8328	-0.7731	0.1436	-0.6101	0.0446	-0.47	1.1102	2.4987	0.0852	-0.8838	0.0838	-0.6049	-0.366	0.3527	-0.0247	-0.2443	0.604	-0.5686	-1.11	-0.4301	6.8635	2.5346
orf19.2712	HCA4	-0.6415	-0.4703	-0.4965	-0.1807	0.0193	-0.7581	-0.5406	-0.6483	0.3993	-0.6646	-1.1036	0.529	-1.101	-1.088	0.5768	-0.0812	-0.6186	-0.0793	-1.6872	-1.3897	-1.0209	0.1713	0.4604	-0.7654	0.0658	-0.4733	0.0322	-1.2843	-1.561	-0.8147	1.6298	0.0951	-1.5749	0.6109	1.4842	-1.4995	-1.3475	-0.8096	-0.9489	-0.8516	2.9379	1.3832	-1.2832	1.3637	0.0054	0.8211	0.4047	0.2197
orf19.5143	TIM54	-1.753	0.1712	1.1704	1.1287	-1.3426	0.793	0.6668	-1.4636	1.6262	0.3427	0.8038	-1.371	1.0254	-1.0522	-1.508	-0.8129	-1.624	-0.7117	0.6459	0.7544	0.124	-1.0136	-0.7141	-0.9826	0.1782	-0.5378	0.017	1.1429	0.5223	0.8799	-2.3219	-1.8433	0.7556	1.6026	0.68	0.9826	-1.7346	-1.2609	-1.8665	0.5711	-1.3832	0.1224	0.4184	1.1277	0.302	1.0264	1.3832	-1.24
orf19.7215	UTP10	0.6127	-0.1148	0.1285	0.3786	-1.0611	0.5765	0.401	-0.9621	-0.4806	0.4349	0.7254	1.4359	-0.2581	-0.5929	-0.2664	0.0443	-1.1618	-1.538	-0.5301	-0.7526	-0.6521	-1.1559	-0.4045	-0.5436	0.3453	0.4381	0.0366	0.0475	0.3813	0.1467	-0.973	-1.1172	0.4199	-0.8423	0.9237	0.1282	-0.6515	-1.5252	-1.5061	0.0273	-0.6663	0.195	-0.6163	1.4991	-1.2631	2.3075	1.1597	-1.0434
orf19.7291	GCD14	0.0054	0.2901	0.1599	0.4075	-1.0767	-1.32	0.0303	-1.0115	-2.0569	0.8929	0.7399	0.1655	-1.1958	0.4387	-0.74	-0.7924	0.2346	0.6935	0.7664	1.7232	0.0184	-0.5877	0.7109	0.19	0.6713	1.6853	0.5659	1.0048	-0.5932	0.3461	-2.1607	1.6815	-0.8519	-0.5871	0.4963	-0.819	-1.2186	0.3663	1.095	0.4115	0.2649	0.359	0.7169	1.2833	0.0392	1.5209	0.8155	0.3169
orf19.6422	SSY5	ND	ND	ND	ND	ND	ND	ND	ND	ND	-1.0715	-1.0349	ND	ND	ND	-0.9084	-2.0437	-1.5825	-0.7828	-0.4985	-1.41	ND	ND	-1.0282	-1.5153	ND	ND	ND	ND	ND	ND	ND	ND	ND	ND	ND	ND	ND	ND	ND	ND	ND	ND	ND	ND	ND	ND	-1.8073	-0.9393
orf19.1915	MPP10	0.8626	2.9831	2.0299	1.4392	-0.6978	1.6168	1.1547	1.7218	0.7645	0.3509	0.4862	-0.5734	1.5671	0.1262	-0.5865	0.0214	1.0404	0.3851	1.3855	1.1814	-0.1182	0.264	-0.1576	-0.8861	0.6862	0.4256	0.4058	0.9017	1.0726	1.031	0.4832	0.6548	0.7398	-0.9761	0.7537	1.755	0.1751	1.1159	0.19	-0.1196	1.0647	1.1101	0.3442	-0.8266	0.6082	-0.7606	0.9085	0.9426
orf19.819	ACP1	-0.6415	-0.5194	-2.0122	-2.3056	-0.5515	-1.8682	-2.2131	-0.7919	0.0191	-1.6451	-1.8643	-0.4577	0.3184	-0.678	-1.0553	-0.4285	0.113	0.1705	-0.2433	-1.0129	-1.1272	-0.4524	-0.079	-1.1803	0.1616	-0.4147	-0.2881	-0.8415	-1.3487	-1.2763	0.3984	0.1806	-0.9432	1.2588	0.3201	-1.0048	0.0731	-0.4772	-0.3767	1.1085	-0.3335	-0.6434	-0.4252	-0.3794	-0.5423	0.7806	-1.0808	-0.7573
orf19.4219	RIX7	-0.3071	0.6945	0.6293	0.5901	-0.3448	0.0058	-0.4802	-0.868	0.9444	-0.4076	-0.924	-1.0114	0.0846	0.2402	-0.0588	-0.6592	0.6782	-0.436	0.8625	0.3402	-0.9502	-1.2811	0.1089	-1.3699	0.4489	1.6439	0.8808	0.1124	-0.7966	-0.0885	-1.6542	-1.2168	-1.239	1.1736	-0.6545	0.8469	1.9581	0.9115	-1.0324	-0.0752	-1.2948	-1.4572	-1.4112	-0.5453	-0.3697	-1.6261	-0.9604	0.6147
orf19.6610	STU2	ND	ND	ND	ND	ND	ND	ND	ND	ND	0.054	2.2162	ND	ND	ND	-1.271	0.9026	0.2792	0.5539	1.1127	0.9855	ND	ND	0.1779	0.3311	ND	ND	ND	ND	ND	ND	ND	ND	ND	ND	ND	ND	ND	ND	ND	ND	ND	ND	ND	ND	ND	ND	1.2932	0.676
orf19.3087	RPS31	ND	ND	ND	ND	ND	ND	ND	ND	ND	2.0248	2.6788	ND	ND	ND	1.8721	1.4579	0.5386	0.6247	0.5663	0.5608	ND	ND	1.0258	1.12	ND	ND	ND	ND	ND	ND	ND	ND	ND	ND	ND	ND	ND	ND	ND	ND	ND	ND	ND	ND	ND	ND	-0.8731	-0.4429
orf19.3130	YLR243W	0.1581	-0.2729	-0.7755	-0.9846	-0.9721	-0.6249	-0.3457	-0.1488	-0.4009	0.0473	-0.5473	0.4977	0.0706	-1.0112	-1.0923	-0.4841	-2.3955	-2.6557	-1.3252	-1.6082	0.2867	0.2613	0.1829	-0.4252	-1.2742	-1.1116	-1.2994	-1.2076	-0.0566	0.0042	-1.0339	-1.3834	-0.8942	-1.2927	1.4523	0.3746	-1.2626	0.7646	0.3102	-1.2276	-1.1645	-1.431	-0.415	0.5928	0.5665	0.851	0.9076	-0.3169
orf19.4152	YEF3	-1.3435	0.0114	-1.9516	-2.277	-0.3696	-1.4991	-1.1806	-1.6747	-0.4447	0.6531	0.8166	0.768	1.7022	0.4641	-1.6079	-1.1036	2.0361	1.6175	2.5969	2.0651	0.2564	0.8178	-1.1294	-0.5811	-2.5209	-2.2713	-3.3079	0.5524	1.1211	1.5781	-0.5244	0.3605	0.7079	-1.302	1.0529	1.7481	-1.3979	-1.7361	-1.746	-1.4625	-0.9751	-0.3424	1.5277	1.8213	-0.5693	0.7763	0.7851	0.8826
orf19.5093	SFH1	-1.8751	0.1623	-2.5331	-3.1094	-0.4927	-2.4462	-2.9646	-0.3939	0.4709	-0.6775	-0.9199	-0.3834	0.8893	3.093	2.9393	3.5412	1.936	2	1.9802	1.0097	0.0311	0.2007	1.5719	0.3677	-2.1672	-2.417	-2.1201	1.6022	1.6114	1.6026	0.5903	0.6654	-0.8271	-0.3659	-0.8809	0.5509	-0.9169	0.1432	0.6126	-2.4834	-0.7708	-0.3229	0.4948	-0.6486	1.2041	0.2484	-0.5433	0.7682
orf19.6568	RHC18	2.5488	0.4518	0.4073	0.8619	-1.5276	0.8836	-0.7673	0.222	1.0493	0.3079	0.1505	0.7443	0.331	0.9715	-0.5958	-1.1155	0.8116	0.9621	-1.2167	1.0414	-0.9309	-0.4637	0.6963	0.3955	0.2738	2.1209	0.594	0.7262	0.6052	-1.2997	1.2153	1.0972	0.3292	1.7014	0.9964	1.5942	-2.0095	-1.7435	-2.9968	-1.0602	0.2243	0.4517	0.546	0.51	-1.5761	0.3609	-1.4249	0.1543
orf19.6818	YLR419W	0.1231	0.5571	1.0634	0.7803	0.0051	0.7339	-0.7604	0.8624	0.4366	-0.64	0.5285	1.3067	0.7677	-2.2488	-1.1536	0.1415	-0.3177	0.384	-0.2863	0.1915	0.1424	-0.753	-0.827	-0.7029	0.0907	-0.4245	0.5077	-1.6097	0.5835	0.7207	-1.8086	0.237	-0.6486	0.2145	2.2492	1.7148	-0.6207	-1.1462	0.72	0.1885	-0.3325	0.3833	-0.6047	0.5004	0.7328	1.61	1.2843	0.1125
orf19.4341	GAB1	-2.7002	-0.3765	0.1163	0.0473	-0.3661	-0.7335	0.1835	-0.3656	-0.9511	0.3176	0.0707	0.546	-0.893	0.0926	-0.3335	0.1849	-0.7312	0.014	-0.5128	-0.7424	-1.1826	-1.1275	0.2181	-1.5941	0.6721	1.0245	0.7692	ND	-1.4429	-2.4022	0.9641	-1.6374	-1.982	0.8075	0.8215	0.138	0.4452	-1.4919	0.2993	0.0599	-0.8653	-0.281	1.54	1.5067	1.9296	0.2787	-1.6974	-0.6739
orf19.3796	RNT1	0.4257	0.3219	0.8864	0.7444	0.9591	-1.1043	-0.8371	0.501	-0.8246	-0.812	0.0042	0.7291	-0.8121	1.951	-0.4774	-1.1642	0.0948	-0.2527	0.4597	-0.7939	-1.6399	-1.5412	0.4088	-0.9656	-1.4378	0.5627	-0.9118	-0.1252	-0.7958	0.1726	-1.9294	0.1766	-2.1441	0.3104	0.2683	-0.8357	1.092	1.1211	0.3064	0.488	-0.7511	0.4789	0.2714	0.1909	-0.9494	-0.61	-1.4119	-0.5671
orf19.1077	ATM1	ND	ND	ND	ND	ND	ND	ND	ND	ND	-1.0328	0.1865	ND	ND	ND	-0.5907	0.0164	-0.7826	-1.853	0.4583	1.1884	ND	ND	-0.5559	0.4612	ND	ND	ND	ND	ND	ND	ND	ND	ND	ND	ND	ND	ND	ND	ND	ND	ND	ND	ND	ND	ND	ND	0.6091	0.5616
orf19.2873	TOP2	0.1211	0.3602	-0.4559	-0.3933	-1.544	0.8741	0.7676	-0.2509	0.5592	0.7367	0.6874	1.3145	0.399	-1.8643	-1.1785	0.2314	-1.0393	-1.9986	0.9977	1.8151	-0.6484	-0.8748	-0.4666	0.2238	-0.3654	-0.6652	-0.9366	0.1282	0.26	-0.1303	-1.358	-1.1385	0.8043	0.8597	1.0781	0.5532	-1.096	-0.5134	0.1184	-0.5449	-0.3618	0.4821	-0.8387	1.0647	1.0419	2.6204	0.5297	-0.8099
orf19.4451	RIA1	-2.2274	-1.6611	-1.3065	-0.6604	0.3467	-2.1984	-3.1001	-0.9388	0.8832	-0.9181	-1.6355	0.2781	-1.5601	-1.4461	-1.2197	-0.1542	0.2726	0.102	-0.4114	-0.4361	0.0245	0.8419	1.5162	-0.6488	-2.5213	0.0586	2.1216	-1.9091	-3.0777	-2.4888	1.9126	1.3562	-3.1022	-3.2751	0.7385	-2.2287	-0.686	0.3859	0.6006	-1.9202	-1.4842	0.42	0.6815	-0.5945	1.5143	-1.251	-0.9301	0.2961
orf19.3704	DBP6	ND	ND	ND	ND	ND	ND	ND	ND	ND	0.0008	0.0008	ND	ND	ND	-1.2035	0.1431	-0.482	0.2096	-0.764	0.0223	ND	ND	-0.7814	-0.5769	ND	ND	ND	ND	ND	ND	ND	ND	ND	ND	ND	ND	ND	ND	ND	ND	ND	ND	ND	ND	ND	ND	0.3216	-1.0991
orf19.5221		-0.6187	-1.0921	-1.1847	-0.5925	0.2944	0.4367	0.1982	1.6172	0.8589	1.1573	1.0997	0.2475	-0.2963	-1.4055	0.3981	0.5952	2.3016	1.2456	2.1446	1.5299	0.3463	0.6859	1.3094	0.2416	-1.0116	-1.052	0.0293	0.9479	-0.4553	-0.6735	-1.793	0.1777	-1.8641	ND	ND	0.2149	ND	1.6633	-1.3322	0.8493	0.7633	0.3861	0.0453	1.7103	-0.4302	0.5429	0.9862	1.1579
orf19.5226	WRS1	0.042	-0.8129	-0.8594	-0.3624	1.5724	-0.6291	0.0824	-0.9848	0.0202	-0.5943	0.031	-0.9662	0.2588	0.5053	-0.9293	0.0628	2.7657	0.2452	0.7278	1.0411	1.7106	1.7373	1.8366	1.7596	0.3462	0.3956	-0.8221	-1.3531	-0.9419	-0.4182	1.6107	0.7365	-0.9296	-1.1505	1.8857	1.3094	0.6018	-2.0381	0.7938	0.338	-0.8092	-0.2341	1.2401	1.2546	-0.3739	0.0501	-0.3618	1.4189
orf19.1110	THI80	-1.3584	-1.0141	-0.2744	0.0611	-1.0617	0.046	0.5091	1.3121	0.5258	-0.6354	-0.8799	1.2854	0.6353	0.2114	-1.1209	1.0258	-1.952	-0.5722	1.3241	-0.6152	0.2807	0.8754	0.1872	-0.6749	0.6936	0.5726	0.7077	0.1338	-1.0783	0.4597	-1.7044	0.1152	-2.0676	-2.1229	1.4386	-0.9162	0.405	0.4461	0.7637	-0.8847	-0.8486	-0.753	1.9511	1.7007	-1.8372	0.4607	0.2209	-0.9289
orf19.481	GCD1	0.2724	0.2649	0.0174	0.1531	1.0468	0.7809	-1.3402	-0.7992	0.4852	0.0007	0.0007	-1.3673	-2.9957	0.9086	-0.7806	-0.304	0.4704	0.2038	0.6128	0.8585	-0.736	-0.5873	0.8513	-0.5963	0.7372	0.4637	0.2174	0.0878	-2.2157	0.4339	-1.6401	-0.3579	-1.1713	-0.7318	ND	-1.539	ND	2.304	ND	-1.0967	0.6452	-3.1887	-0.7222	0.3121	1.0278	0.1267	-1.3933	-1.3307
orf19.1591	ERG10	ND	0.0397	-0.6952	ND	-1.659	-1.1903	0.6953	-1.6579	-0.9063	0.0008	0.0008	2.1212	2.0062	-1.9928	0.6933	0.1028	2.4914	0.7946	0.2492	0.4769	0.0549	-1.0082	-0.2559	0.3783	0.1006	-1.3048	-1.0257	1.2865	0.9554	1.5711	-1.5959	0.9013	1.0935	-0.524	2.455	0.4739	0.1655	ND	-1.8498	0.172	-0.2868	0.6617	0.918	0.5584	ND	-1.5921	0.4422	-0.311
orf19.6936	RAD53	0.4045	-0.163	-0.2966	-0.5317	-0.6764	-1.4615	-1.2329	-0.9389	0.6934	-0.407	-1.1266	-0.966	-0.9385	-0.7987	-1.5998	-1.6628	0.1648	0.5627	0.396	0.2562	-0.5405	-0.7212	-0.3987	-1.3185	-1.2746	-1.2852	-1.4411	-1.1746	-1.364	-1.1048	0.308	-1.0885	-1.0897	0.0181	-1.518	0.2194	-0.514	0.7443	0.4139	-0.106	-0.4912	-0.5421	0.3902	-0.5374	-0.09	0.3996	-0.7495	-0.4438
orf19.5516	SRP72	0.8529	-0.5084	-0.5487	0.278	0.4011	0.298	0.6399	0.0023	0.3815	0.0188	0.0007	-1.1994	-1.6312	-3.1322	0.0436	1.1252	0.5865	0.7222	0.9669	0.496	0.3083	0.4157	-0.5046	-0.6999	0.1722	0.2517	-1.2611	-0.7986	0.8675	0.6368	0.5104	-2.7873	-1.9242	0.9901	1.0627	1.1141	0.7716	1.1339	0.2852	0.0002	-1.4977	-0.8133	0.7745	1.4585	0.1364	0.5497	0.1312	1.1955
orf19.2504	BMS1	0.4563	1.0818	0.5276	0.3928	0.3281	0.7731	0.8001	-0.1245	0.3166	1.0937	0.9984	-0.565	1.004	-1.8877	0.1091	0.6675	1.0328	-0.4113	0.6335	-1.5757	-1.264	-1.4969	0.4972	-0.2412	0.2376	0.1682	-0.9746	-0.7694	0.1746	0.4178	0.0773	-1.2854	-1.4032	0.8641	0.446	-0.7354	-0.5432	-0.565	-1.0722	0.4123	0.0945	-0.5405	-0.8399	1.0172	0.7838	1.1741	2.3113	1.2343
orf19.7062	RPA135	0.2623	0.296	-0.1458	0.2595	0.5824	0.7896	1.0434	0.0893	0.5712	1.3366	0.9072	0.9854	-0.7915	-1.6674	-1.6081	-0.363	-0.7583	-0.5611	0.3667	0.1689	-1.0443	-0.5705	0.8185	-0.3114	0.9117	0.9931	0.5633	-0.8967	0.0563	-0.8559	0.2316	-1.8273	-1.2504	0.8686	0.6309	0.0188	-0.6828	0.1787	-1.4782	0.234	0.7009	1.6629	0.0934	1.15	0.4707	0.837	2.0963	1.4408
orf19.1902	NOC4	0.4574	-0.2943	0.433	-0.223	1.4851	0.8993	0.4462	-1.9371	0.3576	-0.5892	0.8465	0.5451	-1.5743	-1.4982	-1.4676	-2.3651	0.5379	0.1551	0.0367	0.7193	-0.4231	-0.0356	-0.9556	0.1679	1.8894	0.1387	0.2758	0.6309	0.0974	0.2163	0.6636	0.6469	0.7337	0.8665	2.4645	-2.3456	-2.023	-3.4128	0.1916	-0.8452	-0.5839	-0.3	0.3035	-0.88	-1.4894	-2.7301	-0.1894	1.1254
orf19.4746	JIP5	-0.6605	-1.3602	-1.6756	-0.9794	1.11	0.3826	-0.5732	-0.1527	0.0308	-0.462	-0.7624	-0.8821	-0.7364	-1.1662	-1.1644	-0.6967	0.1085	0.9266	1.5321	-1.3776	-1.8216	-1.7315	0.4913	0.4733	-0.5748	-0.7553	-0.7431	0.5342	0.0458	-0.7405	0.2901	-0.4822	-0.4535	0.6428	0.4898	-1.0848	0.435	1.0487	1.4385	0.6894	-0.6292	0.068	0.3955	1.2008	-0.7044	-1.5258	-0.7203	0.24
orf19.7655	RPO21	-0.14	0.1697	-1.6028	-1.6489	0.5139	-0.4451	-0.7732	0.1735	0.081	-0.2053	-0.5131	-1.6611	-1.0938	0.1132	0.4681	-1.181	0.7857	0.0279	0.7083	0.5621	2.3069	2.1862	-1.2471	0.1136	-0.2583	-0.9653	-2.4978	0.7043	0.7923	1.3772	0.595	1.1401	1.3869	0.1602	0.0082	-1.7604	ND	-1.0374	-1.3741	-0.963	-1.0158	-2.2418	1.2947	1.0231	0.2773	0.3795	-0.6785	-1.8845
orf19.3451	TRA1	0.6535	1.4192	1.2621	0.9405	1.3585	1.0371	1.0907	0.5463	0.1104	0.1643	0.0165	-0.1196	-0.0779	0.6272	-0.3972	-1.6351	0.4334	1.0982	-1.0375	0.621	0.3148	0.4492	0.7536	-0.9071	1.3758	0.5602	0.6317	0.3687	0.6957	0.5425	0.6176	0.1813	0.1642	ND	1.4209	0.7501	0.9958	2.0468	0.9389	0.4232	0.7729	0.795	-0.6461	0.357	ND	0.1868	0.8172	-1.533
orf19.4697	MDN1	ND	ND	ND	ND	ND	ND	ND	ND	ND	0.0008	0.0008	ND	ND	ND	0.2573	-0.2882	-0.4788	0.6994	0.5808	-0.8209	ND	ND	0.7825	-0.8807	ND	ND	ND	ND	ND	ND	ND	ND	ND	ND	ND	ND	ND	ND	ND	ND	ND	ND	ND	ND	ND	ND	0.4388	0.2814
orf19.2365	POL2	ND	ND	ND	ND	ND	ND	ND	ND	ND	0.5364	0.3311	ND	ND	ND	-0.9886	-0.4898	0.5703	-1.081	0.3053	0.2688	ND	ND	0.5212	-0.353	ND	ND	ND	ND	ND	ND	ND	ND	ND	ND	ND	ND	ND	ND	ND	ND	ND	ND	ND	ND	ND	ND	0.1077	0.4437
orf19.5148	CYR1	0.5243	0.729	0.8642	0.9962	-0.567	0.9551	0.6447	0.2434	0.9884	0.6358	0.3011	-0.7864	0.2422	-0.4874	-1.2907	-0.8608	-0.595	0.7284	0.2145	-0.3164	-0.7594	-0.5138	0.3914	-0.7905	1.1444	1.12	0.6597	-1.3248	0.3124	0.0438	-1.0563	-1.3679	0.4632	-1.2947	0.9058	-0.4975	1.1978	2.0228	1.5393	0.6997	0.4764	0.4177	-0.4536	-0.3103	-0.1076	0.9074	0.6102	0.3409
orf19.5991	DBP10	0.6506	-0.1047	-1.5471	-0.9583	-1.7625	0.2163	0.3046	1.0723	0.2468	0.0007	0.0008	0.9769	0.6008	-1.0701	-0.9145	-0.7925	0.4888	0.115	0.234	-0.4591	0.7536	-0.7175	0.1767	-0.6807	2.8393	-1.1295	1.0919	0.9971	0.9806	1.2171	1.3956	0.5394	0.599	0.7733	1.5716	0.082	3.7082	-1.2742	-1.7063	-2.0817	-1.3783	0.0071	0.0233	1.4557	-1.4609	1.3582	-0.7603	-0.9867
orf19.418	KOG1	-0.5751	-0.8106	-0.1851	0.1095	0.1796	-1.4534	-1.2236	-1.1043	-1.2388	0.0007	0.0007	-1.3642	-1.2123	-1.7295	-0.5282	-0.9298	-0.2954	-1.0588	-0.4999	-0.7901	-1.3404	-1.1441	0.1709	-1.0123	-0.4009	-0.2776	0.4843	-1.0075	0.6387	0.3731	-0.9574	-1.6388	-1.9351	0.2067	0.685	-0.586	1.1478	2.2057	0.9646	0.0578	-0.8822	-0.484	0.0046	0.0884	-1.4342	0.264	0.2415	-0.4027
orf19.6034	TUB2	-1.5099	-0.273	-0.6372	-0.8066	0.0088	0.5614	0.5466	0.401	-0.5293	-0.2333	0.2023	0.2654	-0.5068	0.778	0.464	1.4097	1.7609	2.238	1.2122	2.2791	2.304	2.3693	2.3329	1.7103	-0.8037	0.7399	-0.8431	-0.6989	-0.435	0.0217	-0.5332	-0.2999	0.223	0.4288	0.9162	-0.7813	-3.556	-1.3683	-1.0715	-1.5029	-0.6655	-1.7947	2.6864	1.86	-1.0993	0.236	1.0052	-0.9262
orf19.7384	NOG1	-0.5263	-0.2779	-0.189	-0.5192	-1.1804	0.872	0.1041	-0.6287	-0.7991	0.3035	0.1196	0.1794	0.2342	-0.2723	-0.7918	-0.92	-1.6856	-1.3941	-2.1178	-1.8604	-0.543	-1.0559	-0.5859	0.2042	1.1925	0.5504	0.3809	-1.3727	0.292	-0.8656	2.4469	0.6498	0.7356	0.4505	0.0953	0.683	-2.1369	-1.9515	-2.5656	-0.5869	-0.3875	-1.428	-2.1217	0.5161	-0.9098	-1.4214	0.0852	-0.2409
orf19.1738	UGP1	0.7582	-0.6917	0.1802	0.082	-0.3281	-1.7247	-0.8303	-1.4971	-1.0194	0.1197	0.1336	-0.7127	-0.3775	1.9536	-0.8107	-1.8281	0.5721	-1.3805	1.1078	0.7194	0.007	-1.2177	-1.1382	-2.3743	-1.8277	1.6325	0.0767	-0.4401	-0.4984	-0.5855	0.5293	1.0403	-0.3797	0.4847	0.912	ND	0.0305	0.0436	0.0137	-0.7981	-0.6081	0.3826	-1.3921	0.0089	1.1423	0.8255	-0.9535	-0.3319
orf19.2629	USO1	ND	ND	ND	ND	ND	ND	ND	ND	ND	0.9489	0.1521	ND	ND	ND	0.8677	1.3212	-0.83	0.8303	0.5796	1.4745	ND	ND	0.2791	-0.1737	ND	ND	ND	ND	ND	ND	ND	ND	ND	ND	ND	ND	ND	ND	ND	ND	ND	ND	ND	ND	ND	ND	-0.4317	0.9065
orf19.3341	YDR341C	0.9911	0.7907	0.8362	2.1285	0.7862	0.938	0.4275	0.0615	0.7249	0.1671	0.662	0.3769	0.3121	-1.5833	-1.3089	-0.7084	-0.3981	1.4978	0.2855	1.3398	-1.2013	-0.9032	0.2459	0.1939	1.7537	1.6099	1.5812	-1.0311	0.3795	0.3748	-1.9346	-1.7922	0.1134	-0.612	0.4144	1.8535	ND	0.906	1.826	1.3985	0.6336	1.333	1.5981	0.4224	-2.4408	1.0646	0.8653	-0.3326
orf19.1229	CSE1	-0.3866	0.1047	0.3132	0.0414	0.2548	0.0705	-1.5605	-1.4201	-0.8509	0.0008	0.0008	0.1399	-0.6455	1.2893	1.101	-0.1871	-0.5891	-0.5632	0.0089	-1.131	0.5791	0.6657	0.1843	0.4574	0.1687	0.6122	0.7447	-0.341	1.3942	0.1712	1.2004	1.1803	0.9247	0.0985	-1.1558	ND	0.2852	-1.4366	1.0265	-0.3652	0.5138	-3.7097	1.7056	-0.5132	2.6364	0.2955	-0.2766	0.2505
orf19.4192	CDC14	0.093	0.431	0.3086	0.3525	-0.7596	0.9927	0.7986	0.5834	-0.8409	2.1454	1.0536	0.507	-0.3954	-1.5138	0.6453	0.437	0.4982	-0.4901	0.1863	-0.0897	-1.313	-0.9956	0.8846	0.3864	0.4672	0.6881	-0.5429	0.6538	0.6076	0.3683	-1.1804	-1.1617	-1.268	0.7087	0.2579	0.4883	-0.3247	0.5122	0.4297	0.0369	0.0048	0.6879	0.4377	0.1284	-0.2566	0.273	1.2407	1.5475
orf19.6926	CDC25	-0.8052	-0.5094	0.205	0.6739	0.9534	1.3469	-1.4329	-1.1725	-2.2282	0.0008	0.0008	0.3891	-1.0311	1.1324	-0.6254	-0.4799	-0.5228	0.3862	-1.1127	1.0347	-0.9217	-0.3795	-2.276	0.2527	1.0259	0.4558	1.9182	-1.1259	-1.6957	-1.4124	0.962	-0.824	0.0122	1.9618	-1.6154	-0.4382	1.6735	1.2527	0.1808	0.4818	-0.6084	0.1894	0.2667	-1.3365	0.5511	0.4173	0.0297	1.1826
orf19.6046	APC1	-0.6986	0.1822	0.2571	-1.4576	-1.8149	-0.7227	-1.1989	0.8337	-0.1091	-0.8971	-0.455	0.5478	0.0202	0.1267	-0.8298	0.3061	1.4027	1.4321	0.8084	0.8343	2.1018	2.3128	-0.333	-0.3339	0.6488	0.7555	0.6384	0.0092	0.3634	0.492	-1.1146	-0.1445	0.3477	0.2431	1.043	0.3366	-2.0881	-0.6881	0.1993	0.52	-0.8495	-0.7836	0.925	1.0228	1.5726	1.0563	0.7935	0.2507
orf19.2216	PDS5	0.9136	-0.6311	0.0069	0.2513	-0.3278	-1.5807	-0.8525	-1.5465	0.083	-0.8742	-1.3338	-1.5368	-2.3394	-1.3645	-1.1441	-0.9785	-0.4081	0.5087	-0.8528	0.3024	-1.3221	-1.0148	0.9618	-0.4803	0.4116	0.004	-0.4852	0.7352	-0.3282	-0.5023	0.1837	-1.4782	-1.9586	0.1105	1.5127	0.3253	1.81	2.6262	1.8808	0.8433	-0.9594	-0.1537	1.8193	-0.8985	-0.9081	1.4855	-0.4978	-0.9375
orf19.3129	RVB1	-0.6286	0.223	-0.2781	-0.7532	-1.334	-0.8123	-0.854	-0.2704	0.1521	-1.0344	-1.7793	0.2236	0.2407	-0.9867	-1.2967	-1.0449	-1.0395	-2.5759	-0.3864	0.0112	-0.1979	-0.3092	-1.5484	0.7664	-0.5371	-1.2885	-1.2568	-0.4742	-0.4903	-0.6514	1.2301	1.645	0.6266	0.2207	-1.4016	-0.594	-0.88	-0.5122	-0.2334	0.5386	0.325	-0.3492	-1.1166	-0.5999	-0.7966	-2.1477	0.6608	0.3184
orf19.5597	POL5	ND	ND	ND	ND	ND	ND	ND	ND	ND	0.0008	0.0008	ND	ND	ND	-0.3301	-0.6133	2.0792	1.0807	0.5811	-1.4439	ND	ND	0.7145	-1.0041	ND	ND	ND	ND	ND	ND	ND	ND	ND	ND	ND	ND	ND	ND	ND	ND	ND	ND	ND	ND	ND	ND	1.9476	0.1037
orf19.3058	COQ6	-1.2825	-1.3938	-0.8448	-0.8836	1.89	0.355	0.9565	-0.7617	-1.3816	2.3132	3.2187	-2.0668	-0.9679	-1.7523	0.0403	0.4993	0.8343	-0.3588	0.1305	1.0754	-0.9651	-1.6238	1.9759	1.3644	0.401	-1.0352	-0.5793	-2.4106	-1.3083	-0.3755	0.4093	-1.0786	-0.7884	1.3455	0.7262	1.0014	1.4075	1.3386	0.2791	1.4434	2.6012	2.7468	1.2176	1.1715	-0.6515	-0.6867	0.9225	2.3264
orf19.4490	RPL17B	1.0587	-0.4504	-1.2961	-0.7862	-2.5803	-2.2893	0.0337	-0.4815	-0.2963	0.0008	0.0008	-2.615	-1.6721	0.4327	0.4105	-1.5982	0.3202	-1.2176	0.8044	0.5968	-1.701	0.0854	-0.527	0.0676	-1.8435	0.345	-0.9605	0.5063	-0.514	-0.3692	0.6022	0.6391	0.2885	-0.7531	-1.4837	0.228	-2.2994	-1.0249	ND	0.9122	-0.7298	-1.8783	-0.8945	0.5695	1.4821	-0.9117	0.1119	-0.4936
orf19.2167	RRP14	-0.2986	-1.288	-0.8455	-0.7026	0.4458	-0.4479	-0.4383	0.3807	0.2197	0.2139	0.719	-1.0944	0.1386	-1.5087	-0.3234	-1.0542	0.6683	1.0215	0.706	0.1782	-1.5389	-1.3404	0.8091	-0.7822	-0.9179	0.0348	0.2543	-0.9581	-0.4922	-0.9908	0.2468	-2.6696	-0.416	0.8153	1.5808	-0.3608	0.7659	0.6677	0.3696	-0.5695	-0.5442	0.3881	0.3154	0.7239	-0.5624	-0.7086	0.0924	1.1403
orf19.6356	PRP6	1.0984	0.044	-3.1147	-3.0114	-2.2884	-0.9285	-0.4031	0.4751	0.3386	0.4066	0.0892	-0.3859	0.6262	-1.5665	-0.3479	-1.3017	-1.9472	-1.4159	-1.5393	-1.3019	0.2838	0.8817	-1.2445	-2.089	3.2595	2.9206	2.9124	-1.4259	-1.1615	-1.8671	0.0234	-2.5051	0.2136	0.9636	1.3839	-0.2783	0.6163	0.9862	-0.8138	0.2669	-1.0151	-1.6084	-1.1241	0.5399	-0.3473	-0.5962	0.8952	0.759
orf19.3055	SRB4	0.164	-1.2135	-1.596	-0.4012	-1.1388	-1.0888	-0.7367	-0.9637	-1.0916	1.6465	0.6205	-1.5545	-1.2755	-1.856	-0.5676	-1.6307	0.2977	-1.348	-0.3337	-1.8292	-1.2489	-1.563	0.7985	-0.5718	0.3498	-1.8434	-0.8685	-0.5642	0.2871	0.1256	1.4706	-1.5034	-1.659	0.993	1.0419	-1.4745	0.6179	-0.8157	-1.1493	0.1642	0.8967	0.4508	0.6255	0.1697	-0.9189	0.264	0.1334	0.7786
orf19.2778	URB1	-0.6307	-1.1834	-1.2409	-0.969	0.1546	0.2796	-0.6508	-0.6623	0.4982	-1.0765	0.3692	-1.1062	0.0225	-1.2631	0.1097	0.0274	0.1968	0.3144	0.1844	1.8693	-0.847	-1.1942	0.235	1.2155	0.2941	-1.0355	0.4957	-1.261	-1.1599	0.2911	1.5183	0.1058	-0.8122	2.2182	0.6364	0.1564	-0.9363	0.1408	0.1164	-1.2553	-0.8128	-0.1654	-1.5639	1.4392	1.1866	1.27	-0.6347	0.4811
orf19.3301	MET30	0.0513	0.7614	1.0524	0.1164	0.3511	0.8816	0.1886	0.6694	1.9103	0.0007	0.0007	-0.5736	-1.0443	0.4417	-1.6103	-1.1432	1.6286	0.2225	0.3605	0.9378	1.4613	0.0837	-0.9858	-0.89	0.4716	-1.7608	0.3648	0.1496	1.177	1.0016	-1.0639	1.107	1.8252	0.164	0.029	1.7529	1.1804	0.0238	2.0856	1.3692	0.4742	-2.1625	1.2282	0.5775	-1.0644	0.99	1.9656	0.8778
orf19.6559	YNL108C	1.3109	0.6937	1.2959	1.223	0.2797	-0.8459	-1.207	0.3558	-1.3139	0.5092	0.2907	0.5475	0.9029	1.4052	1.2956	1.3734	1.1554	1.6614	0.0587	0.8418	-0.7685	0.583	0.3755	-0.4338	-1.5645	1.3826	0.1992	-1.0132	-0.9606	-0.7818	0.408	-1.009	0.2061	0.5052	0.6888	0.9763	1.508	0.4605	1.3382	1.5165	-0.3949	0.53	1.3121	0.0453	-0.7407	-0.8063	0.0603	-1.6792
orf19.6026	ERG2	0.8765	0.6556	0.7709	0.5336	0.1704	0.995	1.2908	-0.3656	0.2918	1.9873	1.6068	0.9601	0.2419	0.8369	2.916	5.5208	-1.0135	0.2524	-0.4315	-0.5883	-0.8349	-0.6348	2.1119	2.5861	0.3592	0.2894	0.0467	0.0251	0.7191	0.6282	-1.2401	-1.2218	0.0413	-1.0006	0.6254	-0.1834	1.0893	1.0874	1.1149	1.1932	0.9324	1.0428	-0.3391	0.0133	0.34	1.0378	1.0101	1.0061
orf19.767	ERG3	ND	ND	ND	ND	ND	ND	ND	ND	ND	0.5556	0.7121	ND	ND	ND	-1.6316	-1.6763	-0.3118	1.6836	-2.1902	1.0497	ND	ND	1.1206	0.222	ND	ND	ND	ND	ND	ND	ND	ND	ND	ND	ND	ND	ND	ND	ND	ND	ND	ND	ND	ND	ND	ND	-1.2775	0.5683
orf19.5178	ERG5	0.5446	2.0441	1.6663	1.4424	-4.5592	0.1257	0.522	0.2149	0.1631	0.0007	0.0007	1.8167	0.7224	1.5076	1.365	1.3408	0.2384	-0.7579	-1.2628	-1.2553	-0.4773	0.091	0.9244	0.2486	0.2154	1.0194	0.9865	0.1007	1.6374	0.5449	0.4554	0.7626	-0.9629	0.9282	2.1359	1.4042	0.9162	0.6014	2.619	1.5684	ND	3.3244	0.1025	1.0599	-2.288	0.4736	0.9196	0.8864
orf19.1631	ERG6	0.0616	-0.2811	-4.0837	-3.9457	-0.1961	-2.3121	-1.6197	0.6034	0.6276	1.0092	1.1893	-0.6053	-1.3313	0.5946	0.9205	1.0192	0.2793	-0.2595	-0.8281	-1.6935	-1.2417	0.1419	1.578	-0.3806	-2.5481	-1.9884	-2.5249	1.2874	-0.6867	-0.4056	0.1894	-1.4518	-2.4039	-0.9282	-1.2467	-0.7533	0.8184	0.2923	1.3256	0.1344	-0.6898	0.1931	-0.8683	-0.4587	-1.6784	-0.5815	-0.4657	0.5268
orf19.1598	ERG24	-2.4087	0.4742	0.6306	1.1835	0.994	0.1414	1.9683	-0.4706	-1.191	1.16	1.2327	1.8491	0.539	10.1962	13.5312	9.0485	-0.5275	-0.3673	-1.4768	-0.82	0.5649	0.9653	1.0699	1.6549	0.1701	0.5896	0.5152	0.8308	0.9576	1.4023	1.6821	1.4623	0.6433	-1.4077	-1.9621	1.1349	-0.8093	0.1405	-0.1584	0.7819	0.984	1.6412	-1.7209	-0.7697	-1.9492	0.146	0.4497	1.1985
orf19.1031	HMG2	-0.6125	-1.7658	-1.3111	-0.432	0.9244	0.2114	-1.5233	-1.7871	0.7041	0.3938	0.2232	2.8973	3.7088	2.8079	4.3876	4.2376	1.2714	0.0673	0.352	0.3603	-1.3304	-1.7879	0.6733	1.1362	-1.7148	-2.1579	-2.4377	2.4373	2.3608	2.2364	2.2191	-1.5707	0.2775	-0.4722	1.9979	2.1551	-0.4726	-0.2789	0.7564	-1.2384	0.559	1.1984	0.9294	0.8787	1.5555	-0.5694	-0.1555	0.9703
orf19.6199	HCS1	2.745	-1.165	-0.9881	-0.5264	0.4657	-0.572	0.6793	-1.2789	-1.3266	0.106	1.4248	0.1976	-1.3556	0.7803	1.496	0.2982	0.8498	0.346	0.102	0.0599	-1.7988	-2.0629	0.8717	0.4798	-0.7326	0.0431	-0.6487	0.0343	-1.2407	-0.6297	1.4799	-1.2573	-0.8164	0.9724	1.5164	3.0678	-1.2831	0.7148	0.8871	-1.9356	-1.3454	0.4538	-0.6385	-2.9167	1.2392	-0.3194	-0.4868	0.578
orf19.687.1	RPL25	ND	ND	ND	ND	ND	ND	ND	ND	ND	0.0008	0.0008	ND	ND	ND	-1.4141	-0.318	0.9803	0.1744	0.0874	0.1201	ND	ND	-1.2959	1.1987	ND	ND	ND	ND	ND	ND	ND	ND	ND	ND	ND	ND	ND	ND	ND	ND	ND	ND	ND	ND	ND	ND	0.5809	-1.3662
orf19.1649	RNA1	1.0443	0.392	-1.6591	-2.3014	-1.2551	1.4764	0.1402	0.6936	-2.5109	0.6825	0.6855	1.3483	0.8701	2.1742	0.213	0.3579	1.407	0.9125	0.6638	1.4518	0.9785	0.4931	0.0312	0.2603	1.389	0.3193	-1.7882	2.2386	1.3628	1.1141	0.9466	0.7102	1.0157	0.6793	2.5908	2.6982	-1.1595	-0.9435	1.3448	ND	3.7466	1.2952	0.9054	0.1682	1.1368	-0.7589	-0.6809	-2.7342
orf19.7232		ND	ND	ND	ND	ND	ND	ND	ND	ND	0.0008	0.0008	ND	ND	ND	0.1256	0.5549	2.1145	0.1312	-1.1114	1.7894	ND	ND	-1.1082	0.1652	ND	ND	ND	ND	ND	ND	ND	ND	ND	ND	ND	ND	ND	ND	ND	ND	ND	ND	ND	ND	ND	ND	1.3365	-0.2111
orf19.4346	SEC16	0.2261	0.574	1.8271	0.7745	0.5498	0.6486	0.063	0.2319	0.043	1.2119	1.1991	0.0826	-0.238	0.4322	1.793	0.4111	-2.0106	0.5434	-1.4308	-0.993	0.4448	-2.004	0.0514	0.1504	-0.7564	-0.6895	-0.86	1.1982	-0.8764	0.618	0.4734	0.6023	-1.2375	-1.8155	-1.7944	3.5773	0.1307	-1.0761	-1.5862	1.2618	0.2092	0.1108	-1.4625	-1.2677	-1.5193	-2.8076	0.0037	0.5078
orf19.3996	GPI10	0.7252	1.3682	0.973	0.9363	-1.5369	0.6435	1.041	0.3613	1.2706	0.0407	0.92	0.1395	1.2865	-1.1026	0.0252	-0.0173	0.3963	0.3659	-0.2368	1.8239	-0.59	-0.065	0.5501	-0.4459	1.0699	0.6426	0.5378	0.5209	1.3821	0.5343	-1.3333	-0.3115	-0.1894	0.0798	1.196	0.5292	0.2289	1.5752	1.8287	0.2013	0.1939	0.2941	-1.3138	0.3709	1.0353	0.3955	0.7609	-1.554
orf19.4015	GPA1	0.2959	0.8379	0.1854	0.2124	-3.6254	2.5735	1.9315	-1.5437	0.5986	1.464	2.9305	3.9402	0.14	-2.7115	-0.8834	1.1752	1.2082	0.7291	0.9191	0.1705	-0.8543	-0.9311	1.0547	0.8001	0.6181	0.9632	0.1288	0.2279	1.4941	2.0684	-0.7797	1.4173	1.5376	1.5025	1.1324	3.063	-2.504	0.5278	-3.2748	-2.0123	2.1536	2.5773	-2.9799	0.0276	0.6894	1.0028	0.6851	1.1393
orf19.1491	SNU71	2.1267	0.3747	0.8882	1.2282	0.2058	0.9856	0.0217	0.4435	-0.5826	0.0008	0.0098	0.5626	1.6863	2.4229	-0.3353	-0.2708	2.8573	-0.9273	0.5174	0.899	1.1609	1.6081	-0.4135	0.3198	0.3092	0.1094	0.191	2.3059	2.6179	0.8868	1.1163	2.5613	1.2361	-1.7144	0.0324	1.8204	1.3001	ND	0.9486	1.158	0.6066	0.9821	0.1399	-0.8327	0.4966	-1.2244	0.15	0.8342
orf19.6171	NUP159	0.622	1.405	1.1741	2.1295	0.0282	1.6929	0.6276	0.6143	0.9003	0.1848	0.1811	1.8447	1.3687	-1.4504	0.3694	0.3425	0.3312	-1.215	-0.575	1.7863	0.2573	0.535	0.1191	0.5283	1.9591	2.2517	1.6177	1.2523	0.4377	0.3862	-2.661	0.429	0.0755	0.9813	1.581	0.9243	1.0727	1.5551	0.9912	0.7457	-0.0645	1.6836	-0.5227	-0.4747	0.2284	0.2104	1.1446	0.3784
orf19.2116	NAT2	-0.6106	0.8757	0.5665	0.0682	-2.4232	0.4948	0.7178	1.6366	0.8641	0.0875	0.4694	1.9221	1.8408	2.8323	1.6708	3.7787	1.1472	2.3622	1.1833	1.5416	5.2492	4.799	5.3981	2.7207	0.6388	0.2526	0.1538	0.0169	0.3124	0.4817	0.4892	1.4553	0.8653	-0.8336	1.3086	2.9444	-1.083	0.8965	-1.5892	0.0307	-0.4917	0.1264	-0.4526	1.2872	2.3462	1.5806	0.8879	-0.1157
orf19.1492	PRP39	ND	ND	ND	ND	ND	ND	ND	ND	ND	0.0008	0.0008	ND	ND	ND	0.2858	1.0722	0.1027	-0.959	0.0344	0.1981	ND	ND	-0.5647	0.4593	ND	ND	ND	ND	ND	ND	ND	ND	ND	ND	ND	ND	ND	ND	ND	ND	ND	ND	ND	ND	ND	ND	0.4027	0.0087
orf19.3080		ND	ND	ND	ND	ND	ND	ND	ND	ND	0.0008	0.3147	ND	ND	ND	0.0091	1.673	-1.2088	0.5153	-1.4189	0.8401	ND	ND	-0.8324	-0.4189	ND	ND	ND	ND	ND	ND	ND	ND	ND	ND	ND	ND	ND	ND	ND	ND	ND	ND	ND	ND	ND	ND	0.5009	1.18
orf19.4435		ND	ND	ND	ND	ND	ND	ND	ND	ND	-1.8875	-1.2978	ND	ND	ND	1.1344	-0.0743	-1.8997	-1.6208	-2.3007	-3.2672	ND	ND	-1.3438	-0.9109	ND	ND	ND	ND	ND	ND	ND	ND	ND	ND	ND	ND	ND	ND	ND	ND	ND	ND	ND	ND	ND	ND	-0.7158	-1.5513
orf19.290	KRE5	0.8866	-1.17	0.828	1.3574	0.5429	0.0698	0.6861	0.6382	1.0554	0.08	0.0008	0.8878	1.0275	0.6634	1.4085	0.1505	1.5569	-0.9417	0.9407	0.7359	1.331	1.2243	-0.8052	0.2795	1.4139	0.6118	0.5148	0.7452	0.2844	0.5293	1.0069	1.6617	0.7022	2.1386	-0.952	0.3096	-1.9369	0.0453	-0.2927	1.1277	0.4515	0.4578	-0.7031	0.0241	-0.5247	0.7957	-1.4818	-1.0329
orf19.7363	KRE6	1.1601	-1.2724	-0.5657	0.1529	0.4851	-1.2192	-2.0105	0.2106	0.7797	0.3725	-0.6784	-0.961	-0.9075	-1.4255	-0.6448	-0.6798	0.7826	-0.4039	-0.313	-0.9081	-1.1901	0.0197	0.8032	-0.5859	-0.8055	0.0356	-0.3098	0.7959	0.0639	0.3842	-1.4817	0.9996	0.0419	1.625	0.7523	0.9039	1.3292	0.871	0.4799	0.4983	0.5335	0.5199	0.9006	0.8681	-0.8416	0.0727	0.1647	0.6687
orf19.5861	KRE9	0.205	-0.9355	-1.1126	-1.0859	0.2221	-1.5389	-1.2278	-0.4029	0.0448	-0.9158	-1.4283	0.8167	0.5381	-2.0124	-1.5948	-2.413	0.4581	0.463	-0.9363	-0.7489	-0.1769	-0.5176	0.3427	-0.693	0.346	-0.6278	-0.3587	-2.1131	-1.4834	-1.4753	1.7659	0.8201	-1.1063	0.1666	0.9559	-0.6085	-2.1314	-0.9347	-0.8402	0.2956	-1.2233	-0.8179	1.3817	0.8131	1.4797	0.03	-2.0795	0.4489
orf19.1607	ALR1	0.0021	-0.6692	-2.2484	-3.3823	0.7628	-1.6033	-1.5403	0.3484	-0.6155	-0.5164	-0.686	-0.8826	-0.5582	1.2537	0.7686	1.0999	1.2316	0.1667	1.6171	0.4136	0.995	0.9036	0.2014	0.5409	-1.0454	-1.6799	-2.0583	1.841	1.9188	1.1955	-0.682	1.1725	1.1375	0.672	-0.5861	-1.2714	-1.2472	-1.2999	-0.5939	-0.4455	-1.5609	ND	1.7808	0.1326	1.6783	0.3603	0.0931	-1.0971
orf19.4009	CNB1	1.4667	1.0701	1.2726	1.5123	0.4345	2.5282	1.877	0.6881	0.7318	0.7716	1.7193	1.5554	1.8353	0.7153	-0.4475	0.7079	-1.3101	0.4514	-0.7307	1.0491	-0.6147	-0.6418	-0.447	0.1666	0.5266	0.6717	0.3503	1.373	1.7377	1.1593	-0.8149	0.4063	1.049	0.3361	0.8315	-0.2591	0.1198	1.1682	1.8034	0.5406	1.7588	1.5627	-0.2607	-0.9187	3.0403	0.7125	0.7206	0.6391
orf19.7298	CHS1	-1.9977	-1.3999	-1.26	-0.992	0.8293	1.5121	-1.0987	0.4478	-2.608	0.5196	1.0979	0.5475	0.692	1.1795	0.1108	0.883	-0.4529	0.9575	0.5473	0.9799	1.9762	1.439	1.8095	1.9494	-1.0965	-1.5842	-1.0061	0.9604	-0.5521	-0.197	0.3572	-1.0147	-1.2473	-1.6586	1.1872	-0.7084	-0.2602	-1.3234	-2.0288	0.6405	0.385	0.278	-0.6166	1.9974	0.5839	2.1077	0.7982	0.5858
orf19.5958		0.1931	-0.7726	-0.3677	-0.1355	0.6424	-0.5968	-0.4422	-0.5369	0.1456	-1.2475	-1.0832	0.3977	0.4908	2.8479	3.628	4.2627	-0.3472	-0.3718	-0.027	-0.2402	0.747	0.8105	-0.6501	-0.3854	0.1143	-0.3922	0.7002	0.8633	-0.2132	-0.2117	1.4027	0.6524	0.2108	1.5334	-1.1041	0.4095	-1.3028	-1.0156	-1.9821	-0.5338	-0.3012	-0.381	0.2508	-0.3364	0.4032	-0.9736	-0.2026	0.017
orf19.4937	CHS3	0.2104	0.149	-0.8162	-0.2789	0.0056	0.726	0.889	1.0418	0.1652	-0.406	-0.5477	-0.7788	0.1119	-0.5602	0.6043	2.4634	1.2011	0.9619	0.3524	0.156	0.3405	0.6709	0.7974	1.783	1.26	1.344	0.7184	-0.4059	-1.7292	-1.6874	-1.5115	-0.8506	-1.4271	1.1068	0.6753	0.2986	-1.2343	-2.2561	-1.3512	-2.4294	0.049	0.0515	-0.2102	1.2856	0.6147	-0.1531	0.7365	-1.6164
orf19.6399	ATS1	-0.4242	-1.4271	-1.2658	-0.4638	-0.553	-1.3213	-0.9811	-1.0043	-1.1196	-0.9409	-1.0546	-1.5764	0.2282	0.52	0.3184	-0.7287	-0.8165	-0.443	-1.1293	-1.4286	-0.9377	0.6463	-0.7215	-1.3495	-1.8837	0.015	1.2529	-0.6901	0.1902	-1.211	1.4025	0.7557	-1.7726	0.5769	0.3696	-1.5376	0.2648	-1.0632	-1.2037	0.0916	-1.6199	-0.1521	0.0281	-1.2925	-0.2988	-1.0142	-1.4428	0.2222
orf19.5101	CCR4	0.3461	-0.4172	0.1648	0.421	0.3979	-1.0502	0.9901	0.7781	0.0005	0.0008	0.0008	-1.5701	0.3077	-1.4237	0.385	0.2737	0.6873	0.4753	0.762	0.8853	0.9317	0.8525	1.596	-1.5092	-0.4057	-0.7598	-0.4244	0.3662	-0.2685	0.9814	0.7129	ND	-3.3159	ND	2.2881	0.5497	1.4601	2.6005	1.4799	1.0095	-0.9529	-0.3702	0.8029	-1.1427	2.4845	1.4734	0.4983	-1.2068
orf19.4174	FUN26	0.7651	1.0554	0.7111	1.0346	-0.5522	1.0268	1.8199	0.8433	0.699	1.2337	1.1293	0.8001	1.2291	-0.8724	0.3672	0.606	1.2847	1.4468	0.6661	1.2309	-0.8818	-1.2891	-0.2454	1.5266	0.0558	0.7376	0.5916	0.2685	1.5314	-0.1948	0.3692	0.3472	0.4276	-0.601	-0.3867	-2.4209	0.6796	1.0199	1.4909	0.2084	0.7012	1.1102	-0.9584	-0.549	-0.5752	0.0964	1.4189	1.1249
orf19.6812	PMT2	-0.4135	0.7789	-0.4354	-1.2191	0.507	-0.5988	0.5932	0.2621	0.6256	-0.6234	-0.7127	-0.7579	0.8634	1.0914	0.6621	-0.7855	-0.6653	0.7364	0.7251	-0.2205	0.3392	1.3524	0.3679	0.2937	0.3527	-0.7956	-1.5458	-0.2498	0.3822	1.3681	0.4891	1.8107	0.8329	-1.2945	-1.1712	0.0174	-1.8912	-1.1226	-1.5376	-0.4691	0.1073	-1.9567	0.5175	0.6834	0.4642	0.4726	0.5872	-0.4871
orf19.6778	DRS2	-0.8615	1.155	2.692	2.6376	2.7939	3.3684	3.8839	2.6603	1.2151	2.2773	2.1305	1.0489	1.2937	0.7433	-0.1337	0.985	0.8175	-0.8588	-1.2357	-0.8047	0.8927	0.179	1.0159	2.3057	1.4801	0.8403	0.2586	2.3917	0.9876	0.4096	0.6398	1.2263	3.4507	1.3068	1.2564	-1.7281	-1.0824	0.1852	0.0074	-0.7612	ND	3.2033	-0.9126	1.9549	-1.166	2.1521	1.256	ND
orf19.5083	RBG1	0.4571	-1.4032	-1.1252	-1.0292	0.5431	-1.782	-1.4157	-1.613	-2.274	0.0008	0.0008	-2.2666	-2.1861	-1.3955	-0.7364	-0.8615	0.716	0.4093	0.0989	-0.4252	-0.9362	0.0667	0.5655	0.0095	0.6411	0.1635	0.6395	-2.1299	0.023	-1.1744	0.4198	-1.3404	-1.6771	1.0484	2.1732	-1.6851	0.3228	1.3401	0.2751	-0.2602	-1.4034	-0.7189	-1.9747	0.4142	1.3855	-0.8488	-0.9312	0.0141
orf19.1957	CYC3	1.1892	0.4579	0.4178	ND	-1.6119	1.2912	1.4204	0.648	0.7253	0.0008	0.0008	1.7353	0.4761	-0.8351	0.1339	0.1587	0.5983	0.8717	0.2615	0.6911	0.0021	0.0637	0.2038	0.8648	1.5465	-1.0045	0.1967	0.4184	-1.9299	0.0951	0.6668	0.2187	-0.1927	0.4984	-1.0842	-0.4909	ND	ND	2.2256	0.1999	0.0687	0.3404	-0.7906	-0.3083	1.281	0.549	0.7226	1.4421
orf19.1960	CLN3	0.3818	-0.2498	-1.5267	-2.1896	-0.9293	0.1279	-2.2793	-0.869	-1.1391	0.5339	0.1588	1.2907	0.7197	-0.8826	0.0761	1.8789	3.235	3.1986	2.9282	2.987	0.7976	1.3823	1.4936	2.497	-1.3216	-1.286	-2.9387	0.7919	0.2962	0.6525	0.7075	0.2864	1.7978	ND	ND	0.8834	-0.8184	ND	0.571	0.0304	-1.0636	-1.5637	2.0449	1.1844	-1.5862	-0.6394	-0.4953	-0.7578
orf19.5006	GCV3	1.3641	1.0138	0.8459	0.9316	0.0172	1.951	2.0896	0.9844	0	1.5058	2.3994	1.7714	0.4968	-0.394	0.7003	0.6923	0.7055	-0.6299	0.1843	-0.5367	-0.8159	-0.6077	0.0737	0.2987	1.3422	1.2069	0.4815	1.0519	0.5533	0.6675	-0.33	-0.4623	1.1322	-0.8088	1.264	0.2496	0.8488	1.7719	2.2882	0.6713	1.2421	1.1595	-0.3454	-0.0402	0.8554	-0.1558	0.4208	0.9601
orf19.6016	GEM1	1.1553	0.7303	0.8418	0.8797	-0.8611	1.4922	1.3548	1.0843	0.4254	2.4447	1.6336	1.3011	1.877	0.0002	1.3575	1.7413	-0.8101	0.61	0.2775	0.9924	-1.0067	-0.4516	0.9301	0.5075	1.1406	0.9108	0.7409	2.3878	0.3325	0.8475	-1.8484	0.3468	0.8326	0.8208	0.1641	1.898	-1.349	0.7855	0.2564	-1.7884	0.8017	0.6982	-0.9498	-0.2532	2.082	1.764	0.8228	-0.498
orf19.4612		0.2285	0.1643	0.0168	1.0444	-0.072	1.3725	0.8833	0.1012	0.5298	1.6919	2.3536	0.0208	-0.0868	-1.057	-0.4814	0.8255	0.552	0.0807	1.0873	0.4264	-1.4977	-1.4646	1.231	0.8989	0.1587	1.0249	0.1735	0.4312	0.6619	0.394	0.424	-1.8995	-2.0741	-1.1746	0.7106	0.3048	0.9127	1.2118	0.85	1.427	0.6252	0.4658	-1.0552	-1.1357	1.0222	-0.9124	0.4926	0.1648
orf19.5300		1.0913	-1.2365	-1.6159	-1.1235	0.0167	-0.9918	-1.1414	0.033	0.1466	2.5195	1.4955	-1.1841	0.2858	-1.0203	1.1349	-0.3206	0.4679	0.5139	1.2082	-1.08	-0.8863	-1.0684	0.3694	-0.6095	-2.0428	-1.1758	0.02	0.5713	-0.9562	-0.8207	0.1588	-1.1671	-1.9345	0.7564	-2.2773	0.6177	0.8958	-2.2204	-1.3889	1.0122	-0.9914	0.261	-0.6557	0.9202	-2.4551	-1.0875	-1.1754	0.9455
orf19.5299	ECM1	-1.5216	-1.198	-0.2687	-0.3749	0.6736	-0.5346	-0.0715	-0.955	0.4477	0.7064	0.826	0.5335	0.1509	-0.2637	0.9658	-1.0722	-1.2832	-0.5735	0.2494	-2.3161	0.2899	-0.697	0.6401	0.0639	0.0977	0.2531	0.923	-0.8823	-0.7369	-0.1701	0.7091	0.3599	0.1211	1.1233	0.6878	-1.4254	0.1332	-0.7232	-0.2018	-1.1043	-0.4475	-0.0725	0.0593	0.2165	1.9338	-0.7149	0.1159	-0.1407
orf19.769	YAL061W	-2.3247	-1.1007	0.3044	-0.1547	-0.7949	-1.1065	0.5309	-0.8637	-0.581	-1.0142	-1.1127	-0.1146	0.3263	-1.5135	0.3902	-1.0481	-0.6273	-1.5567	-0.8243	-1.591	0.4251	1.0499	1.4597	-1.1088	0.6828	0.9116	0.868	-2.17	-1.5378	-1.733	-0.8755	0.114	-1.7444	-0.719	0.1866	-1.4907	1.2342	0.0891	-1.8951	0.323	-1.6318	-0.5067	0.5484	1.0082	0.268	-0.3599	-0.726	-0.5451
orf19.700	SEO1	-0.5015	-0.8627	-1.0619	-0.7295	0.5826	-2.0184	0.4289	-2.0558	0.2457	-0.9804	0.406	0.2592	0.1697	0.6163	-0.9951	0.0071	-1.0896	0.029	0.0761	0.1567	0.2363	0.4692	-1.2079	-1.0427	-1.8311	0.3091	0.6918	0.4533	-1.8793	0.0221	0.1615	0.7693	0.47	1.5733	-2.5453	-0.3594	1.7287	0.5808	1.2528	-1.3276	-0.8739	-0.3809	-0.0784	-3.1249	0.3648	-0.5251	-1.0697	-1.0854
orf19.3555		1.6896	0.0595	0.0678	-0.552	0.0943	0.5615	1.2478	-0.6485	0.4298	0.0007	0.0007	-0.4893	0.365	0.7239	-0.7167	-0.8888	-0.8129	3.4492	-0.6658	1.0313	0.6603	0.1937	0.2136	-1.4629	-0.718	-2.1012	4.0841	0.274	1.7567	2.1615	ND	-0.3245	0.659	1.1097	0.4629	0.4228	0.2896	1.0115	-2.2029	-1.7586	-0.6943	-0.5542	0.0753	0.1885	ND	0.7102	-0.3617	0.3389
orf19.7484	ADE1	0.2617	0.6114	0.2204	0.2472	-1.5113	1.4103	1.6928	0.397	1.3104	0.4975	1.3954	-1.6753	0.8551	0.19	0.296	0.7262	-0.9999	-0.3339	0.1014	-0.5666	-0.4852	-0.2733	-1.3448	0.9288	0.5	1.7461	0.0742	0.699	1.061	1.1432	0.2648	0.7794	0.9359	-1.9931	-2.0046	-2.4308	0.6371	0.338	0.7001	0.605	1.0053	0.4223	-0.8654	-1.0686	-0.6821	-0.5716	1.112	0.7126
orf19.4551	YAT1	0.6571	-0.0532	0.2542	0.6171	-1.9437	0.6437	2.0289	0.418	0.6508	1.4564	1.0625	0.8543	0.3156	-1.8994	1.2385	0.5215	0.1088	-0.6086	0.7403	0.3943	-1.2565	-0.5956	1.5131	0.3777	0.2517	0.358	0.0268	-1.8124	-0.8973	1.1704	-2.9279	0.6683	0.7904	0.1851	1.3576	1.1925	-1.4818	0.3152	-0.9891	1.913	1.4235	1.7255	-1.9002	-1.3054	-2.3282	2.1164	0.5659	-0.4028
orf19.7436.1	ECM15	0.7366	2.0058	1.613	0.9507	-0.6753	0.2175	0.377	1.4349	1.2206	-0.9107	-1.2536	0.3442	0.8949	-0.2133	-0.6651	-0.863	2.869	2.1567	1.9268	2.161	-0.9997	-0.6117	-0.6468	-0.2874	-1.0723	-1.5061	-1.8949	0.4713	1.2032	1.9065	0.0274	2.5764	2.1146	1.1048	1.2049	2.6501	0.5523	0.9286	1.4755	1.0164	2.1904	1.5675	0.9463	-1.1219	-0.1827	-1.174	1.9585	1.8612
orf19.4418	FMT1	-0.3635	1.4039	2.386	0.8861	-2.0255	1.6176	0.4721	1.8421	1.3762	1.025	0.8657	0.3834	1.929	0.7235	0.9468	-0.4935	0.986	-1.7172	-0.9267	0.4421	-0.4798	0.8387	-1.2057	-0.7477	1.1542	2.3705	1.2388	0.2692	0.2699	2.3765	0.8709	0.5918	2.433	-1.3684	1.4372	0.7144	1.1218	0.7593	0.8576	0.1596	0.3958	1.2153	0.4356	-1.7879	-0.8163	0.6678	1.2983	-0.6215
orf19.2886	FUS3	1.101	1.075	1.1875	0.6857	-0.6477	1.2038	0.8864	0.7415	0.9824	0.3073	0.1146	-0.169	1.3652	-1.0408	0.2369	0.3989	1.5293	2.1668	2.3264	3.3076	2.1468	1.9202	5.0592	3.2954	0.2773	0.4275	0.0692	0.7034	0.403	0.2724	0.52	0.289	-0.5738	-0.2222	0.2323	1.1066	-0.9513	0.2355	0.0961	-1.0589	-0.4223	-0.5986	-1.048	1.1486	1.3896	1.2442	0.1629	0.9138
orf19.1836	APN2	-1.4815	-1.0963	-1.3613	-1.0777	1.4968	-0.9981	0.9599	-0.795	1.4216	0.2124	0.5219	0.125	0.0817	-0.626	0.1143	0.0564	-1.0626	0.4837	-0.5908	-0.9937	-1.0487	0.3861	-0.6589	0.3025	0.4026	0.5455	0.2713	1.7886	0.0108	0.4198	1.2859	1.0757	0.4298	0.3903	0.4501	0.0913	-2.8188	-1.4609	0.6076	-1.5716	-1.2855	-0.4497	0.1029	0.8229	1.0515	0.2371	0.2377	-0.7777
orf19.517	HAP3	2.1377	-0.9752	0.1964	0.0252	1.2748	-0.564	0.3273	-0.9283	0.1529	-1.5288	-1.4747	0.9928	0.5595	1.2671	2.2297	-0.1663	1.4064	0.0663	0.345	-0.4492	-0.6864	-0.9291	-1.0848	-0.7406	-1.0746	-0.7153	-0.7399	0.2744	-1.8828	-2.0299	1.2279	0.9892	0.5398	0.6682	0.7329	0.0048	1.5071	1.2971	1.2664	0.0514	1.1983	1.6706	-1.3258	-1.8798	0.8933	-0.2004	-0.9635	-1.7026
orf19.522	PIM1	-1.3554	-1.969	-1.667	-1.1585	0.3047	-0.0314	-0.7075	-1.1042	0.8834	0.2643	0.3129	1.3558	-0.6612	-1.8203	0.2034	-0.2289	-0.8167	-0.9406	-1.0347	-1.3343	-1.0424	-1.5177	0.3817	-0.401	-0.453	-0.8898	0.1919	-2.6999	-0.9855	-0.3703	1.8645	0.6136	-1.0795	ND	0.479	-1.853	ND	-1.5586	0.5427	-1.4986	-0.8256	-0.3975	-2.0942	1.101	0.7318	-0.6119	-0.3278	1.1847
orf19.4996		0.9414	1.2224	1.1067	1.6192	-0.3284	0.7481	0.6839	1.7426	0.6367	0.1533	0.7513	1.4398	1.3457	-1.111	0.5686	-0.1385	0.3469	-0.552	-1.0441	0.2644	-1.5016	-0.8488	-1.1723	-0.9464	1.3158	0.9905	1.0216	1.0825	1.0097	1.4671	0.5431	1.294	1.2732	0.2435	-0.9539	0.3016	0.003	-1.371	-0.6421	1.3966	0.7822	0.6466	-1.1349	-0.7481	0.7153	0.7296	0.5864	0.0932
orf19.2862	RIB1	-0.7294	-0.8181	0.3026	0.0281	0.2447	0.1587	-1.179	0.5673	-0.7538	-0.6838	-0.6698	0.5084	0.5081	0.4966	1.6795	0.6605	-1.2329	0.5524	-1.0521	-1.4628	1.0264	0.7225	-0.1013	0.2721	1.0343	0.5351	1.2364	-0.5699	-0.6181	-0.563	1.4413	0.8035	-0.5803	0.6168	0.6168	-0.3194	-0.3582	0.0728	0.7482	-0.906	-0.442	-0.2267	-1.3328	0.987	0.5328	-1.4708	-0.4301	-0.887
orf19.2794	YBL036C	1.4684	-0.636	-0.3003	0.4688	1.0961	-2.0889	-1.0559	-1.3412	-0.5218	-1.0178	-1.3159	-3.4381	-1.0959	0.8513	0.003	-0.8533	0.0103	1.114	-0.6847	-1.2168	0.3121	0.1456	0.3102	-1.4699	-0.5895	-0.3934	0.5455	0.7216	-0.8014	0.6973	0.0555	1.0456	0.564	-1.5821	1.2572	-1.1208	1.0896	1.904	1.0569	-1.4849	-1.2055	0.1559	2.013	-2.1762	0.468	0.3042	-1.3069	-0.711
orf19.4016	COR1	-0.75	-0.2361	-2.0392	-2.4067	0.0994	-0.7254	0.0685	-0.4403	0.7704	0.4428	0.3301	0.3538	0.2058	0.8223	0.8533	0.7752	2.0486	1.5723	0.5867	1.3169	0.9068	1.3547	0.0485	0.8228	-0.9841	-1.2748	-1.7949	0.6459	0.2829	0.1156	0.8219	0.8822	1.0152	0.1081	0.2306	1.4592	0.2814	-1.2291	-1.0201	-0.766	-0.7014	-0.9814	0.2499	0.4894	0.1688	0.9815	1.3344	-0.6818
orf19.2534	PIN4	0.5668	-0.2578	0.089	0.5048	-1.3531	-0.8172	-1.0182	0.2789	-0.0943	-1.0862	-1.952	1.4314	0.3596	0.8526	0.332	0.2151	-1.2331	-0.7245	-0.6428	0.1464	0.3786	0.9471	-1.005	-0.776	3.1108	2.6392	1.9908	1.4478	1.6201	0.4657	0.6883	0.5248	0.3591	-0.1531	ND	-1.9424	-2.2674	0.1852	0.8848	0.5449	0.4604	-0.4112	2.241	-0.3924	0.2876	-0.6316	2.1087	0.1733
orf19.2544	PTH2	0.9897	0.9379	1.0449	1.1278	0.4515	1.5844	1.7673	1.4241	0.7893	1.5065	0.6837	1.5279	0.3213	0.4845	-0.7186	0.9294	-1.1273	0.4872	1.0407	0.1527	-0.8139	-0.8097	-0.7785	0.0978	1.2479	1.345	0.387	0.3158	0.8865	0.3342	0.3774	0.2223	0.3366	0.1185	0.2601	0.2023	0.8311	1.0802	1.5984	1.4537	1.5476	1.2416	-0.5651	0.1652	-0.6775	-0.507	0.4334	1.3163
orf19.2549	SHP1	0.8676	1.3816	1.1875	0.7801	-0.7157	0.5161	0.2571	0.9535	0.7258	0.1717	0.0008	1.3416	0.4134	1.1348	0.443	0.3531	-0.5727	-1.0244	-0.621	-0.9286	0.2504	0.8714	-1.6096	0.2939	0.4129	0.8751	1.1329	1.1573	0.7054	0.8052	-1.2333	1.4261	0.6319	1.9628	-0.8151	1.6215	1.4558	0.9493	-0.5728	1.1455	0.772	0.1864	-0.364	0.2076	0.3121	0.2264	0.1791	-1.0034
orf19.6810	TPD3	0.2461	1.2326	1.4776	0.7912	-1.0943	0.6556	0.7562	0.2571	0.2999	0.3159	-1.0793	0.0417	-0.5953	1.1069	-0.7032	-0.1217	0.0276	-0.757	-1.6227	-0.5115	2.5017	2.4522	-0.4003	-0.81	3.3234	3.0699	3.2411	-0.3332	-1.2477	-2.1323	-1.8939	-1.1842	0.2512	ND	ND	0.1997	ND	-1.5457	-1.7927	0.3033	-1.2249	-0.2182	0.5434	1.5884	1.408	0.8151	0.5754	-1.2798
orf19.712	KIP1	1.3805	-0.9596	-0.6189	-0.2869	-1.4174	-1.3313	-0.9822	0.323	0.1903	0.0008	0.0008	-0.8652	-0.8167	0.1453	-1.2179	-0.626	-1.1617	-0.9179	-0.6955	-0.8317	-0.9035	-1.0256	-0.3339	-0.9664	-2.1052	-1.4792	0.1977	-0.7808	0.2004	-0.4293	0.2334	-0.8825	-2.149	0.9109	-1.1098	-1.3141	0.8746	0.9413	-0.1655	-0.4453	-0.9916	-0.8277	0.6476	-1.548	0.5597	0.603	0.0636	-1.6342
orf19.5180	PRX1	0.2825	0.3473	-0.9528	-1.7928	0.0337	0.9487	-1.0659	1.3589	-0.4221	1.1669	-0.3938	-0.5112	0.7001	-0.8495	3.5216	0.9281	0.0973	-0.778	0.359	0.0084	1.5388	1.0275	1.1628	1.4776	-0.3367	0.3737	-1.5574	0.0034	0.4216	-0.3283	-0.9031	0.3518	1.0404	-0.6663	1.1583	-0.5444	-0.7059	0.3587	0.1914	0.4793	0.2378	-2.4849	1.9711	1.3268	0.2189	2.0998	-0.5854	-1.2488
orf19.2480.1	ATG8	0.5969	-1.1162	-0.4409	-0.483	0.1401	-1.343	-1.5563	-1.9401	-0.7743	0.0007	0.0007	0.7117	-0.9754	0.1098	-0.4703	-0.76	1.5859	0.1227	0.5626	-0.8449	-0.3828	0.1555	0.0674	-0.8149	0.1088	-0.5527	0.6298	-2.1302	-1.6719	-0.4887	-0.9368	0.5981	0.0318	0.2695	0.4003	-1.0832	1.2304	1.5429	0.0137	-0.9147	-0.987	0.1127	0.4334	-0.1998	-2.4918	-0.7056	-1.7261	-0.5571
orf19.2485	NUP170	0.5848	1.5766	0.7329	0.6576	1.2014	-0.2306	0.0335	-0.6758	-0.7074	-0.9605	-0.0778	-0.6886	-0.0184	0.2244	-0.5989	-2.2592	-1.1892	-1.5574	-2.15	-1.3108	0.1654	0.1854	-0.7128	-1.8456	2.9205	2.418	3.1775	-0.7284	-0.8421	-0.7492	0.547	0.6272	-1.0379	0.1592	-1.0689	-1.8066	-0.5227	0.2557	-1.9415	0.9576	0.7613	0.967	-0.5507	0.8987	0.8443	-0.6782	-1.1835	-0.7645
orf19.2494	PET112	1.4541	-1.2667	-0.3561	0.1739	0.4987	-1.7817	-0.9345	-1.8686	-0.7966	-1.4976	0.7164	-0.6554	-2.2434	-0.0816	-0.9282	-0.5238	-1.3437	0.1338	-0.4621	-1.0782	-1.2285	-0.9883	-0.9524	-1.2235	0.0399	-1.6548	-0.4172	0.3303	-1.4363	-0.9546	0.5251	0.8159	-0.988	-2.7998	-1.9897	-1.0098	1.8451	1.0641	0.8196	-1.9501	-1.2188	0.0318	-0.8888	-2.8005	0.8423	0.7221	-0.9956	-1.2579
orf19.2852		0.0158	-0.136	-2.3743	-3.1961	1.8239	-1.4717	-1.8121	-1.652	0.1298	0.0007	0.0007	-1.3696	-0.5926	0.2028	1.4116	1.5222	-0.8928	-0.7267	-1.7143	-1.1269	0.1029	-0.7997	1.2491	0.7048	0.0312	-1.3051	0.4921	-1.5589	-1.8063	-2.4099	1.6943	-1.7947	-1.4075	0.2968	0.5492	0.0675	-1.0204	-0.4114	-1.6232	0.346	-1.4042	-1.9439	-1.2156	1.7788	1.5911	1.2015	-1.133	-0.783
orf19.1214	MAP2	-0.1038	0.6475	0.1379	0.4873	0.1201	0.9509	0.7347	0.4639	0.8735	-0.613	-0.9756	-0.4333	-0.9804	0.116	0.9255	0.1273	1.238	1.6045	1.2773	0.6008	-0.7535	-1.3152	0.091	0.8556	-0.9169	-0.9164	-2.0391	-0.7181	-1.2088	-2.1228	-0.7169	0.0846	0.4259	0.2673	0.6416	0.3287	0.2485	0.4958	0.6564	0.1269	-0.5614	-1.5915	-1.1231	1.0148	-0.7415	-0.9619	0.2807	-2.7482
orf19.3548	YBL095W	0.3559	-0.9791	-0.81	-0.9592	0.1116	-1.1431	-0.9283	0.0127	-0.2647	-0.9811	-1.6392	-0.8835	-0.6136	-1.4932	-0.5882	-0.6051	-2.0575	-0.8691	-1.1631	-0.9081	-1.442	-1.3972	0.0654	-0.7447	-0.7584	0.6311	-0.4718	-1.0085	-1.1592	0.5251	-0.5189	-0.7477	-1.4524	0.6473	0.9343	-0.925	-0.8699	0.5082	0.6249	-1.463	-1.5285	-0.3695	0.7914	0.5171	1.1866	0.3888	-1.0187	0.8042
orf19.5443	BNA4	0.7883	0.7098	0.5208	0.6517	0.2386	1.2296	1.8065	-0.7055	0.7639	1.2816	0.0008	1.4474	0.7197	-0.1165	0.6195	0.7752	0.6057	0.4596	-1.9035	0.3816	-1.0659	-0.9999	-0.7121	1.1786	0.2895	-0.375	0.1577	0.3545	0.6183	1.4876	-1.1438	-0.6282	-0.4406	-0.4867	0.4276	-0.6552	0.0041	0.7	0.0279	-0.5881	0.6753	0.766	0.0766	0.0317	1.3549	0.8886	1.1657	0.9841
orf19.2342	SFT2	-0.1266	-1.9833	-1.3293	-1.2188	0.1852	-0.6501	-0.3708	-1.2323	-0.8907	0.819	0.6376	-0.8736	0.4764	-1.6241	-0.2874	0.039	0.9988	0.4185	0.2211	-0.6475	-1.8339	-1.9644	0.6848	-0.3199	-1.2074	-0.5867	-0.8049	0.8268	0.3202	0.0688	0.3368	-1.748	-1.4086	0.9375	0.4762	0.2405	0.6993	1.0436	-1.421	0.3979	-0.8353	0.2486	0.4364	1.0487	-0.3588	-0.9263	-0.443	0.6978
orf19.1198	YBL107C	0.0884	0.9714	1.2127	0.9184	-0.8928	0.7813	1.0266	1.3712	0.9464	0.0008	0.284	0.5721	0.629	-1.5742	-0.6425	0.1983	-2.0234	-1.0275	0.1773	0.2654	-1.4142	-1.1323	0.5871	-0.4847	1.4065	1.1987	0.2722	0.5177	1.2132	0.6334	-0.9545	0.222	0.5248	-2.4956	0.8041	0.618	0.4562	1.976	0.3541	0.54	0.2448	0.505	-0.7852	-0.5649	0.9886	0.7452	0.8728	-0.7455
orf19.7478	COQ1	0.1823	-0.2773	-1.2909	-1.8189	-0.6137	-0.2238	-0.2348	0.1897	-0.2339	0.0008	0.0008	-0.0709	-0.0594	0.9123	1.0772	0.3452	-0.87	-1.131	-0.5579	-0.8291	1.3678	1.3579	0.4742	0.6486	-0.4056	-0.7672	-1.5517	1.6024	2.47	2.5455	0.2175	1.0354	1.2905	-0.6567	0.3306	-1.088	-0.5255	-0.8011	-0.8236	0.5371	-0.5822	-2.0527	1.88	-0.2804	0.8388	0.4855	0.0206	-1.7002
orf19.1063	FMP44	0.3241	-1.244	-1.915	-1.7547	-2.4274	-2.5254	-2.7463	-0.7093	-0.2649	-1.3127	-0.7909	-0.9802	-0.4184	-0.3455	1.9067	2.0861	1.4021	0.7627	1.5015	0.6828	0.2129	-0.4752	0.1331	-0.2598	-2.3367	-2.5727	-2.3962	1.1144	0.4047	0.7759	0.5554	0.5535	-1.3201	-2.912	1.4184	1.3572	1.3469	0.2258	0.4444	-2.3673	-1.3019	0.1454	0.4756	0.8436	0.441	0.0422	-0.2489	1.6807
orf19.3586	RCR1	0.8927	0.4907	0.6164	0.9778	0.2392	-2.2809	-2.0873	-0.8858	-1.5727	1.1612	0.7631	0.2207	0.4754	0.3069	0.4298	0.4242	0.5674	1.5891	0.9201	0.4472	-1.5654	-1.7039	1.6954	2.4197	-1.9987	-0.8929	-0.9913	1.6731	-0.1696	0.6558	-2.1095	-0.3588	-1.2056	-1.0238	-1.8682	-1.9149	1.2081	-0.6028	0.349	2.2819	0.5164	0.9553	0.5573	-2.1091	-3.5629	0.4561	-2.7735	2.3461
orf19.345	UGA2	1.3772	-0.5773	0.4525	0.5753	-0.6738	-1.8086	-0.8637	-0.7896	0.6258	-0.6831	-1.0133	0.0079	-0.6513	0.6468	0.3361	-0.3056	-1.217	-1.356	-1.1458	-1.1723	-1.2651	-2.0893	0.2514	0.1957	-0.678	-1.0269	-0.8021	1.0366	-1.7477	-0.8892	1.7833	1.091	0.0836	0.1006	-1.0424	0.9488	0.5951	0.4365	0.0407	0.6947	0.8382	0.7372	-0.6355	-1.8942	-1.0732	-0.4191	-0.7993	-1.039
orf19.6268	DSF2	0.4059	-0.9556	0.2343	0.4566	1.2078	-0.7669	0.2294	1.3144	0.5842	2.0828	0.052	1.0095	1.0942	-0.7325	-1.455	0.2348	-1.7055	-2.2388	0.0843	-2.8926	-2.5425	-1.5466	-0.394	0.6355	-1.4247	-1.4194	1.4395	0.348	0.1759	0.144	-2.2021	0.1624	0.4326	-1.2497	-2.4426	-0.9609	1.4644	0.8142	-2.0154	-1.0167	-0.2512	0.4843	-2.3769	-1.7817	1.5889	-2.2941	0.7496	1.3741
orf19.5604	FLR1	-0.9519	0.039	-0.3578	-0.1109	-1.5325	0.2325	0.6601	-0.7262	0.1586	0.4177	0.0008	-0.5345	-0.58	-0.7349	-0.7469	1.9954	-1.0616	-0.8695	0.3117	-0.7703	-1.361	-1.5385	0.6633	-0.8232	0.2152	0.1699	0.1509	2.6102	0.0215	-0.4222	-1.1594	-1.3923	-0.7978	0.6212	0.7074	1.1014	0.4111	-0.3126	0.0789	0.2497	0.5965	0.7562	0.1312	0.8436	-0.5286	-0.9307	-0.8643	1.4235
orf19.1854	HHF2	-0.6452	-0.8747	-0.4334	0.4349	0.3654	-1.5484	-1.1271	-0.6983	0.6331	0.1399	-1.3725	0.3171	0.0705	0.2103	0.3674	-0.1155	-0.2913	-1.0195	-1.6041	0.1087	-1.0529	0.0803	-1.0865	-1.174	0.0273	0.2968	0.9994	0.3302	0.457	-0.9339	0.9978	0.4086	0.2433	-1.6509	-2.2994	-1.189	-0.5662	-1.4179	-0.6464	-0.8016	-0.7249	0.1118	0.2554	-1.0563	0.6371	-1.5909	-1.1567	0.1085
orf19.1853	HHT2	-0.6435	-1.5331	-0.9094	-0.7107	-0.3633	-0.9538	-1.2339	0.3829	-0.2832	-0.8463	-1.4731	-0.0628	-0.5291	0.1854	-0.6269	-0.2801	0.7852	-0.2864	-0.7005	-1.2157	0.0585	0.2401	-0.5423	-0.5184	0.6088	0.0263	0.2402	-0.881	-1.0118	-0.2967	1.5374	1.2707	-1.3022	-0.906	0.206	-0.8994	-0.7364	-1.4561	-1.0146	-0.8637	-0.7871	-0.3878	-0.7275	0.8047	1.3876	0.2826	-0.9989	0.174
orf19.4150	YBR014C	0.6789	1.0205	1.4279	0.7575	1.9798	1.271	1.382	1.9166	0.7266	0.6235	1.3371	1.4004	1.5018	0.7088	2.4556	1.3962	-0.7267	0.9771	0.4093	-0.6203	-1.0854	-1.4351	0.621	0.6408	-1.1587	0.2853	-0.577	1.5409	0.7765	0.5189	0.267	0.6792	0.1622	-1.5601	1.054	0.0892	2.8775	2.2596	0.3868	1.3171	1.5166	2.3192	-0.3011	-1.0248	1.0201	-0.7319	0.1888	1.3027
orf19.1011	MNN2	0.796	-1.5197	-1.0281	-1.089	2.5347	-1.725	-0.9703	-0.5032	-1.6628	-1.8206	0.9504	-1.1748	-1.5567	1.359	0.5998	0.9055	0.3217	0.8628	-0.4413	-0.6385	-1.8937	-1.7594	1.3061	0.8128	-1.6109	-1.3603	0.1149	0.6025	-0.6488	0.1302	1.0983	0.5386	-1.6458	0.0981	-0.7277	-1.9954	0.8814	1.7849	0.1942	-1.1059	-0.683	-0.4185	-2.4423	-2.7822	0.9998	1.3869	-0.7981	-0.5268
orf19.3215	YBR016W	0.9717	0.8208	1.4483	1.0627	-0.6915	-0.4163	0.6568	1.0553	-0.8222	-0.4754	1.1916	0.43	0.5961	0.1682	0.199	0.4934	-0.6691	-0.015	-0.4809	0.9005	-1.5296	-1.2334	-0.9225	-0.4188	0.6046	-0.4789	-0.2404	-2.0512	0.8588	0.5757	-1.0185	-1.2145	-1.0905	-2.3973	0.5018	-1.0597	0.1955	0.4408	0.5682	-0.1966	0.1673	0.6869	-1.5511	-0.483	0.1996	-0.0951	0.4607	0.6162
orf19.3675	GAL7	0.8346	0.3903	0.2079	3.4165	0.0919	-1.6921	-0.9661	-0.9125	-0.9022	0.493	0.0596	-1.1685	-0.6949	1.6009	0.0597	-0.3307	0.5257	0.3257	0.1035	-0.5201	-1.6764	0.0983	0.1012	0.2161	-1.9096	0.7222	1.0641	0.2832	-2.2542	0.8408	-0.635	1.9598	-1.1206	0.6602	-1.4688	0.982	-2.4683	-3.1481	-2.3947	-1.7273	0.8642	0.0389	-1.1928	1.0895	0.3862	0.4796	-0.5582	0.0967
orf19.3672	GAL10	0.5083	-0.2869	0.5453	0.3162	0.4817	-1.4015	-0.5804	0.6183	0.5577	0.9846	2.3878	1.0108	-1.1207	1.0321	0.3864	0.4082	0.602	-0.228	0.103	0.2292	-1.6921	-1.1769	-0.7257	0.1273	-0.2647	0.6613	0.9943	-1.0356	0.3037	-0.7263	0.8546	0.2788	0.667	1.4607	-1.9071	1.3977	-1.1532	0.913	-0.6451	1.1105	0.2452	0.0774	1.0973	0.2593	0.5636	-0.6188	0.2165	0.0862
orf19.313	FUR4	0.4544	-1.2064	0.3887	0.1319	0.8331	-1.501	-2.4099	-1.6707	0.2994	-2.2399	-1.9406	0.0538	0.3012	-0.603	2.4572	0.2333	0.5035	-0.4294	-1.6228	-1.7002	-1.0741	-0.5554	-0.8821	-1.1808	-1.4082	-1.835	0.1787	0.1492	-1.2271	-0.7634	1.7389	0.2047	-1.1599	1.736	-1.5346	0.2068	1.6405	-1.7291	1.631	-1.7233	-0.4924	0.3866	-0.5263	ND	-1.7259	-0.6026	-0.4895	-1.0469
orf19.1950	POA1	-0.1891	-0.4073	-3.0048	-3.4431	-1.2156	-1.9293	-1.5336	0.1415	-0.8349	1.0277	1.5315	0.5563	0.8688	0.9197	-0.8767	-0.6214	1.5478	1.9275	1.8973	1.8148	-1.1706	-0.3275	0.5287	-0.2885	-3.1512	-2.9599	-5.1185	1.3956	2.099	2.5926	0.0107	-0.9748	0.0764	0.1431	2.4406	0.6669	-1.5392	-2.1075	-1.6713	-1.0964	-0.6491	-1.0785	2.7374	1.6367	-0.6354	-0.3026	0.4854	0.1181
orf19.754	YBR025C	0.4516	0.5254	-1.6231	-1.1617	1.3083	0.163	-1.4658	-1.459	-0.3283	0.0008	0.0008	2.3707	0.1902	-0.3482	-0.6936	0.3288	0.2973	0.4295	-0.6609	0.9465	-0.454	-0.4843	0.1569	-0.2305	-1.0549	0.376	0.6865	-1.8263	-1.1371	0.4785	1.5601	0.4707	-0.3178	0.5922	-1.0175	-1.3853	0.0068	ND	0.5138	0.381	0.1637	0.5083	0.3158	1.3331	0.8135	2.1944	-0.4169	0.2449
orf19.5450	ETR1	-0.007	1.5092	1.36	1.5105	-1.5666	0.612	0.6584	0.4972	-0.276	0.6311	0.7866	0.2446	0.496	-1.8869	0.122	0.8525	0.6742	-0.5966	0.7085	0.6719	0.076	0.5221	-0.965	-1.4488	0.6974	1.2111	0.7155	0.7751	0.2206	0.7407	-1.1808	-0.7771	0.5994	-0.3543	-0.7715	-0.7236	0.2742	0.6568	0.5427	-0.5783	-0.2908	0.5524	0.1641	0.3896	-1.0694	1.5888	0.9014	0.3963
orf19.7223	YBR030W	0.9606	1.0748	1.1719	1.3519	-1.3224	0.6448	1.1608	-0.3293	1.2255	0.2485	-1.0931	0.8159	0.9168	-1.3248	0.0082	0.4329	-1.3708	-0.6705	-0.603	-0.384	-1.2521	-0.6156	-1.4077	0.6795	1.086	2.0176	1.5151	-0.3443	0.7067	1.5104	-0.6872	-0.7119	0.8315	0.4461	0.4125	-2.0244	-0.9291	0.8164	1.0892	0.0681	0.0667	0.8816	0.0485	ND	0.2514	0.651	1.0658	-0.511
orf19.3291	HMT1	0.086	0.7895	0.9844	1.645	-1.7783	1.2391	0.6165	0.7242	0.8615	0.1271	0.0118	1.577	0.0049	-2.3927	0.52	0.4999	-1.2574	-0.8835	-0.6625	0.3124	0.9115	0.2718	-1.6662	-1.3395	0.6133	1.2791	1.451	0.4247	1.6293	1.1816	-0.8058	1.1479	0.9672	-0.3956	-1.8341	0.1646	-2.1766	0.0653	0.1012	-0.6996	-0.1456	0.7231	-1.873	1.8989	-0.1751	1.2067	1.2213	0.3274
orf19.550	PDX3	-1.1769	-1.2426	-0.7363	-0.3093	0.2652	-1.4203	-0.9246	-1.2483	-0.4434	0.0625	-1.0878	0.0872	0.6563	-0.7752	1.1416	-0.8041	0.1101	0.4383	-1.9576	-1.2768	-1.4164	-0.9695	-1.3013	-0.917	0.028	-0.1564	0.2784	-1.4834	-2.0413	0.6516	0.6013	0.666	-1.1608	0.8281	0.6414	0.3571	-1.2882	-2.6148	-1.9498	-0.4691	-1.0286	-0.3034	-0.6964	-0.7803	0.2863	-0.9804	-0.817	-0.3666
orf19.137	YBR042C	ND	-0.145	0.5188	0.4758	-0.746	1.0479	0	0.9083	1.4435	1.4294	0.9661	1.3399	1.2988	0.5174	0.9914	0.4608	2.3732	0.8869	-0.7218	1.2312	0.7814	1.5891	1.1699	2.8302	0.6907	-1.5163	-1.9043	1.1917	1.2841	1.5011	0.1144	ND	-0.0982	2.856	-0.4998	0.5651	0.0935	ND	3.6638	0.4042	-0.1571	0.7663	1.1063	0.6063	ND	-0.6335	2.1143	1.0638
orf19.136	QDR3	-0.3466	0.2318	0.5049	-0.0998	0.4691	0.7645	2.4072	0.0602	0.5056	1.1485	0.4568	0.0769	0.0077	-0.4689	-1.0365	0.3997	-0.6353	-0.5167	1.2557	0.6893	-1.1295	-1.1625	0.7069	0.3569	-1.2211	0.1776	0.6073	0.4233	0.4025	0.0991	-1.4674	-1.4688	0.1241	ND	ND	0.393	1.2936	0.911	-0.9813	0.6732	0.5346	0.7252	0.1912	-0.0688	-1.8697	0.7133	0.337	1.3942
orf19.2262	ZTA1	0.067	-1.2806	-0.5472	0.5967	0.7854	-0.9625	-1.144	-1.5648	-2.3206	0.6992	1.1551	-0.4371	-1.3646	-1.2329	1.3291	-0.3763	-1.7579	-1.084	-1.1192	-3.0141	-0.4736	0.1737	1.4682	0.8719	-1.4571	-0.8233	0.1829	-0.5033	-1.4536	0.0098	1.5943	1.4677	-1.3273	-1.2444	0.5283	0.4105	3.7869	1.1203	-0.3056	0.2028	0.1392	0.376	0.5233	-2.0267	-1.1323	-1.4389	-1.374	1.1672
orf19.4149.1		2.4761	0.7867	1.2821	0.8287	0.755	0.0586	0.8474	0.6988	0.02	0.6369	0.8545	2.0909	-0.7254	1.3108	-0.6539	0.2126	2.322	2.395	1.1454	2.0321	-1.2906	-1.445	-0.0511	0.764	0.4411	-0.1282	-1.1858	0.3103	0.1675	-0.5578	1.4435	1.8622	0.8983	0.0121	-1.0744	0.2304	-2.4706	-1.9479	-1.7028	-0.4569	0.6536	-1.8843	-0.346	-0.7607	0.1102	-0.3742	-0.7979	0.2573
orf19.2722	YBR053C	0.4433	-0.7764	-0.2385	-0.2946	1.2945	-1.1187	-1.8516	-1.1314	1.0585	-0.8925	-0.8716	0.6811	-0.2941	-1.3397	0.7653	-0.8993	0.0321	-0.8996	1.1142	-1.9671	-0.3206	0.257	0.6557	-0.6653	0.7105	-0.9941	0.8061	-1.2004	-0.5162	-0.7311	0.9932	-0.6239	-0.7141	0.0109	0.3048	-0.7841	-1.1192	-0.8778	-0.2438	0.4675	0.3469	0.0637	-1.9071	0.5998	1.3974	-1.0639	-0.5639	-1.3291
orf19.1516	UBP14	-2.2439	-1.0674	-0.7232	-0.6792	0.5056	0.6113	-0.6993	-0.967	0.8046	0.2366	0.4087	-2.0989	0.7927	0.8687	0.7341	2.9815	2.0286	0.3407	-0.5075	-1.3227	2.0424	1.6734	0.1126	0.3883	0.4858	0.3766	-1.4122	-0.2304	0.6921	1.0029	0.1021	-0.7317	-1.3318	1.1105	0.5711	0.574	-3.5927	0.7239	1.6938	-0.5018	1.3219	1.2888	1.2867	1.8591	1.1664	2.0164	1.2416	2.8811
orf19.6751	TRM7	0.5028	-0.376	-1.4587	-1.9761	-1.3809	-0.3207	-0.2198	0.6906	-0.1488	-0.6538	0.1622	0.6375	0.8865	0.7433	-0.3079	0.2458	-0.9565	-0.5491	-1.2821	-0.3137	1.2387	0.9579	-0.5968	0.1406	0.124	-0.7397	-1.3726	2.4342	2.1428	1.3957	-0.6978	1.2352	0.7838	0.6737	0.0918	-0.6809	-2.0625	-1.6371	-1.7572	-0.8049	-0.9688	-2.4354	-0.4707	0.6262	-0.4592	0.9644	1.1361	-1.028
orf19.5364	ECM2	0.5546	1.1992	1.1855	0.9302	-0.5968	0.8926	0.8682	0.6053	0.6406	-0.6958	0.4902	-0.1939	0.7343	0.2576	0.4004	0.0175	-0.6721	-1.2799	-1.0413	-0.507	-0.2116	0.0118	-1.3419	-0.8062	0.2036	0.6128	0.6084	0.8383	0.4946	1.1137	-0.8959	-0.3028	0.8781	0.3308	1.5795	0.353	0.6296	2.0584	1.2549	-1.02	0.2015	0.8805	-0.9093	-0.5447	0.1598	0.6136	0.9131	-0.9685
orf19.5367	RDH54	0.5467	0.5112	0.522	0.6028	-0.8613	1.8388	1.4428	0.3935	1.1922	2.3577	2.0939	2.6239	1.3068	-1.0049	0.2335	0.8239	-1.2122	0.2644	-1.3522	-0.8392	-1.1482	-1.3506	0.5682	0.6533	0.4198	0.7337	0.4916	0.7921	0.1337	0.5705	-1.6951	-1.167	0.6037	0.6525	0.8741	-0.7938	-0.1117	0.2641	0.9058	-0.2225	0.0909	1.279	-0.6261	-0.3815	0.7271	1.916	0.3125	0.9984
orf19.5370		0.8982	0.4003	0.7161	0.6805	-0.9516	1.1089	2.3505	0.2026	0.0272	1.3949	1.8721	0.3691	1.0531	-1.6049	0.4377	0.3506	-0.8143	-1.1611	-0.4448	-0.3692	-1.1004	-0.7661	0.3621	0.3993	1.3439	1.2214	0.7	0.0289	0.7968	0.3773	-0.8969	-0.412	0.3491	-0.8534	-0.5835	-0.4511	-0.452	1.1176	0.231	-0.4116	0.3769	0.8195	0.7332	0.0253	0.7787	1.007	0.4513	0.5799
orf19.4255		-0.6508	-0.9801	1.1861	0.5983	1.4634	0.0094	-1.3407	-0.468	-0.1131	0.3897	-1.2747	-0.7794	-0.3831	0.3448	0.7815	0.4042	-1.6841	-1.8517	-1.2463	-1.1566	0.5679	0.3696	0.4715	-0.3019	-0.2788	0.5704	0.6627	-1.5951	0.0623	-2.1187	0.7913	0.5636	0.4434	-0.9297	-0.6148	1.0036	1.469	0.0682	-0.3973	0.0035	-1.0028	0.3057	0.1586	0.7913	-1.0898	-2.739	0.4077	-0.8449
orf19.7572	SPT7	1.1413	2.3658	1.4976	1.6834	-0.9459	1.4042	0.9979	0.3162	1.1797	0.1254	-1.1233	-0.7837	-0.4907	0.7327	1.7678	0.9332	1.9248	2.1881	3.129	2.4	4.586	4.0753	2.2952	0.0032	0.3579	1.2179	0.4355	1.1637	0.7797	1.2461	0.6377	1.6975	1.2012	0.559	0.4208	1.8593	0.9017	0.6018	0.4216	-0.8283	-0.7136	-1.0869	-0.4171	-0.1567	-0.1845	0.0652	1.2262	0.1792
orf19.7571	UBC4	-0.7551	0.4007	0.3582	0.8753	-0.8496	-0.6182	-1.0644	0.475	1.5004	0.9034	0.8602	0.1445	2.2052	-0.5437	-2.457	-1.5079	0.7423	0.3609	1.0368	0.8352	0.0386	-0.3045	-1.0983	-0.7386	0.5557	0.387	0.9291	1.3167	1.7463	1.615	0.7684	0.853	1.1906	0.6659	1.2163	1.4768	0.5481	-0.6635	-1.341	-2.0048	0.2387	0.6294	0.947	0.7074	0.4426	0.6218	0.3348	1.0385
orf19.3727		1.0817	-1.1256	-0.6702	0.128	1.7617	0.0764	0.8902	0.4745	-2.2463	0.6335	0.5337	1.0991	0.7231	0.3669	2.3348	0.6179	0.5192	0.0471	0.6854	-1.1202	-2.2826	-2.4102	0.8957	0.9942	-0.9576	-1.2467	-1.8955	-1.6092	-0.9756	-2.6389	0.24	0.4416	0.2417	-0.6345	-0.703	0.468	2.3114	2.6326	2.2215	0.9804	2.4989	3.1595	ND	-1.6154	-1.7516	-1.5573	0.3167	-1.4065
orf19.4621	YBR094W	-0.7582	0.1267	1.3486	0.5617	1.2368	0.8636	2.107	1.2755	1.3105	1.3513	1.1109	1.3142	-1.4503	0.7701	1.387	1.2159	-0.5406	0.4949	0.0338	-0.2863	-1.5152	-0.9733	-1.1867	0.7185	0.2773	-0.405	-0.8054	-1.248	-1.1199	-0.373	0.0814	0.7338	1.4388	1.3611	1.3393	0.5727	2.4227	0.6203	0.7124	0.7633	1.9162	2.1262	2.7048	-1.5371	-0.7729	-0.9972	-0.1367	0.2162
orf19.130	VPS15	0.4885	0.9094	1.428	2.1267	-1.5542	1.0104	0.7445	0.7823	0.2037	-0.2355	0.1358	2.0534	1.6227	-1.1313	0.4714	-0.4204	-1.9623	-1.4504	-0.289	-0.4037	1.2234	2.4872	-1.3471	-0.4149	1.3086	1.4811	1.9853	1.782	1.3945	2.095	-1.2934	0.8715	1.2298	0.6313	-0.8011	-0.114	2.3158	1.0145	-0.4088	-0.5507	1.3204	2.7495	2.0645	-0.4542	1.431	-1.2151	0.4393	0.932
orf19.3649	FES1	0.5995	0.7601	0.7024	0.9591	0.7599	1.6312	1.8046	1.1697	1.3777	1.9635	1.5044	1.9614	0.6915	-1.7385	1.5449	0.8825	-0.4321	-0.4148	-1.3248	0.4677	-0.7867	-0.8389	0.4842	0.769	1.4009	1.7673	1.559	1.391	0.9151	1.2642	2.0207	1.0786	0.9242	ND	1.0717	0.7079	0.8817	1.4673	0.9278	1.3646	2.4454	2.7413	0.5794	-0.6711	0.7467	-0.3975	0.4098	-0.3383
orf19.7445	VID24	0.8455	1.6183	1.1323	0.6519	0.1479	1.0364	0.3542	0.3848	1.5111	0.699	0.6356	1.4644	0.9878	0.4815	1.298	2.2261	0.657	1.3228	-0.3163	0.756	2.5571	2.5326	0.7581	1.2024	1.2845	0.8253	-1.9517	ND	0.1151	0.124	1.105	1.0946	1.1166	-1.1204	0.5892	-0.9759	1.1812	1.2512	0.4011	1.9652	1.0971	0.0642	1.3634	-0.3882	3.2331	0.5313	1.7909	0.4644
orf19.7327	PHO88	1.0386	-0.3973	0.4551	0.1939	-0.7258	0.6345	-0.4583	0.6502	0.1833	-0.483	0.2907	0.6936	-0.6165	0.3636	-1.6164	-1.1915	0.1652	-0.9659	-0.7693	0.7373	0.6891	1.5719	-0.6315	-1.1571	0.6868	1.0771	0.5034	0.1397	0.6456	0.1209	0.5048	0.2258	0.0621	ND	ND	1.1974	ND	3.359	ND	0.6811	0.0126	0.6575	0.5471	0.0525	-0.3633	0.4607	1.1339	0.1812
orf19.3205	MRPL36	0.6516	-0.0519	-2.4422	-2.8177	-1.189	-1.6196	-1.6782	-1.3929	0.0094	0.336	0.1542	0.2008	-0.4502	1.2675	-0.5472	0.1209	-0.5003	-0.9104	0.0365	0.3257	-0.6707	0.3336	0.2187	-0.5239	0.4612	0.5585	1.1557	-1.4789	-1.0408	-1.0737	-1.9319	0.0527	-1.2369	1.531	-0.7821	-0.2364	0.5023	0.3015	-0.1158	1.1344	-0.3736	-1.1908	-1.7243	0.4099	-1.8899	0.2003	0.4162	-1.8212
orf19.6634	VMA2	0.0923	-1.0363	-0.6644	0.3601	1.054	-0.1863	0.2342	-0.9658	-0.5353	0.1014	0.6347	-0.3761	0.4416	0.4911	-1.5785	-1.0416	-0.6315	1.3566	0.1958	-0.0885	-0.5874	-0.4818	-0.5091	-0.8674	-0.6859	0.0096	0.4323	0.2794	0.3836	0.9368	1.0552	0.8253	-0.1977	0.49	-1.1984	-1.608	0.5014	-0.1839	0.2904	0.3372	3.2512	ND	0.8375	-1.5288	0.1489	0.0699	-1.7208	-0.8943
orf19.5595	SHE3	-0.5695	0.7909	1.0162	0.9797	1.9409	0.8222	1.7978	-0.4626	-0.7533	0.6345	2.0165	-1.5865	-0.6288	1.3144	0.6383	0.4659	-0.8498	0.209	0.5646	1.0589	-0.8704	-1.4124	2.1499	1.8811	0.6797	-0.9282	0.0395	-1.2919	0.232	0.1537	-0.9642	-1.1168	0.2574	0.034	1.3198	0.3475	2.7172	-0.8685	0.3386	0.7417	0.5643	1.6771	-0.6181	-0.3855	-1.3808	-2.744	0.8637	0.7511
orf19.3539	YBR141C	0.7124	-0.7481	-1.2123	-0.7156	0.4321	-1.9494	-0.6414	-2.0561	0.0322	0.1294	-0.7843	-1.2486	0.3702	-1.677	-0.5009	0.3505	0.1669	-0.67	-0.1699	-0.3646	-1.4115	-0.7694	0.5946	-0.6451	0.2036	-0.6524	0.6721	0.0991	-1.0019	-1.0169	-0.7491	-1.0413	-2.2594	-0.445	-1.2288	-1.0376	0.3207	0.0085	-0.9992	0.8698	-1.6956	-0.5165	0.131	-1.1232	0.8828	-0.0442	0.1195	0.1195
orf19.2172	ARA1	0.203	-0.561	-0.4574	0.1477	1.055	0.1872	-0.338	-2.2177	0.1324	1.329	0.7161	0.0715	-1.3944	-0.3198	0.2612	-0.2295	-0.1631	0.5364	2.7994	1.2858	-1.6463	-1.6667	1.0708	0.3505	-0.6396	-1.011	0.1101	0.5821	-1.053	-0.7371	-1.6529	-1.4086	-1.0661	1.0078	-1.6803	-1.1918	1.0769	0.0829	1.4242	2.0577	0.4689	0.8162	-2.3171	-1.4732	-1.2003	-1.8964	-1.2251	0.5006
orf19.158	APD1	0.4644	0.1834	-0.258	0.1127	-0.8003	0.5824	0.7979	1.8643	0.9472	0.2981	0.5846	1.7312	1.3197	0.0781	-0.0385	-0.2732	-0.6066	0.3768	0.5228	-1.4172	-1.2769	-1.3551	0.2646	-0.3469	-0.4229	1.2929	-0.8417	0.6293	0.0441	1.3506	-1.4591	-1.742	0.826	1.338	0.0814	2.2713	-2.3705	-2.1538	-0.2191	0.9652	0.7351	1.0561	0.2235	2.1887	1.4094	0.931	0.613	0.1823
orf19.242.2	YSY6	1.7068	-0.5287	0.1784	0.6883	-0.7874	-1.2194	-0.9174	-1.6567	-0.9331	-1.185	-1.0265	0.5745	0.7416	0.7336	0.0071	-0.6009	0.1963	0.0859	1.0323	0.5332	-1.2229	-1.151	0.164	-1.8844	0.0343	0.342	0.097	2.2022	0.4971	-0.3971	0.6911	0.664	-1.4728	-2.004	0.2591	-1.3639	1.0498	2.0288	0.5321	0.563	-1.1313	-0.7603	-0.7026	-1.3736	0.2282	0.2421	-0.7204	-1.0648
orf19.4392	DEM1	1.6877	-0.7011	0.1645	0.7765	1.0635	-1.5768	-2.5362	-1.0075	-1.4116	0.0007	0.0007	-0.8198	-1.0053	-0.3186	-1.206	0.3298	0.5882	0.6063	-0.6789	0.1667	-1.6129	-0.9385	0.1012	-0.716	0.2153	-0.4729	0.0365	0.0775	-2.0427	-0.3139	0.0931	-2.0507	-1.3163	0.263	0.1818	-1.056	-0.9054	0.0806	0.0428	0.1544	-0.4929	0.2697	-0.5077	-1.5214	-1.0549	-1.6	-1.1145	0.4499
orf19.4603	ARL1	ND	0.2423	0.4401	-1.4219	0.0184	-0.3274	-1.7573	0.33	1.577	0.4053	0.4389	1.127	-2.7246	0.466	1.0566	-0.6392	1.1942	2.7229	-0.5895	0.1684	0.0317	1.3051	-1.9032	0.1805	0.749	0.5088	0.8798	1.3882	0.5068	1.4313	1.1041	1.0301	0.4684	-2.2862	-2.1928	-0.7019	-1.378	-2.4508	-1.1579	1.5054	2.5488	3.5235	0.1574	2.1701	-1.828	1.7871	1.4006	1.7226
orf19.3843	SEC66	ND	0.3151	0.0999	-0.5207	0.0876	0.2907	0	-0.046	0.6338	0.0008	0.0008	0.644	0.8018	1.3509	0.8076	1.5176	-1.8626	1.1474	-0.3911	-1.1983	2.0138	1.7564	0.7839	1.3121	-1.3314	-0.6591	1.1243	-0.1034	0.1337	0.0093	1.529	0.5419	0.118	0.7477	0.1256	-0.757	0.9462	0.0627	0.5155	0.1286	-0.6091	0.0369	0.0712	0.8197	0.2739	-1.768	-1.1752	0.2919
orf19.3457	SWD3	-0.1506	-1.0062	0.5898	0.3271	0.6918	0.4562	0.1426	0.6851	0.9203	-0.1726	-0.8864	0.8903	0.0608	0.1509	0.3532	0.2982	0.8881	2.7443	1.0465	1.0633	1.4834	1.049	1.351	0.2566	-1.081	-1.1133	-0.0528	-0.5491	-0.3241	-0.6465	0.3576	-0.4908	-1.9701	0.8181	0.6769	1.1906	0.0163	-2.0483	-1.0007	-0.5314	-1.5414	-0.3974	0.5881	1.9485	-0.4384	0.9117	-1.7375	0.6447
orf19.6057	ECM31	1.2089	1.1876	1.698	0.9511	-3.2535	1.1898	0.0123	0.6979	2.0019	0.2396	0.1796	0.7056	2.4384	-2.1386	-0.477	0.178	-1.9484	0.0328	-1.2158	0.3493	1.3006	0.6815	-0.6247	0.613	2.9161	1.9471	2.2893	0.3726	1.2794	0.914	-1.4793	0.893	3.1089	0.544	0.3598	2.4994	-1.0084	-1.2281	-1.4271	-1.6821	0.7119	1.3898	0.4833	0.7781	1.4569	2.2414	0.229	-0.5951
orf19.553	DTR1	-0.7458	-1.8451	-0.4361	0.002	0.5338	-1.025	-0.3732	-1.6216	-1.3299	-1.7141	-1.3547	0.5053	-0.421	-0.3693	0.6347	-0.6818	0.3676	0.3249	0.5567	-0.5938	-0.5546	-0.467	-0.8637	-1.3054	-0.3779	-0.5493	1.2861	0.1747	-1.3501	0.3743	0.6432	0.2502	-0.9227	ND	-2.6348	0.9783	-1.4034	-1.3576	ND	-0.9839	-0.5913	-0.4471	-1.3721	-2.2878	-0.8574	0.3186	-1.6737	-1.2135
orf19.4496	YBR187W	0.8855	0.3525	2.9858	0.8851	1.3483	-0.8515	-1.0318	0.5721	-1.3533	-1.3322	-1.5576	-2.4114	0.383	1.5603	0.3905	-0.6771	-1.4537	-1.4901	-1.2704	-0.4148	-1.2433	-0.9515	-1.5507	-1.9023	0.6169	1.1307	1.2098	0.7512	0.9108	0.3319	-0.8918	-0.9017	-0.865	0.346	-1.0836	0.0178	2.5705	1.2685	0.1128	0.1357	0.1412	0.7425	-1.4218	-2.0838	0.6243	0.4382	-0.5093	0.1402
orf19.3581	MSI1	-0.3919	-1.1879	-1.7101	-1.2845	-0.6837	-0.8075	-0.6526	-2.7157	0.4204	0.0325	0.6867	-1.3296	-1.3107	-1.7166	-0.8039	-0.3714	0.3571	-0.6884	-0.6001	-1.1392	-1.5476	-1.6287	0.2352	-0.1219	-1.2893	-0.9989	-1.298	-0.8265	-1.7885	-1.0257	1.4674	0.1734	-1.842	-0.5739	0.9191	-0.8831	-1.1442	-1.4923	-1.5871	-1.3464	-0.7664	0.0628	0.4595	1.6864	1.6856	0.1384	-1.1282	-1.0738
orf19.4475	KTR4	0.3849	-1.1146	-0.9833	-0.099	2.3801	-0.8579	0.9338	-0.6481	0.3514	0.7054	1.0793	-0.6091	0.0469	1.8098	2.0769	0.9416	-0.6062	0.7475	0.5012	1.2782	-0.7437	0.3042	1.308	0.8686	-2.3392	-1.8674	-0.925	0.7588	0.3784	-0.1174	0.2516	-0.8532	-1.6276	ND	-1.8664	1.4256	0.4895	0.4213	-2.1953	0.2139	0.1731	0.5229	1.3635	-2.4653	1.9714	0.7702	-1.519	0.3306
orf19.4883		1.1814	-2.1011	-1.3884	-0.4862	0.0488	-1.4211	-1.1236	-1.5971	0.2114	1.1109	0.97	0.2042	0.2667	-1.8109	-0.3211	-0.1976	1.149	1.1495	0.3559	0.4976	-1.4829	-1.1651	1.2291	0.1998	-1.3951	-1.0263	0.7108	0.8128	-0.9705	-1.2279	-0.9623	-1.991	-1.9371	-1.0936	-1.233	-1.1758	-2.1168	-1.0398	0.1276	-1.1228	0.231	0.1322	0.8058	0.0122	-0.9884	-0.7827	-1.2591	0.4475
orf19.780	DUR1,2	0.8839	-1.113	-0.7092	-0.3225	1.4727	-1.3812	-1.2765	-1.8097	-0.0479	-0.8412	-0.986	-0.8493	-2.1581	-2.3027	0.488	-0.2454	-1.2583	0.9636	-2.1978	-0.5592	-1.1949	-0.9992	1.0272	-0.7953	-0.7091	-1.344	-0.5198	0.4538	-1.4465	-0.9272	0.4876	-1.8022	-1.3145	2.0441	0.9028	-1.2487	0.1367	-0.2394	0.3731	0.4104	-0.9896	-0.3579	-1.7591	-0.976	-0.7518	-0.7235	-0.6455	-1.1052
orf19.5034	YBP1	0.5454	0.3892	0.7325	0.8071	-0.9595	0.602	0.4723	0.4719	0.2193	0.5029	-0.9929	0.2838	-0.3503	-0.6182	1.4251	1.9663	-0.8658	0.7172	0.5463	1.4595	1.1243	0.8333	0.8818	0.7876	0.8824	0.8379	0.9198	0.0901	0.1481	0.4239	-0.4487	0.1416	0.0497	0.3756	0.17	0.0729	-0.741	-0.4121	-0.9449	0.1615	0.2563	0.1671	0.1512	1.2019	1.1228	1.6019	1.0439	-1.1509
orf19.5033	ATG12	1.1967	1.7592	1.418	1.9756	0.1507	0.5882	1.0521	0.8851	-0.5409	-0.3749	0.2929	0.2282	0.267	-0.9672	0.6464	0.3739	-1.667	-1.0756	0.4263	0.3354	0.2466	0.1838	0.1802	-0.3325	0.15	1.2242	0.9445	0.1823	0.7761	0.9132	0.5415	0.6549	0.3851	0.2771	0.8869	-1.0277	0.3862	0.6637	1.1066	-0.6781	0.6781	0.8238	-0.986	-0.4107	0.5845	0.7639	0.0313	0.2097
orf19.789	PYC2	1.1056	-1.2272	-0.807	0.131	-0.4807	0.0499	-0.6285	-0.9644	1.2259	0.0008	0.0008	-1.5351	-0.69	0.6191	1.3388	-1.3939	0.6013	0.4683	0.6589	0.5253	0.1166	0.2454	0.1014	-0.4614	0.4181	0.6742	0.656	0.9081	0.7767	0.6026	-1.5634	-2.1682	-1.7446	1.0885	0.2879	0.0984	1.5312	1.0722	-0.5257	-0.7837	0.2407	0.0617	0.2684	-1.46	0.952	0.3079	-0.6739	0.4821
orf19.972	SLX1	-1.1943	0.2787	-1.8485	-3.678	-2.5828	1.1398	0.8845	-0.6626	0.4265	2.1161	1.0847	3.4898	0.9836	-1.5308	1.1458	2.3302	-0.8481	0.1514	0.122	1.5738	0.0479	0.4973	0.1568	1.3951	-3.1518	-1.3161	-2.2495	1.4857	1.9454	1.6682	-1.8692	0.5305	2.4483	0.2781	-2.5043	-1.1648	ND	-2.1589	-1.6684	-2.2598	0.6231	0.7128	0.5862	ND	0.9309	0.5358	0.6193	1.6995
orf19.974	ROT2	0.3672	1.6659	1.1715	0.843	-1.0351	0.0401	0.5343	0.2641	1.322	0.847	0.3246	1.1049	0.9777	-1.571	0.4794	0.1373	-0.7949	-0.6621	0.5202	0.4917	-0.7081	-0.801	-1.6102	-0.908	1.0332	0.4625	0.1477	0.1419	1.1915	0.7769	-1.1662	-0.8164	0.4954	-1.1124	0.2433	-1.2119	-2.6464	-1.1186	-1.6025	-0.8347	-1.497	-0.1181	-0.2178	0.9788	0.0936	2.1672	0.6372	-0.3205
orf19.5771	PBP2	-0.8862	0.5574	-1.0506	-1.0856	-0.7215	-0.4365	0.2539	0.3195	1.0989	1.2881	1.3044	0.6585	0.7926	0.1316	0.3223	1.477	1.5348	0.33	1.1547	0.3238	0.3925	0.0318	-1.0912	1.2418	1.3731	0.9733	1.0889	-0.7632	-0.4684	-0.5392	1.5254	0.5591	-1.0405	0.4848	0.1804	0.5748	-0.5571	-1.458	-1.0424	0.4687	0.1601	-0.3336	0.2711	1.8902	2.2201	1.013	-0.19	1.8735
orf19.7459	YBR238C	0.2913	1.6003	1.6363	1.3691	-2.4006	1.2374	0.1288	1.278	1.3965	-0.4747	0.2307	1.01	-1.2469	1.1862	-0.7759	0.3288	-0.706	-0.2761	-0.8884	0.1487	-1.015	1.2872	0.1383	-1.0132	1.0796	0.7873	0.5026	1.277	1.5827	0.6662	0.4056	0.961	0.1673	-0.2264	0.6585	-1.3067	0.4606	1.238	0.5066	1.3709	0.3526	0.7112	-1.9546	-0.7331	0.158	-2.8735	0.2925	0.1222
orf19.1587		-2.1673	0.1422	0.4231	0.2735	0.0342	0.0683	-3.1989	0.4696	0.6359	1.3209	2.1538	0.7771	0.4235	0.4038	2.472	0.1288	1.788	1.067	-0.0256	0.193	0.1125	0.6751	1.2004	0.2475	-1.525	0.7455	-0.9929	0.0908	-1.7712	-0.4723	0.145	0.8088	-1.2259	2.3824	1.1648	-2.8594	0.5335	-0.7208	-1.9116	1.4618	0.2111	1.0298	0.7448	0.3325	2.9843	-1.9742	0.4608	1.4305
orf19.5505	HIS7	0.6744	1.3401	2.1143	1.7188	0.5561	3.4717	2.4926	1.3328	1.6842	0.702	0.392	2.3562	2.8819	2.1949	1.0683	0.7392	-0.9955	0.0795	3.6913	1.3306	0.6463	-0.5701	0.1869	0.9556	1.1663	0.3302	0.1944	1.4951	2.5687	2.013	0.8516	1.8488	0.6983	1.2183	-1.406	-0.6452	1.6891	1.898	ND	1.6094	2.0669	2.5859	0.2791	0.1225	ND	0.8818	0.4206	0.3874
orf19.2443	RGD1	1.5714	-1.0402	-0.5251	0.1852	0.3	-0.9094	-1.162	-1.3633	0.0384	-1.9798	-1.3291	-1.5061	-1.5335	-0.7002	1.0909	0.256	-1.4048	-1.4774	-1.3216	-1.1963	0.177	0.0843	-0.6615	0.3148	-0.6557	1.1091	1.4893	-1.3326	0.2391	0.6007	-0.3531	0.0457	0.2455	0.9533	0.2082	-0.9824	-1.2205	-0.5774	0.3045	-0.5796	-0.8827	0.1352	-0.5685	-0.5661	-0.9267	-0.794	-1.2155	-1.0399
orf19.7069	YBR261C	0.452	1.4862	1.5048	1.3868	-1.0845	1.9499	1.1711	1.4366	0.9394	1.033	1.5892	1.8289	-0.5254	-1.3121	-1.0924	0.4542	-0.148	-1.086	-0.7671	-0.5729	-1.3053	-1.4266	-0.9627	0.3174	0.086	0.5186	-0.3307	0.359	0.8803	1.3273	0.093	0.5521	0.8085	-0.5253	0.1802	0.1624	0.0058	0.2208	1.071	-0.5317	1.0592	1.0928	0.3956	-0.6756	-0.2278	1.6044	1.3946	0.8159
orf19.5808	YBR271W	0.7504	-0.2484	0.1796	0.5942	0.7354	-0.1858	-0.4347	0.2689	-0.9457	-0.9891	-0.7299	0.3618	0.082	1.4508	0.5202	0.1519	-0.5646	0.7087	0.0878	-1.0287	0.1417	0.9683	-1.0232	-1.3111	-0.505	0.0443	0.6851	0.9899	0.5582	0.126	1.5125	1.2033	0.6005	0.0092	-2.3082	0.1407	0.7193	1.7858	1.5095	0.7857	0.6477	0.4393	0.3896	-0.6731	-1.9999	-0.6153	0.5027	-0.3224
orf19.4534	UBX7	1.9478	0.5721	0.0729	0.2846	-1.2477	0.8308	-0.9353	-0.6415	0.1342	1.173	1.2435	0.1573	-1.2188	0.3224	-1.4461	-1.5474	-0.1294	-0.7536	-0.4657	-0.6303	0.69	0.3098	1.2127	2.476	-0.522	-0.4859	0.7614	1.7578	0.3873	0.2686	-0.8524	0.4308	0.3893	1.8315	0.4472	0.3508	-0.8387	-1.5318	1.1893	0.7973	-1.0693	0.1442	0.028	2.8253	-0.2457	0.5358	0.8699	1.266
orf19.3613	PAF1	-0.8721	0.145	0.0405	0.2978	1.1532	0.7822	0.6896	0.7403	-1.284	0.6899	1.1888	0.8075	0.0026	-0.64	-0.7293	-2.3897	0.0515	0.532	0.5585	-0.8026	-0.4081	0.1741	-1.0861	-1.0054	1.6755	2.3523	2.4979	-0.2888	-1.2089	-2.0601	1.9359	1.0601	0.9218	0.5998	0.7668	-1.5163	1.3614	-0.0638	-0.3494	1.6747	2.8453	2.0388	0.0142	1.1157	-0.5645	-0.4219	-0.5456	0.4389
orf19.5752	YBR280C	-1.2777	0.6711	0.6236	0.347	-1.285	1.8379	0.9437	1.0307	0.3973	1.2334	0.6429	0.0266	0.5097	0.0191	1.3815	0.2943	-0.4968	-1.1654	-1.5803	-0.3889	-0.4436	-0.9099	0.6201	0.9988	0.185	0.1284	-0.2021	0.3202	1.1088	1.2429	0.5516	-0.5392	-0.6001	0.4517	0.0819	0.5224	-1.0868	-1.33	-1.5398	1.062	0.3963	0.8727	0.9514	0.4992	0.0514	1.9552	0.8039	0.5818
orf19.3064	MRPL27	-0.514	-0.4861	-2.2891	-2.4732	0.0642	-0.8047	-1.1674	-0.7601	-0.4231	0.0007	0.0007	-0.9739	-0.3246	0.974	-0.1854	-0.719	-1.6242	-1.3875	-0.6865	-1.6261	-1.2299	-0.871	0.1308	-1.621	-0.8114	-0.6932	0.3801	-1.6616	-1.2086	-1.3994	0.8795	0.0674	-1.1739	0.3651	0.9934	0.026	-1.9019	0.0896	-0.817	-0.5721	-1.4545	-1.4061	-1.0885	0.4262	0.0454	-0.7897	-1.4934	1.4027
orf19.3591	APE3	1.2605	0.5532	1.318	1.6132	0.2294	-1.1374	-0.3872	-1.1134	0.2268	0.221	-1.7741	0.3162	-1.0171	1.6589	0.4399	0.3914	-0.4436	0.2566	0.5599	0.3092	0.6878	0.1484	-0.4948	-0.4502	-0.3781	1.2025	1.2735	1.2325	0.5315	1.705	0.6935	1.43	1.3458	ND	ND	0.2259	1.2163	0.6487	ND	1.3792	0.3769	1.6776	0.421	-0.7652	-2.409	0.3217	0.0163	0.7098
orf19.733		2.2348	-1.2646	-0.1011	0.3291	0.5063	-0.4941	-1.2166	-1.1764	-0.5241	0.0008	0.0481	0.2051	-3.4153	-0.7971	-0.4245	-0.6256	0.0329	-0.3272	0.3876	-0.1029	-0.9146	-0.8441	0.3867	-0.7402	-0.8488	-0.8247	0.5213	-1.2336	-0.1218	-0.293	0.4209	1.5447	-1.1628	0.171	ND	0.0461	0.4772	1.4472	0.8981	0.2288	-0.9672	0.1805	0.6687	-1.2735	-0.3482	0.5715	0.0941	-0.4152
orf19.1204	APM3	0.7893	0.7093	0.2848	0.7541	-1.7082	0.344	1.4206	0.0619	1.2011	0.7722	2.2206	0.374	1.1472	-1.7887	0.4996	0.3642	0.767	-0.8336	0.0381	0.0146	0.4504	0.0566	0.3744	0.6039	0.7004	0.0111	0.1444	0.0619	0.5105	0.0247	-1.5078	-1.2481	0.5961	1.1034	0.0394	-0.6615	-0.1581	0.4416	0.871	0.76	1.7058	3.0051	1.3539	0.8434	0.7311	1.2753	1.8523	1.1229
orf19.5869	BSD2	-1.121	-0.9888	-0.7193	0.0989	1.3765	-0.4433	0.122	0.0858	-0.9974	0.4944	0.2544	0.033	-0.4972	0.5327	2.3299	1.592	-0.9295	-1.017	-0.8785	-1.9133	-1.2497	-1.3296	1.3802	1.0087	0.7539	-0.9282	1.6313	1.3804	-0.1901	1.4542	1.4182	-0.8909	-0.5168	0.9098	0.9721	1.6269	0.3976	1.1889	-0.8233	0.6108	2.2409	2.752	1.0425	1.5342	1.3416	-0.0931	1.8923	2.1438
orf19.1308	YMR088C	1.1007	-1.2562	-1.6501	-1.2357	0.3537	0.0876	-0.7657	-1.3295	0.1736	-0.7321	0.0882	0.139	-1.7427	-1.4479	-1.1431	-0.5679	-1.8491	-0.2593	-1.0795	-1.8449	-0.6896	-0.316	-0.5259	-0.9003	-0.9945	-1.2659	0.4793	0.796	0.0973	0.5822	-0.3962	-1.8824	-1.8133	1.3346	-0.7174	0.8441	-0.8392	0.1724	-0.3332	-1.0978	0.2363	0.1959	0.0657	0.1623	-1.004	-1.05	-0.8746	0.1933
orf19.4599	PHO89	2.413	1.038	1.6156	0.9107	0.7253	-0.8004	0.8528	0.3245	0.2777	-0.8128	-2.0229	1.0081	1.4717	1.1057	0.6346	0.4557	0.0106	-0.7326	0.5928	-0.5894	-0.493	0.4178	-1.6827	-1.0929	0.0757	0.5062	1.008	1.2818	1.0742	1.9536	-2.1542	0.2989	0.3883	-1.7308	-1.7483	-1.5479	2.3804	2.319	0.6943	1.5542	0.6603	0.7039	-0.7109	-0.6662	-0.8585	-2.0576	0.2305	-0.1525
orf19.3981	MAL31	-0.7997	1.8146	1.7342	2.1266	-1.9753	1.2183	1.1923	0.6846	1.87	1.3094	0.6928	1.2873	1.3928	-0.8417	-1.0354	-0.0384	0.2042	-0.8963	0.1783	-0.448	-0.5981	-0.6836	0.4564	-0.228	0.8808	0.5972	0.8441	-0.7349	0.0565	0.1924	-1.9368	0.6619	1.7281	0.1481	0.3058	-0.1819	1.5301	0.5444	0.8094	-1.2271	0.352	0.9792	1.0666	-0.3902	0.6479	0.05	1.0322	0.0817
orf19.4650	ILV6	0.1124	0.0433	-1.2247	-1.3978	-0.5726	-0.6978	0.0804	0.2133	-0.6763	1.4875	1.255	-0.1517	-0.4447	0.8609	2.6923	2.4566	0.4003	1.0491	-0.714	0.8991	1.9041	1.7135	2.3068	2.9069	1.8591	2.2378	1.9059	-0.3264	-0.2724	-0.3542	0.4722	0.1341	0.2088	0.6487	2.3053	1.6291	-0.4298	0.1553	0.4433	0.7393	2.4368	1.3735	-0.0258	1.1634	0.1331	0.2974	-0.4246	-0.6904
orf19.7074	SGF29	0.7705	1.4764	1.8744	ND	-0.8806	2.106	1.1927	1.3412	1.7337	0.822	1.1432	1.8733	1.3733	1.9932	0.0593	0.147	1.2922	1.6671	1.2613	1.6861	0.0292	-0.3728	0.6872	0.9555	0.6911	-1.2808	0.2663	1.8698	1.9319	1.8014	0.0162	1.0099	1.5553	-1.1566	0.1092	0.4151	1.813	ND	2.3748	-0.815	0.5693	0.5319	0.1291	-1.0658	1.8756	-0.7806	0.4685	0.9856
orf19.7083	DCC1	0.7358	1.5248	1.6424	1.4685	-0.6201	1.3007	1.1907	1.3099	2.0255	-0.7003	0.4476	1.6475	0.8045	0.3843	0.3447	0.2778	-0.5818	-0.3297	-0.0741	-0.8865	-0.6525	-0.4257	0.2903	-0.5476	1.3071	0.7069	1.6041	1.0047	0.5941	1.3846	0.0148	0.3196	1.5508	-0.7395	0.9155	-0.5055	0.5589	1.094	0.6595	0.0816	0.6856	0.7002	0.1352	-0.4525	-1.1777	0.6619	0.2565	0.4928
orf19.7080	LEU2	0.4625	1.0588	1.2429	1.6909	-1.3871	0.7414	0.0273	1	1.556	0.3136	0.3068	2.1903	2.6657	-0.5773	-1.2316	1.0154	-1.8617	-0.5519	-1.0098	-1.6959	0.1003	0.4095	-1.377	0.3261	1.8821	1.2523	-0.2645	0.7332	2.2023	1.9371	0.3543	1.7634	1.6244	0.9559	0.3138	-2.0183	-1.8117	0.2106	0.0149	-2.7803	0.4226	0.6648	-1.1532	0.0407	-1.9571	0.6387	0.7779	0.2719
orf19.5639	HIS4	2.6598	1.0726	1.305	2.015	-0.7442	2.3414	1.85	-0.2817	2.9602	1.0372	0.4171	2.4547	1.0813	1.0489	0.165	2.0186	-0.3125	-0.6171	1.0102	-0.8653	-0.7289	-0.9355	-1.6027	1.8794	0.6837	0.692	0.1563	2.3901	2.1156	1.8759	0.4467	0.4243	0.8312	-1.1238	0.8023	-0.2757	0.8384	0.7736	0.0015	0.2529	0.5204	1.9438	-0.1239	0.1987	0.1537	1.3921	0.9424	0.2344
orf19.3292	YCL033C	1.0812	0.8801	2.4676	1.5698	-1.2453	1.6321	1.1396	1.1509	0.5239	0.5735	0.8242	1.0778	0.949	-0.7155	2.3832	0.6625	-0.6723	1.0029	1.5949	1.1677	0.689	2.1177	0.3161	-1.0814	0.316	0.7591	1.3533	2.2953	1.386	1.3929	-1.081	1.5756	1.9805	0.81	0.3642	-0.4236	0.3757	0.6736	0.8748	-0.908	2.9132	0.9122	-1.609	0.1376	-0.2546	2.3435	1.2955	-1.3405
orf19.552	ATG22	0.9897	-0.5899	-0.2051	-0.2507	0.3887	0.2595	0.154	0.0419	-0.5969	0.0008	0.0008	0.9504	-1.1846	0.448	0.8846	2.5398	0.6521	0.7427	-0.5582	0.7598	0.4787	0.6254	2.5139	1.3574	-0.5668	-0.0689	-0.3308	-1.4281	-0.9784	-0.6943	1.7644	0.8399	-0.176	0.6115	1.1384	-1.041	-1.1175	-1.3085	-1.696	-0.495	-1.0977	-0.5129	-0.3345	0.9333	1.0498	-1.2219	0.3221	-0.2145
orf19.5131		0.4018	0.9905	1.133	0.863	1.2311	1.0159	1.223	1.5226	-0.3178	0.4868	0.3832	0.7694	0.7884	-0.4238	0.4307	-0.5852	-1.7504	-0.963	0.4029	0.04	-0.9406	-0.9731	-1.3739	0.3161	1.1765	1.32	0.2053	0.3465	1.3216	0.809	-1.0705	0.1023	0.5899	0.0484	0.3827	-0.4914	0.6022	1.5995	0.4452	0.8723	1.0651	0.9436	0.001	0.1971	0.5531	-0.6509	0.2015	0.1077
orf19.734	GLK1	0.5577	-0.9579	0.0914	-0.2918	0.0787	-1.5212	2.9763	-2.0499	0.5835	0.2162	0.4004	-1.4792	-1.1404	-1.3241	-1.3161	-0.2857	-1.4793	-1.6583	0.8921	-1.058	-1.2382	0.467	0.5653	-2.2759	0.1716	0.548	1.1988	-0.9237	0.9534	0.276	0.3311	1.0436	-1.7262	0.6302	0.5328	-1.8184	0.4085	0.4814	-1.7205	-0.5332	-0.3961	-0.2059	-0.4151	0.7213	0.5618	0.8222	-0.1995	0.219
orf19.4953	YCL047C	0.4953	0.4973	0.1748	0.4034	0.1531	1.2616	1.8729	0.3818	0.2156	1.412	1.6149	-0.4088	-0.3951	-1.4979	0.1008	1.4366	1.4811	-0.7162	0.1793	-0.1969	-0.9668	-1.1629	0.5866	0.0928	0.5401	0.8477	1.2326	0.9625	0.9466	1.2365	-1.1818	0.2967	0.725	-0.5187	1.2125	0.1605	0.7269	1.1258	2.0815	0.3138	2.2597	1.9659	0.9653	-0.3565	-2.2293	-1.5129	1.0084	0.3315
orf19.3736	KAR4	1.2775	-1.847	0.0436	0.4137	2.5767	-1.2187	0.3956	-0.1957	-0.5811	2.0286	1.885	-2.2288	-1.5306	0.7892	1.1099	0.1423	0.2868	0.9739	0.7492	0.5831	-1.0803	-0.8414	0.8385	0.8334	-1.06	-1.5865	-1.0349	0.7471	-1.2993	0.6868	-1.4111	-2.7117	-1.9741	-1.9982	1.6362	-0.4018	0.3347	2.9039	0.6955	1.2703	0.9825	1.0639	0.4645	0.0347	ND	-0.7953	0.068	0.0748
orf19.434	PRD1	-1.0537	-1.8459	-1.8877	-1.4166	-0.5216	0.1975	0.5654	-2.6182	0.5158	-0.9469	1.1838	-1.5012	-1.2965	0.1698	1.4588	0.2694	0.2569	-0.1986	0.1934	-1.2444	-0.8622	-0.7869	0.3963	-0.648	-0.4347	0.8072	0.0629	1.2353	-0.1161	-1.5943	1.1892	0.2948	0.3166	-1.7087	0.2305	1.102	1.2891	0.9181	0.5792	-0.244	-0.8573	0.3729	-1.3169	0.5312	1.737	-0.97	-1.1505	-0.7471
orf19.7404	CHA1	0.4356	0.5325	0.4523	0.4686	0.8038	0.581	0.6984	0.4166	0.2475	0.8176	1.7478	-0.5891	0.0644	-0.1534	0.8915	1.9527	0.7258	-0.4185	0.0523	-0.906	-1.9427	-1.7428	0.8612	1.0935	0.0061	0.6728	-0.9215	0.4821	0.4281	0.1137	-1.1672	-1.4161	-1.1811	0.2022	-2.4828	0.5441	0.135	-0.8102	-0.4164	0.9306	0.9475	1.0931	-2.5295	0.3934	0.6673	-1.2131	0.9421	0.2779
orf19.548	CDC10	0.6012	-1.7584	-1.5739	-0.7904	1.0509	-1.4395	-0.7865	-0.9867	-1.6464	0.2618	2.7446	-1.1107	0.6304	-2.4586	0.4885	0.4348	-0.9391	0.7259	0.0566	-0.5093	-1.7233	-1.6342	1.0606	-0.4688	-1.1469	-0.6866	-0.5899	-0.5437	-1.7206	-1.3615	0.9964	0.1503	-1.5184	2.3739	0.9121	-1.4037	0.245	-0.5332	0.0373	0.1678	-0.9501	0.068	-0.64	0.2614	0.4054	-0.9343	-1.339	0.5696
orf19.3854	SAT4	-0.8327	0.1327	-1.4214	-1.8001	-0.6952	-1.0033	-0.8371	0.3412	0.0357	-0.4313	-0.5777	-1.137	-1.7221	1.0364	0.6997	0.4155	-0.6084	0.1281	-0.2514	-0.3858	1.1523	1.2312	-0.1242	0.6986	-0.6849	-1.0326	-1.8409	0.5387	0.6426	1.5618	-0.0892	2.0167	1.8839	0.2798	-1.302	-0.6787	0.162	-0.6752	-0.3625	-0.5845	-0.7064	-2.5142	1.264	-0.3006	0.7173	-0.1513	-0.6419	-1.8741
orf19.7124	RVS161	0.8029	1.4345	1.4395	2.4308	-0.322	1.6298	1.6009	0.7141	-0.7444	0.5018	0.4734	1.6466	2.3346	-0.7678	-0.2904	-0.5969	-0.5696	0.4037	-0.3881	0.0697	0.3287	0.2223	-1.0823	-1.0204	1.7694	1.2403	1.7597	1.5487	2.2025	2.8485	1.3625	0.9841	1.2923	-0.9067	0.1174	0.1888	0.0993	1.38	1.4068	-1.8835	0.3256	0.8773	0.399	-0.7063	0.2744	-0.9453	0.8448	0.2384
orf19.1224	ADY2	-0.4937	0.1601	-0.6045	-0.0309	0.4282	-0.3234	-0.7502	0.1207	-0.4707	-1.1644	-1.0554	0.1294	1.5265	-0.8049	0.3233	-0.6336	0.3872	-0.1699	0.2407	-0.8387	-0.1213	-0.3669	0.3616	0.5572	-0.5084	0.0507	0.3923	-1.1911	-1.0309	-0.2792	0.9841	0.9002	0.0998	0.3823	0.7956	-0.5246	-1.0445	0.2474	0.5724	-0.8762	-0.5051	-0.284	1.5219	0.3732	1.3348	-1.4711	-1.1169	-0.1103
orf19.459	ADP1	0.8675	0.5745	0.026	0.4533	2.2593	-1.0086	-1.1003	-0.3984	-2.89	-1.1351	-1.4877	0.7846	-0.8848	0.3343	-0.8972	-0.8896	0.8301	-0.8056	-0.9713	-0.8264	0.4714	-0.2858	-0.6572	-1.2192	0.4336	0.1756	1.275	0.0101	-1.4784	0.0195	1.4019	1.9326	-0.5354	-0.8798	-1.1738	0.5867	2.7657	0.2879	2.4402	-1.3219	-1.5274	-0.437	1.5956	-2.2968	0.3012	0.8278	-0.1781	-1.5548
orf19.6730	YCR016W	0.3431	0.4602	0.7416	0.7545	-1.5097	1.4627	0.5024	0.3113	0.5507	-0.9644	0.3907	1.5551	0.9814	-1.8765	-0.3555	0.1602	-0.8087	-1.7682	-1.5371	-0.9419	0.6312	0.4733	-1.3305	-0.2925	1.1042	1.2658	1.5126	0.3973	0.9196	0.8662	-1.8834	-0.8621	0.673	0.119	1.1091	-0.7444	1.0583	0.2809	-0.1945	-0.2141	-0.8695	0.4806	0.898	1.0092	0.4063	0.8537	1.4561	-0.7332
orf19.4548	MAK32	0.1807	0.6062	0.756	1.4848	1.3595	2.6701	1.1748	1.9208	0.6806	1.5805	1.2669	-1.0362	-0.3391	2.2461	1.1971	0.8393	0.2627	-1.2753	-0.2105	0.7021	0.1608	-0.65	0.5472	1.6853	0.833	0.6539	0.0531	1.1206	0.8767	0.6833	0.6081	-0.6077	0.5848	-1.3775	3.4724	-0.3823	0.6555	ND	1.6152	0.5955	1.2752	1.3091	-0.3098	-0.5299	0.6789	0.5277	0.4105	0.1005
orf19.7330	PET18	1.5151	0.4762	0.864	1.5978	2.1687	0.3613	0.9687	0.5692	-0.921	0.122	0.4242	-0.5587	-0.5308	1.966	1.1249	0.3167	-1.6923	0.5515	-1.567	-1.202	-0.5971	0.3871	1.099	-1.452	0.6361	-0.1701	-0.5744	1.1092	0.1031	0.9619	-1.0838	0.8274	1.6687	1.283	0.496	-0.8095	-0.9371	-0.4904	0.4531	1.3719	0.9173	1.0114	0.4	-1.1565	-1.193	0.4489	-0.3853	-1.235
orf19.4526	HSP30	-0.5638	0.6467	1.096	1.0595	1.1606	1.4731	1.4975	-0.5788	0.3037	1.8959	1.4651	1.0689	-0.2803	0.1401	0.3507	0.2611	0.7251	0.2575	0.8374	1.6694	-0.776	-0.8749	-0.1273	1.6752	-0.5238	-0.1533	0.3453	1.018	-0.6167	0.2891	0.181	0.3077	0.6839	-0.3672	-0.3398	0.0017	0.8324	1.3147	1.8695	0.218	1.5635	1.3546	1.36	-0.4347	-1.0483	0.6957	0.3431	0.2063
orf19.4550	YCR023C	0.8296	0.3555	0.4388	1.3928	-0.9413	0.6917	0.7733	-0.3964	0.4863	0.1945	0.2654	-2.2226	0.0992	-1.4418	-1.1141	-0.6277	-0.8672	-1.3479	0.4917	0.1474	0.8645	-0.3087	0.3957	-0.7008	1.1312	0.8084	0.9141	0.8928	0.5283	0.8859	-2.3312	-1.3689	0.2656	-1.8665	-2.202	-0.3761	0.6232	1.1189	0.6622	1.3849	1.7878	0.9072	0.0391	0.1505	-0.9388	1.9533	0.8	-1.0624
orf19.5994	RHB1	0.3757	0.018	0.1554	0.343	0.7295	-1.7227	-1.3703	-0.4579	-0.9044	0.0008	0.0008	0.6524	1.6988	1.3391	1.4648	0.3718	-1.0069	-1.5105	0.0193	-0.451	-0.5235	-1.1278	0.4475	-0.7666	-0.9241	-0.6069	-0.6277	-0.5933	-1.5859	-1.3159	0.9513	-1.6834	-2.0745	1.0697	1.2652	1.4174	1.1748	1.5036	-2.0893	0.4272	-1.2883	-0.4186	0.0957	-1.1154	1.3215	1.4611	-1.0229	-0.7381
orf19.5535	FEN2	-1.412	-0.4547	-0.375	-0.2091	1.9919	-0.129	1.0926	0.1655	0.0906	1.1883	0.763	0.1238	-0.7438	0.0311	0.2326	0.9001	0.2389	-0.1745	0.3109	0.0073	-0.8945	-0.2073	0.5216	1.0545	0.047	0.3851	0.2323	0.0512	-0.9078	0.7837	0.0163	-0.8914	0.0443	-0.9256	0.2605	0.3874	0.5449	0.7078	1.2177	0.5901	0.5808	1.1217	1.0639	0.2601	2.0376	0.1297	-0.5734	0.1526
orf19.5671	SYP1	-0.4838	1.1347	1.0408	1.1404	-2.0239	0.976	0.2792	1.1202	0.1744	0.0543	0.4226	1.6571	2.7057	0.3024	0.714	0.7351	0.1553	-0.6616	-1.9976	-0.2493	-0.6869	0.2063	-1.8183	-1.0202	1.7022	1.3931	1.714	-0.713	1.0734	-0.1016	-0.6691	0.3541	1.6804	0.4578	0.4835	-0.2976	2.3202	0.207	1.0633	-1.1421	0.0226	0.8877	0.4743	0.6839	-1.5919	1.8814	1.7189	1.3777
orf19.908		0.4074	-0.7031	-1.4861	-1.3378	-0.7297	-1.5683	-1.7608	-2.1058	-1.6176	0.2905	0.3085	-1.6393	0.2781	0.3313	-0.442	-0.8407	-0.2825	1.123	1.0081	0.4321	-1.3442	-1.0603	0.132	-0.7559	2.4702	1.283	2.2802	-0.6061	-0.9336	-0.6858	1.0248	0.654	0.6824	0.3514	1.0392	-1.0808	1.58	0.4382	0.4575	0.6906	0.9379	0.6617	1.5193	-0.5275	-0.622	-2.4758	-0.0702	0.1279
orf19.2454	PHO90	0.3689	0.3338	-0.9531	0.0192	0.3587	-1.2848	-0.5322	-0.7616	0.3711	-1.1365	-1.5031	0.2528	-0.6737	0.1385	0.7323	0.6071	0.746	1.1623	0.6425	0.3302	0.3541	0.9969	-0.6951	-1.0617	0.4546	0.0441	1.4473	-1.2545	0.5151	-0.6568	-0.4871	0.0125	0.0356	0.7397	-1.2497	-0.8092	0.4555	-1.9008	-1.2358	0.2548	-1.4161	-0.717	0.2695	1.0973	-2.1507	-0.4777	0.2356	-0.6544
orf19.4240	PER1	0.4891	-1.3011	0.8611	0.0829	1.3403	-0.2478	-0.555	0.8121	-2.4034	0.9595	1.6536	-1.0739	0.3434	1.0894	0.7505	1.0349	1.145	1.0988	0.7049	0.2413	0.8552	1.2986	-1.1206	1.0077	0.4749	-1.8127	-1.1143	0.3751	0.0472	0.7406	0.5207	1.1498	1.0345	0.6625	0.4275	-0.2855	0.7252	0.5479	0.2535	0.6786	0.1318	0.8906	-0.8086	-1.1428	-2.4561	0.6131	-1.5987	1.6134
orf19.7463	YCR045C	0.2465	1.1201	0.8531	2.2496	0.0643	1.2245	1.4016	0.7674	0.5438	1.2812	1.8047	0.7535	1.4334	2.036	0.0758	1.0414	1.2814	0.7187	0.1669	0.1927	0.0469	-1.1558	0.9734	1.6451	1.4789	0.4451	-0.3526	-0.2444	0.2552	0.354	-1.0086	-1.522	0.1865	-0.2652	-0.8106	1.3879	0.0302	-0.7252	1.0919	0.5736	0.533	1.0822	-0.5646	0.034	ND	0.6556	1.3198	0.6911
orf19.1966	BUD23	0.5484	1.4993	1.1309	1.3808	0.003	1.5182	1.2572	0.2693	0.8356	0.8003	0.7442	0.664	1.842	2.2243	1.7381	1.6713	-0.7353	-1.954	1.341	-0.1797	-1.0344	-1.6124	0.686	1.726	0.7025	0.8478	0.7046	0.2625	0.708	1.2741	-0.9561	0.258	1.2918	-1.998	-1.661	-0.8053	0.5857	0.5655	-1.5489	0.3124	2.4656	2.4537	-2.4969	-1.8833	0.3199	-1.4603	0.96	1.6013
orf19.4233	THR4	0.0829	0.2012	0.4701	0.5905	1.0453	-2.096	-1.6051	-2.4393	0.0458	-1.2072	-0.8095	1.1972	-1.9295	2.3449	-0.2895	0.1096	0.0233	0.3505	-0.6934	-1.5848	-0.6993	-0.0715	0.2223	0.9255	0.3767	0.6544	0.0453	1.1773	0.0991	0.2236	0.2978	2.118	0.7047	1.6736	-1.585	-1.0475	0.361	-1.0929	0.0277	0.698	2.2522	2.5621	-1.1697	-2.1414	-1.5028	1.0869	0.6211	0.2095
orf19.3273	YIH1	0.2479	0.3185	0.8508	0.5466	-0.7482	1.3256	1.2762	1.5321	0.3489	1.081	1.7837	0.054	0.6496	0.4036	0.3553	0.2042	0.1255	-1.4277	0.1228	-0.2323	0.2494	0.2692	0.9798	0.5788	0.9067	0.5247	0.2874	0.3426	0.4853	0.7111	0.5324	-1.7276	0.9368	-1.2557	0.3119	1.7256	-1.1527	-1.2392	-0.2595	0.1223	0.4669	0.4989	0.0146	1.1573	1.0434	1.4059	1.2098	0.7548
orf19.4855	BUD31	1.229	-0.5807	1.5237	0.9086	-0.8534	0.1756	0.7398	-0.1492	2.0516	0.0008	0.0008	2.172	1.2793	-1.7782	0.655	0.3582	-1.1656	0.0665	0.0175	0.559	-0.5028	-0.5065	-0.9449	-0.5955	2.5007	-1.0199	1.3593	ND	-1.5084	-0.6568	0.8309	-0.4998	0.27	1.4992	1.224	-1.1414	ND	ND	2.6256	0.2509	1.1882	1.0276	-0.9414	-0.6779	-0.6314	0.6008	0.6922	-1.8201
orf19.3412	ATG15	0.6941	0.5837	1.6358	1.4726	2.2049	0.8524	0.5509	1.9754	0.5437	0.0004	0.1265	0.8136	-1.5391	3.3947	0.436	0.7688	0.3617	0.8607	-0.6078	-0.7436	1.4428	2.0377	-1.1861	-1.3857	0.3391	0.0473	0.6629	1.2371	0.3832	0.8195	1.0419	1.6258	-0.1297	2.1491	1.2975	1.7485	2.8083	3.3749	1.4138	1.2602	0.3221	0.8408	-0.7098	-1.8175	-0.7901	-1.8865	-0.474	0.6134
orf19.1355	SOL1	0.8013	2.6195	2.4945	1.8526	-1.3645	0.7859	1.2161	1.1451	0.4121	1.4616	1.0957	-0.9008	1.1461	-1.8083	2.0298	1.7652	-1.3822	-0.7586	-2.3506	1.1014	-0.2673	0.4277	0.5592	0.1251	1.9658	1.5161	1.6764	-0.8922	0.9057	-0.5497	0.0865	-0.8362	0.6122	1.3179	0.4318	-1.0967	0.878	0.153	0.3469	0.2775	0.3858	0.7285	0.4556	0.3104	1.3493	0.8503	0.5983	-0.7466
orf19.3792	PAT1	0.4896	1.3977	1.5821	1.7472	1.279	1.005	1.4561	0.806	0.7372	0.0833	0.7542	-0.5139	0.336	0.5664	-0.7559	-1.8465	0.2146	0.9111	-0.3745	0.2447	-1.0294	-1.316	1.559	-0.4762	2.8824	3.0311	2.9045	0.0696	-1.5684	-2.6313	0.3318	-0.7577	-2.0204	-1.3685	1.2141	-0.631	1.3668	0.336	1.3002	1.5664	ND	3.8547	-0.2664	0.6744	-0.5916	-0.9626	-0.7034	-1.0324
orf19.3705	YCR079W	1.1104	-1.1021	-0.2789	0.2507	0.9082	-2.043	-1.1152	-1.2756	-2.3229	-0.6932	-1.5318	-1.6204	-1.4064	0.4569	0.3115	-0.199	0.3541	0.141	-0.917	0.6919	0.6	0.2582	0.1934	-0.3891	-0.9086	-1.402	0.1579	-0.9149	-1.6804	-1.5945	1.3026	0.4345	-0.8707	0.3133	0.2763	-2.4463	1.1043	0.1702	0.3624	-0.5483	-1.1084	-0.2043	0.8232	-1.5653	0.0314	0.2187	-1.4544	0.0861
orf19.5517	ADH7	0.7888	0.3846	0.5139	0.1107	1.0836	0.362	0.4216	0.0182	0.8955	-0.6971	-1.4356	-1.1307	-1.9259	-0.8114	-0.4371	-1.5037	1.389	0.8621	0.2299	0.2377	0.749	0.5402	0.145	-0.5483	0.0987	1.3445	1.1128	-1.3097	-0.0653	0.1007	-1.5731	-2.307	-1.2254	0.5302	1.6499	2.1847	0.4935	-0.7909	-1.0423	0.587	-0.7289	-0.888	-0.7479	2.7571	-1.2524	1.0923	-0.8549	-0.6811
orf19.7678	ATP16	0.6138	0.5125	-1.0474	-0.8669	-0.528	0.8085	0.6986	0.879	1.1114	0.2121	0.7947	0.9006	0.9046	0.0263	-0.6697	0.3096	-0.576	-0.5081	-0.6158	-0.87	0.2008	0.6432	-0.3978	-0.384	-0.264	-0.0845	-0.7093	0.142	0.3397	-0.8067	0.0598	1.5819	0.5621	-0.8118	1.0078	-0.8078	-0.5968	0.6088	0.0896	0.2439	0.5852	0.5986	-0.5492	-0.7866	-1.541	0.1488	0.3041	-1.1965
orf19.831		0.2948	-0.2091	-0.6863	-1.2573	1.8456	0.3672	0.3112	1.1124	0.199	-0.1786	-0.2899	0.4527	0.1976	0.7148	0.6874	-0.787	0.0628	0.8261	0.2279	1.3189	2.3114	2.145	0.7242	1.0536	-0.9659	-1.2617	-0.9506	1.0829	2.4354	2.4293	0.5926	2.325	1.9475	-0.3706	-0.895	-1.8055	-1.2997	-0.9834	-2.0491	-0.16	-0.9305	-2.4624	2.8448	0.1129	0.7732	-0.2019	-0.3071	-2.0585
orf19.1542		-1.1339	0.1895	-1.6891	-2.6476	-0.5798	-1.2581	-1.0201	0.2702	-0.6474	-0.4243	0.3002	-0.8958	0.7779	0.8551	-0.1011	-0.5148	0.2868	0.4186	1.0564	-0.6763	0.6515	-0.6534	0.5918	0.9148	-1.8553	-2.1308	-2.6591	0.9276	1.9764	1.4372	0.3532	1.2396	1.141	-1.1189	-1.276	-1.185	-0.2718	-1.1228	-0.3154	1.675	-0.4005	-3.2497	1.2803	-0.3874	0.9226	0.246	-1.0236	-1.1989
orf19.3558	ERP3	0.3398	-1.4985	-1.487	-1.1808	0.3931	-0.6326	-0.7281	-1.3075	-0.9369	-0.8696	0.0105	-1.849	-1.6664	-2.6843	-0.8506	-1.0592	1.6739	0.1521	0.6479	-1.1103	-1.2942	-1.1769	0.5236	0.29	-0.459	-0.7213	0.7901	-1.0055	-2.2609	-0.3572	0.3103	0.3337	-1.5327	-1.7609	0.3585	-0.9082	0.927	1.2438	0.0975	0.4852	-1.7016	-2.404	0.4687	-1.1454	0.55	0.2297	-0.8471	-0.4632
orf19.1069	RPN4	0.057	0.5112	0.125	-1.0001	0.3411	1.9102	2.2756	1.0725	0.0003	0.2087	1.4851	-1.6308	-1.2106	0.5647	-0.6823	-1.8801	0.3315	0.2876	-1.0511	-1.6887	-2.3169	-1.0424	0.3778	0.3888	2.228	3.6855	3.3808	1.2146	0.9482	0.118	0.8467	0.3107	0.1537	1.8622	-0.5763	0.7359	1.3518	-0.8804	-0.4502	0.1945	1.9629	1.6037	1.1581	0.4555	0.3005	-1.8362	0.3664	0.9547
orf19.7245	MTO2	0.8033	1.0326	1.3528	1.0426	-1.3022	0.2885	1.396	0.685	1.2283	1.1908	0.3198	0.6007	0.3611	-1.6037	-0.5297	0.5131	-0.7916	-2.8874	0.0879	-0.649	-0.2219	-0.3331	-0.9864	-1.382	1.3726	1.6587	1.0362	-0.9176	0.3558	0.2179	-1.2642	-0.7274	-0.2163	-1.7384	0.6547	-1.1797	-0.5381	0.1549	-0.9848	-0.2504	0.2222	0.2807	0.0479	0.8201	0.1544	1.0821	1.2948	-0.396
CaYDL037C		-0.4454	0.6422	0.759	1.0135	1.0115	0.5407	0.9388	0.114	0.7493	2.0075	1.3832	0.1421	-1.536	1.5472	1.9034	1.1887	-0.45	-0.3672	1.0161	0.5687	-0.5802	-0.7259	0.4111	1.3994	-0.5001	0.0807	-0.696	1.0842	0.9208	1.4211	-1.3727	-2.0812	-0.688	0.2592	0.0407	1.3059	1.3171	1.1085	0.1625	1.9031	1.3627	1.3658	0.386	0.2963	-1.8479	-1.8124	0.1342	2.0369
orf19.4761	HST1	0.3245	-1.5473	-1.7727	-1.6452	-0.5643	-1.1757	-0.9359	-2.1282	-0.7996	0.2044	0.0007	-1.6457	-2.3408	-2.0136	0.1968	0.402	0.1491	0.5853	0.4628	0.688	0.3829	0.838	0.6551	0.0227	0.3929	0.3135	0.2595	-1.8141	-1.0282	-1.4119	0.7911	-2.6692	-1.1341	0.5327	0.0683	-0.3849	0.992	1.7686	1.1049	0.2462	-0.5142	0.3744	0.6544	-0.2673	-0.8827	-1.7246	0.0842	-0.5938
orf19.250	SLC1	1.2623	0.269	0.4684	0.7891	-1.1743	0.1535	-1.0217	0.0955	-1.8583	0.0007	0.0007	0.1136	0.9457	0.4745	0.5346	-0.0545	-0.7043	0.0607	-1.5209	-1.0632	0.566	-1.3795	0.3515	0.1747	-0.5688	0.0644	0.8149	0.0158	0.3771	-1.088	-0.2556	-2.2288	-1.3201	2.2079	1.6378	0.1921	-1.3478	0.3839	1.2152	0.4508	-0.3374	0.6337	0.5702	-0.9056	-0.6861	-0.5134	-0.9551	0.5364
orf19.1564	YET3	-0.4997	-0.9101	1.092	1.4987	1.5898	0.6659	0.8661	2.467	2.2577	1.3683	1.1276	0.3312	0.2156	2.9912	0.8145	0.4916	-4.1377	-1.5974	0.3044	-1.3612	-0.53	-0.7055	0.8066	0.3661	-1.9752	-0.5293	-0.3421	0.6194	0.4226	0.7407	0.0225	1.1993	0.5312	-3.4466	-0.8362	0.0734	1.4479	0.5629	0.8521	1.1532	1.9199	1.4388	-0.7542	-1.9485	-1.1472	-1.2003	0.0069	0.7052
orf19.976	BRE1	0.735	0.8419	0.6656	1.1384	-1.5648	0.7509	1.0892	0.0331	0.3589	0.4873	0.5675	0.9058	1.7986	-0.8708	1	0.69	-2.0688	-2.5556	-2.1239	-1.9483	1.2663	0.5088	-0.8134	-0.7047	1.8771	1.921	1.9435	-1.4261	0.2803	0.3306	-2.0135	-2.2607	0.7108	0.4409	0.4183	-1.3469	-0.7392	0.6002	-1.0574	-0.9376	-1.8392	-0.9821	-0.9046	1.2482	1.0423	2.1355	0.9367	-0.2563
orf19.5323		0.8468	0.6628	0.8573	0.9345	0.0225	1.4603	1.4367	1.2867	1.5859	0.7304	1.3709	0.8787	0.5443	1.1839	1.7394	0.9559	0.5745	-0.723	-0.4545	-0.2495	-1.2633	-1.0275	0.395	0.9582	1.1143	1.1469	0.6127	2.0882	1.0454	1.1688	0.5161	1.2997	1.747	0.0983	1.1498	0.0946	-0.1012	0.9577	1.1456	0.2113	1.3088	0.9358	1.0357	-0.3803	0.3051	-0.4895	0.6408	0.1388
orf19.2992	RPP1A	0.0154	-1.1269	-1.0909	-0.5779	1.3366	-0.9457	-0.5442	-0.8861	-1.3463	-0.6319	0.4855	-0.2689	-2.4622	0.6527	0.2641	-1.4123	-1.2552	0.6892	-1.5032	0.0393	-1.8108	-1.1614	0.0623	-0.8803	-0.9128	-1.1065	0.3476	-1.375	-0.8421	-1.6514	1.4631	-1.8055	-1.5169	-1.0599	-0.9513	-1.8749	-0.2168	-1.5512	0.1441	-0.694	-1.3509	-1.575	0.8011	-1.027	0.6445	-2.2218	-1.2983	-0.4218
orf19.2994	RPL13A	-1.3312	-0.6507	-0.9875	-1.3409	0.2931	-1.6702	-1.9534	-0.2273	-0.7007	0.0693	-0.1606	0.054	-2.8065	0.4841	-1.2201	-0.9434	0.2984	-0.3937	0.5219	-0.3882	-1.2621	-1.2588	0.1021	1.2622	0.2879	-0.9946	-1.1291	1.2529	0.4441	-0.4161	0.747	1.5781	0.3521	-1.1996	-2.0226	1.2611	ND	-3.3481	0.3314	0.5185	-0.5678	-1.9267	-2.3178	0.6352	2.3324	1.1481	-0.9781	0.4629
orf19.5040	ASM4	0.9424	-0.8209	-0.6321	-0.4437	0.3048	-2.2573	-0.3313	-1.5093	-0.9971	0.7317	0.5851	-1.1126	0.3028	0.5231	1.0651	0.3635	0.6903	-1.834	-1.2878	-0.2135	-1.5354	-1.1177	1.0354	1.6764	-1.2425	-0.9829	0.2426	-0.9692	0.6534	0.931	0.6782	0.3409	0.0846	1.5188	-2.7917	-1.0484	2.4459	1.4843	0.0136	0.9769	0.4065	0.7513	-0.6179	-1.2439	1.5215	1.4754	0.4234	1.7504
orf19.5046	RAM1	0.0111	-0.1083	0.6202	0.6322	1.2769	-0.871	-0.6034	-0.6019	0.1185	0.4041	0.1478	0.6433	2.122	0.534	0.789	-0.3621	0.3087	0.3515	-1.1102	-0.8648	-1.156	-0.2357	-0.5713	0.5906	0.4819	-1.0466	-1.1048	-0.9243	-0.0981	0.2981	-1.0384	0.6805	0.498	0.6137	0.1631	0.1307	-0.6882	0.6814	-1.0747	0.1522	1.8637	2.8692	0.2707	-1.3227	-0.734	0.4227	0.1292	-0.1644
orf19.5171	PMT1	-2.3164	0.2917	0.196	0.1567	0.7825	0.1533	-0.2042	-0.0702	0.2055	-0.1686	0.0721	1.4176	-1.2477	0.8871	-0.3316	0.4876	0.3061	0.2318	0.7305	0.5267	1.2266	1.4939	0.0975	0.0726	0.5327	0.8763	-0.8713	-1.9109	-1.173	-1.1981	-0.1704	1.047	0.5385	1.3611	0.3196	0.2332	-1.3702	-2.3754	-1.0085	-0.9543	0.7072	0.4432	-1.9768	1.2055	-1.1864	0.3598	0.5535	-0.3702
orf19.1548	SNU23	-0.1682	-1.316	-0.7127	-0.6635	1.735	-0.9326	0.1552	-0.7688	-1.1851	0.4117	1.0751	0.0332	0.3599	0.6197	0.4545	0.4923	-1.0165	-0.7987	0.0957	-0.3396	-1.6599	-1.5454	0.7333	1.3253	-0.0327	-1.0029	-0.5455	-1.1226	1.6694	1.5563	1.2665	0.3098	0.2828	0.5489	-0.1307	1.1101	0.3409	-0.9077	-1.5191	0.7438	-0.4465	0.3117	-1.2852	1.6784	1.6395	1.7954	0.0692	0.9844
orf19.2965	ARR4	-0.6286	-0.93	-0.5881	0.017	-1.057	-0.3961	0.0538	-1.663	0.2902	0.0008	0.0008	0.6593	0.9123	0.1397	0.5746	-1.2258	-0.5192	0.204	0.1623	-1.2219	-1.1439	-1.0146	0.6391	-1.4455	0.6969	-0.683	0.1924	-0.5643	1.2634	0.5239	-1.1388	-2.7212	ND	0.3788	3.542	0.3046	-0.3058	2.5099	-3.0364	0.4529	-1.4231	-0.7007	1.4744	0.7401	-2.6402	0.2385	0.3645	0.313
orf19.4160	QRI7	0.3474	0.5629	0.8944	-0.4141	0.1288	0.201	-0.1844	-0.6668	0.6997	0.5312	0.5702	1.3066	0.8473	0.44	0.9366	0.1392	-1.6342	-1.2258	0.0449	-0.689	0.7504	1.1772	-1.5249	0.4156	-0.3337	0.7993	0.9502	0.2554	0.0023	0.634	0.0748	0.0006	0.9333	0.323	0.1355	0.5689	-1.5896	-0.781	-1.6413	-0.5817	0.2963	-0.4214	-1.0231	1.3093	0.0627	0.7574	0.8661	0.2272
orf19.4000	PHO2	1.2009	0.5315	-0.4367	0.0498	-1.6874	0.629	0.1871	-1.3394	-0.4042	0.6183	0.7144	-0.6477	1.2206	0.1137	0.4383	0.329	-0.8564	-0.5489	-1.25	0.2791	0.205	-0.0549	0.0616	-1.1481	2.2501	1.84	0.5159	-1.3624	0.8683	0.03	0.8778	-1.2133	-0.6543	0.7406	1.1467	-1.2771	1.2172	0.6927	-0.7234	0.6044	-0.4034	-1.6699	-2.9942	-1.7071	0.7993	0.2497	0.3543	0.1924
orf19.4001	MSS2	0.5199	0.1541	-1.2011	-1.7189	-1.8058	0.8321	0.7525	0.3365	1.6384	1.0573	1.4215	0.9129	0.1209	0.0653	0.8579	0.5417	0.1078	0.1283	-0.3019	0.6386	-0.5887	-0.5825	-0.6161	0.6415	0.3402	-0.4681	-1.6642	1.6497	0.8144	1.3771	-0.8572	0.6041	2.0201	0.7628	-1.0113	0.2397	-1.6543	-0.834	-1.9987	-1.5594	0.0561	0.4242	-1.4193	0.5017	1.3179	0.8541	0.2946	0.9508
orf19.5038	TRM3	-0.6237	-0.7924	-0.4556	-0.1204	0.8463	-0.9902	-1.0482	-0.8276	0.4082	-2.0662	-1.0355	0.5921	-0.6744	-0.7395	0.5078	0.1384	-0.5636	0.9098	-0.5841	-0.5381	-1.1859	-0.9999	0.8922	-0.7396	-0.6233	-0.4862	0.4649	-0.7142	-0.485	0.4145	2.3756	0.474	-1.3171	0.1993	0.8945	-1.199	0.474	-0.8022	-1.4546	-0.8332	-0.8955	-0.5381	-1.3535	0.8204	0.4988	-0.6524	-1.1741	-0.802
orf19.6502	YDL114W	-0.148	-0.6447	-1.0166	-0.9157	1.922	0.4863	1.3614	0.4897	-1.0938	1.8424	1.0467	-0.8613	1.353	1.3408	1.8235	2.8712	0.2886	2.1415	1.1388	0.9885	1.5943	2.6026	2.4084	2.6312	1.7119	0.8408	1.1592	-0.7163	-0.9559	-0.8215	0.9268	0.0333	0.9275	-1.3437	1.2614	1.0368	-2.1908	-2.7801	0.0528	-0.5241	-0.928	0.1778	-0.8516	1.781	2.3082	-0.2187	-1.1712	2.2843
orf19.1804	YDL119C	0.8192	-0.7328	-0.3942	-0.7165	1.0526	-0.6637	0.4691	-1.1398	-0.4633	-0.4075	-0.6754	-1.9631	-1.6259	-1.8518	-1.4122	-1.1201	0.0347	0.1749	0.5972	-1.0824	0.2207	0.4652	0.6498	-1.1255	0.1951	0.7784	0.6442	0.4535	-1.6598	0.3456	2.2577	-1.2186	-2.4339	1.3969	2.0849	1.167	1.4756	1.6978	0.8635	0.0199	-1.5298	0.141	-0.6391	0.8971	1.0985	-0.6866	0.1161	0.1687
orf19.7367	UBP1	-0.1378	0.0557	-1.2299	-1.7068	-0.6849	-0.7968	-0.7073	0.5625	0.1208	0.0622	0.0045	0.2839	-0.2608	0.6716	0.7575	0.2291	-0.4322	-0.4022	-0.5723	0.0362	1.8232	1.607	0.0749	0.6496	-0.5268	-0.7362	-1.8318	1.1044	1.4966	1.6613	0.2839	1.2028	0.3221	-0.5772	-1.0457	-0.3062	0.0324	-0.9701	-0.778	-0.119	-0.2174	-2.035	0.8658	-0.1533	0.3563	0.4155	-0.599	-1.2135
orf19.2341	HNT1	0.1763	-1.3621	-0.5188	-0.5684	2.1541	0.2722	-1.1551	-1.37	-1.0741	0.0008	0.4322	-1.1281	-0.5054	0.3013	-0.7693	-0.1895	0.4103	-1.874	0.3843	-0.1692	-0.6972	-1.1303	0.849	0.3234	0.498	-1.7501	-0.9373	-0.2681	-0.9982	-0.5987	0.3152	0.2848	-1.8383	-1.6679	0.7867	-1.9505	1.0157	1.2059	0.0744	0.685	-0.4441	0.431	-0.4381	-2.6656	-0.2521	0.2017	-0.5679	0.2546
orf19.403	PCL2	-0.9725	-1.5385	-0.5211	0.173	0.6849	-0.7432	-0.4228	-1.1406	2.0226	0.0008	0.0008	0.8224	-0.7554	-0.7731	0.7195	0.912	-1.3606	0.306	-1.2865	-1.9481	-1.6079	-0.2387	-0.1899	0.5306	-0.3487	1.0534	0.6046	0.5617	0.0499	-0.5112	0.681	1.679	0.8447	1.0114	-1.2397	-0.4669	-0.117	0.0411	1.0024	-0.6413	-0.6659	-0.4882	-0.8487	-0.9359	0.3747	-1.2421	0.3197	-0.2371
orf19.405	VCX1	0.1694	0.3211	-1.1553	0.0234	-0.1669	-1.8462	1.5313	0.5421	0.1221	0.6485	0.0008	-0.8565	-1.4817	0.1722	0.145	-0.8228	-0.6984	2.4543	-0.9384	-0.5499	-2.1174	-1.4585	0.9811	0.0725	-2.3047	-1.5592	0.0345	1.0838	-1.2988	-1.3837	0.7363	0.3743	0.5502	0.361	0.7546	-1.0278	0.3534	1.6448	0.0892	0.8422	-1.2024	-0.27	-0.6316	0.5902	-0.9506	-0.4503	-0.5222	0.3932
orf19.7188	RPP1B	0.4948	1.0947	1.1793	1.2407	-1.6876	1.3374	1.0452	1.8696	0.69	0.1996	0.0007	0.5892	0.6101	0.8127	0.3774	0.0228	1.2348	-0.1847	0.1445	0.4041	0.2711	0.5968	-0.5398	0.7362	1.6053	0.5576	0.1694	2.476	1.403	1.8503	0.3935	1.3208	0.4489	2.9789	-0.6731	0.1201	0.0279	0.6602	0.6015	0.702	0.3951	0.8765	0.3427	0.0686	0.2391	0.5984	0.6078	0.0284
orf19.4506	LYS21	-0.8132	-1.2565	-1.118	-0.275	-0.5051	-0.6824	0.4824	-0.5202	-0.7959	0.3645	0.3633	-0.9397	-1.1337	-0.9959	0.7523	2.5169	0.1761	2.0337	2.3155	0.6	-1.2249	-1.5684	-0.8057	1.0401	-0.9898	-0.5946	0.2245	0.3923	-0.9277	0.9147	-0.6946	-0.2718	-0.4401	1.5858	1.1399	-1.838	-0.344	0.5291	-1.4038	-0.7943	-0.7062	0.6156	-0.4625	0.0784	0.8211	-0.7677	-1.4379	1.0478
orf19.1683	PPH21	0.4628	1.6838	0.7236	1.0728	0.4743	-1.4539	-1.3157	-1.2075	-1.565	0.158	0.4224	1.2725	1.0426	0.8292	-0.8411	-2.2047	-0.7679	-0.6256	-0.8864	-1.0089	1.1367	0.878	-0.6341	-0.4588	1.3384	0.8642	1.2271	-1.614	-2.1905	ND	-0.5215	0.1207	1.7075	-0.6462	0.2489	-2.749	ND	0.1019	-2.2137	2.4962	3.2557	-0.2825	-0.3969	-0.6927	-1.4745	-1.2871	1.2871	-0.7163
orf19.7668	YGR287C	0.192	1.0385	0.3471	0.4563	-1.4634	-0.2853	0.5803	-0.9623	0.5738	-0.0927	0.5142	0.4281	3.0953	-1.204	-0.925	0.0744	0.0821	-0.6291	0.2648	-0.1242	-0.1533	0.4917	0.087	-0.7297	0.1672	1.2449	-0.5803	-1.4742	0.5472	0.1553	-0.9401	-0.5876	-0.2802	0.2529	0.7062	0.0863	0.1856	1.6757	-0.6095	0.3179	0.3035	0.407	0.0034	1.2185	-0.3062	0.2234	0.9061	0.0638
orf19.3468	ALG11	-1.5374	-0.8408	0.3037	-0.4905	0.1419	1.0498	0.3792	0.6229	0.6998	1.0016	0.2804	-0.4429	0.061	0.3892	1.9161	0.6262	1.0955	2.3599	2.8271	1.7734	0.209	0.195	0.7826	1.1631	-0.5758	-0.848	-0.4358	0.1092	-0.2754	-0.5664	-0.5882	-0.108	0.1171	0.8854	0.6005	1.0816	0.617	0.1122	0.226	-1.0979	-0.3939	-0.1003	-2.3357	1.8629	-0.3787	0.3642	-0.5263	0.9605
orf19.2921	PAC2	0.1927	0.2171	-0.6682	0.2	-1.1608	0.0536	0.6349	-0.519	-0.2798	0.7727	1.241	0.4944	2.5697	1.0564	-1.8073	1.6919	0.0469	-1.4861	1.0038	0.56	1.3184	0.5744	0.1538	1.3929	-0.2599	1.4479	-0.3752	0.2891	0.5122	0.6314	0.3213	0.0053	0.3955	0.707	0.7407	0.2857	-2.7541	0.4976	-1.3694	0.7672	-1.1226	0.1094	0.5766	2.0507	1.1366	2.6308	2.6109	1.2376
orf19.4725	SWI6	ND	ND	ND	ND	ND	ND	ND	ND	ND	0.0007	0.0007	ND	ND	ND	0.7434	0.1652	0.3703	-1.1515	-0.4341	1.3322	ND	ND	-1.1482	-1.1116	ND	ND	ND	ND	ND	ND	ND	ND	ND	ND	ND	ND	ND	ND	ND	ND	ND	ND	ND	ND	ND	ND	0.0678	-1.7175
orf19.4927	BNI1	ND	ND	ND	ND	ND	ND	ND	ND	ND	0.4917	0.0008	ND	ND	ND	1.1007	1.2857	1.0526	1.4218	-0.4699	0.2083	ND	ND	-0.7279	-1.0128	ND	ND	ND	ND	ND	ND	ND	ND	ND	ND	ND	ND	ND	ND	ND	ND	ND	ND	ND	ND	ND	ND	0.3397	0.0834
orf19.3071		ND	ND	ND	ND	ND	ND	ND	ND	ND	0.2547	0.0007	ND	ND	ND	0.7122	0.1647	0.198	0.5702	-0.4554	0.4178	ND	ND	-0.9015	-0.3842	ND	ND	ND	ND	ND	ND	ND	ND	ND	ND	ND	ND	ND	ND	ND	ND	ND	ND	ND	ND	ND	ND	0.069	0.0186
orf19.2416.1	MLC1	-1.6851	-1.6588	0.4699	0.2071	0.4575	-1.3928	-0.9032	-0.6278	-1.4787	-0.997	0.0277	0.4803	0.5339	-0.925	-1.6552	0.4044	-1.0901	1.191	-1.4575	-2.9668	-1.0607	-0.9669	-0.3863	-0.8676	0.0848	-0.9392	0.4241	-1.2256	-0.8305	-0.8005	0.7645	-1.2268	0.4034	1.9123	-2.5319	-0.6827	0.7819	-1.3932	-0.4754	-0.8616	-0.9608	-0.5344	-0.7741	0.6494	-2.011	-1.8131	-0.5353	0.2679
orf19.5182	CDC2	0.3263	0.3357	0.3027	1.0051	-1.1533	1.0714	0.1916	0.1367	1.0804	-1.0301	0.4472	0.1319	0.6328	0.5965	-0.9911	-0.6779	-0.6576	0.5859	-1.0994	-0.8894	0.1388	0.1033	-0.9667	-0.5748	0.9334	1.0183	0.528	0.3161	0.8359	1.166	1.2084	1.3319	1.5556	0.8903	0.4337	1.0086	-1.2099	-1.2224	-1.7573	-1.1683	0.1816	0.3187	-1.2366	1.3598	-0.9798	-0.7576	-0.5332	0.1048
orf19.6977	GPI1	0.5724	-0.8477	-0.8673	-0.4396	1.0686	0.1212	0.1338	-0.629	0.0579	0.3943	0.1734	0.9051	0.7761	0.791	-0.5981	-0.8173	0.0329	0.0656	0.2273	-1.4118	-1.6562	-0.5486	0.782	-0.2451	-1.2727	-0.5466	-0.689	0.1993	-0.7791	-0.9481	-0.9879	0.1437	-0.9704	1.3643	-1.7499	-1.0031	0.4038	-1.0422	-0.6692	-0.6723	0.2594	0.5599	0.0924	1.1371	-1.8369	-1.1159	-1.0153	0.0547
orf19.5440	RPT2	0.0735	1.2818	1.2554	1.2189	-1.4098	0.8895	0.538	1.0728	1.393	0.3804	0.6375	0.4536	-0.2653	0.9157	0.4387	1.8156	-0.9495	-0.6523	0.355	-1.1905	-0.3362	-0.765	0.1224	-0.7296	-0.3655	-0.9	-1.023	-0.145	0.1783	-0.5876	-0.7722	0.3808	0.391	0.7807	0.226	1.0938	0.3315	0.8282	0.8451	-0.4224	-0.3956	-0.3928	-1.6092	1.0278	-0.9104	0.8432	-0.9226	-3.1392
orf19.4242		ND	ND	ND	ND	ND	ND	ND	ND	ND	0.732	1.0499	ND	ND	ND	-1.1913	-0.6788	-0.7485	0.4627	0.5823	0.376	ND	ND	0.1817	-0.1706	ND	ND	ND	ND	ND	ND	ND	ND	ND	ND	ND	ND	ND	ND	ND	ND	ND	ND	ND	ND	ND	ND	-0.8045	0.916
orf19.3230	BOI2	-1.0292	0.1188	0.0733	-1.0925	0.7452	0.7001	1.2588	1.2648	0.1042	1.159	1.0735	0.5344	0.0389	0.7114	0.0313	2.6957	0.3793	0.5552	0.7199	0.6523	2.6093	2.3611	3.3615	3.0455	0.4524	0.4023	-0.5333	0.1245	0.5526	0.1922	0.0576	-1.0982	-0.6327	2.4633	1.7732	1.792	-1.403	0.1115	-0.5774	0.1005	-0.5981	-0.5734	0.2434	1.7082	0.0853	0.1974	0.3739	-0.8798
orf19.330.1	RUB1	0.3164	-1.0456	-0.4673	-0.2419	2.7954	0.4906	-0.9491	-0.5256	0.2305	0.0007	0.7048	0.386	1.116	1.39	0.9014	-0.5199	1.2656	1.8075	0.9114	0.5803	0.1328	-0.7057	0.2471	0.5289	-0.6975	-1.3475	-0.5637	0.1518	-1.2314	0.1135	1.1138	-0.4141	-0.4604	0.5492	0.2484	0.5522	0.0342	1.0709	-1.1547	0.4427	0.0159	0.4129	-1.8366	-1.5826	0.003	0.0628	-0.7708	0.1873
orf19.2622	YPT32	-2.0685	0.315	0.4101	0.7676	2.5905	2.0694	2.9071	0.4478	-0.5549	1.7777	1.9863	0.0149	0.0648	0.3488	1.6695	2.7676	0.5566	0.2672	-1.4402	0.034	-1.0573	0.6055	4.5675	6.312	0.6507	0.1179	0.7665	0.4567	-1.5697	-0.6591	0.3026	0.2324	-0.9485	0.5681	0.815	0.7906	3.7051	0.4541	0.8798	1.092	1.9247	1.6566	-1.359	-1.3521	3.1125	-0.7494	-1	0.435
orf19.3391		0.3413	1.1847	1.3447	1.5164	0.6279	0.8127	-0.7974	1.0831	2.6907	-1.0299	0.2424	0.5311	0.583	0.7272	-1.4408	1.4836	-1.4665	0.4635	1.4847	-1.6215	0.6047	0.5228	-1.0952	-1.0826	1.0878	1.1951	1.5031	-1.302	1.32	ND	-0.8506	0.6426	-0.2152	1.4128	0.4238	0.4138	1.1825	0.4129	-1.5444	1.9228	1.5878	1.3615	2.683	1.2347	-1.9832	-2.3549	-1.0476	-1.0735
orf19.2511		0.9137	0.7855	0.9016	0.7029	0.605	1.1218	1.3003	1.3974	0.973	1.8262	1.4215	1.7781	1.2469	2.4606	0.1996	1.4262	0.3879	-1.392	0.2844	1.244	0.6633	0.8421	0.6616	0.6578	0.8693	-0.8199	0.2226	1.3214	0.0721	0.3893	-2.0193	0.4089	0.9875	0.7555	0.2814	1.4869	0.1299	0.9536	0.684	0.8888	0.7549	0.4838	0.2028	0.3855	-1.2875	1.9638	-0.7219	1.4794
orf19.2828	ALF1	0.1813	-0.5477	1.0135	0.8419	1.0651	0.5875	-1.1688	0.2946	-0.8852	-0.9653	-1.2026	0.2545	0.2993	2.6019	1.303	0.8711	0.0487	-0.5238	0.3264	1.9265	0.7867	0.5672	0.8638	-0.861	-0.9051	-1.6765	0.5603	0.7166	-1.2285	0.2398	-1.7827	0.0432	-1.052	0.5492	0.3743	1.0764	0.2751	1.0288	0.6349	2.3245	0.002	0.3709	0.8235	-0.8142	0.7039	-1.171	-1.3554	0.2575
orf19.5964	ARF2	-1.7028	0.4101	1.0681	0.6095	3.0834	1.1125	0.8783	0.5554	-1.0125	0.6306	1.0057	0.4808	-0.7667	-0.5658	-0.6857	-0.5054	-2.0532	-1.5433	-0.9632	-1.1978	-0.2525	-0.6986	1.6927	0.277	-0.3764	0.3123	-0.5177	0.5102	0.2666	1.0746	1.1149	0.3662	-0.9051	1.1767	1.3584	2.8186	-0.8108	0.6223	2.0468	8.5375	8.184	4.1604	0.2084	0.1526	-0.4171	-0.5599	-0.4912	1.2917
orf19.1446	CLB2	1.611	-0.8276	0.4931	3.2262	0.7245	1.0853	-1.1206	0.3147	1.131	0.7799	0.2913	0.1832	-0.8923	0.1737	-2.0862	-1.0293	5.3772	1.9071	2.2846	2.5601	1.8107	2.4452	-0.2429	1.4081	-1.229	0.0406	0.1139	1.3515	1.3497	1.7405	0.1417	0.6095	1.1753	0.4665	1.3091	1.0155	0.1226	-0.8088	0.2204	0.2625	-2.4981	0.4797	-0.4043	0.5169	2.6811	1.6149	1.6037	0.2474
orf19.1490	MSB2	ND	ND	ND	ND	ND	ND	ND	ND	ND	0.0007	0.0007	ND	ND	ND	1.3238	0.9165	0.4401	1.6716	1.1804	1.7773	ND	ND	1	1.9842	ND	ND	ND	ND	ND	ND	ND	ND	ND	ND	ND	ND	ND	ND	ND	ND	ND	ND	ND	ND	ND	ND	0.6232	0.0604
orf19.5827	BUB2	-0.1893	-1.6737	-1.02	-0.3267	1.3291	-1.0343	0.114	0.3306	-1.0573	-2.1119	-0.9391	-1.146	0.2032	0.018	-0.533	-0.7311	2.1538	3.5374	3.0069	2.3335	1.3669	1.2426	-1.0218	-1.5689	-0.4795	-0.5498	0.583	-2.1704	-1.0264	-0.468	1.0361	1.225	-1.5749	0.8337	-0.8761	-1.2121	0.1049	-1.0374	-0.8538	0.324	-1.0239	-0.5706	-0.2822	1.8117	0.2331	-1.2191	0.0014	0.7455
orf19.6801	RPD3	ND	ND	ND	ND	ND	ND	ND	ND	ND	0.2059	-0.8271	ND	ND	ND	1.0063	0.907	-2.1363	-0.5489	-1.8466	-1.3025	ND	ND	-1.2451	-1.2462	ND	ND	ND	ND	ND	ND	ND	ND	ND	ND	ND	ND	ND	ND	ND	ND	ND	ND	ND	ND	ND	ND	0.8561	-1.387
orf19.1792	CDC16	0.441	0.4385	-1.1513	-0.5531	0.7948	-0.8818	-0.8533	0.2106	-0.3088	0.8542	0.8508	0.0702	0.5596	-0.2383	0.7691	0.7698	0.6617	0.608	0.0443	0.8326	0.9923	0.7942	1.9657	2.6699	-1.818	-2.2294	-1.9492	0.6605	0.2065	1.0119	0.2188	1.274	1.5848	0.1463	0.0414	0.5384	0.0997	-0.4501	0.1086	1.9056	3.43	1.6314	0.149	1.3281	0.9452	-1.0156	1.1775	2.2365
orf19.171	DBP2	0.189	0.3101	-2.3521	-1.831	1.214	-1.1248	0.6493	0.176	-0.4245	1.2211	0.3425	1.4747	1.1079	-0.1913	0.2104	-1.1784	0.3653	0.0304	-0.599	-0.3202	-0.3936	-0.5534	0.0408	-0.2344	-1.7598	-1.22	-1.5889	1.971	0.8756	-1.0454	0.9551	0.0437	-0.2107	0.4762	1.6896	0.69	0.6604	-0.3647	-0.7889	1.7092	0.8455	-0.2292	0.3165	-0.1664	1.1873	-1.5594	0.4399	-0.0977
orf19.5229	DIS3	ND	ND	ND	ND	ND	ND	ND	ND	ND	-0.7509	-0.4982	ND	ND	ND	0.0244	-0.7775	-1.3453	-0.6867	-1.0516	-1.889	ND	ND	0.2487	-0.7021	ND	ND	ND	ND	ND	ND	ND	ND	ND	ND	ND	ND	ND	ND	ND	ND	ND	ND	ND	ND	ND	ND	-1.1399	-0.5575
orf19.6127	LPD1	-0.641	-0.9464	-0.7896	-0.2561	-0.1114	-0.6152	-0.7785	-1.1576	-0.437	-0.6499	-0.7691	-0.7314	-0.339	0.497	1.446	0.4386	1.9408	2.0726	1.3117	-1.2559	0.033	0.1629	-1.7931	-1.498	0.2141	-0.3638	-0.3131	-0.5675	-0.2474	-0.3103	0.0341	-0.3315	-0.1762	1.0878	0.4534	-0.1854	0.009	-0.3182	-0.2146	-0.3612	-0.5677	-0.206	-0.3665	1.1454	0.6964	-0.4738	0.0833	0.1868
orf19.866	RAD30	-0.5529	-2.4579	-0.7678	-0.3602	2.7943	-1.0781	-0.2847	-1.5532	-0.9778	1.2907	0.4215	-2.0726	-2.1105	0.4623	0.2078	-0.2288	0.3455	0.3954	0.0348	-1.0333	-0.8728	0.3798	0.3484	-0.1695	-1.6631	-1.1825	-0.9882	-1.3954	-0.5971	-1.0627	-0.8972	1.0434	-1.1865	-1.098	-0.376	-0.9363	1.3863	1.5541	-1.9596	1.7824	0.6944	0.8756	0.3233	-2.4987	-0.5426	0.1627	-0.9585	-0.5205
orf19.5447		ND	ND	ND	ND	ND	ND	ND	ND	ND	0.3321	0.6114	ND	ND	ND	1.8344	0.4682	0.2178	0.3107	-0.4531	-0.3455	ND	ND	1.2193	1.6851	ND	ND	ND	ND	ND	ND	ND	ND	ND	ND	ND	ND	ND	ND	ND	ND	ND	ND	ND	ND	ND	ND	0.0701	-1.7899
orf19.4755	KEX2	0.4029	-1.9188	-1.0369	-0.9853	0.004	-1.8421	-1.605	-2.192	-1.1048	-0.7486	-1.303	1.5301	0.2298	-0.8007	-1.0658	-0.8602	0.5901	-0.8038	0.2616	-0.1569	-0.6774	-1.0771	0.4422	0.2045	-1.3425	0.0533	0.2957	-1.4126	-1.4441	0.0051	-0.3266	0.9033	-2.2111	1.1457	0.6649	-0.755	1.8199	2.3642	1.4827	0.6782	0.3331	1.2602	0.015	-1.8693	0.5317	0.6597	-0.7562	0.7984
orf19.5949	FAS2	-1.1141	-1.2905	-1.4646	0.1224	-1.2655	-0.3104	0.4007	-1.5795	-0.4002	1.0295	0.4625	-0.9834	-0.88	-0.8609	1.7154	0.7151	0.5974	0.8481	1.0368	0.0965	-0.4199	-1.4275	0.6382	1.014	-0.6052	0.9131	2.6099	-0.5207	0.1257	0.0515	0.9496	0.1774	-1.3912	0.7625	-1.5406	0.5857	-1.1426	-1.9282	-1.2944	0.0832	-2.447	ND	1.4591	0.9343	0.7891	-1.8645	-1.011	-0.3992
orf19.2690	MGM1	ND	ND	ND	ND	ND	ND	ND	ND	ND	-0.6789	0.2232	ND	ND	ND	1.3095	-0.5796	0.316	0.8766	0.3108	-0.3757	ND	ND	-0.6674	0.0124	ND	ND	ND	ND	ND	ND	ND	ND	ND	ND	ND	ND	ND	ND	ND	ND	ND	ND	ND	ND	ND	ND	-1.4167	-1.2346
orf19.7355	SSN8	0.2734	0.6272	0.2722	1.1025	2.041	0.3783	1.9018	0.1938	-1.0953	0.0007	0.0007	0.3897	0.9866	1.4539	-0.2225	0.7873	0.1758	1.2315	-1.0626	0.8185	0.3225	0.8289	-1.2859	-1.574	0.6141	0.4247	-1.101	0.3216	0.3757	-1.015	2.1768	2.2641	0.6145	3.2799	ND	2.8988	0.9518	0.1281	1.7523	0.0477	0.9275	0.9505	-1.4143	-1.7329	-2.187	-0.2795	0.496	0.1084
orf19.4147	GLR1	0.2222	0.6315	1.2525	1.0509	1.8293	0.204	-0.4395	1.5646	0.334	0.3403	0.7152	0.6897	-1.2229	0.1249	0.9859	-0.2382	0.5887	-0.1459	1.7804	0.7263	-0.3186	0.0968	0.6349	-1.1046	-0.6369	0.3726	0.0693	0.6293	0.6848	1.0335	-1.0628	-1.7882	-1.4097	1.7787	1.285	0.1763	2.1772	0.599	1.7666	0.7546	0.6218	0.8248	1.6908	-0.5329	-1.3264	0.4141	0.0004	0.4034
orf19.147	YAK1	1.9665	0.0988	0.0398	0.3009	0.4191	-0.0796	0.4175	-2.0427	0.2538	0.0008	0.0008	0.3998	-0.7997	0.261	-0.9959	-1.1968	-0.6547	-1.674	-0.5911	0	0.5213	0.2908	-0.3638	-1.0353	0.6347	0.2677	0.9082	-0.7787	0.3922	-0.6743	2.0562	0.2429	-0.6664	0.2508	-0.6313	0.735	0.7727	-1.8147	0.389	0.5003	-0.7126	-0.9096	0.0186	-1.3754	-0.5914	-0.4541	0.6117	0.1492
orf19.3642	SUN4	ND	ND	ND	ND	ND	ND	ND	ND	ND	0.1696	-0.7978	ND	ND	ND	-2.0579	-1.241	0.4995	0.2137	0.2583	-0.1698	ND	ND	-0.6812	-1.0782	ND	ND	ND	ND	ND	ND	ND	ND	ND	ND	ND	ND	ND	ND	ND	ND	ND	ND	ND	ND	ND	ND	0.5794	-0.1762
orf19.4208	RAD52	-0.9586	1.1328	0.833	1.1463	-1.3518	0.5833	0.9783	0.0462	1.3625	0.2893	1.7839	2.5693	2.1257	-1.9132	-0.4554	-0.4753	-0.4248	-0.6095	0.7615	0.4515	0.508	0.3806	0.7992	-0.8664	0.6639	1.1262	0.6309	0.8593	0.9451	0.8959	-1.6812	-0.8868	0.2194	-0.3185	0.2877	0.5446	-1.0356	-1.2314	-1.8121	-1.3181	-0.576	0.2559	-1.1319	1.7822	0.9364	2.2079	0.8674	-0.3828
orf19.3865	RFX1	1.6529	1.7072	1.0629	1.4055	-0.5733	1.0083	0.8995	1.827	0.9778	-1.1176	-0.4464	-0.1709	0.1866	0.6946	0.2773	0.0319	-0.8513	0.214	-0.6938	-0.1196	0.6948	0.8067	-1.3201	-0.6234	1.1097	1.8815	0.9759	1.1921	0.7311	1.0204	0.6816	0.8458	0.9409	1.745	0.0461	-0.8609	1.5162	1.0414	1.1575	0.011	0.3368	0.9772	1.3172	-0.9904	-0.6151	0.468	0.6084	-1.0457
orf19.7238	NPL3	ND	ND	ND	ND	ND	ND	ND	ND	ND	0.4522	-1.0112	ND	ND	ND	-1.1965	-0.3221	-0.8241	1.216	-0.7972	-0.2642	ND	ND	-1.1949	-0.1633	ND	ND	ND	ND	ND	ND	ND	ND	ND	ND	ND	ND	ND	ND	ND	ND	ND	ND	ND	ND	ND	ND	0.5812	0.3441
orf19.6515	HSC82	0.5438	-0.5216	-1.3578	-1.1931	1.5351	1.1678	-0.789	1.3305	-0.8835	1.7191	1.6623	0.5167	0.4844	0.6526	0.7942	0.2321	-0.6396	0.32	-1.6934	-1.2879	-1.0245	-0.9066	2.4902	1.711	-1.7898	-0.9153	-0.4952	0.614	0.5583	0.2228	1.6644	0.8495	0.3596	1.255	0.0611	-0.405	-0.6597	-1.3051	-0.3577	-0.8656	0.705	0.7577	-0.7329	1.1236	0.8235	-0.7273	-0.4724	0.4068
orf19.4112	YJR142W	-0.1866	-0.0827	0.6495	0.5952	0.3697	0.4142	0.2158	0.277	-1.3748	1.6165	1.1223	0.4044	0.7868	1.3474	0.6203	0.0596	0.111	0.5565	1.3367	-0.7355	-0.0574	0.4307	-0.3752	-1.3149	0.0868	-0.5989	0.6561	1.5415	0.5597	-0.6494	1.1267	0.879	0.1156	0.5193	-0.4489	-0.6842	1.5435	1.7198	-0.7606	0.2389	-2.0092	0.4248	0.5905	0.4204	1.118	0.38	-1.0008	0.5845
orf19.5934	TOP3	ND	ND	ND	ND	ND	ND	ND	ND	ND	0.3149	0.9196	ND	ND	ND	0.3163	0.6736	-0.6502	-0.9306	-0.7919	-0.8127	ND	ND	-0.5828	0.6115	ND	ND	ND	ND	ND	ND	ND	ND	ND	ND	ND	ND	ND	ND	ND	ND	ND	ND	ND	ND	ND	ND	-0.6544	0.2255
orf19.5411	UBC12	-1.241	0.2473	0.3453	0.853	-0.4257	1.3795	0.7682	-0.3268	1.1938	1.4282	1.1194	1.3143	1.4621	-1.9238	-0.7359	0.128	0.1604	0.466	0.0869	1.3335	0.1437	-0.9063	-1.5617	0.4952	0.4374	-1.2901	-0.5552	0.0644	0.2303	0.6434	-2.3336	-0.4906	0.517	ND	0.6885	-0.6553	ND	-1.2113	-1.2581	-0.3973	0.4687	0.6498	0.7816	1.2388	0.1471	1.237	1.5531	1.4577
orf19.6364		1.1455	-1.0883	-0.2675	0.0197	-0.1107	-0.5523	-0.6909	-0.678	-1.1909	0.0485	0.0007	0.1418	-0.5987	0.5652	-0.7419	-0.8846	-0.6422	-1.9782	-0.7026	-0.6274	0.6823	0.11	-0.9914	-1.1871	-0.8339	-1.1386	0.3163	-1.3552	-1.3862	-0.7621	0.4614	0.6452	-1.2392	0.8033	-0.6022	-2.3171	0.2281	0.2176	0.4979	-0.7124	0.5576	1.5235	0.175	-0.1791	-0.1481	0.1931	-0.9298	0.2791
orf19.4906		1.1943	-0.9879	-0.5421	-0.4154	1.0533	-0.3279	-0.5989	-0.8762	-0.3647	0.1368	1.1491	-0.7282	-0.5872	0.4613	0.1312	0.5815	-0.682	-0.1808	1.0102	-0.0769	0.0449	0.2877	-0.4527	1.0798	-0.9246	0.264	0.2918	-0.4334	0.3033	0.6716	0.124	0.1148	1.0824	ND	0.2579	1.8892	1.3866	ND	ND	0.215	0.2609	0.4443	0.4603	-1.2838	-0.8845	0.2965	0.258	0.7798
orf19.207	YMR317W	0.5802	0.6101	0.7929	0.983	1.5123	1.1846	0.9317	1.3597	0.4117	0.0008	0.0008	0.0136	0.5461	1.3249	-1.1117	1.0607	-2.4677	0.1662	0.0933	0.1469	-1.1366	0.0267	0.6615	0.1852	0.3563	0.7489	0.5963	0.6432	1.5371	1.438	-1.5023	0.867	1.2533	1.1879	0.2183	0.6793	0.9765	1.1333	1.1099	0.6042	1.3762	1.0281	0.3531	-1.0267	0.5888	0.5238	0.4828	1.4219
orf19.2990	EXG1	-1.3691	-1.3929	-0.6663	-0.4169	-0.9359	-1.3561	-1.3963	-0.6198	0.3914	-0.9462	-0.8967	1.8126	0.739	0.2297	0.5688	-0.6135	0.71	0.8974	1.6659	-0.854	-0.399	-0.6908	-2.2791	-1.5545	1.061	1.1248	1.2024	0.1417	-1.2814	0.4771	-0.4173	-1.1256	-0.9569	1.7728	0.2724	-0.2805	0.2673	-0.6538	-0.7969	0.4708	0.5639	0.7911	0.8079	1.0919	-1.1528	-0.9324	-0.832	0.4924
orf19.3765	RAX2	0.0316	-0.7189	0.3651	0.5779	0.733	0.9377	0.5659	1.1361	0.3429	0.2118	0.0008	0.2281	0.5952	0.7105	0.1451	-1.122	-1.9999	-2.4551	-0.589	-1.1085	-0.9121	0.3271	-1.5661	-0.7586	-0.6823	-0.8402	0.5266	1.4795	1.7992	1.8702	-1.6279	1.0298	1.2769	ND	3.1083	ND	0.2923	ND	ND	0.8219	0.7792	1.1764	0.4379	0.6375	-1.4113	-0.8096	-0.2316	-1.0364
orf19.2941	SCW4	0.2568	0.5941	1.0131	1.2437	0.9711	2.3255	0.9798	1.3794	0.6901	1.3361	1.6991	0.3334	0.5283	-1.4998	0.7228	1.1843	1.1747	-0.8979	0.4142	0.2548	0.1593	0.8584	0.5793	1.1345	0.881	0.68	-0.9836	1.2466	1.1403	1.5377	0.6648	0.6471	1.2416	2.7896	2.4624	1.739	0.3925	ND	2.1383	0.3869	0.8362	1.322	1.5934	-0.6185	-0.5352	0.4013	0.5512	0.7114
orf19.1911	YJL171C	0.4831	0.7127	1.3141	1.0949	-0.528	1.9061	1.7937	1.6224	1.1702	0.4721	0.6	0.878	1.0632	1.3503	-0.5824	0.2246	-0.2137	0.2529	0.0454	-0.6907	0.0729	0.4755	0.0531	0.7047	0.8368	1.0191	1.3798	1.3118	1.4801	0.069	1.3733	0.5728	1.5477	2.571	1.4344	1.1844	0.8075	3.8614	1.0782	-0.1239	0.4883	1.0514	0.3104	0.1642	1.0566	0.5941	-0.3851	0.8019
orf19.1989	DCW1	0.0305	0.1091	1.3437	1.5035	0.7076	0.8844	-0.9151	2.3594	1.7825	0.8712	0.0225	-0.8257	0.5039	1.5541	-1.1989	-0.2645	0.368	1.6376	2.0237	1.6579	0.4985	1.1144	-1.2262	0.1943	1.2743	0.1821	0.6076	-1.0745	-1.1557	-0.3175	0.3074	1.5571	0.3212	0.6264	1.1101	0.8388	0.7357	1.1666	1.0298	0.1812	0.4751	0.7856	0.6341	1.1563	1.3263	2.2483	0.6186	-1.0703
orf19.2075	DFG5	0.5208	0.6591	1.1125	0.5166	0.5928	1.9692	0.7908	1.0905	1.5184	0.6675	0.626	1.5366	0.5914	0.6281	0.3343	0.717	-1.3282	0.6678	0.017	0.4072	0.6994	0.5931	0.5739	1.101	0.0979	0.8293	0.1367	0.5313	0.5723	0.8319	0.7115	0.827	0.1416	-1.6625	0.4598	-0.6381	ND	0.4121	1.5182	0.6104	0.9519	1.5256	0.0909	-0.9851	-0.7982	0.3373	-0.3001	0.9276
orf19.5297	TFB1	0.3406	-0.2913	-0.0798	0.3371	1.6103	1.5718	-1.587	1.1625	-1.7906	0.0008	0.0008	0.6049	-0.3488	0.236	0.2711	0.0777	0.2889	0.3002	0.061	0.0495	0.6911	0.8595	-0.2917	-0.5525	2.616	-0.7883	-0.545	0.7954	0.972	0.0515	1.1305	0.8545	0.612	1.9164	-0.9857	-1.0009	1.1885	-0.8451	-0.6902	-0.9284	0.7147	0.4754	0.7778	0.6215	ND	1.5422	0.0878	0.103
orf19.2330	UTP6	0.3422	-0.718	0.3392	0.0244	1.2002	0.651	0.4756	0.2186	0.1922	0.4715	-0.4779	0.3684	0.0962	0.113	0.1581	0.7362	-1.4933	0.2594	-0.7898	-0.4741	-0.9813	-0.6035	-0.8122	0.1917	0.1886	0.3626	0.3122	-0.8414	-1.0228	-0.5426	0.9703	1.2597	0.336	0.4531	-0.8285	-0.9536	-1.3756	-1.6245	-1.8673	0.062	-0.2802	0.067	-1.2839	0.4464	0.2035	0.107	-0.7636	0.1794
orf19.5650	PRO3	0.0566	2.1673	0.0718	0.0358	-1.0407	0.9859	1.3719	0.1331	0.9464	0.0008	0.0008	1.0091	0.6253	-0.4671	0.0999	-0.4197	-0.986	0.0814	-2.1155	-0.3624	0.6277	0.1173	-1.7041	-0.3724	1.3224	0.6667	0.3721	-0.2289	0.8715	-0.9895	0.2027	0.3351	1.426	0.3328	-1.6806	-0.6042	-0.7007	-0.4995	-0.3567	-0.8006	-0.6884	-2.2861	-0.8451	0.1983	0.4195	2.0961	1.0594	-0.9871
orf19.3911	SAH1	-0.5604	-0.5063	0.4065	-0.6904	0.0392	0.7241	-0.6362	-0.8976	-0.1401	0.5364	-0.4613	-0.1111	2.0364	1.0774	0.2694	-0.6683	-0.6906	0.0764	-1.311	0.2209	1.1692	0.1727	-1.6689	-1.1756	0.3913	0.8351	-0.5098	1.1921	1.187	1.1299	0.2617	1.8057	2.2746	1.5534	-0.7079	-0.0464	0.3647	-1.7051	-0.8215	-0.5226	-0.9191	0.3525	0.8287	2.8637	0.4218	1.7284	0.355	0.3409
orf19.898	HEM2	0.5276	-1.509	-0.3225	-0.339	-1.5462	-1.5115	-1.6887	-1.2259	-1.1546	-1.3247	-1.474	-0.9642	-1.2035	0.605	0.0046	-0.3879	-2.1533	0.461	0.4687	-1.1001	-0.6094	-0.4285	0.1947	-0.6004	-1.3216	-0.9385	0.471	0.3488	-0.6	0.1482	-1.8441	0.0563	0.0123	0.0717	-1.3016	0.0604	-0.9473	-0.9029	0.0354	-0.312	-0.4658	0.2275	-0.3743	1.2534	-1.174	-1.7967	-0.265	-1.0736
orf19.3467	SEC27	0.96	0.2026	-1.2767	-1.7433	-0.9472	0.1087	0.4155	0.632	0.1449	0.1121	-0.2101	0.0748	-0.738	0.4775	0.383	-0.2532	-0.8115	-0.5246	-0.9843	-0.8065	0.8986	1.5297	0.6742	0.2401	0.1822	0.2166	-0.0652	1.4965	1.8048	1.4797	-0.9585	1.4097	1.947	0.6298	1.6847	0.9912	0.3787	0.3569	0.6494	0.6372	0.8027	-0.3157	0.5845	-1.1798	0.29	0.3078	0.4471	-0.6308
orf19.117	SEC9	1.7756	1.7109	1.468	1.3466	0.2562	1.1256	0.073	1.4683	1.1493	-0.8384	-1.5331	0.3495	0.8196	-0.3967	-0.9449	-1.4649	2.6508	1.9255	2.6102	2.4061	-0.7295	0.1396	-0.3831	-0.3635	-0.9039	-0.9973	-1.2494	2.881	1.663	2.1864	1.0683	2.3264	1.9424	0.4394	0.4523	1.2698	1.3694	0.4175	0.6061	1.2424	1.0936	1.1695	1.7198	-1.665	-0.4413	-0.5121	1.2703	2.7277
orf19.406	ERG1	0.2626	-1.1995	-0.5631	-0.6523	-0.2609	-1.4823	-0.8784	-1.4455	-0.5654	3.7745	4.6462	-1.3656	-0.973	-1.3146	-0.6422	-0.7374	1.2833	0.1604	0.6875	-0.0826	-1.9789	-1.5989	0.471	0.5098	-1.7074	-1.5516	0.0257	-0.8446	-1.0665	-0.7747	1.8427	-2.0694	-1.4224	0.0174	-0.6995	0.1987	1.158	1.4584	-0.4109	1.0497	0.2744	0.1272	-0.2393	-0.998	0.3155	0.9108	0.0016	0.2184
orf19.1799		0.8362	-0.2277	0.0892	1.0762	0.0692	-0.4812	0.9532	0.7306	-1.1297	0.4287	1.2757	-0.6294	-1.4448	1.7519	1.2332	0.7911	-0.4838	0.0725	-1.2245	0.2199	-1.7112	-1.7128	0.0998	1.0613	-0.6182	-0.5201	-0.5129	-0.7864	-0.6414	-0.5841	0.7585	-1.7499	-1.8256	0.5282	-0.9952	-1.019	1.0307	0.519	0.9642	0.9011	0.7184	0.9955	0.5154	-1.214	-1.2561	0.5996	0.1124	0.5336
orf19.5608	RPC34	-1.921	-0.5858	-0.7506	-0.3831	1.2737	0.5047	-0.6479	-0.8082	-1.4646	0.0008	0.0008	0.7926	-0.6714	0.736	0.9328	0.5235	1.2862	0.8579	1.4803	-0.3253	0.4792	0.6686	0.4605	1.0906	0.0818	0.503	0.6065	-0.4292	-0.8233	0.2267	0.3284	0.4679	-0.0369	1.2133	0.7726	0.393	-0.9346	-1.0479	-0.8385	0.6962	-0.8621	-0.0508	-1.6698	0.0891	0.1435	-0.7002	ND	-1.1037
orf19.3177	RIB2	0.5894	0.8352	0.6057	1.2854	2.0033	1.0467	0.4168	1.2808	-0.7193	-1.1175	0.2642	-1.4416	-0.8882	1.1974	0.2976	-0.304	0.378	1.4916	-1.0481	0.8352	0.0041	0.2981	-0.3266	-0.3752	0.3267	-0.7916	-0.7919	0.3042	1.7027	0.5251	-0.5409	0.8926	-0.8342	-2.2968	-0.9892	0.1636	1.954	1.5331	1.4248	1.109	1.1692	1.3242	2.8555	-1.012	0.1901	-1.1886	-1.2986	-0.3513
orf19.1047	ERB1	-0.6985	-0.7426	-0.4151	0.5534	3.6112	-1.1515	1.8574	-0.6631	0.0305	0.0761	0.2909	-0.2306	0.104	0.5535	-1.2524	-1.7813	0.251	1.2686	0.7565	-0.7216	0.0451	0.8687	0.0767	-0.9122	1.3465	0.432	0.5802	-0.2534	-1.3304	-1.4094	0.4688	0.2717	1.4214	1.1938	1.5979	0.0016	0.5388	-2.1496	ND	0.1018	0.3569	0.387	0.6351	0.317	ND	-1.4035	-0.9933	1.1427
orf19.1648	RAD50	1.1054	0.5925	0.6328	1.1868	0.3718	0.5613	-0.7532	0.3722	-0.1594	0.417	-0.8236	-0.4542	1.0277	1.4793	-0.2416	-0.6596	-0.8298	1.0588	-1.2758	0.1565	0.4314	0.8161	-0.7555	-1.3956	-0.3266	0.4654	0.5212	0.8694	0.6466	0.1983	-1.8893	1.6767	0.5305	-0.5804	-1.3939	0.8042	1.7526	1.8788	0.9277	1.0549	0.3438	0.8229	0.2118	-1.0857	-1.0728	0.4129	0.1933	0.1091
orf19.338	YMR196W	1.1024	1.7426	1.3884	1.1789	0.6759	2.2646	1.1893	1.2217	1.6399	0.8049	0.6743	1.0399	1.1553	0.2363	0.0393	-0.5267	-0.9592	0.3926	-1.824	-0.8667	1.9269	2.0957	-0.8045	-1.4782	0.7264	0.4137	0.4084	-0.5563	1.2221	0.6562	-1.2063	0.719	0.2485	2.7756	2.9614	0.0741	2.5721	1.3661	ND	-0.4442	0.9595	0.8432	-0.3013	0.1511	-0.4481	0.215	0.2753	0.9572
orf19.7448	LYS9	-2.0124	-0.4764	0.3592	0.572	3.9063	-1.1501	0.76	0.5805	1.4717	0.0007	0.328	-0.1869	1.4938	-1.1899	-1.8732	0.0257	0.0511	1.5038	0.8751	1.9614	1.6876	1.7072	-1.462	-0.3133	0.4947	-0.5121	-0.435	-0.5495	0.111	0.4184	-0.8757	-0.6693	1.153	ND	-1.4295	-1.0754	0.8078	-1.8276	-2.4006	0.335	0.1937	0.3549	1.7737	2.7307	2.7216	0.8877	0.8988	1.1081
orf19.4892		0.2055	0.168	0.271	2.0774	0.9306	2.3602	3.6926	0.9121	0.0632	-0.9281	-0.8633	-0.5874	-1.2654	1.8866	1.2795	2.1089	0.3617	0.5354	1.2591	-0.4805	-1.2373	-1.7214	-1.0024	0.4595	0.0462	1.7502	0.7571	1.6201	0.3828	0.0053	0.4654	1.4326	0.2827	ND	0.6194	1.9926	1.3312	ND	2.0909	0.6441	1.7924	1.4356	0.4313	0.3785	0.4068	0.0045	-1.8291	1.0227
orf19.4764	PAN2	-0.6237	-1.6995	-1.2707	-0.4682	0.4673	-1.0658	0.0374	-0.4348	0.8606	1.635	-0.6396	-1.2217	-0.6725	0.0048	0.1921	0.3413	-0.4677	-0.3784	-0.2894	-1.8935	0.2586	0.398	-0.6639	0.3456	0.711	-1.4123	0.4578	1.1085	-0.5069	0.5676	1.1064	0.1344	0.7382	0.6984	0.6361	-1.1629	-0.4601	0.0408	0.6695	-0.8955	0.3404	0.9179	0.6365	-0.5926	1.1287	-1.0852	0.1868	-2.2874
orf19.2075	DFG5	-0.9852	0.988	0.7239	0.6808	-2.0136	0.9184	0.2875	0.1316	1.5271	0.2492	0.5815	0.4824	1.1584	-0.681	-1.1837	0.0833	0.2671	0.3021	-0.8804	0.6253	0.6848	0.4098	0.1005	1.5373	1.3256	1.7677	0.7394	1.0164	0.9937	0.7883	-3.1542	-0.5811	0.5844	0.8953	0.2753	0.0356	-1.8694	-1.6896	-2.7313	-1.4603	0.3682	0.5786	0.1361	0.6004	-0.7715	2.0645	1.4786	-0.7433
orf19.7520	POT1	0.2464	0.2847	0.4609	0.8541	-0.8788	0.6601	0.4606	0.2606	-0.507	1.435	1.6448	1.3374	0.6211	-1.5482	-0.5521	1.3787	-1.0817	0.0017	0.1235	-0.2971	-1.287	-0.5909	0.2493	0.9743	1.2407	0.8456	0.6155	0.4007	0.6887	0.2706	-1.7822	-1.2199	0.5121	-1.5417	-1.7227	-1.0816	ND	-0.588	-0.3638	0.0981	0.9518	1.1839	0.5412	0.9656	0.5982	1.5699	0.7924	0.3076
orf19.3006	GGA2	0.0465	-0.4524	-0.3709	0.1028	0.2224	-0.4861	-0.3235	-1.2267	-0.4796	0.0007	0.0007	0.1931	-1.2509	0.6237	0.1665	0.0283	-0.6059	0.6925	0.6166	-0.7118	0.7269	0.5321	0.5192	0.6686	0.2142	0.143	0.2759	0.2065	-0.2704	0.2437	1.5097	1.0363	0.4871	1.465	1.6536	0.1291	-0.4455	0.3289	0.116	-1.0561	-1.2366	-0.7306	0.556	0.5095	0.7159	0.8478	0.0951	0.1107
orf19.3228	YER113C	0.2926	0.0101	0.644	0.1543	-1.5325	0.0399	0.4933	-0.5918	-1.5074	0.1957	-0.5601	0.1559	1.1002	-2.2417	0.5655	0.3212	4.3442	1.9553	2.117	1.2839	1.1717	1.2071	0.272	-0.4236	0.7451	0.093	0.5481	-0.6834	0.2247	0.454	-2.0336	-2.4474	2.0759	1.4357	0.6856	1.1205	-0.8622	-2.0723	-2.6293	0.5634	0.1728	0.3223	1.0388	1.8023	0.9085	0.1489	0.5302	1.0515
orf19.1070	YMR010W	1.2662	0.129	0.0423	-0.8477	0.8578	-0.7744	-1.2565	-1.3223	-1.4253	-1.1119	-1.0515	0.0504	-1.5078	-1.3267	-0.5664	-0.6015	0.7548	0.8073	-0.3227	0.1527	-0.9891	0.1164	0.1871	-0.783	0.0385	-0.6057	0.2416	0.0934	-0.6977	0.475	1.4655	-1.0268	0.1468	1.8008	0.5281	-0.8936	-2.3766	-1.0147	0.305	-0.8332	-0.8036	0.2364	-0.3284	0.6694	-1.0485	0.4768	-0.874	0.4927
orf19.2926	PSO2	0.487	0.2115	0.9387	1.4096	0.3528	-0.9928	0.5336	0.5278	1.3971	0.1236	0.0917	0.6314	0.6383	2.2128	-0.562	-0.5234	0.7047	-1.1293	0.1655	0.297	0.6938	0.5187	0.212	0.345	-0.3591	-0.4306	0.0491	1.6821	-1.0736	-0.7116	-1.4489	0.7614	0.6227	0.2336	0.8691	1.2149	0.1602	0.5868	-0.3442	0.3714	0.6005	0.9365	0.9101	-1.0182	-1.5457	-1.0414	0.0742	-1.2045
orf19.3921	FSH3	0.7652	0.6055	0.5374	0.6973	-1.1056	0.633	0.5469	1.1528	0.445	1.6168	1.8205	0.3187	0.0401	-0.8543	-0.7592	0.5316	-1.1127	0.1259	0.5941	-0.9154	-1.5456	-1.4887	0.5904	-0.4197	0.5199	0.8602	0.9392	-0.7395	0.0708	0.2133	-1.1788	-1.1348	-0.5618	-1.5915	-0.8446	-0.9844	0.7117	0.1584	0.5408	0.7831	1.004	1.2419	ND	0.3733	0.0183	1.0484	1.6433	0.095
orf19.1154	EGD1	-1.5934	-1.1723	-0.7973	0.0241	0.1284	-0.3974	-0.2615	-0.429	0.1423	0.5269	1.7073	-0.6445	0.4707	1.0442	0.0417	0.3984	2.1713	1.5151	1.5414	2.3749	0.0078	0.2268	1.064	1.223	-1.0302	-0.7498	0.3773	1.4102	-0.6419	-0.4378	-0.9776	0.2295	0.3179	2.0972	1.2984	0.9765	0.3374	-0.8487	0.0543	-0.4409	0.8044	2.1928	0.678	1.478	-0.2349	0.5728	-1.4101	2.6285
orf19.2112	PRP18	0.0281	0.5689	1.1946	1.0585	-1.3085	1.6725	0.6147	0.1502	2.9274	1.7145	1.0401	2.0707	1.5659	-0.7321	0.2511	0.7314	1.1174	-0.3257	1.8546	1.1036	0.1694	-0.6162	-0.4757	0.9081	-0.5242	0.6058	0.0703	0.8901	0.9796	0.2689	-0.9006	0.5243	2.9803	0.1346	1.4784	0.457	0.3356	-1.3612	-3.1231	-1.8856	1.9154	0.5117	-0.797	0.5545	2.5459	0.328	1.0116	0.0074
orf19.4243	CUE2	1.4729	0.3116	0.5684	0.4338	ND	-0.8521	0.7977	0.8435	0.8271	1.1726	0.9981	2.2758	0.5535	3.4556	-0.0868	0.6428	-0.3512	-1.8368	-0.983	-1.325	1.0403	0.9772	1.6778	1.0373	2.735	0.5646	1.1385	1.0134	0.7238	0.6866	ND	0.5545	-2.112	0.1041	ND	1.1415	ND	3.268	ND	-0.8474	0.1406	0.2114	-0.7649	0.4683	-1.9055	3.1538	-1.552	0.3722
orf19.7107	YJL122W	-0.8701	0.5239	2.0017	1.2946	-2.8899	0.5797	0.6935	2.772	2.5909	0.7525	0.2099	0.4509	3.729	-2.5547	-2.3861	-0.5829	0.3395	-0.4076	-0.8587	0.5183	-0.8666	-1.6059	-1.7849	-1.009	0.5272	0.0654	0.2139	0.3704	0.8173	1.0215	0.4625	0.1775	2.0374	-2.2944	0.2967	1.26	0.228	0.7504	-0.4799	-1.5378	-1.4256	0.2106	ND	ND	0.9412	ND	1.3415	-0.6632
orf19.2747		0.3457	0.7961	0.5675	0.851	0.8827	-0.3314	0.4182	-0.9296	0.9297	0.4633	-1.4516	0.2157	0.9822	0.8865	0.2678	-1.3397	-0.1085	-1.083	-2.3638	0.2943	1.2296	1.2474	-0.7442	-1.065	-1.5806	0.9302	-0.6217	0.6575	0.0445	0.6471	-2.0211	0.3992	0.5525	1.7141	0.0193	0.808	-1.691	1.119	1.1916	0.911	0.3176	0.6584	1.1233	0.1172	-1.709	0.0217	-1.0256	-0.2791
orf19.5043		0.5729	0.4109	0.6066	1.7795	1.9175	1.1613	-1.1041	-1.6808	0.1946	0.0008	0.0008	-1.2234	1.0131	1.5855	0.0982	-0.7221	1.9412	0.3332	-0.1946	0.3921	-0.8287	0.5054	0.0188	0.0194	0.4668	0.1192	-1.3041	0.2244	-1.629	1.9802	0.0953	-1.1158	0.376	0.1557	0.3326	0.4626	0.9345	1.1364	-0.6869	0.8816	0.0081	0.2209	0.7679	-1.0841	2.4631	-0.6248	1.9356	0.0127
orf19.6586		0.5549	0.904	1.5158	0.1858	2.4592	2.1037	0.3541	1.6117	0.5527	0.0867	0.5934	0.6037	1.3321	1.7611	-1.5323	-0.4201	0.1889	1.5739	0.6249	1.7345	0.832	1.2652	-0.2899	0.3527	1.4672	1.9785	-0.5077	0.7318	0.916	1.6761	-1.7922	0.8085	0.8524	2.8474	2.28	1.1404	1.0164	0.9397	0.6558	-0.6377	0.9138	0.378	-0.2073	-0.5724	1.2982	1.1834	0.6818	0.4582
orf19.2481		-0.6088	-1.4996	-0.97	0.3103	-0.7635	-0.98	-1.3466	-1.3034	1.1441	-1.7314	-1.0088	0.377	-1.0096	0.2568	0.3039	-0.6315	0.2459	0.294	1.3317	0.5816	0.3284	0.182	-1.4454	-0.7554	-0.8306	0.2922	0.9911	-0.4995	-1.4558	-0.7199	0.9667	0.8154	0.1307	0.7911	0.9704	-0.4936	0.2648	0.0329	-0.8728	-1.4499	-0.7964	-1.2277	0.1817	-0.5763	-1.0457	-0.6625	-0.9281	0.0558
orf19.3368		ND	0.4327	0.5095	0.1252	0.8954	-0.9443	-2.2634	-0.5878	-0.3658	0.1585	1.4699	-2.6276	-0.9968	-0.5667	0.8897	0.6806	1.1034	0.1343	-0.9009	0.6627	1.0234	-1.7156	0.1033	1.0561	-1.7554	0.1832	0.0836	-0.6898	-1.0567	-1.2852	0.6639	0.7406	-1.2156	2.0866	0.1666	-2.6351	ND	1.7169	ND	0.36	0.5076	0.4803	0.7114	0.07	0.0784	0.1211	-0.5263	-0.5404
orf19.1953		ND	ND	ND	ND	ND	ND	ND	ND	ND	0.5368	0.3568	ND	ND	ND	0.0196	-1.0332	0.6224	0.5348	0.1462	1.6259	ND	ND	0.1248	0.4282	ND	ND	ND	ND	ND	ND	ND	ND	ND	ND	ND	ND	ND	ND	ND	ND	ND	ND	ND	ND	ND	ND	-0.1074	-2.0153
orf19.7594		0.5389	-1.2155	0.0916	0.2895	0.1147	-0.588	0.2894	-0.9321	0.0821	0.2291	0.6859	1.5358	1.147	1.3192	0.5981	0.4392	-2.6969	-1.6967	-2.5438	-1.6811	0.1954	-0.8477	-2.405	-1.1673	-0.9867	0.1749	0.7913	-0.7907	1.1477	0.8826	ND	1.4078	-0.7669	-1.927	0.6893	2.1741	0.1045	1.1249	3.1333	1.4196	0.448	0.3024	0.042	0.1976	-3.3016	-1.4323	1.4702	0.4635
orf19.3828		-0.7103	-1.6848	-0.4293	0.0945	0.4525	-1.44	-0.9547	-1.7718	-4.7793	0.0007	0.0007	0.7642	-1.0862	-0.4155	-0.6035	-1.2275	-0.9002	0.5503	-0.7036	-0.6137	-0.6193	-0.3557	0.1789	-0.5478	-0.6844	-0.8951	-1.3261	0.1973	0.6793	1.3436	-2.0963	0.69	-1.4518	0.4355	0.7877	-0.7816	0.7142	1.6589	0.0408	-0.8677	-1.0764	-0.6797	1.4632	0.4181	0.1925	0.0691	0.2055	2.1205
orf19.2489	KAP123	-1.1809	-0.6011	-0.5443	-0.7238	0.7196	-0.4783	-0.2852	-0.4777	-1.1114	0.0008	0.0008	-0.3863	-1.4941	-1.0002	-1.8453	-0.7257	0.3713	-0.503	-0.7072	0.0155	-0.4548	-1.098	-1.1604	-1.2653	-0.797	0.1972	1.2052	-0.8768	-0.9208	-0.6592	1.3597	0.1783	0.2961	0.4625	0.6752	-1.4872	-1.4079	-0.8025	0.0252	-0.5214	-1.0813	-0.4927	0.4146	0.6217	0.088	-0.0737	-0.6727	-0.6994
orf19.4416	VPS13	0.1115	1.2736	1.2984	1.5071	-0.6452	1.2341	1.3564	1.6576	1.5485	0.0622	0.5355	1.3131	1.8646	0.7308	0.0633	0.3697	-0.8583	1.6563	0.565	-0.4914	0.4301	0.6914	-0.9656	-0.6401	1.5136	1.0399	0.4381	0.8784	0.8453	0.9363	-0.9657	1.0658	1.3909	1.0352	-0.6173	-1.5714	0.4167	0.6461	0.1256	-0.936	1.3141	0.9106	-0.4579	-0.9541	0.958	0.6331	-1.1094	0.8455
orf19.7585	INO1	0.2642	0.2308	0.638	0.7892	0.5857	0.2585	0.2697	0.2674	-0.1599	-0.6877	0.1344	1.1154	1.8417	-1.2347	-2.2538	-0.7874	0.9247	0.9051	0.4086	0.8909	1.9141	2.0509	2.8005	0.2871	0.6468	1.2315	0.2226	-1.2804	0.7956	0.1614	-1.64	-0.8674	-0.8333	-1.5636	2.0747	-0.8451	-1.7719	0.2686	-1.2471	-1.2134	-1.5393	-1.1144	2.3408	1.0592	-0.7227	0.8834	1.2728	-0.6794
orf19.7440	STE6	0.5616	0.218	0.805	0.8822	0.2304	1.2109	1.4799	1.0902	0.073	1.6656	1.3745	1.4451	0.7	1.0651	0.6667	1.3735	1.3172	1.6723	0.2309	1.269	0.0406	0.2578	2.2703	1.7892	1.049	0.0482	0.3826	1.1782	1.53	0.8361	0.0489	-1.6105	0.7053	0.2689	-0.4052	-0.8327	0.9696	0.9326	1.0038	0.8114	1.0034	1.3023	-1.1481	-0.5559	0.3411	-1.2761	0.2816	0.4461
orf19.5730	YDR539W	0.0401	1.1453	2.7071	2.4241	0.7994	1.8542	1.4007	1.9456	2.0351	0.5303	0.9825	1.0336	0.2226	1.4557	-0.839	-0.7282	0.6659	1.8803	1.3657	1.8736	0.8149	0.7883	-1.0058	-0.1818	2.6824	2.7568	2.6585	-0.5303	-0.4652	-1.2802	-1.7525	-0.4437	1.1099	-1.3921	0.8362	-1.4983	1.8742	0.1708	0.7299	1.9436	-0.8484	-1.032	0.0224	-0.3714	-0.1777	-0.8911	0.2339	0.4105
orf19.2618	MET2	0.5203	0.2018	0.2744	0.6983	0.9461	-0.814	0.4219	-0.5635	-0.4266	0.3489	-0.8893	0.4683	1.1343	-0.5022	0.2625	-0.5159	0.2979	-0.3052	0.4569	0.6478	-0.8064	-0.3934	0.2921	-1.1822	0.1026	0.1625	0.3637	-0.2078	0.0304	0.1935	-1.6596	-1.5741	-1.0415	0.9907	1.2447	0.6254	1.2167	1.6532	0.5856	0.8011	0.6498	0.2387	0.2437	-0.3912	-0.6469	0.5979	0.4262	0.0145
orf19.5206	SHQ1	-1.2211	-1.4329	-0.7065	0.3714	0.091	-1.2639	-1.6198	-1.4528	-1.7356	0.5534	-0.9489	-0.5582	0.387	-0.3504	0.1555	-1.8971	-0.5811	0.3636	-1.8433	-1.3404	0.3294	-0.3718	-0.7209	-0.5562	0.1104	0.2917	0.4229	-1.567	-0.6979	-1.307	1.9034	1.0986	0.399	1.0036	-0.265	-0.8072	-0.3872	-0.3362	0.3435	-0.7918	-0.9032	0.2482	0.0444	0.863	0.4233	-1.4879	-1.1454	0.4572
orf19.3321	MDM38	0.6788	0.3577	0.7622	1.0345	-0.938	0.8909	0.2583	1.1506	1.1017	-1.6286	-1.565	-0.7812	0.3821	0.4719	1.3448	1.0301	0.0343	-0.912	-0.931	-1.2037	-0.093	1.0465	-1.7323	-0.6336	0.8518	0.7352	0.2599	1.1078	1.9765	1.1577	-1.5096	0.8895	0.5557	0.038	-0.9006	-0.4142	-0.6051	1.0274	0.0718	0.6491	-0.4725	0.9727	0.1249	1.4107	-0.9914	1.4507	1.03	0.6157
orf19.889	THI20	-0.3597	-1.6301	-0.8089	-0.7096	0.9176	0.3728	0.0417	-2.2634	-1.6945	2.1059	1.3193	-1.9422	-1.6196	0.8063	-1.5669	0.3366	0.8393	1.4022	0.9662	0.4428	-0.4071	-0.6045	0.9299	0.5444	-0.9155	-0.7033	-0.3685	-0.5604	-1.5155	-0.3888	0.4764	-0.8762	-0.8612	1.0794	-1.4385	-0.3968	1.869	0.8335	0.0182	0.8772	-0.3581	0.9574	0.9154	-2.1399	-1.3898	-0.95	-0.4376	2.1464
orf19.3329	LCB3	0.7728	0.5686	0.7831	0.4342	-0.8368	0.0488	0.863	0.1045	0.4381	1.5338	0.4352	0.552	0.4157	-0.2241	1.1637	0.137	0.0584	-0.2002	-0.311	-1.0247	0.3906	0.1553	0.5136	1.7987	1.612	0.4848	1.7066	-1.2885	0.4319	0.8255	-1.2738	0.1457	-0.3897	0.0815	0.9316	0.8525	-0.1968	0.3867	-0.9725	0.3111	-0.6895	-0.3855	1.4951	1.0207	0.6416	1.1952	0.0731	1.9467
orf19.3815	UBP11	0.5508	-0.554	0.0078	0.4482	0.3595	0.694	0.0329	-0.5972	-0.7077	0.6311	0.7195	-1.6288	-0.3101	-1.3685	0.6069	0.7072	0.4992	0.1344	1.6025	0.3302	-1.2485	0.1162	1.2006	0.5475	-1.0759	-0.8218	1.0455	-0.9136	0.0614	0.2835	-1.5135	-1.4465	0.1102	0.5827	0.9312	-1.6772	2.7383	1.0762	0.7982	0.7148	0.1972	0.1546	0.017	0.1657	-1.2987	0.1993	0.5064	0.7019
orf19.7115	SAC7	0.2886	0.6867	0.8687	1.111	0.4186	1.3433	1.6749	0.6078	0.619	1.19	1.3736	-0.741	0.7782	-0.8924	-0.5788	0.4969	-0.8953	-0.8737	-0.3797	-0.2257	-0.8201	-0.6447	0.405	0.5017	-0.78	0.2681	-0.7127	0.1346	1.4503	1.203	-1.2391	-0.2246	0.7577	-1.2199	0.7633	-0.5716	1.4269	1.0107	1.1222	0.4876	1.4499	1.7456	0.2144	0.0633	0.3247	0.6273	1.3562	1.0624
orf19.6562	RNH201	2.0399	0.6161	0.8077	0.9509	1.8378	1.6554	1.2823	2.6636	0.7689	1.0714	1.6692	0.4336	2.3564	1.2947	1.2268	1.4652	1.3437	0.4122	0.9754	0.9199	-1.0242	0.2637	0.2917	1.3565	-1.2263	1.0034	2.0006	1.6072	0.1659	0.9875	0.9392	0.8543	-0.3626	1.5983	-1.202	-0.8144	1.5458	1.2113	1.3161	0.7285	0.9787	1.7551	-2.4223	-0.9032	-2.1948	-1.2551	0.507	1.3359
orf19.2676	IKI1	-1.4285	-1.6709	-0.3328	-0.7025	0.5982	0.6286	-1.0018	-1.2583	-1.3582	0.7189	0.6092	-2.214	0.4456	0.0428	0.8695	0.0653	0.7081	1.0614	0.3913	0.0417	-0.8533	-0.2772	0.0353	-0.3036	0.0631	-0.5652	-0.1935	0.0059	-1.5979	-0.332	0.0988	-0.7354	-0.0965	0.485	-0.8058	1.0135	-0.6247	-1.4782	0.9704	-0.2336	0.2396	0.7392	-1.2196	1.1936	-0.6576	-1.8731	-1.3591	0.5093
[truncated: 1,736 more rows]
[truncated: 26 more columns]
